# Supplementary material for: Transcriptomics of diapause in an isogenic self-fertilizing vertebrate
Source: PubMed Central journal article supplement (PMC4657215; doi:10.1186/s12864-015-2210-0), 2015-11-23
Supplement: 12864_2015_2210_MOESM1_ESM.pdf [file 12864_2015_2210_MOESM1_ESM.pdf]

**Supplementary Table S1.** Abundances of transcripts identified from all three references. Listed transcripts are only those with  $p\_values \leq 0.0002$  and  $FDR \leq 0.05$  (see text).

| NGS | assembler | gene_id     | locus              | sample_1       | sample_2        | value_1 | value_2 | log2(fold_change) | p_value  | FDR       |
|-----|-----------|-------------|--------------------|----------------|-----------------|---------|---------|-------------------|----------|-----------|
| WGS | ABYSS     | XLOC_000030 | 1006226:0-119      | cdRNA02-Dia-R1 | cdRNA05-postDia | 4034.78 | 19643.6 | 2.2835            | 0.0001   | 0.0499641 |
| WGS | ABYSS     | XLOC_000030 | 1006226:0-119      | cdRNA01-preDia | cdRNA05-postDia | 3272.98 | 19643.6 | 2.58539           | 5.00E-05 | 0.0289221 |
| WGS | ABYSS     | XLOC_000633 | 1145608:18-115     | cdRNA01-preDia | cdRNA05-postDia | 678.869 | 15845.7 | 4.54481           | 5.00E-05 | 0.0289221 |
| WGS | ABYSS     | XLOC_000633 | 1145608:18-115     | cdRNA04-Dia-R3 | cdRNA05-postDia | 605.302 | 15845.7 | 4.71029           | 5.00E-05 | 0.0289221 |
| WGS | ABYSS     | XLOC_000714 | 1162821:4896-6557  | cdRNA02-Dia-R1 | cdRNA05-postDia | 4.60538 | 38.4108 | 3.06012           | 5.00E-05 | 0.0289221 |
| WGS | ABYSS     | XLOC_001085 | 1245327:0-92       | cdRNA03-Dia-R2 | cdRNA05-postDia | 23781   | 116635  | 2.29412           | 0.0001   | 0.0499641 |
| WGS | ABYSS     | XLOC_001085 | 1245327:0-92       | cdRNA02-Dia-R1 | cdRNA05-postDia | 13505.4 | 116635  | 3.1104            | 5.00E-05 | 0.0289221 |
| WGS | ABYSS     | XLOC_001085 | 1245327:0-92       | cdRNA01-preDia | cdRNA05-postDia | 11889.5 | 116635  | 3.29424           | 5.00E-05 | 0.0289221 |
| WGS | ABYSS     | XLOC_001263 | 1289175:1-118      | cdRNA01-preDia | cdRNA04-Dia-R3  | 278.389 | 3495.65 | 3.65039           | 0.0001   | 0.0499641 |
| WGS | ABYSS     | XLOC_001263 | 1289175:1-118      | cdRNA01-preDia | cdRNA03-Dia-R2  | 278.389 | 4069.01 | 3.86951           | 0.0001   | 0.0499641 |
| WGS | ABYSS     | XLOC_001268 | 129004:0-67        | cdRNA01-preDia | cdRNA05-postDia | 118140  | 16581.8 | -2.83283          | 5.00E-05 | 0.0289221 |
| WGS | ABYSS     | XLOC_001268 | 129004:0-67        | cdRNA02-Dia-R1 | cdRNA05-postDia | 112133  | 16581.8 | -2.75754          | 5.00E-05 | 0.0289221 |
| WGS | ABYSS     | XLOC_001268 | 129004:0-67        | cdRNA03-Dia-R2 | cdRNA05-postDia | 100335  | 16581.8 | -2.59716          | 5.00E-05 | 0.0289221 |
| WGS | ABYSS     | XLOC_001404 | 1321710:9777-12103 | cdRNA03-Dia-R2 | cdRNA05-postDia | 2.18478 | 23.4252 | 3.4225            | 0.0001   | 0.0499641 |
| WGS | ABYSS     | XLOC_001687 | 1386513:0-89       | cdRNA02-Dia-R1 | cdRNA05-postDia | 11610.8 | 61794.5 | 2.41201           | 5.00E-05 | 0.0289221 |
| WGS | ABYSS     | XLOC_001734 | 1398059:0-152      | cdRNA01-preDia | cdRNA04-Dia-R3  | 229.801 | 2224.69 | 3.27514           | 5.00E-05 | 0.0289221 |
| WGS | ABYSS     | XLOC_001734 | 1398059:0-152      | cdRNA01-preDia | cdRNA03-Dia-R2  | 229.801 | 2326.89 | 3.33994           | 5.00E-05 | 0.0289221 |
| WGS | ABYSS     | XLOC_001944 | 1441199:98-936     | cdRNA03-Dia-R2 | cdRNA05-postDia | 39.7164 | 6.4759  | -2.61658          | 0.0001   | 0.0499641 |
| WGS | ABYSS     | XLOC_001944 | 1441199:98-936     | cdRNA04-Dia-R3 | cdRNA05-postDia | 38.1668 | 6.4759  | -2.55917          | 0.0001   | 0.0499641 |
| WGS | ABYSS     | XLOC_001960 | 1445990:0-105      | cdRNA01-preDia | cdRNA05-postDia | 3433.83 | 21177.7 | 2.62466           | 5.00E-05 | 0.0289221 |
| WGS | ABYSS     | XLOC_001960 | 1445990:0-105      | cdRNA02-Dia-R1 | cdRNA05-postDia | 2809.06 | 21177.7 | 2.91439           | 5.00E-05 | 0.0289221 |
| WGS | ABYSS     | XLOC_002168 | 1486847:0-78       | cdRNA03-Dia-R2 | cdRNA05-postDia | 5799.07 | 40242.6 | 2.79483           | 5.00E-05 | 0.0289221 |
| WGS | ABYSS     | XLOC_002335 | 1521010:0-114      | cdRNA01-preDia | cdRNA05-postDia | 4931.08 | 26502.6 | 2.42616           | 5.00E-05 | 0.0289221 |
| WGS | ABYSS     | XLOC_002335 | 1521010:0-114      | cdRNA04-Dia-R3 | cdRNA05-postDia | 4505.63 | 26502.6 | 2.55634           | 5.00E-05 | 0.0289221 |
| WGS | ABYSS     | XLOC_002335 | 1521010:0-114      | cdRNA03-Dia-R2 | cdRNA05-postDia | 3807.07 | 26502.6 | 2.79938           | 5.00E-05 | 0.0289221 |
| WGS | ABYSS     | XLOC_002719 | 1601028:0-133      | cdRNA02-Dia-R1 | cdRNA05-postDia | 691.824 | 4834.55 | 2.80491           | 5.00E-05 | 0.0289221 |
| WGS | ABYSS     | XLOC_002780 | 161046:0-119       | cdRNA01-preDia | cdRNA05-postDia | 3053.45 | 18005.9 | 2.55995           | 5.00E-05 | 0.0289221 |
| WGS | ABYSS     | XLOC_002936 | 164835:9452-26881  | cdRNA01-preDia | cdRNA05-postDia | 1.96798 | 13.5228 | 2.78061           | 5.00E-05 | 0.0289221 |
| WGS | ABYSS     | XLOC_002986 | 1661360:0-119      | cdRNA01-preDia | cdRNA05-postDia | 18879.5 | 2239.63 | -3.07549          | 0.0001   | 0.0499641 |
| WGS | ABYSS     | XLOC_003476 | 1773601:9029-13253 | cdRNA03-Dia-R2 | cdRNA05-postDia | 102.72  | 10.4072 | -3.30306          | 5.00E-05 | 0.0289221 |
| WGS | ABYSS     | XLOC_003476 | 1773601:9029-13253 | cdRNA04-Dia-R3 | cdRNA05-postDia | 92.5226 | 10.4072 | -3.15222          | 5.00E-05 | 0.0289221 |
| WGS | ABYSS     | XLOC_003476 | 1773601:9029-13253 | cdRNA01-preDia | cdRNA04-Dia-R3  | 14.0068 | 92.5226 | 2.72368           | 5.00E-05 | 0.0289221 |
| WGS | ABYSS     | XLOC_003476 | 1773601:9029-13253 | cdRNA01-preDia | cdRNA03-Dia-R2  | 14.0068 | 102.72  | 2.87451           | 5.00E-05 | 0.0289221 |
| WGS | ABYSS     | XLOC_003547 | 1789444:0-119      | cdRNA01-preDia | cdRNA05-postDia | 4859.58 | 828.763 | -2.5518           | 5.00E-05 | 0.0289221 |
| WGS | ABYSS     | XLOC_003881 | 1861224:0-83       | cdRNA04-Dia-R3 | cdRNA05-postDia | 16152.1 | 95492.2 | 2.56366           | 0.0001   | 0.0499641 |
| WGS | ABYSS     | XLOC_003881 | 1861224:0-83       | cdRNA02-Dia-R1 | cdRNA05-postDia | 15289.1 | 95492.2 | 2.64288           | 0.0001   | 0.0499641 |
| WGS | ABYSS     | XLOC_003881 | 1861224:0-83       | cdRNA03-Dia-R2 | cdRNA05-postDia | 14998.4 | 95492.2 | 2.67057           | 5.00E-05 | 0.0289221 |
| WGS | ABYSS     | XLOC_003881 | 1861224:0-83       | cdRNA01-preDia | cdRNA05-postDia | 11593.7 | 95492.2 | 3.04204           | 5.00E-05 | 0.0289221 |
| WGS | ABYSS     | XLOC_003971 | 1880164:0-112      | cdRNA01-preDia | cdRNA02-Dia-R1  | 8866.39 | 536.324 | -4.04717          | 5.00E-05 | 0.0289221 |
| WGS | ABYSS     | XLOC_003971 | 1880164:0-112      | cdRNA02-Dia-R1 | cdRNA05-postDia | 536.324 | 7277.88 | 3.76234           | 0.0001   | 0.0499641 |
| WGS | ABYSS     | XLOC_004111 | 1912252:0-447      | cdRNA03-Dia-R2 | cdRNA05-postDia | 92.0356 | 763.441 | 3.05225           | 5.00E-05 | 0.0289221 |
| WGS | ABYSS     | XLOC_004111 | 1912252:0-447      | cdRNA04-Dia-R3 | cdRNA05-postDia | 89.6358 | 763.441 | 3.09037           | 5.00E-05 | 0.0289221 |
| WGS | ABYSS     | XLOC_004111 | 1912252:0-447      | cdRNA01-preDia | cdRNA05-postDia | 34.4377 | 763.441 | 4.47046           | 5.00E-05 | 0.0289221 |
| WGS | ABYSS     | XLOC_004430 | 1980940:0-11583    | cdRNA01-preDia | cdRNA04-Dia-R3  | 7.20976 | 39.101  | 2.43918           | 5.00E-05 | 0.0289221 |

|     |       |             |                       |                |                 |          |          |          |          |           |
|-----|-------|-------------|-----------------------|----------------|-----------------|----------|----------|----------|----------|-----------|
| WGS | ABySS | XLOC_004430 | 1980940:0-11583       | cdRNA01-preDia | cdRNA03-Dia-R2  | 7.20976  | 41.4144  | 2.52211  | 5.00E-05 | 0.0289221 |
| WGS | ABySS | XLOC_004696 | 2037673:0-74          | cdRNA02-Dia-R1 | cdRNA05-postDia | 33792.3  | 206792   | 2.61341  | 5.00E-05 | 0.0289221 |
| WGS | ABySS | XLOC_004963 | 2103326:0-119         | cdRNA04-Dia-R3 | cdRNA05-postDia | 5729.83  | 39395.8  | 2.78148  | 5.00E-05 | 0.0289221 |
| WGS | ABySS | XLOC_004963 | 2103326:0-119         | cdRNA02-Dia-R1 | cdRNA05-postDia | 5216.76  | 39395.8  | 2.91682  | 5.00E-05 | 0.0289221 |
| WGS | ABySS | XLOC_004963 | 2103326:0-119         | cdRNA03-Dia-R2 | cdRNA05-postDia | 5002.78  | 39395.8  | 2.97724  | 5.00E-05 | 0.0289221 |
| WGS | ABySS | XLOC_004963 | 2103326:0-119         | cdRNA01-preDia | cdRNA05-postDia | 3821.8   | 39395.8  | 3.36572  | 5.00E-05 | 0.0289221 |
| WGS | ABySS | XLOC_005091 | 2137065:0-111         | cdRNA01-preDia | cdRNA05-postDia | 7486.84  | 52491.8  | 2.80966  | 5.00E-05 | 0.0289221 |
| WGS | ABySS | XLOC_005989 | 2188352:1-3542        | cdRNA04-Dia-R3 | cdRNA05-postDia | 264.872  | 23.4769  | -3.49598 | 5.00E-05 | 0.0289221 |
| WGS | ABySS | XLOC_005989 | 2188352:1-3542        | cdRNA03-Dia-R2 | cdRNA05-postDia | 259.018  | 23.4769  | -3.46374 | 5.00E-05 | 0.0289221 |
| WGS | ABySS | XLOC_005989 | 2188352:1-3542        | cdRNA01-preDia | cdRNA03-Dia-R2  | 43.6234  | 259.018  | 2.56988  | 5.00E-05 | 0.0289221 |
| WGS | ABySS | XLOC_005989 | 2188352:1-3542        | cdRNA01-preDia | cdRNA04-Dia-R3  | 43.6234  | 264.872  | 2.60212  | 5.00E-05 | 0.0289221 |
| WGS | ABySS | XLOC_006061 | 2188496:375-9934      | cdRNA01-preDia | cdRNA03-Dia-R2  | 12.3464  | 64.4925  | 2.38504  | 0.0001   | 0.0499641 |
| WGS | ABySS | XLOC_006067 | 2188506:38309-50481   | cdRNA01-preDia | cdRNA04-Dia-R3  | 4.02964  | 21.44    | 2.41158  | 0.0001   | 0.0499641 |
| WGS | ABySS | XLOC_006067 | 2188506:38309-50481   | cdRNA01-preDia | cdRNA03-Dia-R2  | 4.02964  | 22.9358  | 2.50888  | 5.00E-05 | 0.0289221 |
| WGS | ABySS | XLOC_006227 | 2188952:223944-228047 | cdRNA02-Dia-R1 | cdRNA05-postDia | 8.212    | 49.2746  | 2.58504  | 5.00E-05 | 0.0289221 |
| WGS | ABySS | XLOC_006227 | 2188952:223944-228047 | cdRNA04-Dia-R3 | cdRNA05-postDia | 7.84564  | 49.2746  | 2.65088  | 5.00E-05 | 0.0289221 |
| WGS | ABySS | XLOC_006227 | 2188952:223944-228047 | cdRNA03-Dia-R2 | cdRNA05-postDia | 7.45265  | 49.2746  | 2.72502  | 5.00E-05 | 0.0289221 |
| WGS | ABySS | XLOC_006262 | 2189015:615-3027      | cdRNA04-Dia-R3 | cdRNA05-postDia | 25.3542  | 141.511  | 2.48062  | 0.0001   | 0.0499641 |
| WGS | ABySS | XLOC_006262 | 2189015:615-3027      | cdRNA03-Dia-R2 | cdRNA05-postDia | 23.8108  | 141.511  | 2.57123  | 0.0001   | 0.0499641 |
| WGS | ABySS | XLOC_006413 | 2189470:17695-23090   | cdRNA01-preDia | cdRNA05-postDia | 8.96956  | 43.8448  | 2.2893   | 0.0001   | 0.0499641 |
| WGS | ABySS | XLOC_006413 | 2189470:17695-23090   | cdRNA02-Dia-R1 | cdRNA05-postDia | 6.44815  | 43.8448  | 2.76545  | 5.00E-05 | 0.0289221 |
| WGS | ABySS | XLOC_006501 | 2189680:32642-38719   | cdRNA01-preDia | cdRNA04-Dia-R3  | 13.7902  | 65.9719  | 2.25821  | 0.0001   | 0.0499641 |
| WGS | ABySS | XLOC_006967 | 2191278:2202-5007     | cdRNA03-Dia-R2 | cdRNA05-postDia | 85.1695  | 9.6015   | -3.14901 | 5.00E-05 | 0.0289221 |
| WGS | ABySS | XLOC_006967 | 2191278:2202-5007     | cdRNA04-Dia-R3 | cdRNA05-postDia | 79.0432  | 9.6015   | -3.04131 | 5.00E-05 | 0.0289221 |
| WGS | ABySS | XLOC_006967 | 2191278:2202-5007     | cdRNA02-Dia-R1 | cdRNA05-postDia | 40.0558  | 9.6015   | -2.06068 | 5.00E-05 | 0.0289221 |
| WGS | ABySS | XLOC_007270 | 2192126:21143-29573   | cdRNA04-Dia-R3 | cdRNA05-postDia | 0.489036 | 5.9379   | 3.60194  | 5.00E-05 | 0.0289221 |
| WGS | ABySS | XLOC_007270 | 2192126:21143-29573   | cdRNA03-Dia-R2 | cdRNA05-postDia | 0.462253 | 5.9379   | 3.6832   | 5.00E-05 | 0.0289221 |
| WGS | ABySS | XLOC_007531 | 2192977:7579-9568     | cdRNA01-preDia | cdRNA05-postDia | 1.54199  | 19.4423  | 3.65634  | 0.0001   | 0.0499641 |
| WGS | ABySS | XLOC_007531 | 2192977:7579-9568     | cdRNA03-Dia-R2 | cdRNA05-postDia | 1.35251  | 19.4423  | 3.84549  | 5.00E-05 | 0.0289221 |
| WGS | ABySS | XLOC_007569 | 2193085:48763-53452   | cdRNA01-preDia | cdRNA05-postDia | 6.58341  | 40.5686  | 2.62346  | 5.00E-05 | 0.0289221 |
| WGS | ABySS | XLOC_007573 | 2193085:107118-109433 | cdRNA01-preDia | cdRNA04-Dia-R3  | 24.1615  | 163.616  | 2.75953  | 5.00E-05 | 0.0289221 |
| WGS | ABySS | XLOC_007573 | 2193085:107118-109433 | cdRNA01-preDia | cdRNA03-Dia-R2  | 24.1615  | 170.345  | 2.81768  | 5.00E-05 | 0.0289221 |
| WGS | ABySS | XLOC_007573 | 2193085:107118-109433 | cdRNA01-preDia | cdRNA05-postDia | 24.1615  | 184.901  | 2.93598  | 5.00E-05 | 0.0289221 |
| WGS | ABySS | XLOC_007722 | 2193479:1-8176        | cdRNA04-Dia-R3 | cdRNA05-postDia | 542.984  | 77.1333  | -2.81548 | 5.00E-05 | 0.0289221 |
| WGS | ABySS | XLOC_007722 | 2193479:1-8176        | cdRNA03-Dia-R2 | cdRNA05-postDia | 518.928  | 77.1333  | -2.75011 | 5.00E-05 | 0.0289221 |
| WGS | ABySS | XLOC_008241 | 2194876:7280-9318     | cdRNA04-Dia-R3 | cdRNA05-postDia | 1.67243  | 9.29519  | 2.47454  | 0.0001   | 0.0499641 |
| WGS | ABySS | XLOC_008241 | 2194876:7280-9318     | cdRNA02-Dia-R1 | cdRNA05-postDia | 1.58038  | 9.29519  | 2.55621  | 0.0001   | 0.0499641 |
| WGS | ABySS | XLOC_008288 | 2195029:18836-30004   | cdRNA02-Dia-R1 | cdRNA05-postDia | 4.87838  | 20.9619  | 2.1033   | 0.0001   | 0.0499641 |
| WGS | ABySS | XLOC_008525 | 2195825:3717-7624     | cdRNA01-preDia | cdRNA05-postDia | 12.0191  | 57.3034  | 2.25329  | 0.0001   | 0.0499641 |
| WGS | ABySS | XLOC_008647 | 2196137:1512-4555     | cdRNA04-Dia-R3 | cdRNA05-postDia | 1.12646  | 8.2003   | 2.86388  | 5.00E-05 | 0.0289221 |
| WGS | ABySS | XLOC_008833 | 2196718:9751-13684    | cdRNA03-Dia-R2 | cdRNA05-postDia | 1.98331  | 16.3864  | 3.04651  | 5.00E-05 | 0.0289221 |
| WGS | ABySS | XLOC_008833 | 2196718:9751-13684    | cdRNA04-Dia-R3 | cdRNA05-postDia | 1.78273  | 16.3864  | 3.20033  | 5.00E-05 | 0.0289221 |
| WGS | ABySS | XLOC_008861 | 2196767:27669-29035   | cdRNA03-Dia-R2 | cdRNA05-postDia | 5.17899  | 34.8999  | 2.75248  | 5.00E-05 | 0.0289221 |
| WGS | ABySS | XLOC_008910 | 2196832:62195-71282   | cdRNA01-preDia | cdRNA03-Dia-R2  | 5.25019  | 0.870346 | -2.59271 | 5.00E-05 | 0.0289221 |
| WGS | ABySS | XLOC_008910 | 2196832:62195-71282   | cdRNA01-preDia | cdRNA04-Dia-R3  | 5.25019  | 0.957299 | -2.45533 | 5.00E-05 | 0.0289221 |
| WGS | ABySS | XLOC_008910 | 2196832:62195-71282   | cdRNA04-Dia-R3 | cdRNA05-postDia | 0.957299 | 8.73614  | 3.18995  | 5.00E-05 | 0.0289221 |
| WGS | ABySS | XLOC_008910 | 2196832:62195-71282   | cdRNA03-Dia-R2 | cdRNA05-postDia | 0.870346 | 8.73614  | 3.32734  | 5.00E-05 | 0.0289221 |

|     |       |             |                     |                |                 |         |         |           |          |           |
|-----|-------|-------------|---------------------|----------------|-----------------|---------|---------|-----------|----------|-----------|
| WGS | ABySS | XLOC_008942 | 2196946:10802-20446 | cdRNA01-preDia | cdRNA05-postDia | 3.11331 | 40.1745 | 3.68976   | 5.00E-05 | 0.0289221 |
| WGS | ABySS | XLOC_008959 | 2196995:9289-11098  | cdRNA02-Dia-R1 | cdRNA05-postDia | 12.3221 | 61.3109 | 2.3149    | 0.0001   | 0.0499641 |
| WGS | ABySS | XLOC_008959 | 2196995:9289-11098  | cdRNA04-Dia-R3 | cdRNA05-postDia | 11.6191 | 61.3109 | 2.39965   | 5.00E-05 | 0.0289221 |
| WGS | ABySS | XLOC_008959 | 2196995:9289-11098  | cdRNA03-Dia-R2 | cdRNA05-postDia | 10.0378 | 61.3109 | 2.6107    | 5.00E-05 | 0.0289221 |
| WGS | ABySS | XLOC_009089 | 2197451:37901-39426 | cdRNA02-Dia-R1 | cdRNA05-postDia | 10.4256 | 72.9595 | 2.80696   | 5.00E-05 | 0.0289221 |
| WGS | ABySS | XLOC_009089 | 2197451:37901-39426 | cdRNA01-preDia | cdRNA05-postDia | 3.02276 | 72.9595 | 4.59316   | 5.00E-05 | 0.0289221 |
| WGS | ABySS | XLOC_009089 | 2197451:37901-39426 | cdRNA03-Dia-R2 | cdRNA05-postDia | 2.07583 | 72.9595 | 5.13533   | 5.00E-05 | 0.0289221 |
| WGS | ABySS | XLOC_009089 | 2197451:37901-39426 | cdRNA04-Dia-R3 | cdRNA05-postDia | 1.57443 | 72.9595 | 5.53419   | 5.00E-05 | 0.0289221 |
| WGS | ABySS | XLOC_009138 | 2197620:1-1464      | cdRNA02-Dia-R1 | cdRNA05-postDia | 10.7307 | 70.976  | 2.72559   | 5.00E-05 | 0.0289221 |
| WGS | ABySS | XLOC_009138 | 2197620:1-1464      | cdRNA03-Dia-R2 | cdRNA05-postDia | 3.91584 | 70.976  | 4.17994   | 5.00E-05 | 0.0289221 |
| WGS | ABySS | XLOC_009138 | 2197620:1-1464      | cdRNA01-preDia | cdRNA05-postDia | 3.24649 | 70.976  | 4.45038   | 5.00E-05 | 0.0289221 |
| WGS | ABySS | XLOC_009138 | 2197620:1-1464      | cdRNA04-Dia-R3 | cdRNA05-postDia | 3.08602 | 70.976  | 4.52351   | 5.00E-05 | 0.0289221 |
| WGS | ABySS | XLOC_009251 | 2198056:19123-33594 | cdRNA01-preDia | cdRNA04-Dia-R3  | 19.1086 | 100.339 | 2.39259   | 5.00E-05 | 0.0289221 |
| WGS | ABySS | XLOC_009251 | 2198056:19123-33594 | cdRNA01-preDia | cdRNA03-Dia-R2  | 19.1086 | 101.91  | 2.41501   | 5.00E-05 | 0.0289221 |
| WGS | ABySS | XLOC_009251 | 2198056:19123-33594 | cdRNA01-preDia | cdRNA02-Dia-R1  | 19.1086 | 105.262 | 2.46169   | 5.00E-05 | 0.0289221 |
| WGS | ABySS | XLOC_009849 | 2199795:63-5148     | cdRNA01-preDia | cdRNA04-Dia-R3  | 1.31029 | 8.02739 | 2.61504   | 5.00E-05 | 0.0289221 |
| WGS | ABySS | XLOC_009953 | 2200079:653-5516    | cdRNA02-Dia-R2 | cdRNA05-postDia | 2.79588 | 27.6377 | 3.30526   | 5.00E-05 | 0.0289221 |
| WGS | ABySS | XLOC_009953 | 2200079:653-5516    | cdRNA02-Dia-R1 | cdRNA05-postDia | 2.6799  | 27.6377 | 3.36639   | 5.00E-05 | 0.0289221 |
| WGS | ABySS | XLOC_009953 | 2200079:653-5516    | cdRNA04-Dia-R3 | cdRNA05-postDia | 2.40989 | 27.6377 | 3.5196    | 5.00E-05 | 0.0289221 |
| WGS | ABySS | XLOC_010009 | 2200201:2932-7019   | cdRNA01-preDia | cdRNA02-Dia-R1  | 11396.2 | 9852.54 | -0.209991 | 5.00E-05 | 0.0289221 |
| WGS | ABySS | XLOC_010141 | 2200636:4344-5742   | cdRNA03-Dia-R2 | cdRNA05-postDia | 22.6001 | 103.591 | 2.1965    | 5.00E-05 | 0.0289221 |
| WGS | ABySS | XLOC_010141 | 2200636:4344-5742   | cdRNA02-Dia-R1 | cdRNA05-postDia | 15.8677 | 103.591 | 2.70673   | 5.00E-05 | 0.0289221 |
| WGS | ABySS | XLOC_010196 | 2200771:749-4091    | cdRNA01-preDia | cdRNA05-postDia | 6.77884 | 38.7146 | 2.51377   | 5.00E-05 | 0.0289221 |
| WGS | ABySS | XLOC_010196 | 2200771:749-4091    | cdRNA02-Dia-R1 | cdRNA05-postDia | 5.01759 | 38.7146 | 2.94781   | 5.00E-05 | 0.0289221 |
| WGS | ABySS | XLOC_010254 | 2200992:2-3088      | cdRNA02-Dia-R1 | cdRNA05-postDia | 26.5844 | 549.656 | 4.36987   | 5.00E-05 | 0.0289221 |
| WGS | ABySS | XLOC_010254 | 2200992:2-3088      | cdRNA01-preDia | cdRNA05-postDia | 12.8282 | 549.656 | 5.42114   | 5.00E-05 | 0.0289221 |
| WGS | ABySS | XLOC_010254 | 2200992:2-3088      | cdRNA04-Dia-R3 | cdRNA05-postDia | 10.7162 | 549.656 | 5.68066   | 5.00E-05 | 0.0289221 |
| WGS | ABySS | XLOC_010254 | 2200992:2-3088      | cdRNA03-Dia-R2 | cdRNA05-postDia | 9.33328 | 549.656 | 5.88      | 5.00E-05 | 0.0289221 |
| WGS | ABySS | XLOC_010532 | 2201692:2988-5254   | cdRNA02-Dia-R1 | cdRNA03-Dia-R2  | 2.99347 | 24.9748 | 3.06058   | 5.00E-05 | 0.0289221 |
| WGS | ABySS | XLOC_010595 | 2201753:46-5769     | cdRNA01-preDia | cdRNA05-postDia | 14.0385 | 1.55303 | -3.17623  | 5.00E-05 | 0.0289221 |
| WGS | ABySS | XLOC_010809 | 2202357:666-3950    | cdRNA02-Dia-R1 | cdRNA05-postDia | 17.4923 | 106.186 | 2.60179   | 0.0001   | 0.0499641 |
| WGS | ABySS | XLOC_010928 | 2202626:56617-67323 | cdRNA01-preDia | cdRNA04-Dia-R3  | 14.1191 | 96.4474 | 2.77209   | 5.00E-05 | 0.0289221 |
| WGS | ABySS | XLOC_010928 | 2202626:56617-67323 | cdRNA01-preDia | cdRNA03-Dia-R2  | 14.1191 | 103.45  | 2.87322   | 5.00E-05 | 0.0289221 |
| WGS | ABySS | XLOC_011116 | 2203169:0-905       | cdRNA02-Dia-R1 | cdRNA05-postDia | 6.66359 | 53.0336 | 2.99253   | 5.00E-05 | 0.0289221 |
| WGS | ABySS | XLOC_011116 | 2203169:0-905       | cdRNA04-Dia-R3 | cdRNA05-postDia | 5.7461  | 53.0336 | 3.20625   | 5.00E-05 | 0.0289221 |
| WGS | ABySS | XLOC_011116 | 2203169:0-905       | cdRNA03-Dia-R2 | cdRNA05-postDia | 5.55992 | 53.0336 | 3.25377   | 5.00E-05 | 0.0289221 |
| WGS | ABySS | XLOC_011116 | 2203169:0-905       | cdRNA01-preDia | cdRNA05-postDia | 1.59211 | 53.0336 | 5.05789   | 5.00E-05 | 0.0289221 |
| WGS | ABySS | XLOC_011174 | 2203361:2462-6761   | cdRNA01-preDia | cdRNA05-postDia | 5.89527 | 29.8522 | 2.34021   | 5.00E-05 | 0.0289221 |
| WGS | ABySS | XLOC_011174 | 2203361:2462-6761   | cdRNA03-Dia-R2 | cdRNA05-postDia | 5.19804 | 29.8522 | 2.5218    | 0.0001   | 0.0499641 |
| WGS | ABySS | XLOC_011174 | 2203361:2462-6761   | cdRNA04-Dia-R3 | cdRNA05-postDia | 4.58051 | 29.8522 | 2.70426   | 5.00E-05 | 0.0289221 |
| WGS | ABySS | XLOC_011461 | 2204223:0-1779      | cdRNA01-preDia | cdRNA05-postDia | 1.39281 | 13.4572 | 3.2723    | 5.00E-05 | 0.0289221 |
| WGS | ABySS | XLOC_011522 | 2204372:5722-20723  | cdRNA01-preDia | cdRNA05-postDia | 20.0677 | 122.58  | 2.61078   | 5.00E-05 | 0.0289221 |
| WGS | ABySS | XLOC_012336 | 2206993:2-2529      | cdRNA01-preDia | cdRNA05-postDia | 6.48248 | 55.3423 | 3.09376   | 5.00E-05 | 0.0289221 |
| WGS | ABySS | XLOC_012336 | 2206993:2-2529      | cdRNA02-Dia-R1 | cdRNA05-postDia | 3.36102 | 55.3423 | 4.04141   | 5.00E-05 | 0.0289221 |
| WGS | ABySS | XLOC_012336 | 2206993:2-2529      | cdRNA03-Dia-R2 | cdRNA05-postDia | 1.99358 | 55.3423 | 4.79495   | 5.00E-05 | 0.0289221 |
| WGS | ABySS | XLOC_012336 | 2206993:2-2529      | cdRNA04-Dia-R3 | cdRNA05-postDia | 1.66667 | 55.3423 | 5.05334   | 5.00E-05 | 0.0289221 |
| WGS | ABySS | XLOC_012829 | 2208195:0-10345     | cdRNA03-Dia-R2 | cdRNA05-postDia | 33.0256 | 6.97602 | -2.24311  | 0.0001   | 0.0499641 |

|     |       |             |                     |                |                 |          |          |          |          |           |
|-----|-------|-------------|---------------------|----------------|-----------------|----------|----------|----------|----------|-----------|
| WGS | ABySS | XLOC_012829 | 2208195:0-10345     | cdRNA04-Dia-R3 | cdRNA05-postDia | 32.3343  | 6.97602  | -2.21259 | 5.00E-05 | 0.0289221 |
| WGS | ABySS | XLOC_012829 | 2208195:0-10345     | cdRNA01-preDia | cdRNA04-Dia-R3  | 7.73843  | 32.3343  | 2.06295  | 0.0001   | 0.0499641 |
| WGS | ABySS | XLOC_012833 | 2208210:353-5927    | cdRNA02-Dia-R1 | cdRNA05-postDia | 3.32738  | 21.4156  | 2.6862   | 5.00E-05 | 0.0289221 |
| WGS | ABySS | XLOC_013070 | 2208979:17354-21440 | cdRNA04-Dia-R3 | cdRNA05-postDia | 2.08597  | 13.4177  | 2.68535  | 5.00E-05 | 0.0289221 |
| WGS | ABySS | XLOC_013070 | 2208979:17354-21440 | cdRNA03-Dia-R2 | cdRNA05-postDia | 1.92582  | 13.4177  | 2.80059  | 5.00E-05 | 0.0289221 |
| WGS | ABySS | XLOC_013393 | 2209850:1446-7261   | cdRNA02-Dia-R1 | cdRNA04-Dia-R3  | 11.3189  | 1.4325   | -2.98212 | 0.0001   | 0.0499641 |
| WGS | ABySS | XLOC_013393 | 2209850:1446-7261   | cdRNA02-Dia-R1 | cdRNA05-postDia | 11.3189  | 58.7158  | 2.37502  | 0.0001   | 0.0499641 |
| WGS | ABySS | XLOC_013393 | 2209850:1446-7261   | cdRNA03-Dia-R2 | cdRNA05-postDia | 2.53326  | 58.7158  | 4.53468  | 5.00E-05 | 0.0289221 |
| WGS | ABySS | XLOC_013393 | 2209850:1446-7261   | cdRNA01-preDia | cdRNA05-postDia | 2.11777  | 58.7158  | 4.79313  | 5.00E-05 | 0.0289221 |
| WGS | ABySS | XLOC_013393 | 2209850:1446-7261   | cdRNA04-Dia-R3 | cdRNA05-postDia | 1.4325   | 58.7158  | 5.35714  | 5.00E-05 | 0.0289221 |
| WGS | ABySS | XLOC_013884 | 2211151:1186-2108   | cdRNA01-preDia | cdRNA04-Dia-R3  | 15.517   | 91.8069  | 2.56475  | 0.0001   | 0.0499641 |
| WGS | ABySS | XLOC_014000 | 2211574:694-6558    | cdRNA01-preDia | cdRNA05-postDia | 10.0063  | 0.749936 | -3.738   | 5.00E-05 | 0.0289221 |
| WGS | ABySS | XLOC_014000 | 2211574:694-6558    | cdRNA03-Dia-R2 | cdRNA05-postDia | 8.63514  | 0.749936 | -3.52538 | 5.00E-05 | 0.0289221 |
| WGS | ABySS | XLOC_014000 | 2211574:694-6558    | cdRNA04-Dia-R3 | cdRNA05-postDia | 7.85598  | 0.749936 | -3.38895 | 5.00E-05 | 0.0289221 |
| WGS | ABySS | XLOC_014264 | 2212646:9751-10744  | cdRNA02-Dia-R1 | cdRNA05-postDia | 7.34191  | 62.8035  | 3.09662  | 5.00E-05 | 0.0289221 |
| WGS | ABySS | XLOC_014264 | 2212646:9751-10744  | cdRNA03-Dia-R2 | cdRNA05-postDia | 5.37773  | 62.8035  | 3.54578  | 5.00E-05 | 0.0289221 |
| WGS | ABySS | XLOC_014264 | 2212646:9751-10744  | cdRNA04-Dia-R3 | cdRNA05-postDia | 4.59921  | 62.8035  | 3.77139  | 5.00E-05 | 0.0289221 |
| WGS | ABySS | XLOC_014344 | 2212867:7812-9477   | cdRNA03-Dia-R2 | cdRNA05-postDia | 16.4084  | 2.4131   | -2.76547 | 0.0001   | 0.0499641 |
| WGS | ABySS | XLOC_014523 | 2213466:96-12277    | cdRNA01-preDia | cdRNA04-Dia-R3  | 3.01857  | 36.3461  | 3.58986  | 5.00E-05 | 0.0289221 |
| WGS | ABySS | XLOC_014523 | 2213466:96-12277    | cdRNA01-preDia | cdRNA03-Dia-R2  | 3.01857  | 37.5283  | 3.63604  | 0.0001   | 0.0499641 |
| WGS | ABySS | XLOC_014601 | 2213762:2545-5038   | cdRNA01-preDia | cdRNA05-postDia | 5.29637  | 104.096  | 4.29676  | 5.00E-05 | 0.0289221 |
| WGS | ABySS | XLOC_014601 | 2213762:2545-5038   | cdRNA02-Dia-R1 | cdRNA05-postDia | 2.7905   | 104.096  | 5.22124  | 5.00E-05 | 0.0289221 |
| WGS | ABySS | XLOC_014849 | 2214666:2446-4039   | cdRNA03-Dia-R2 | cdRNA05-postDia | 12.1209  | 81.6094  | 2.75124  | 5.00E-05 | 0.0289221 |
| WGS | ABySS | XLOC_014849 | 2214666:2446-4039   | cdRNA04-Dia-R3 | cdRNA05-postDia | 10.6152  | 81.6094  | 2.94261  | 5.00E-05 | 0.0289221 |
| WGS | ABySS | XLOC_014991 | 2215192:3131-4323   | cdRNA04-Dia-R3 | cdRNA05-postDia | 1.27171  | 17.1773  | 3.75566  | 5.00E-05 | 0.0289221 |
| WGS | ABySS | XLOC_014991 | 2215192:3131-4323   | cdRNA03-Dia-R2 | cdRNA05-postDia | 0.781161 | 17.1773  | 4.45874  | 0.0001   | 0.0499641 |
| WGS | ABySS | XLOC_014993 | 2215192:5280-7230   | cdRNA04-Dia-R3 | cdRNA05-postDia | 1.07943  | 12.5751  | 3.54222  | 5.00E-05 | 0.0289221 |
| WGS | ABySS | XLOC_014993 | 2215192:5280-7230   | cdRNA02-Dia-R1 | cdRNA05-postDia | 1.01536  | 12.5751  | 3.63051  | 5.00E-05 | 0.0289221 |
| WGS | ABySS | XLOC_014993 | 2215192:5280-7230   | cdRNA03-Dia-R2 | cdRNA05-postDia | 0.795661 | 12.5751  | 3.98227  | 5.00E-05 | 0.0289221 |
| WGS | ABySS | XLOC_014993 | 2215192:5280-7230   | cdRNA01-preDia | cdRNA05-postDia | 0.529012 | 12.5751  | 4.57113  | 5.00E-05 | 0.0289221 |
| WGS | ABySS | XLOC_015016 | 2215276:0-3524      | cdRNA04-Dia-R3 | cdRNA05-postDia | 77.0342  | 11.4359  | -2.75193 | 5.00E-05 | 0.0289221 |
| WGS | ABySS | XLOC_015016 | 2215276:0-3524      | cdRNA03-Dia-R2 | cdRNA05-postDia | 74.439   | 11.4359  | -2.70248 | 5.00E-05 | 0.0289221 |
| WGS | ABySS | XLOC_015261 | 2216119:11965-15212 | cdRNA01-preDia | cdRNA04-Dia-R3  | 11.6265  | 78.405   | 2.75353  | 5.00E-05 | 0.0289221 |
| WGS | ABySS | XLOC_015261 | 2216119:11965-15212 | cdRNA01-preDia | cdRNA03-Dia-R2  | 11.6265  | 82.678   | 2.83009  | 5.00E-05 | 0.0289221 |
| WGS | ABySS | XLOC_015364 | 2216359:3622-4921   | cdRNA01-preDia | cdRNA04-Dia-R3  | 6.19957  | 35.0242  | 2.49811  | 5.00E-05 | 0.0289221 |
| WGS | ABySS | XLOC_015414 | 2216548:5162-6082   | cdRNA01-preDia | cdRNA05-postDia | 88.2077  | 478.547  | 2.43969  | 5.00E-05 | 0.0289221 |
| WGS | ABySS | XLOC_015635 | 2217310:0-2168      | cdRNA03-Dia-R2 | cdRNA05-postDia | 4.52261  | 25.7636  | 2.51011  | 5.00E-05 | 0.0289221 |
| WGS | ABySS | XLOC_015635 | 2217310:0-2168      | cdRNA04-Dia-R3 | cdRNA05-postDia | 4.50663  | 25.7636  | 2.51521  | 5.00E-05 | 0.0289221 |
| WGS | ABySS | XLOC_015690 | 2217601:1-8717      | cdRNA01-preDia | cdRNA04-Dia-R3  | 13.9454  | 78.7057  | 2.49668  | 5.00E-05 | 0.0289221 |
| WGS | ABySS | XLOC_015690 | 2217601:1-8717      | cdRNA01-preDia | cdRNA03-Dia-R2  | 13.9454  | 79.4138  | 2.5096   | 5.00E-05 | 0.0289221 |
| WGS | ABySS | XLOC_015705 | 2217654:3791-21577  | cdRNA01-preDia | cdRNA05-postDia | 59.6553  | 436.198  | 2.87026  | 5.00E-05 | 0.0289221 |
| WGS | ABySS | XLOC_015705 | 2217654:3791-21577  | cdRNA02-Dia-R1 | cdRNA05-postDia | 44.7914  | 436.198  | 3.28369  | 5.00E-05 | 0.0289221 |
| WGS | ABySS | XLOC_015705 | 2217654:3791-21577  | cdRNA04-Dia-R3 | cdRNA05-postDia | 43.0597  | 436.198  | 3.34057  | 5.00E-05 | 0.0289221 |
| WGS | ABySS | XLOC_015705 | 2217654:3791-21577  | cdRNA03-Dia-R2 | cdRNA05-postDia | 40.3762  | 436.198  | 3.43341  | 5.00E-05 | 0.0289221 |
| WGS | ABySS | XLOC_015718 | 2217726:22383-40190 | cdRNA04-Dia-R3 | cdRNA05-postDia | 2.75538  | 14.6526  | 2.41084  | 0.0001   | 0.0499641 |
| WGS | ABySS | XLOC_015976 | 2218597:1196-6565   | cdRNA03-Dia-R2 | cdRNA05-postDia | 2.29948  | 12.1066  | 2.39642  | 0.0001   | 0.0499641 |
| WGS | ABySS | XLOC_016189 | 2219134:307-548     | cdRNA04-Dia-R3 | cdRNA05-postDia | 138.956  | 797.489  | 2.52083  | 0.0001   | 0.0499641 |

|     |       |             |                     |                |                 |          |         |          |          |           |
|-----|-------|-------------|---------------------|----------------|-----------------|----------|---------|----------|----------|-----------|
| WGS | ABySS | XLOC_016189 | 2219134:307-548     | cdRNA03-Dia-R2 | cdRNA05-postDia | 135.529  | 797.489 | 2.55687  | 5.00E-05 | 0.0289221 |
| WGS | ABySS | XLOC_016190 | 2219135:307-695     | cdRNA04-Dia-R3 | cdRNA05-postDia | 79.4631  | 440.315 | 2.47018  | 5.00E-05 | 0.0289221 |
| WGS | ABySS | XLOC_016322 | 2219409:10524-18130 | cdRNA03-Dia-R2 | cdRNA05-postDia | 2.04906  | 12.7958 | 2.64264  | 5.00E-05 | 0.0289221 |
| WGS | ABySS | XLOC_016322 | 2219409:10524-18130 | cdRNA04-Dia-R3 | cdRNA05-postDia | 2.01401  | 12.7958 | 2.66753  | 5.00E-05 | 0.0289221 |
| WGS | ABySS | XLOC_016419 | 2219636:7422-40368  | cdRNA03-Dia-R2 | cdRNA05-postDia | 1.397    | 15.2786 | 3.45111  | 5.00E-05 | 0.0289221 |
| WGS | ABySS | XLOC_016872 | 2221247:184-3312    | cdRNA03-Dia-R2 | cdRNA05-postDia | 63.1924  | 11.9492 | -2.40283 | 5.00E-05 | 0.0289221 |
| WGS | ABySS | XLOC_016872 | 2221247:184-3312    | cdRNA01-preDia | cdRNA04-Dia-R3  | 11.4217  | 56.5183 | 2.30695  | 0.0001   | 0.0499641 |
| WGS | ABySS | XLOC_016872 | 2221247:184-3312    | cdRNA01-preDia | cdRNA03-Dia-R2  | 11.4217  | 63.1924 | 2.46798  | 5.00E-05 | 0.0289221 |
| WGS | ABySS | XLOC_017020 | 2221707:4175-11977  | cdRNA01-preDia | cdRNA05-postDia | 2.65588  | 19.6632 | 2.88823  | 5.00E-05 | 0.0289221 |
| WGS | ABySS | XLOC_017143 | 2222163:1648-4181   | cdRNA04-Dia-R3 | cdRNA05-postDia | 154.732  | 16.7312 | -3.20915 | 5.00E-05 | 0.0289221 |
| WGS | ABySS | XLOC_017143 | 2222163:1648-4181   | cdRNA03-Dia-R2 | cdRNA05-postDia | 151.691  | 16.7312 | -3.18052 | 5.00E-05 | 0.0289221 |
| WGS | ABySS | XLOC_017197 | 2222307:431-1941    | cdRNA03-Dia-R2 | cdRNA05-postDia | 1.06372  | 9.99377 | 3.23191  | 5.00E-05 | 0.0289221 |
| WGS | ABySS | XLOC_017197 | 2222307:431-1941    | cdRNA02-Dia-R1 | cdRNA05-postDia | 0.991144 | 9.99377 | 3.33386  | 0.0001   | 0.0499641 |
| WGS | ABySS | XLOC_017401 | 2222782:10961-16605 | cdRNA01-preDia | cdRNA03-Dia-R2  | 7.44673  | 40.5591 | 2.44535  | 5.00E-05 | 0.0289221 |
| WGS | ABySS | XLOC_017417 | 2222837:1212-9438   | cdRNA01-preDia | cdRNA05-postDia | 6.86922  | 48.5947 | 2.82258  | 5.00E-05 | 0.0289221 |
| WGS | ABySS | XLOC_017417 | 2222837:1212-9438   | cdRNA01-preDia | cdRNA04-Dia-R3  | 6.86922  | 63.8586 | 3.21666  | 5.00E-05 | 0.0289221 |
| WGS | ABySS | XLOC_017417 | 2222837:1212-9438   | cdRNA01-preDia | cdRNA03-Dia-R2  | 6.86922  | 65.1922 | 3.24648  | 5.00E-05 | 0.0289221 |
| WGS | ABySS | XLOC_017610 | 2223271:24-6540     | cdRNA01-preDia | cdRNA04-Dia-R3  | 9.09325  | 67.7652 | 2.89768  | 5.00E-05 | 0.0289221 |
| WGS | ABySS | XLOC_017610 | 2223271:24-6540     | cdRNA01-preDia | cdRNA03-Dia-R2  | 9.09325  | 70.1223 | 2.94701  | 5.00E-05 | 0.0289221 |
| WGS | ABySS | XLOC_017928 | 2224215:5829-15457  | cdRNA04-Dia-R3 | cdRNA05-postDia | 0.674162 | 3.72135 | 2.46466  | 5.00E-05 | 0.0289221 |
| WGS | ABySS | XLOC_017928 | 2224215:5829-15457  | cdRNA03-Dia-R2 | cdRNA05-postDia | 0.588677 | 3.72135 | 2.66028  | 0.0001   | 0.0499641 |
| WGS | ABySS | XLOC_018062 | 2224578:758-3609    | cdRNA02-Dia-R1 | cdRNA05-postDia | 5.57746  | 41.7589 | 2.9044   | 5.00E-05 | 0.0289221 |
| WGS | ABySS | XLOC_018062 | 2224578:758-3609    | cdRNA01-preDia | cdRNA05-postDia | 2.52254  | 41.7589 | 4.04913  | 5.00E-05 | 0.0289221 |
| WGS | ABySS | XLOC_018062 | 2224578:758-3609    | cdRNA04-Dia-R3 | cdRNA05-postDia | 1.06844  | 41.7589 | 5.28851  | 5.00E-05 | 0.0289221 |
| WGS | ABySS | XLOC_018062 | 2224578:758-3609    | cdRNA03-Dia-R2 | cdRNA05-postDia | 0.733832 | 41.7589 | 5.83049  | 5.00E-05 | 0.0289221 |
| WGS | ABySS | XLOC_018470 | 2225734:11158-15028 | cdRNA01-preDia | cdRNA03-Dia-R2  | 775.246  | 46.4262 | -4.06164 | 5.00E-05 | 0.0289221 |
| WGS | ABySS | XLOC_018470 | 2225734:11158-15028 | cdRNA01-preDia | cdRNA04-Dia-R3  | 775.246  | 50.7304 | -3.93373 | 5.00E-05 | 0.0289221 |
| WGS | ABySS | XLOC_018471 | 2225734:9845-10985  | cdRNA01-preDia | cdRNA03-Dia-R2  | 1805.19  | 106.125 | -4.08832 | 5.00E-05 | 0.0289221 |
| WGS | ABySS | XLOC_018471 | 2225734:9845-10985  | cdRNA01-preDia | cdRNA04-Dia-R3  | 1805.19  | 107.111 | -4.07497 | 5.00E-05 | 0.0289221 |
| WGS | ABySS | XLOC_018768 | 2226515:551-3146    | cdRNA02-Dia-R1 | cdRNA05-postDia | 50.4086  | 285.75  | 2.50301  | 0.0001   | 0.0499641 |
| WGS | ABySS | XLOC_018768 | 2226515:551-3146    | cdRNA04-Dia-R3 | cdRNA05-postDia | 47.0226  | 285.75  | 2.60333  | 0.0001   | 0.0499641 |
| WGS | ABySS | XLOC_018768 | 2226515:551-3146    | cdRNA03-Dia-R2 | cdRNA05-postDia | 46.0453  | 285.75  | 2.63363  | 0.0001   | 0.0499641 |
| WGS | ABySS | XLOC_018818 | 2226711:337-3190    | cdRNA01-preDia | cdRNA05-postDia | 16.5384  | 294.437 | 4.15407  | 5.00E-05 | 0.0289221 |
| WGS | ABySS | XLOC_018818 | 2226711:337-3190    | cdRNA02-Dia-R1 | cdRNA05-postDia | 6.1854   | 294.437 | 5.57295  | 5.00E-05 | 0.0289221 |
| WGS | ABySS | XLOC_018945 | 2227113:1686-5911   | cdRNA01-preDia | cdRNA05-postDia | 23.8546  | 116.076 | 2.28273  | 5.00E-05 | 0.0289221 |
| WGS | ABySS | XLOC_018945 | 2227113:1686-5911   | cdRNA02-Dia-R1 | cdRNA05-postDia | 21.3034  | 116.076 | 2.44591  | 5.00E-05 | 0.0289221 |
| WGS | ABySS | XLOC_019094 | 2227533:3612-7770   | cdRNA04-Dia-R3 | cdRNA05-postDia | 3.16021  | 23.5794 | 2.89944  | 5.00E-05 | 0.0289221 |
| WGS | ABySS | XLOC_019094 | 2227533:3612-7770   | cdRNA03-Dia-R2 | cdRNA05-postDia | 2.5512   | 23.5794 | 3.20828  | 5.00E-05 | 0.0289221 |
| WGS | ABySS | XLOC_019137 | 2227620:0-2747      | cdRNA02-Dia-R1 | cdRNA05-postDia | 6.44014  | 32.4941 | 2.33501  | 0.0001   | 0.0499641 |
| WGS | ABySS | XLOC_019137 | 2227620:0-2747      | cdRNA03-Dia-R2 | cdRNA05-postDia | 5.89185  | 32.4941 | 2.46338  | 0.0001   | 0.0499641 |
| WGS | ABySS | XLOC_019137 | 2227620:0-2747      | cdRNA01-preDia | cdRNA05-postDia | 1.75894  | 32.4941 | 4.2074   | 5.00E-05 | 0.0289221 |
| WGS | ABySS | XLOC_019138 | 2227620:2825-4893   | cdRNA03-Dia-R2 | cdRNA05-postDia | 5.01462  | 29.6524 | 2.56393  | 5.00E-05 | 0.0289221 |
| WGS | ABySS | XLOC_019138 | 2227620:2825-4893   | cdRNA01-preDia | cdRNA05-postDia | 1.75601  | 29.6524 | 4.07777  | 5.00E-05 | 0.0289221 |
| WGS | ABySS | XLOC_019150 | 2227667:62407-72870 | cdRNA01-preDia | cdRNA05-postDia | 1.96368  | 13.7461 | 2.80739  | 5.00E-05 | 0.0289221 |
| WGS | ABySS | XLOC_019303 | 2228007:74-1211     | cdRNA03-Dia-R2 | cdRNA05-postDia | 7.58597  | 65.0461 | 3.10006  | 5.00E-05 | 0.0289221 |
| WGS | ABySS | XLOC_019303 | 2228007:74-1211     | cdRNA04-Dia-R3 | cdRNA05-postDia | 6.71653  | 65.0461 | 3.27567  | 5.00E-05 | 0.0289221 |
| WGS | ABySS | XLOC_019303 | 2228007:74-1211     | cdRNA02-Dia-R1 | cdRNA05-postDia | 6.04432  | 65.0461 | 3.42781  | 5.00E-05 | 0.0289221 |

|     |       |             |                     |                |                 |          |         |          |          |           |
|-----|-------|-------------|---------------------|----------------|-----------------|----------|---------|----------|----------|-----------|
| WGS | ABySS | XLOC_019345 | 2228164:78-1648     | cdRNA01-preDia | cdRNA05-postDia | 34.6834  | 3.07361 | -3.49624 | 5.00E-05 | 0.0289221 |
| WGS | ABySS | XLOC_019345 | 2228164:78-1648     | cdRNA01-preDia | cdRNA02-Dia-R1  | 34.6834  | 5.59704 | -2.63151 | 5.00E-05 | 0.0289221 |
| WGS | ABySS | XLOC_019439 | 2228444:17208-19191 | cdRNA03-Dia-R2 | cdRNA05-postDia | 78.5677  | 8.89376 | -3.14307 | 5.00E-05 | 0.0289221 |
| WGS | ABySS | XLOC_019439 | 2228444:17208-19191 | cdRNA04-Dia-R3 | cdRNA05-postDia | 76.6531  | 8.89376 | -3.10748 | 5.00E-05 | 0.0289221 |
| WGS | ABySS | XLOC_019607 | 2228890:0-2126      | cdRNA01-preDia | cdRNA05-postDia | 2.63837  | 24.2997 | 3.20322  | 5.00E-05 | 0.0289221 |
| WGS | ABySS | XLOC_019695 | 2229153:7977-14222  | cdRNA04-Dia-R3 | cdRNA05-postDia | 78.3115  | 15.2043 | -2.36475 | 5.00E-05 | 0.0289221 |
| WGS | ABySS | XLOC_019695 | 2229153:7977-14222  | cdRNA03-Dia-R2 | cdRNA05-postDia | 75.7021  | 15.2043 | -2.31585 | 0.0001   | 0.0499641 |
| WGS | ABySS | XLOC_019695 | 2229153:7977-14222  | cdRNA01-preDia | cdRNA03-Dia-R2  | 7.17055  | 75.7021 | 3.40018  | 5.00E-05 | 0.0289221 |
| WGS | ABySS | XLOC_019695 | 2229153:7977-14222  | cdRNA01-preDia | cdRNA04-Dia-R3  | 7.17055  | 78.3115 | 3.44907  | 5.00E-05 | 0.0289221 |
| WGS | ABySS | XLOC_019696 | 2229153:19709-24924 | cdRNA04-Dia-R3 | cdRNA05-postDia | 47.1531  | 5.02631 | -3.22978 | 5.00E-05 | 0.0289221 |
| WGS | ABySS | XLOC_019696 | 2229153:19709-24924 | cdRNA03-Dia-R2 | cdRNA05-postDia | 46.6824  | 5.02631 | -3.21531 | 5.00E-05 | 0.0289221 |
| WGS | ABySS | XLOC_019696 | 2229153:19709-24924 | cdRNA02-Dia-R1 | cdRNA03-Dia-R2  | 6.91955  | 46.6824 | 2.75413  | 5.00E-05 | 0.0289221 |
| WGS | ABySS | XLOC_019696 | 2229153:19709-24924 | cdRNA02-Dia-R1 | cdRNA04-Dia-R3  | 6.91955  | 47.1531 | 2.7686   | 5.00E-05 | 0.0289221 |
| WGS | ABySS | XLOC_019696 | 2229153:19709-24924 | cdRNA01-preDia | cdRNA03-Dia-R2  | 1.01853  | 46.6824 | 5.51831  | 5.00E-05 | 0.0289221 |
| WGS | ABySS | XLOC_019696 | 2229153:19709-24924 | cdRNA01-preDia | cdRNA04-Dia-R3  | 1.01853  | 47.1531 | 5.53279  | 5.00E-05 | 0.0289221 |
| WGS | ABySS | XLOC_019870 | 2229548:1756-14554  | cdRNA04-Dia-R3 | cdRNA05-postDia | 1.00144  | 5.60063 | 2.48351  | 5.00E-05 | 0.0289221 |
| WGS | ABySS | XLOC_019870 | 2229548:1756-14554  | cdRNA03-Dia-R2 | cdRNA05-postDia | 0.849448 | 5.60063 | 2.72099  | 5.00E-05 | 0.0289221 |
| WGS | ABySS | XLOC_019996 | 2229912:8642-14234  | cdRNA03-Dia-R2 | cdRNA05-postDia | 4.06158  | 23.7729 | 2.5492   | 0.0001   | 0.0499641 |
| WGS | ABySS | XLOC_019996 | 2229912:8642-14234  | cdRNA01-preDia | cdRNA05-postDia | 3.64767  | 23.7729 | 2.70427  | 5.00E-05 | 0.0289221 |
| WGS | ABySS | XLOC_020585 | 2231772:25467-26352 | cdRNA01-preDia | cdRNA04-Dia-R3  | 178.09   | 12.5101 | -3.83145 | 5.00E-05 | 0.0289221 |
| WGS | ABySS | XLOC_020585 | 2231772:25467-26352 | cdRNA01-preDia | cdRNA03-Dia-R2  | 178.09   | 13.807  | -3.68914 | 5.00E-05 | 0.0289221 |
| WGS | ABySS | XLOC_020585 | 2231772:25467-26352 | cdRNA01-preDia | cdRNA02-Dia-R1  | 178.09   | 20.8314 | -3.09578 | 5.00E-05 | 0.0289221 |
| WGS | ABySS | XLOC_020585 | 2231772:25467-26352 | cdRNA01-preDia | cdRNA05-postDia | 178.09   | 26.866  | -2.72876 | 5.00E-05 | 0.0289221 |
| WGS | ABySS | XLOC_020684 | 2232133:25614-31175 | cdRNA03-Dia-R2 | cdRNA05-postDia | 27.6611  | 128.164 | 2.21206  | 0.0001   | 0.0499641 |
| WGS | ABySS | XLOC_020810 | 2232570:34753-37801 | cdRNA02-Dia-R1 | cdRNA05-postDia | 22.6462  | 125.75  | 2.47322  | 0.0001   | 0.0499641 |
| WGS | ABySS | XLOC_020953 | 2232959:630-3839    | cdRNA03-Dia-R2 | cdRNA05-postDia | 3.81759  | 23.6292 | 2.62983  | 5.00E-05 | 0.0289221 |
| WGS | ABySS | XLOC_020953 | 2232959:630-3839    | cdRNA04-Dia-R3 | cdRNA05-postDia | 3.51787  | 23.6292 | 2.74779  | 5.00E-05 | 0.0289221 |
| WGS | ABySS | XLOC_021015 | 2233122:12030-14540 | cdRNA01-preDia | cdRNA05-postDia | 4.95975  | 28.2702 | 2.51094  | 5.00E-05 | 0.0289221 |
| WGS | ABySS | XLOC_021015 | 2233122:12030-14540 | cdRNA02-Dia-R1 | cdRNA05-postDia | 4.05227  | 28.2702 | 2.80248  | 5.00E-05 | 0.0289221 |
| WGS | ABySS | XLOC_021138 | 2233429:4-574       | cdRNA02-Dia-R1 | cdRNA05-postDia | 7.76518  | 63.4185 | 3.02981  | 5.00E-05 | 0.0289221 |
| WGS | ABySS | XLOC_021138 | 2233429:4-574       | cdRNA04-Dia-R3 | cdRNA05-postDia | 6.05797  | 63.4185 | 3.388    | 5.00E-05 | 0.0289221 |
| WGS | ABySS | XLOC_021138 | 2233429:4-574       | cdRNA03-Dia-R2 | cdRNA05-postDia | 5.37709  | 63.4185 | 3.56001  | 5.00E-05 | 0.0289221 |
| WGS | ABySS | XLOC_021139 | 2233439:7013-44919  | cdRNA01-preDia | cdRNA03-Dia-R2  | 13.712   | 2.28925 | -2.58249 | 0.0001   | 0.0499641 |
| WGS | ABySS | XLOC_021139 | 2233439:7013-44919  | cdRNA01-preDia | cdRNA04-Dia-R3  | 13.712   | 2.47757 | -2.46844 | 5.00E-05 | 0.0289221 |
| WGS | ABySS | XLOC_021386 | 2234068:0-647       | cdRNA03-Dia-R2 | cdRNA05-postDia | 10.2787  | 81.1705 | 2.98129  | 5.00E-05 | 0.0289221 |
| WGS | ABySS | XLOC_021386 | 2234068:0-647       | cdRNA02-Dia-R1 | cdRNA05-postDia | 9.01983  | 81.1705 | 3.16978  | 5.00E-05 | 0.0289221 |
| WGS | ABySS | XLOC_021386 | 2234068:0-647       | cdRNA04-Dia-R3 | cdRNA05-postDia | 8.6754   | 81.1705 | 3.22595  | 5.00E-05 | 0.0289221 |
| WGS | ABySS | XLOC_021386 | 2234068:0-647       | cdRNA01-preDia | cdRNA05-postDia | 6.4286   | 81.1705 | 3.65838  | 5.00E-05 | 0.0289221 |
| WGS | ABySS | XLOC_021426 | 2234249:578-7279    | cdRNA04-Dia-R3 | cdRNA05-postDia | 26.3035  | 5.53075 | -2.24971 | 5.00E-05 | 0.0289221 |
| WGS | ABySS | XLOC_021426 | 2234249:578-7279    | cdRNA03-Dia-R2 | cdRNA05-postDia | 26.0478  | 5.53075 | -2.23561 | 5.00E-05 | 0.0289221 |
| WGS | ABySS | XLOC_021426 | 2234249:578-7279    | cdRNA01-preDia | cdRNA03-Dia-R2  | 5.97128  | 26.0478 | 2.12505  | 5.00E-05 | 0.0289221 |
| WGS | ABySS | XLOC_021426 | 2234249:578-7279    | cdRNA01-preDia | cdRNA04-Dia-R3  | 5.97128  | 26.3035 | 2.13915  | 0.0001   | 0.0499641 |
| WGS | ABySS | XLOC_021960 | 2236156:71442-76436 | cdRNA03-Dia-R2 | cdRNA05-postDia | 16.3265  | 2.1235  | -2.9427  | 5.00E-05 | 0.0289221 |
| WGS | ABySS | XLOC_021960 | 2236156:71442-76436 | cdRNA04-Dia-R3 | cdRNA05-postDia | 16.2648  | 2.1235  | -2.93724 | 5.00E-05 | 0.0289221 |
| WGS | ABySS | XLOC_021961 | 2236156:76521-83822 | cdRNA03-Dia-R2 | cdRNA05-postDia | 12.1559  | 1.74336 | -2.80172 | 5.00E-05 | 0.0289221 |
| WGS | ABySS | XLOC_021961 | 2236156:76521-83822 | cdRNA04-Dia-R3 | cdRNA05-postDia | 12.0073  | 1.74336 | -2.78397 | 5.00E-05 | 0.0289221 |
| WGS | ABySS | XLOC_022053 | 2236455:6-1527      | cdRNA03-Dia-R2 | cdRNA05-postDia | 24.818   | 3.20712 | -2.95204 | 5.00E-05 | 0.0289221 |

|     |       |             |                     |                |                 |          |         |          |          |           |
|-----|-------|-------------|---------------------|----------------|-----------------|----------|---------|----------|----------|-----------|
| WGS | ABySS | XLOC_022053 | 2236455:6-1527      | cdRNA04-Dia-R3 | cdRNA05-postDia | 24.2716  | 3.20712 | -2.91992 | 5.00E-05 | 0.0289221 |
| WGS | ABySS | XLOC_022322 | 2237274:1860-4526   | cdRNA03-Dia-R2 | cdRNA05-postDia | 1.37638  | 12.0753 | 3.1331   | 0.0001   | 0.0499641 |
| WGS | ABySS | XLOC_022322 | 2237274:1860-4526   | cdRNA04-Dia-R3 | cdRNA05-postDia | 1.10149  | 12.0753 | 3.45452  | 0.0001   | 0.0499641 |
| WGS | ABySS | XLOC_022322 | 2237274:1860-4526   | cdRNA02-Dia-R1 | cdRNA05-postDia | 1.09534  | 12.0753 | 3.4626   | 5.00E-05 | 0.0289221 |
| WGS | ABySS | XLOC_022614 | 2238156:7676-12787  | cdRNA04-Dia-R3 | cdRNA05-postDia | 46.2799  | 7.36255 | -2.65211 | 5.00E-05 | 0.0289221 |
| WGS | ABySS | XLOC_022614 | 2238156:7676-12787  | cdRNA03-Dia-R2 | cdRNA05-postDia | 44.6719  | 7.36255 | -2.60109 | 5.00E-05 | 0.0289221 |
| WGS | ABySS | XLOC_022756 | 2238529:987-20061   | cdRNA03-Dia-R2 | cdRNA05-postDia | 69.9431  | 4.60838 | -3.92385 | 5.00E-05 | 0.0289221 |
| WGS | ABySS | XLOC_022756 | 2238529:987-20061   | cdRNA04-Dia-R3 | cdRNA05-postDia | 67.7842  | 4.60838 | -3.87862 | 5.00E-05 | 0.0289221 |
| WGS | ABySS | XLOC_022756 | 2238529:987-20061   | cdRNA02-Dia-R1 | cdRNA05-postDia | 25.3167  | 4.60838 | -2.45775 | 5.00E-05 | 0.0289221 |
| WGS | ABySS | XLOC_022756 | 2238529:987-20061   | cdRNA01-preDia | cdRNA04-Dia-R3  | 10.0026  | 67.7842 | 2.76057  | 5.00E-05 | 0.0289221 |
| WGS | ABySS | XLOC_022756 | 2238529:987-20061   | cdRNA01-preDia | cdRNA03-Dia-R2  | 10.0026  | 69.9431 | 2.8058   | 5.00E-05 | 0.0289221 |
| WGS | ABySS | XLOC_022757 | 2238529:21510-36089 | cdRNA04-Dia-R3 | cdRNA05-postDia | 115.719  | 13.0337 | -3.15031 | 5.00E-05 | 0.0289221 |
| WGS | ABySS | XLOC_022757 | 2238529:21510-36089 | cdRNA03-Dia-R2 | cdRNA05-postDia | 113.321  | 13.0337 | -3.12009 | 5.00E-05 | 0.0289221 |
| WGS | ABySS | XLOC_022757 | 2238529:21510-36089 | cdRNA01-preDia | cdRNA03-Dia-R2  | 13.5261  | 113.321 | 3.0666   | 5.00E-05 | 0.0289221 |
| WGS | ABySS | XLOC_022757 | 2238529:21510-36089 | cdRNA01-preDia | cdRNA04-Dia-R3  | 13.5261  | 115.719 | 3.09682  | 5.00E-05 | 0.0289221 |
| WGS | ABySS | XLOC_023002 | 2239314:972-8371    | cdRNA03-Dia-R2 | cdRNA05-postDia | 45.208   | 9.01375 | -2.32638 | 5.00E-05 | 0.0289221 |
| WGS | ABySS | XLOC_023002 | 2239314:972-8371    | cdRNA04-Dia-R3 | cdRNA05-postDia | 40.6485  | 9.01375 | -2.173   | 5.00E-05 | 0.0289221 |
| WGS | ABySS | XLOC_023109 | 2239659:919-3636    | cdRNA03-Dia-R2 | cdRNA05-postDia | 88.8266  | 6.59009 | -3.75262 | 5.00E-05 | 0.0289221 |
| WGS | ABySS | XLOC_023109 | 2239659:919-3636    | cdRNA04-Dia-R3 | cdRNA05-postDia | 74.335   | 6.59009 | -3.49567 | 5.00E-05 | 0.0289221 |
| WGS | ABySS | XLOC_023390 | 2240588:9258-56876  | cdRNA03-Dia-R2 | cdRNA05-postDia | 4.74872  | 24.1219 | 2.34474  | 5.00E-05 | 0.0289221 |
| WGS | ABySS | XLOC_023390 | 2240588:9258-56876  | cdRNA04-Dia-R3 | cdRNA05-postDia | 4.21122  | 24.1219 | 2.51804  | 5.00E-05 | 0.0289221 |
| WGS | ABySS | XLOC_023572 | 2241176:257-4659    | cdRNA01-preDia | cdRNA05-postDia | 0.984335 | 6.50455 | 2.72423  | 5.00E-05 | 0.0289221 |
| WGS | ABySS | XLOC_023739 | 2241667:38-13000    | cdRNA01-preDia | cdRNA05-postDia | 2.16533  | 9.57522 | 2.14472  | 5.00E-05 | 0.0289221 |
| WGS | ABySS | XLOC_023775 | 2241823:641-10570   | cdRNA03-Dia-R2 | cdRNA05-postDia | 65.6117  | 10.5092 | -2.6423  | 5.00E-05 | 0.0289221 |
| WGS | ABySS | XLOC_023775 | 2241823:641-10570   | cdRNA04-Dia-R3 | cdRNA05-postDia | 59.2796  | 10.5092 | -2.49588 | 0.0001   | 0.0499641 |
| WGS | ABySS | XLOC_023995 | 2242419:44331-47867 | cdRNA03-Dia-R2 | cdRNA05-postDia | 1.7794   | 15.7424 | 3.14519  | 5.00E-05 | 0.0289221 |
| WGS | ABySS | XLOC_024149 | 2242834:5023-7052   | cdRNA04-Dia-R3 | cdRNA05-postDia | 20.6623  | 2.23631 | -3.20781 | 5.00E-05 | 0.0289221 |
| WGS | ABySS | XLOC_024149 | 2242834:5023-7052   | cdRNA03-Dia-R2 | cdRNA05-postDia | 20.3099  | 2.23631 | -3.18299 | 5.00E-05 | 0.0289221 |
| WGS | ABySS | XLOC_024149 | 2242834:5023-7052   | cdRNA01-preDia | cdRNA03-Dia-R2  | 3.83541  | 20.3099 | 2.40473  | 5.00E-05 | 0.0289221 |
| WGS | ABySS | XLOC_024149 | 2242834:5023-7052   | cdRNA01-preDia | cdRNA04-Dia-R3  | 3.83541  | 20.6623 | 2.42955  | 5.00E-05 | 0.0289221 |
| WGS | ABySS | XLOC_024333 | 2243366:612-5476    | cdRNA03-Dia-R2 | cdRNA05-postDia | 158.112  | 28.2112 | -2.48661 | 0.0001   | 0.0499641 |
| WGS | ABySS | XLOC_024505 | 2243867:1074-10112  | cdRNA03-Dia-R2 | cdRNA05-postDia | 15.0057  | 2.67725 | -2.48669 | 5.00E-05 | 0.0289221 |
| WGS | ABySS | XLOC_024589 | 2244198:18333-23702 | cdRNA03-Dia-R2 | cdRNA05-postDia | 18.4384  | 2.51407 | -2.87462 | 5.00E-05 | 0.0289221 |
| WGS | ABySS | XLOC_024589 | 2244198:18333-23702 | cdRNA04-Dia-R3 | cdRNA05-postDia | 17.5278  | 2.51407 | -2.80155 | 5.00E-05 | 0.0289221 |
| WGS | ABySS | XLOC_024591 | 2244215:3974-9781   | cdRNA01-preDia | cdRNA03-Dia-R2  | 1.14402  | 12.374  | 3.43512  | 5.00E-05 | 0.0289221 |
| WGS | ABySS | XLOC_024591 | 2244215:3974-9781   | cdRNA01-preDia | cdRNA04-Dia-R3  | 1.14402  | 13.0009 | 3.50642  | 5.00E-05 | 0.0289221 |
| WGS | ABySS | XLOC_025037 | 2245857:48188-57602 | cdRNA01-preDia | cdRNA05-postDia | 2.96636  | 16.5746 | 2.48221  | 0.0001   | 0.0499641 |
| WGS | ABySS | XLOC_025053 | 2245930:831-4681    | cdRNA03-Dia-R2 | cdRNA05-postDia | 10.8958  | 1.95688 | -2.47715 | 5.00E-05 | 0.0289221 |
| WGS | ABySS | XLOC_025053 | 2245930:831-4681    | cdRNA04-Dia-R3 | cdRNA05-postDia | 10.1907  | 1.95688 | -2.38063 | 5.00E-05 | 0.0289221 |
| WGS | ABySS | XLOC_025316 | 2246858:2440-4390   | cdRNA01-preDia | cdRNA05-postDia | 25.4459  | 175.068 | 2.78241  | 5.00E-05 | 0.0289221 |
| WGS | ABySS | XLOC_025316 | 2246858:2440-4390   | cdRNA04-Dia-R3 | cdRNA05-postDia | 13.7836  | 175.068 | 3.66689  | 5.00E-05 | 0.0289221 |
| WGS | ABySS | XLOC_025316 | 2246858:2440-4390   | cdRNA03-Dia-R2 | cdRNA05-postDia | 12.4702  | 175.068 | 3.81136  | 5.00E-05 | 0.0289221 |
| WGS | ABySS | XLOC_025316 | 2246858:2440-4390   | cdRNA02-Dia-R1 | cdRNA05-postDia | 11.373   | 175.068 | 3.94423  | 5.00E-05 | 0.0289221 |
| WGS | ABySS | XLOC_025317 | 2246858:13-2364     | cdRNA03-Dia-R2 | cdRNA05-postDia | 1.0245   | 10.8999 | 3.41132  | 5.00E-05 | 0.0289221 |
| WGS | ABySS | XLOC_025317 | 2246858:13-2364     | cdRNA04-Dia-R3 | cdRNA05-postDia | 0.929462 | 10.8999 | 3.55178  | 5.00E-05 | 0.0289221 |
| WGS | ABySS | XLOC_025317 | 2246858:13-2364     | cdRNA02-Dia-R1 | cdRNA05-postDia | 0.865039 | 10.8999 | 3.65541  | 0.0001   | 0.0499641 |
| WGS | ABySS | XLOC_025317 | 2246858:13-2364     | cdRNA01-preDia | cdRNA05-postDia | 0.806639 | 10.8999 | 3.75625  | 5.00E-05 | 0.0289221 |

|     |       |             |                     |                |                 |          |         |          |          |           |
|-----|-------|-------------|---------------------|----------------|-----------------|----------|---------|----------|----------|-----------|
| WGS | ABySS | XLOC_025367 | 2246993:0-2379      | cdRNA01-preDia | cdRNA05-postDia | 179.619  | 42.2191 | -2.08897 | 0.0001   | 0.0499641 |
| WGS | ABySS | XLOC_025374 | 2246999:2-4259      | cdRNA04-Dia-R3 | cdRNA05-postDia | 197.982  | 26.8145 | -2.88429 | 5.00E-05 | 0.0289221 |
| WGS | ABySS | XLOC_025374 | 2246999:2-4259      | cdRNA03-Dia-R2 | cdRNA05-postDia | 190.859  | 26.8145 | -2.83142 | 5.00E-05 | 0.0289221 |
| WGS | ABySS | XLOC_025492 | 2247450:51-5020     | cdRNA02-Dia-R1 | cdRNA05-postDia | 16.5566  | 87.0253 | 2.39403  | 0.0001   | 0.0499641 |
| WGS | ABySS | XLOC_025598 | 2247711:24546-34615 | cdRNA02-Dia-R1 | cdRNA05-postDia | 6.73459  | 29.6843 | 2.14004  | 0.0001   | 0.0499641 |
| WGS | ABySS | XLOC_025598 | 2247711:24546-34615 | cdRNA03-Dia-R2 | cdRNA05-postDia | 6.56785  | 29.6843 | 2.1762   | 5.00E-05 | 0.0289221 |
| WGS | ABySS | XLOC_025598 | 2247711:24546-34615 | cdRNA04-Dia-R3 | cdRNA05-postDia | 6.41013  | 29.6843 | 2.21127  | 5.00E-05 | 0.0289221 |
| WGS | ABySS | XLOC_025786 | 2248098:157-1898    | cdRNA01-preDia | cdRNA05-postDia | 3.23008  | 20.8952 | 2.69353  | 5.00E-05 | 0.0289221 |
| WGS | ABySS | XLOC_025786 | 2248098:157-1898    | cdRNA02-Dia-R1 | cdRNA05-postDia | 1.44636  | 20.8952 | 3.85268  | 5.00E-05 | 0.0289221 |
| WGS | ABySS | XLOC_025786 | 2248098:157-1898    | cdRNA04-Dia-R3 | cdRNA05-postDia | 1.00982  | 20.8952 | 4.371    | 5.00E-05 | 0.0289221 |
| WGS | ABySS | XLOC_025786 | 2248098:157-1898    | cdRNA03-Dia-R2 | cdRNA05-postDia | 1.00428  | 20.8952 | 4.37894  | 0.0001   | 0.0499641 |
| WGS | ABySS | XLOC_026487 | 2250591:6674-9087   | cdRNA04-Dia-R3 | cdRNA05-postDia | 37.8246  | 7.59181 | -2.31681 | 0.0001   | 0.0499641 |
| WGS | ABySS | XLOC_026525 | 2250719:0-1111      | cdRNA02-Dia-R1 | cdRNA05-postDia | 4.59171  | 26.3049 | 2.51823  | 5.00E-05 | 0.0289221 |
| WGS | ABySS | XLOC_026525 | 2250719:0-1111      | cdRNA03-Dia-R2 | cdRNA05-postDia | 4.38225  | 26.3049 | 2.58559  | 0.0001   | 0.0499641 |
| WGS | ABySS | XLOC_026525 | 2250719:0-1111      | cdRNA01-preDia | cdRNA05-postDia | 1.10322  | 26.3049 | 4.57554  | 5.00E-05 | 0.0289221 |
| WGS | ABySS | XLOC_026735 | 2251242:26181-30866 | cdRNA03-Dia-R2 | cdRNA05-postDia | 1.2493   | 8.14104 | 2.7041   | 5.00E-05 | 0.0289221 |
| WGS | ABySS | XLOC_026735 | 2251242:26181-30866 | cdRNA02-Dia-R1 | cdRNA05-postDia | 1.09741  | 8.14104 | 2.8911   | 5.00E-05 | 0.0289221 |
| WGS | ABySS | XLOC_026735 | 2251242:26181-30866 | cdRNA01-preDia | cdRNA05-postDia | 0.980819 | 8.14104 | 3.05315  | 5.00E-05 | 0.0289221 |
| WGS | ABySS | XLOC_026778 | 2251375:2610-7025   | cdRNA04-Dia-R3 | cdRNA05-postDia | 1.43872  | 11.5748 | 3.00813  | 5.00E-05 | 0.0289221 |
| WGS | ABySS | XLOC_026778 | 2251375:2610-7025   | cdRNA03-Dia-R2 | cdRNA05-postDia | 1.13019  | 11.5748 | 3.35635  | 5.00E-05 | 0.0289221 |
| WGS | ABySS | XLOC_026778 | 2251375:2610-7025   | cdRNA02-Dia-R1 | cdRNA05-postDia | 1.04137  | 11.5748 | 3.47443  | 5.00E-05 | 0.0289221 |
| WGS | ABySS | XLOC_026964 | 2251878:162-10865   | cdRNA02-Dia-R1 | cdRNA05-postDia | 2.66671  | 15.8762 | 2.57373  | 5.00E-05 | 0.0289221 |
| WGS | ABySS | XLOC_026964 | 2251878:162-10865   | cdRNA03-Dia-R2 | cdRNA05-postDia | 2.03189  | 15.8762 | 2.96597  | 5.00E-05 | 0.0289221 |
| WGS | ABySS | XLOC_026964 | 2251878:162-10865   | cdRNA04-Dia-R3 | cdRNA05-postDia | 2.00676  | 15.8762 | 2.98393  | 5.00E-05 | 0.0289221 |
| WGS | ABySS | XLOC_026975 | 2251893:10222-15441 | cdRNA01-preDia | cdRNA03-Dia-R2  | 41.9225  | 7.42526 | -2.49721 | 5.00E-05 | 0.0289221 |
| WGS | ABySS | XLOC_026975 | 2251893:10222-15441 | cdRNA01-preDia | cdRNA04-Dia-R3  | 41.9225  | 7.76968 | -2.4318  | 5.00E-05 | 0.0289221 |
| WGS | ABySS | XLOC_027039 | 2252018:1588-2558   | cdRNA01-preDia | cdRNA03-Dia-R2  | 21.7045  | 164.583 | 2.92276  | 5.00E-05 | 0.0289221 |
| WGS | ABySS | XLOC_027039 | 2252018:1588-2558   | cdRNA01-preDia | cdRNA04-Dia-R3  | 21.7045  | 166.97  | 2.94352  | 5.00E-05 | 0.0289221 |
| WGS | ABySS | XLOC_027057 | 2252048:21678-29767 | cdRNA03-Dia-R2 | cdRNA05-postDia | 14.3969  | 67.5501 | 2.2302   | 5.00E-05 | 0.0289221 |
| WGS | ABySS | XLOC_027057 | 2252048:21678-29767 | cdRNA02-Dia-R1 | cdRNA05-postDia | 14.0519  | 67.5501 | 2.26519  | 5.00E-05 | 0.0289221 |
| WGS | ABySS | XLOC_027343 | 2253302:1021-5466   | cdRNA04-Dia-R3 | cdRNA05-postDia | 2.68265  | 14.5646 | 2.44074  | 0.0001   | 0.0499641 |
| WGS | ABySS | XLOC_027343 | 2253302:1021-5466   | cdRNA03-Dia-R2 | cdRNA05-postDia | 2.29447  | 14.5646 | 2.66623  | 5.00E-05 | 0.0289221 |
| WGS | ABySS | XLOC_027381 | 2253360:45-3863     | cdRNA01-preDia | cdRNA04-Dia-R3  | 5.98493  | 31.4985 | 2.39588  | 5.00E-05 | 0.0289221 |
| WGS | ABySS | XLOC_027381 | 2253360:45-3863     | cdRNA01-preDia | cdRNA03-Dia-R2  | 5.98493  | 34.3608 | 2.52136  | 0.0001   | 0.0499641 |
| WGS | ABySS | XLOC_028363 | 2256514:6801-14103  | cdRNA01-preDia | cdRNA05-postDia | 39.9726  | 210.415 | 2.39615  | 5.00E-05 | 0.0289221 |
| WGS | ABySS | XLOC_028363 | 2256514:6801-14103  | cdRNA03-Dia-R2 | cdRNA05-postDia | 38.8083  | 210.415 | 2.4388   | 5.00E-05 | 0.0289221 |
| WGS | ABySS | XLOC_028363 | 2256514:6801-14103  | cdRNA04-Dia-R3 | cdRNA05-postDia | 35.2847  | 210.415 | 2.57612  | 5.00E-05 | 0.0289221 |
| WGS | ABySS | XLOC_028637 | 2257279:14800-16988 | cdRNA01-preDia | cdRNA02-Dia-R1  | 1.9381   | 33.6129 | 4.1163   | 0.0001   | 0.0499641 |
| WGS | ABySS | XLOC_028735 | 2257734:0-928       | cdRNA02-Dia-R1 | cdRNA05-postDia | 5.74437  | 76.7947 | 3.74078  | 5.00E-05 | 0.0289221 |
| WGS | ABySS | XLOC_028735 | 2257734:0-928       | cdRNA01-preDia | cdRNA05-postDia | 4.77365  | 76.7947 | 4.00784  | 5.00E-05 | 0.0289221 |
| WGS | ABySS | XLOC_028837 | 2258027:3-6105      | cdRNA02-Dia-R1 | cdRNA05-postDia | 7.78911  | 56.7629 | 2.86542  | 5.00E-05 | 0.0289221 |
| WGS | ABySS | XLOC_028837 | 2258027:3-6105      | cdRNA01-preDia | cdRNA05-postDia | 1.97166  | 56.7629 | 4.84747  | 5.00E-05 | 0.0289221 |
| WGS | ABySS | XLOC_028837 | 2258027:3-6105      | cdRNA04-Dia-R3 | cdRNA05-postDia | 1.35946  | 56.7629 | 5.38385  | 5.00E-05 | 0.0289221 |
| WGS | ABySS | XLOC_028837 | 2258027:3-6105      | cdRNA03-Dia-R2 | cdRNA05-postDia | 1.2544   | 56.7629 | 5.49988  | 5.00E-05 | 0.0289221 |
| WGS | ABySS | XLOC_028859 | 2258082:1-2594      | cdRNA04-Dia-R3 | cdRNA05-postDia | 28.1521  | 173.39  | 2.62271  | 5.00E-05 | 0.0289221 |
| WGS | ABySS | XLOC_028859 | 2258082:1-2594      | cdRNA02-Dia-R1 | cdRNA05-postDia | 25.52    | 173.39  | 2.76432  | 5.00E-05 | 0.0289221 |
| WGS | ABySS | XLOC_028859 | 2258082:1-2594      | cdRNA03-Dia-R2 | cdRNA05-postDia | 24.7868  | 173.39  | 2.80637  | 5.00E-05 | 0.0289221 |



|     |       |             |                     |                |                 |          |          |          |          |           |
|-----|-------|-------------|---------------------|----------------|-----------------|----------|----------|----------|----------|-----------|
| WGS | ABySS | XLOC_028859 | 2258082:1-2594      | cdRNA01-preDia | cdRNA05-postDia | 20.1371  | 173.39   | 3.10609  | 5.00E-05 | 0.0289221 |
| WGS | ABySS | XLOC_028937 | 2258306:4235-5628   | cdRNA03-Dia-R2 | cdRNA05-postDia | 12.0923  | 70.3443  | 2.54035  | 0.0001   | 0.0499641 |
| WGS | ABySS | XLOC_028937 | 2258306:4235-5628   | cdRNA04-Dia-R3 | cdRNA05-postDia | 11.1071  | 70.3443  | 2.66295  | 5.00E-05 | 0.0289221 |
| WGS | ABySS | XLOC_028937 | 2258306:4235-5628   | cdRNA01-preDia | cdRNA05-postDia | 4.4422   | 70.3443  | 3.98509  | 5.00E-05 | 0.0289221 |
| WGS | ABySS | XLOC_028939 | 2258314:207-20087   | cdRNA03-Dia-R2 | cdRNA05-postDia | 5.15342  | 26.7718  | 2.37711  | 0.0001   | 0.0499641 |
| WGS | ABySS | XLOC_029085 | 2258929:3-3557      | cdRNA03-Dia-R2 | cdRNA05-postDia | 5.10923  | 35.6363  | 2.80217  | 5.00E-05 | 0.0289221 |
| WGS | ABySS | XLOC_029085 | 2258929:3-3557      | cdRNA04-Dia-R3 | cdRNA05-postDia | 5.09717  | 35.6363  | 2.80558  | 5.00E-05 | 0.0289221 |
| WGS | ABySS | XLOC_029331 | 2259873:7495-12606  | cdRNA04-Dia-R3 | cdRNA05-postDia | 20.3912  | 2.64168  | -2.94842 | 5.00E-05 | 0.0289221 |
| WGS | ABySS | XLOC_029331 | 2259873:7495-12606  | cdRNA03-Dia-R2 | cdRNA05-postDia | 18.2776  | 2.64168  | -2.79055 | 5.00E-05 | 0.0289221 |
| WGS | ABySS | XLOC_029367 | 2259990:0-1735      | cdRNA02-Dia-R1 | cdRNA05-postDia | 2.06268  | 24.8746  | 3.59208  | 5.00E-05 | 0.0289221 |
| WGS | ABySS | XLOC_029367 | 2259990:0-1735      | cdRNA03-Dia-R2 | cdRNA05-postDia | 1.46036  | 24.8746  | 4.09027  | 5.00E-05 | 0.0289221 |
| WGS | ABySS | XLOC_029459 | 2260170:44004-47366 | cdRNA02-Dia-R1 | cdRNA05-postDia | 2.56521  | 23.9007  | 3.2199   | 5.00E-05 | 0.0289221 |
| WGS | ABySS | XLOC_029459 | 2260170:44004-47366 | cdRNA04-Dia-R3 | cdRNA05-postDia | 2.48551  | 23.9007  | 3.26544  | 5.00E-05 | 0.0289221 |
| WGS | ABySS | XLOC_029459 | 2260170:44004-47366 | cdRNA03-Dia-R2 | cdRNA05-postDia | 2.13207  | 23.9007  | 3.48673  | 5.00E-05 | 0.0289221 |
| WGS | ABySS | XLOC_029482 | 2260205:1162-8164   | cdRNA01-preDia | cdRNA05-postDia | 12.1031  | 0.714582 | -4.08214 | 5.00E-05 | 0.0289221 |
| WGS | ABySS | XLOC_029482 | 2260205:1162-8164   | cdRNA02-Dia-R1 | cdRNA05-postDia | 9.70932  | 0.714582 | -3.7642  | 0.0001   | 0.0499641 |
| WGS | ABySS | XLOC_029694 | 2260850:30736-39095 | cdRNA04-Dia-R3 | cdRNA05-postDia | 8.23867  | 54.8776  | 2.73573  | 5.00E-05 | 0.0289221 |
| WGS | ABySS | XLOC_029694 | 2260850:30736-39095 | cdRNA02-Dia-R1 | cdRNA05-postDia | 7.29836  | 54.8776  | 2.91057  | 5.00E-05 | 0.0289221 |
| WGS | ABySS | XLOC_029694 | 2260850:30736-39095 | cdRNA03-Dia-R2 | cdRNA05-postDia | 6.76987  | 54.8776  | 3.01902  | 5.00E-05 | 0.0289221 |
| WGS | ABySS | XLOC_029800 | 2261089:9171-9628   | cdRNA03-Dia-R2 | cdRNA05-postDia | 163.045  | 20.454   | -2.99482 | 5.00E-05 | 0.0289221 |
| WGS | ABySS | XLOC_029800 | 2261089:9171-9628   | cdRNA04-Dia-R3 | cdRNA05-postDia | 157.598  | 20.454   | -2.94579 | 5.00E-05 | 0.0289221 |
| WGS | ABySS | XLOC_029800 | 2261089:9171-9628   | cdRNA02-Dia-R1 | cdRNA05-postDia | 106.549  | 20.454   | -2.38106 | 0.0001   | 0.0499641 |
| WGS | ABySS | XLOC_030380 | 2262173:10685-16659 | cdRNA03-Dia-R2 | cdRNA05-postDia | 63.0861  | 7.79824  | -3.0161  | 5.00E-05 | 0.0289221 |
| WGS | ABySS | XLOC_030380 | 2262173:10685-16659 | cdRNA04-Dia-R3 | cdRNA05-postDia | 61.1415  | 7.79824  | -2.97093 | 5.00E-05 | 0.0289221 |
| WGS | ABySS | XLOC_030649 | 2262683:18-477      | cdRNA02-Dia-R1 | cdRNA05-postDia | 13.0623  | 314.467  | 4.58943  | 5.00E-05 | 0.0289221 |
| WGS | ABySS | XLOC_030744 | 2262833:612-4441    | cdRNA03-Dia-R2 | cdRNA05-postDia | 37.7962  | 8.01692  | -2.23712 | 5.00E-05 | 0.0289221 |
| WGS | ABySS | XLOC_030744 | 2262833:612-4441    | cdRNA04-Dia-R3 | cdRNA05-postDia | 35.6397  | 8.01692  | -2.15236 | 5.00E-05 | 0.0289221 |
| WGS | ABySS | XLOC_030839 | 2262969:7923-10579  | cdRNA03-Dia-R2 | cdRNA05-postDia | 28.2273  | 2.65298  | -3.41141 | 5.00E-05 | 0.0289221 |
| WGS | ABySS | XLOC_030839 | 2262969:7923-10579  | cdRNA04-Dia-R3 | cdRNA05-postDia | 27.8673  | 2.65298  | -3.39289 | 5.00E-05 | 0.0289221 |
| WGS | ABySS | XLOC_030839 | 2262969:7923-10579  | cdRNA02-Dia-R1 | cdRNA05-postDia | 17.8764  | 2.65298  | -2.75237 | 5.00E-05 | 0.0289221 |
| WGS | ABySS | XLOC_030906 | 2263008:1854-4013   | cdRNA02-Dia-R1 | cdRNA05-postDia | 5.5432   | 26.4832  | 2.25629  | 0.0001   | 0.0499641 |
| WGS | ABySS | XLOC_031015 | 2263059:49855-53435 | cdRNA01-preDia | cdRNA05-postDia | 5.09516  | 32.8224  | 2.68748  | 0.0001   | 0.0499641 |
| WGS | ABySS | XLOC_031015 | 2263059:49855-53435 | cdRNA02-Dia-R1 | cdRNA05-postDia | 3.36276  | 32.8224  | 3.28697  | 5.00E-05 | 0.0289221 |
| WGS | ABySS | XLOC_031051 | 2263079:19533-21237 | cdRNA03-Dia-R2 | cdRNA05-postDia | 3.87786  | 21.2456  | 2.45383  | 0.0001   | 0.0499641 |
| WGS | ABySS | XLOC_031051 | 2263079:19533-21237 | cdRNA02-Dia-R1 | cdRNA05-postDia | 2.85562  | 21.2456  | 2.89529  | 5.00E-05 | 0.0289221 |
| WGS | ABySS | XLOC_031051 | 2263079:19533-21237 | cdRNA01-preDia | cdRNA05-postDia | 1.84624  | 21.2456  | 3.5245   | 5.00E-05 | 0.0289221 |
| WGS | ABySS | XLOC_031558 | 2263355:475-8784    | cdRNA03-Dia-R2 | cdRNA05-postDia | 18.8226  | 2.93476  | -2.68115 | 0.0001   | 0.0499641 |
| WGS | ABySS | XLOC_031711 | 2263443:565-3451    | cdRNA03-Dia-R2 | cdRNA05-postDia | 12.495   | 1.73758  | -2.8462  | 5.00E-05 | 0.0289221 |
| WGS | ABySS | XLOC_031711 | 2263443:565-3451    | cdRNA04-Dia-R3 | cdRNA05-postDia | 11.4516  | 1.73758  | -2.7204  | 5.00E-05 | 0.0289221 |
| WGS | ABySS | XLOC_031745 | 2263447:2466-6621   | cdRNA01-preDia | cdRNA05-postDia | 20.4821  | 134.202  | 2.71197  | 5.00E-05 | 0.0289221 |
| WGS | ABySS | XLOC_031745 | 2263447:2466-6621   | cdRNA04-Dia-R3 | cdRNA05-postDia | 18.5812  | 134.202  | 2.85249  | 5.00E-05 | 0.0289221 |
| WGS | ABySS | XLOC_031745 | 2263447:2466-6621   | cdRNA03-Dia-R2 | cdRNA05-postDia | 17.7984  | 134.202  | 2.91458  | 5.00E-05 | 0.0289221 |
| WGS | ABySS | XLOC_031745 | 2263447:2466-6621   | cdRNA02-Dia-R1 | cdRNA05-postDia | 14.807   | 134.202  | 3.18005  | 5.00E-05 | 0.0289221 |
| WGS | ABySS | XLOC_031797 | 2263468:6703-8575   | cdRNA02-Dia-R1 | cdRNA05-postDia | 0.624207 | 9.71835  | 3.96062  | 0.0001   | 0.0499641 |
| WGS | ABySS | XLOC_032093 | 2263628:4665-8143   | cdRNA02-Dia-R1 | cdRNA05-postDia | 11.8163  | 67.9495  | 2.52369  | 0.0001   | 0.0499641 |
| WGS | ABySS | XLOC_032093 | 2263628:4665-8143   | cdRNA01-preDia | cdRNA05-postDia | 4.81928  | 67.9495  | 3.81757  | 5.00E-05 | 0.0289221 |
| WGS | ABySS | XLOC_032093 | 2263628:4665-8143   | cdRNA03-Dia-R2 | cdRNA05-postDia | 3.29896  | 67.9495  | 4.36438  | 5.00E-05 | 0.0289221 |

|     |       |             |                       |                |                 |         |         |          |          |           |
|-----|-------|-------------|-----------------------|----------------|-----------------|---------|---------|----------|----------|-----------|
| WGS | ABySS | XLOC_032093 | 2263628:4665-8143     | cdRNA04-Dia-R3 | cdRNA05-postDia | 2.85743 | 67.9495 | 4.57167  | 5.00E-05 | 0.0289221 |
| WGS | ABySS | XLOC_032268 | 2263751:67554-67800   | cdRNA01-preDia | cdRNA04-Dia-R3  | 26.158  | 276.953 | 3.40432  | 5.00E-05 | 0.0289221 |
| WGS | ABySS | XLOC_032268 | 2263751:67554-67800   | cdRNA01-preDia | cdRNA03-Dia-R2  | 26.158  | 283.684 | 3.43896  | 5.00E-05 | 0.0289221 |
| WGS | ABySS | XLOC_032284 | 2263769:2076-6207     | cdRNA01-preDia | cdRNA05-postDia | 2.48326 | 16.6589 | 2.74599  | 5.00E-05 | 0.0289221 |
| WGS | ABySS | XLOC_032284 | 2263769:2076-6207     | cdRNA02-Dia-R1 | cdRNA05-postDia | 2.37424 | 16.6589 | 2.81075  | 5.00E-05 | 0.0289221 |
| WGS | ABySS | XLOC_032284 | 2263769:2076-6207     | cdRNA03-Dia-R2 | cdRNA05-postDia | 1.6635  | 16.6589 | 3.324    | 5.00E-05 | 0.0289221 |
| WGS | ABySS | XLOC_032284 | 2263769:2076-6207     | cdRNA04-Dia-R3 | cdRNA05-postDia | 1.20363 | 16.6589 | 3.79083  | 5.00E-05 | 0.0289221 |
| WGS | ABySS | XLOC_032621 | 2263942:17841-23395   | cdRNA03-Dia-R2 | cdRNA05-postDia | 1.2142  | 9.29932 | 2.93712  | 0.0001   | 0.0499641 |
| WGS | ABySS | XLOC_032635 | 2263946:91444-93686   | cdRNA01-preDia | cdRNA03-Dia-R2  | 2.81372 | 17.0794 | 2.60171  | 5.00E-05 | 0.0289221 |
| WGS | ABySS | XLOC_032776 | 2264005:61942-62283   | cdRNA01-preDia | cdRNA03-Dia-R2  | 494.935 | 74.0496 | -2.74067 | 5.00E-05 | 0.0289221 |
| WGS | ABySS | XLOC_032776 | 2264005:61942-62283   | cdRNA01-preDia | cdRNA04-Dia-R3  | 494.935 | 74.9263 | -2.72369 | 5.00E-05 | 0.0289221 |
| WGS | ABySS | XLOC_032776 | 2264005:61942-62283   | cdRNA01-preDia | cdRNA05-postDia | 494.935 | 103.328 | -2.26001 | 0.0001   | 0.0499641 |
| WGS | ABySS | XLOC_032801 | 2264026:2643-4742     | cdRNA01-preDia | cdRNA03-Dia-R2  | 19.5843 | 103.83  | 2.40646  | 5.00E-05 | 0.0289221 |
| WGS | ABySS | XLOC_032801 | 2264026:2643-4742     | cdRNA01-preDia | cdRNA04-Dia-R3  | 19.5843 | 111.857 | 2.51388  | 5.00E-05 | 0.0289221 |
| WGS | ABySS | XLOC_032938 | 2264098:18747-24820   | cdRNA01-preDia | cdRNA04-Dia-R3  | 19.194  | 2.26132 | -3.08542 | 5.00E-05 | 0.0289221 |
| WGS | ABySS | XLOC_032938 | 2264098:18747-24820   | cdRNA01-preDia | cdRNA03-Dia-R2  | 19.194  | 2.55454 | -2.90952 | 5.00E-05 | 0.0289221 |
| WGS | ABySS | XLOC_032965 | 2264118:79267-82688   | cdRNA03-Dia-R2 | cdRNA05-postDia | 5.48189 | 32.1243 | 2.55092  | 5.00E-05 | 0.0289221 |
| WGS | ABySS | XLOC_032965 | 2264118:79267-82688   | cdRNA04-Dia-R3 | cdRNA05-postDia | 4.85665 | 32.1243 | 2.72563  | 5.00E-05 | 0.0289221 |
| WGS | ABySS | XLOC_033279 | 2264334:4450-9051     | cdRNA01-preDia | cdRNA02-Dia-R1  | 20.5522 | 179.379 | 3.12565  | 5.00E-05 | 0.0289221 |
| WGS | ABySS | XLOC_033279 | 2264334:4450-9051     | cdRNA01-preDia | cdRNA05-postDia | 20.5522 | 392.366 | 4.25484  | 5.00E-05 | 0.0289221 |
| WGS | ABySS | XLOC_033308 | 2264357:983-8423      | cdRNA01-preDia | cdRNA02-Dia-R1  | 4.92316 | 28.3716 | 2.52679  | 0.0001   | 0.0499641 |
| WGS | ABySS | XLOC_033308 | 2264357:983-8423      | cdRNA01-preDia | cdRNA05-postDia | 4.92316 | 48.1814 | 3.29082  | 5.00E-05 | 0.0289221 |
| WGS | ABySS | XLOC_033372 | 2264416:9920-18630    | cdRNA04-Dia-R3 | cdRNA05-postDia | 3.35546 | 18.0399 | 2.42661  | 5.00E-05 | 0.0289221 |
| WGS | ABySS | XLOC_033372 | 2264416:9920-18630    | cdRNA03-Dia-R2 | cdRNA05-postDia | 3.18895 | 18.0399 | 2.50004  | 5.00E-05 | 0.0289221 |
| WGS | ABySS | XLOC_033474 | 2264445:103395-104680 | cdRNA01-preDia | cdRNA05-postDia | 29.2015 | 4.37236 | -2.73956 | 5.00E-05 | 0.0289221 |
| WGS | ABySS | XLOC_033545 | 2264474:6-1563        | cdRNA04-Dia-R3 | cdRNA05-postDia | 2.37624 | 15.5246 | 2.7078   | 5.00E-05 | 0.0289221 |
| WGS | ABySS | XLOC_033545 | 2264474:6-1563        | cdRNA03-Dia-R2 | cdRNA05-postDia | 1.93946 | 15.5246 | 3.00083  | 5.00E-05 | 0.0289221 |
| WGS | ABySS | XLOC_034062 | 2264765:24308-29686   | cdRNA02-Dia-R1 | cdRNA05-postDia | 13.5274 | 70.9792 | 2.39152  | 5.00E-05 | 0.0289221 |
| WGS | ABySS | XLOC_034062 | 2264765:24308-29686   | cdRNA04-Dia-R3 | cdRNA05-postDia | 13.2348 | 70.9792 | 2.42306  | 5.00E-05 | 0.0289221 |
| WGS | ABySS | XLOC_034062 | 2264765:24308-29686   | cdRNA03-Dia-R2 | cdRNA05-postDia | 13.1781 | 70.9792 | 2.42925  | 5.00E-05 | 0.0289221 |
| WGS | ABySS | XLOC_034062 | 2264765:24308-29686   | cdRNA01-preDia | cdRNA05-postDia | 8.65433 | 70.9792 | 3.0359   | 5.00E-05 | 0.0289221 |
| WGS | ABySS | XLOC_034088 | 2264777:222-4487      | cdRNA01-preDia | cdRNA05-postDia | 1.73915 | 14.0273 | 3.01178  | 5.00E-05 | 0.0289221 |
| WGS | ABySS | XLOC_034088 | 2264777:222-4487      | cdRNA04-Dia-R3 | cdRNA05-postDia | 1.2347  | 14.0273 | 3.506    | 5.00E-05 | 0.0289221 |
| WGS | ABySS | XLOC_034214 | 2264850:494-2003      | cdRNA02-Dia-R1 | cdRNA05-postDia | 2.43663 | 14.3461 | 2.55769  | 0.0001   | 0.0499641 |
| WGS | ABySS | XLOC_034214 | 2264850:494-2003      | cdRNA03-Dia-R2 | cdRNA05-postDia | 2.15865 | 14.3461 | 2.73246  | 5.00E-05 | 0.0289221 |
| WGS | ABySS | XLOC_034280 | 2264899:34142-50664   | cdRNA03-Dia-R2 | cdRNA05-postDia | 4.88614 | 35.0264 | 2.84167  | 5.00E-05 | 0.0289221 |
| WGS | ABySS | XLOC_034280 | 2264899:34142-50664   | cdRNA04-Dia-R3 | cdRNA05-postDia | 4.63576 | 35.0264 | 2.91756  | 5.00E-05 | 0.0289221 |
| WGS | ABySS | XLOC_034364 | 2264934:97618-107162  | cdRNA03-Dia-R2 | cdRNA05-postDia | 16.3004 | 92.2487 | 2.50062  | 5.00E-05 | 0.0289221 |
| WGS | ABySS | XLOC_034420 | 2264968:17473-19441   | cdRNA01-preDia | cdRNA05-postDia | 65.7143 | 12.6146 | -2.38111 | 5.00E-05 | 0.0289221 |
| WGS | ABySS | XLOC_034499 | 2265014:5773-9215     | cdRNA01-preDia | cdRNA03-Dia-R2  | 52.4695 | 10.063  | -2.38242 | 0.0001   | 0.0499641 |
| WGS | ABySS | XLOC_034499 | 2265014:5773-9215     | cdRNA01-preDia | cdRNA04-Dia-R3  | 52.4695 | 10.6218 | -2.30445 | 0.0001   | 0.0499641 |
| WGS | ABySS | XLOC_034501 | 2265016:12841-15377   | cdRNA03-Dia-R2 | cdRNA05-postDia | 16.4469 | 2.44472 | -2.75007 | 5.00E-05 | 0.0289221 |
| WGS | ABySS | XLOC_034501 | 2265016:12841-15377   | cdRNA04-Dia-R3 | cdRNA05-postDia | 15.3968 | 2.44472 | -2.65489 | 0.0001   | 0.0499641 |
| WGS | ABySS | XLOC_034675 | 2265119:34053-36972   | cdRNA01-preDia | cdRNA03-Dia-R2  | 22.5418 | 138.918 | 2.62356  | 5.00E-05 | 0.0289221 |
| WGS | ABySS | XLOC_034675 | 2265119:34053-36972   | cdRNA01-preDia | cdRNA04-Dia-R3  | 22.5418 | 147.474 | 2.70978  | 5.00E-05 | 0.0289221 |
| WGS | ABySS | XLOC_034675 | 2265119:34053-36972   | cdRNA01-preDia | cdRNA05-postDia | 22.5418 | 153.376 | 2.7664   | 5.00E-05 | 0.0289221 |
| WGS | ABySS | XLOC_034761 | 2265176:108504-113134 | cdRNA01-preDia | cdRNA05-postDia | 2.20996 | 14.9165 | 2.75482  | 0.0001   | 0.0499641 |

|     |       |             |                     |                |                 |          |          |          |          |           |
|-----|-------|-------------|---------------------|----------------|-----------------|----------|----------|----------|----------|-----------|
| WGS | ABySS | XLOC_035364 | 2265546:72-3248     | cdRNA01-preDia | cdRNA03-Dia-R2  | 9.29533  | 58.705   | 2.65891  | 5.00E-05 | 0.0289221 |
| WGS | ABySS | XLOC_035364 | 2265546:72-3248     | cdRNA01-preDia | cdRNA04-Dia-R3  | 9.29533  | 59.0667  | 2.66777  | 5.00E-05 | 0.0289221 |
| WGS | ABySS | XLOC_035433 | 2265576:17981-20986 | cdRNA02-Dia-R1 | cdRNA05-postDia | 3.57583  | 19.5519  | 2.45096  | 0.0001   | 0.0499641 |
| WGS | ABySS | XLOC_035433 | 2265576:17981-20986 | cdRNA03-Dia-R2 | cdRNA05-postDia | 3.02119  | 19.5519  | 2.69412  | 5.00E-05 | 0.0289221 |
| WGS | ABySS | XLOC_035450 | 2265584:2277-7129   | cdRNA03-Dia-R2 | cdRNA05-postDia | 69.4688  | 8.4617   | -3.03735 | 5.00E-05 | 0.0289221 |
| WGS | ABySS | XLOC_035450 | 2265584:2277-7129   | cdRNA04-Dia-R3 | cdRNA05-postDia | 65.2805  | 8.4617   | -2.94763 | 5.00E-05 | 0.0289221 |
| WGS | ABySS | XLOC_035576 | 2265649:4389-7435   | cdRNA01-preDia | cdRNA05-postDia | 2.99411  | 18.2355  | 2.60655  | 0.0001   | 0.0499641 |
| WGS | ABySS | XLOC_035576 | 2265649:4389-7435   | cdRNA04-Dia-R3 | cdRNA05-postDia | 2.66868  | 18.2355  | 2.77255  | 0.0001   | 0.0499641 |
| WGS | ABySS | XLOC_035576 | 2265649:4389-7435   | cdRNA03-Dia-R2 | cdRNA05-postDia | 2.37358  | 18.2355  | 2.94161  | 5.00E-05 | 0.0289221 |
| WGS | ABySS | XLOC_036116 | 2265922:164-752     | cdRNA02-Dia-R1 | cdRNA05-postDia | 26.7922  | 227.925  | 3.08867  | 5.00E-05 | 0.0289221 |
| WGS | ABySS | XLOC_036116 | 2265922:164-752     | cdRNA01-preDia | cdRNA05-postDia | 10.0387  | 227.925  | 4.50491  | 5.00E-05 | 0.0289221 |
| WGS | ABySS | XLOC_036116 | 2265922:164-752     | cdRNA03-Dia-R2 | cdRNA05-postDia | 9.00253  | 227.925  | 4.66209  | 5.00E-05 | 0.0289221 |
| WGS | ABySS | XLOC_036116 | 2265922:164-752     | cdRNA04-Dia-R3 | cdRNA05-postDia | 6.75451  | 227.925  | 5.07656  | 5.00E-05 | 0.0289221 |
| WGS | ABySS | XLOC_036228 | 2265978:792-5388    | cdRNA01-preDia | cdRNA05-postDia | 2.15047  | 15.4759  | 2.8473   | 0.0001   | 0.0499641 |
| WGS | ABySS | XLOC_036716 | 2266223:19796-23485 | cdRNA01-preDia | cdRNA05-postDia | 21.6184  | 1.39918  | -3.94961 | 5.00E-05 | 0.0289221 |
| WGS | ABySS | XLOC_036716 | 2266223:19796-23485 | cdRNA02-Dia-R1 | cdRNA05-postDia | 18.5189  | 1.39918  | -3.72635 | 5.00E-05 | 0.0289221 |
| WGS | ABySS | XLOC_036716 | 2266223:19796-23485 | cdRNA03-Dia-R2 | cdRNA05-postDia | 15.9902  | 1.39918  | -3.51454 | 0.0001   | 0.0499641 |
| WGS | ABySS | XLOC_036716 | 2266223:19796-23485 | cdRNA04-Dia-R3 | cdRNA05-postDia | 15.0004  | 1.39918  | -3.42235 | 0.0001   | 0.0499641 |
| WGS | ABySS | XLOC_036859 | 2266277:43852-46094 | cdRNA01-preDia | cdRNA05-postDia | 22.7556  | 117.642  | 2.37011  | 5.00E-05 | 0.0289221 |
| WGS | ABySS | XLOC_036930 | 2266309:328-2642    | cdRNA01-preDia | cdRNA05-postDia | 7.89778  | 142.299  | 4.17134  | 5.00E-05 | 0.0289221 |
| WGS | ABySS | XLOC_036930 | 2266309:328-2642    | cdRNA02-Dia-R1 | cdRNA05-postDia | 6.05842  | 142.299  | 4.55384  | 5.00E-05 | 0.0289221 |
| WGS | ABySS | XLOC_036930 | 2266309:328-2642    | cdRNA04-Dia-R3 | cdRNA05-postDia | 1.12584  | 142.299  | 6.98178  | 5.00E-05 | 0.0289221 |
| WGS | ABySS | XLOC_036930 | 2266309:328-2642    | cdRNA03-Dia-R2 | cdRNA05-postDia | 0.952582 | 142.299  | 7.22287  | 5.00E-05 | 0.0289221 |
| WGS | ABySS | XLOC_037689 | 2266757:7164-11952  | cdRNA01-preDia | cdRNA03-Dia-R2  | 10.7517  | 67.5815  | 2.65207  | 5.00E-05 | 0.0289221 |
| WGS | ABySS | XLOC_037689 | 2266757:7164-11952  | cdRNA01-preDia | cdRNA04-Dia-R3  | 10.7517  | 70.2286  | 2.7075   | 5.00E-05 | 0.0289221 |
| WGS | ABySS | XLOC_037689 | 2266757:7164-11952  | cdRNA01-preDia | cdRNA02-Dia-R1  | 10.7517  | 127.069  | 3.56298  | 5.00E-05 | 0.0289221 |
| WGS | ABySS | XLOC_037689 | 2266757:7164-11952  | cdRNA01-preDia | cdRNA05-postDia | 10.7517  | 361.499  | 5.07136  | 5.00E-05 | 0.0289221 |
| WGS | ABySS | XLOC_037799 | 2266834:62972-65212 | cdRNA04-Dia-R3 | cdRNA05-postDia | 16.827   | 95.6279  | 2.50666  | 5.00E-05 | 0.0289221 |
| WGS | ABySS | XLOC_037799 | 2266834:62972-65212 | cdRNA03-Dia-R2 | cdRNA05-postDia | 16.7624  | 95.6279  | 2.5122   | 5.00E-05 | 0.0289221 |
| WGS | ABySS | XLOC_037928 | 2266917:1310-9192   | cdRNA01-preDia | cdRNA04-Dia-R3  | 44.1687  | 9.73045  | -2.18244 | 5.00E-05 | 0.0289221 |
| WGS | ABySS | XLOC_038554 | 2267230:1237-2667   | cdRNA02-Dia-R1 | cdRNA05-postDia | 3.32276  | 46.9186  | 3.81971  | 5.00E-05 | 0.0289221 |
| WGS | ABySS | XLOC_038569 | 2267243:20-1258     | cdRNA04-Dia-R3 | cdRNA05-postDia | 21.4948  | 107.922  | 2.32793  | 0.0001   | 0.0499641 |
| WGS | ABySS | XLOC_038594 | 2267262:1928-17581  | cdRNA01-preDia | cdRNA03-Dia-R2  | 13.6713  | 67.7652  | 2.30939  | 0.0001   | 0.0499641 |
| WGS | ABySS | XLOC_038646 | 2267283:76764-92773 | cdRNA01-preDia | cdRNA03-Dia-R2  | 9.72071  | 40.8858  | 2.07247  | 0.0001   | 0.0499641 |
| WGS | ABySS | XLOC_038874 | 2267363:4257-12620  | cdRNA01-preDia | cdRNA03-Dia-R2  | 4.59044  | 27.515   | 2.58351  | 5.00E-05 | 0.0289221 |
| WGS | ABySS | XLOC_038874 | 2267363:4257-12620  | cdRNA01-preDia | cdRNA04-Dia-R3  | 4.59044  | 28.9208  | 2.6554   | 5.00E-05 | 0.0289221 |
| WGS | ABySS | XLOC_038993 | 2267404:5132-8193   | cdRNA01-preDia | cdRNA02-Dia-R1  | 22.6264  | 0.883876 | -4.67802 | 0.0001   | 0.0499641 |
| WGS | ABySS | XLOC_038994 | 2267404:8455-10144  | cdRNA01-preDia | cdRNA02-Dia-R1  | 20.3201  | 0.989722 | -4.35974 | 5.00E-05 | 0.0289221 |
| WGS | ABySS | XLOC_039016 | 2267417:4538-8535   | cdRNA01-preDia | cdRNA05-postDia | 1.93318  | 21.5921  | 3.48146  | 5.00E-05 | 0.0289221 |
| WGS | ABySS | XLOC_039111 | 2267469:20893-22694 | cdRNA01-preDia | cdRNA03-Dia-R2  | 23.2205  | 2.73717  | -3.08464 | 5.00E-05 | 0.0289221 |
| WGS | ABySS | XLOC_039111 | 2267469:20893-22694 | cdRNA01-preDia | cdRNA04-Dia-R3  | 23.2205  | 2.77063  | -3.06711 | 5.00E-05 | 0.0289221 |
| WGS | ABySS | XLOC_039111 | 2267469:20893-22694 | cdRNA04-Dia-R3 | cdRNA05-postDia | 2.77063  | 22.8726  | 3.04533  | 5.00E-05 | 0.0289221 |
| WGS | ABySS | XLOC_039111 | 2267469:20893-22694 | cdRNA03-Dia-R2 | cdRNA05-postDia | 2.73717  | 22.8726  | 3.06286  | 5.00E-05 | 0.0289221 |
| WGS | ABySS | XLOC_039760 | 2267740:3211-8111   | cdRNA03-Dia-R2 | cdRNA05-postDia | 59.5896  | 609.283  | 3.35398  | 5.00E-05 | 0.0289221 |
| WGS | ABySS | XLOC_039760 | 2267740:3211-8111   | cdRNA04-Dia-R3 | cdRNA05-postDia | 57.7154  | 609.283  | 3.40009  | 5.00E-05 | 0.0289221 |
| WGS | ABySS | XLOC_039760 | 2267740:3211-8111   | cdRNA01-preDia | cdRNA05-postDia | 22.8397  | 609.283  | 4.7375   | 5.00E-05 | 0.0289221 |
| WGS | ABySS | XLOC_039761 | 2267740:13870-18009 | cdRNA01-preDia | cdRNA05-postDia | 54.1692  | 338.535  | 2.64376  | 5.00E-05 | 0.0289221 |

|     |       |             |                       |                |                 |          |         |          |          |           |
|-----|-------|-------------|-----------------------|----------------|-----------------|----------|---------|----------|----------|-----------|
| WGS | ABySS | XLOC_039964 | 2267857:16451-19969   | cdRNA01-preDia | cdRNA05-postDia | 2.64309  | 15.1345 | 2.51754  | 0.0001   | 0.0499641 |
| WGS | ABySS | XLOC_039964 | 2267857:16451-19969   | cdRNA01-preDia | cdRNA02-Dia-R1  | 2.64309  | 16.2855 | 2.62329  | 5.00E-05 | 0.0289221 |
| WGS | ABySS | XLOC_040168 | 2267953:4239-10848    | cdRNA02-Dia-R1 | cdRNA05-postDia | 13.8392  | 82.1932 | 2.57026  | 5.00E-05 | 0.0289221 |
| WGS | ABySS | XLOC_040168 | 2267953:4239-10848    | cdRNA03-Dia-R2 | cdRNA05-postDia | 11.5818  | 82.1932 | 2.82716  | 5.00E-05 | 0.0289221 |
| WGS | ABySS | XLOC_040168 | 2267953:4239-10848    | cdRNA04-Dia-R3 | cdRNA05-postDia | 11.4946  | 82.1932 | 2.83806  | 5.00E-05 | 0.0289221 |
| WGS | ABySS | XLOC_040360 | 2268078:4-4707        | cdRNA04-Dia-R3 | cdRNA05-postDia | 32.9158  | 4.63576 | -2.8279  | 5.00E-05 | 0.0289221 |
| WGS | ABySS | XLOC_040360 | 2268078:4-4707        | cdRNA03-Dia-R2 | cdRNA05-postDia | 32.1031  | 4.63576 | -2.79183 | 5.00E-05 | 0.0289221 |
| WGS | ABySS | XLOC_040644 | 2268196:212039-217879 | cdRNA02-Dia-R1 | cdRNA05-postDia | 6.18631  | 28.7763 | 2.21773  | 5.00E-05 | 0.0289221 |
| WGS | ABySS | XLOC_040644 | 2268196:212039-217879 | cdRNA01-preDia | cdRNA05-postDia | 5.98192  | 28.7763 | 2.2662   | 5.00E-05 | 0.0289221 |
| WGS | ABySS | XLOC_040713 | 2268242:57-2218       | cdRNA01-preDia | cdRNA03-Dia-R2  | 1.27827  | 24.6287 | 4.26808  | 5.00E-05 | 0.0289221 |
| WGS | ABySS | XLOC_040713 | 2268242:57-2218       | cdRNA01-preDia | cdRNA04-Dia-R3  | 1.27827  | 25.4925 | 4.31781  | 5.00E-05 | 0.0289221 |
| WGS | ABySS | XLOC_040779 | 2268282:83350-91450   | cdRNA01-preDia | cdRNA03-Dia-R2  | 50.8303  | 9.18123 | -2.46893 | 5.00E-05 | 0.0289221 |
| WGS | ABySS | XLOC_040779 | 2268282:83350-91450   | cdRNA01-preDia | cdRNA04-Dia-R3  | 50.8303  | 9.21979 | -2.46288 | 5.00E-05 | 0.0289221 |
| WGS | ABySS | XLOC_040827 | 2268311:11515-14742   | cdRNA01-preDia | cdRNA05-postDia | 1.75995  | 11.4849 | 2.70614  | 5.00E-05 | 0.0289221 |
| WGS | ABySS | XLOC_040883 | 2268345:6-3707        | cdRNA01-preDia | cdRNA05-postDia | 53.5137  | 339.58  | 2.66577  | 0.0001   | 0.0499641 |
| WGS | ABySS | XLOC_041178 | 2268486:6371-18195    | cdRNA04-Dia-R3 | cdRNA05-postDia | 11.3065  | 1.1387  | -3.3117  | 5.00E-05 | 0.0289221 |
| WGS | ABySS | XLOC_041178 | 2268486:6371-18195    | cdRNA03-Dia-R2 | cdRNA05-postDia | 10.6934  | 1.1387  | -3.23126 | 5.00E-05 | 0.0289221 |
| WGS | ABySS | XLOC_041178 | 2268486:6371-18195    | cdRNA01-preDia | cdRNA04-Dia-R3  | 1.99574  | 11.3065 | 2.50216  | 0.0001   | 0.0499641 |
| WGS | ABySS | XLOC_041182 | 2268486:18258-22636   | cdRNA04-Dia-R3 | cdRNA05-postDia | 13.0413  | 2.00563 | -2.70096 | 5.00E-05 | 0.0289221 |
| WGS | ABySS | XLOC_041182 | 2268486:18258-22636   | cdRNA03-Dia-R2 | cdRNA05-postDia | 12.8509  | 2.00563 | -2.67974 | 5.00E-05 | 0.0289221 |
| WGS | ABySS | XLOC_041182 | 2268486:18258-22636   | cdRNA01-preDia | cdRNA03-Dia-R2  | 0.700747 | 12.8509 | 4.19683  | 5.00E-05 | 0.0289221 |
| WGS | ABySS | XLOC_041182 | 2268486:18258-22636   | cdRNA01-preDia | cdRNA04-Dia-R3  | 0.700747 | 13.0413 | 4.21805  | 5.00E-05 | 0.0289221 |
| WGS | ABySS | XLOC_041292 | 2268545:68160-72265   | cdRNA04-Dia-R3 | cdRNA05-postDia | 13.2268  | 65.929  | 2.31745  | 0.0001   | 0.0499641 |
| WGS | ABySS | XLOC_041292 | 2268545:68160-72265   | cdRNA02-Dia-R1 | cdRNA05-postDia | 13.0457  | 65.929  | 2.33734  | 5.00E-05 | 0.0289221 |
| WGS | ABySS | XLOC_041292 | 2268545:68160-72265   | cdRNA03-Dia-R2 | cdRNA05-postDia | 12.9078  | 65.929  | 2.35267  | 5.00E-05 | 0.0289221 |
| WGS | ABySS | XLOC_041877 | 2268814:476-32232     | cdRNA03-Dia-R2 | cdRNA05-postDia | 30.0314  | 6.57157 | -2.19216 | 5.00E-05 | 0.0289221 |
| WGS | ABySS | XLOC_041878 | 2268814:35818-41270   | cdRNA03-Dia-R2 | cdRNA05-postDia | 51.9141  | 8.6533  | -2.5848  | 0.0001   | 0.0499641 |
| WGS | ABySS | XLOC_042198 | 2268979:48336-53347   | cdRNA03-Dia-R2 | cdRNA05-postDia | 1.92612  | 11.2414 | 2.54505  | 0.0001   | 0.0499641 |
| WGS | ABySS | XLOC_042554 | 2269131:34150-35058   | cdRNA01-preDia | cdRNA03-Dia-R2  | 5.02857  | 47.5775 | 3.24206  | 5.00E-05 | 0.0289221 |
| WGS | ABySS | XLOC_042554 | 2269131:34150-35058   | cdRNA01-preDia | cdRNA04-Dia-R3  | 5.02857  | 49.9084 | 3.31106  | 5.00E-05 | 0.0289221 |
| WGS | ABySS | XLOC_042841 | 2269310:3211-8100     | cdRNA04-Dia-R3 | cdRNA05-postDia | 6.6116   | 52.3593 | 2.98537  | 5.00E-05 | 0.0289221 |
| WGS | ABySS | XLOC_042841 | 2269310:3211-8100     | cdRNA02-Dia-R1 | cdRNA05-postDia | 5.54254  | 52.3593 | 3.23983  | 5.00E-05 | 0.0289221 |
| WGS | ABySS | XLOC_042841 | 2269310:3211-8100     | cdRNA03-Dia-R2 | cdRNA05-postDia | 5.5018   | 52.3593 | 3.25047  | 5.00E-05 | 0.0289221 |
| WGS | ABySS | XLOC_042841 | 2269310:3211-8100     | cdRNA01-preDia | cdRNA05-postDia | 2.20379  | 52.3593 | 4.57039  | 5.00E-05 | 0.0289221 |
| WGS | ABySS | XLOC_043088 | 2269468:74977-77522   | cdRNA01-preDia | cdRNA05-postDia | 235.833  | 26.0557 | -3.17809 | 5.00E-05 | 0.0289221 |
| WGS | ABySS | XLOC_043132 | 2269488:4036-24257    | cdRNA04-Dia-R3 | cdRNA05-postDia | 7.28369  | 1.34442 | -2.43768 | 5.00E-05 | 0.0289221 |
| WGS | ABySS | XLOC_043132 | 2269488:4036-24257    | cdRNA03-Dia-R2 | cdRNA05-postDia | 7.08485  | 1.34442 | -2.39775 | 0.0001   | 0.0499641 |
| WGS | ABySS | XLOC_043449 | 2269645:19442-38489   | cdRNA03-Dia-R2 | cdRNA05-postDia | 1.46748  | 9.10112 | 2.6327   | 5.00E-05 | 0.0289221 |
| WGS | ABySS | XLOC_043655 | 2269758:30166-32015   | cdRNA01-preDia | cdRNA05-postDia | 17.0757  | 2.85668 | -2.57953 | 5.00E-05 | 0.0289221 |
| WGS | ABySS | XLOC_044005 | 2269964:0-1667        | cdRNA01-preDia | cdRNA05-postDia | 2.63059  | 27.7523 | 3.39915  | 5.00E-05 | 0.0289221 |
| WGS | ABySS | XLOC_044006 | 2269964:1739-3143     | cdRNA01-preDia | cdRNA05-postDia | 1.60356  | 13.5402 | 3.0779   | 5.00E-05 | 0.0289221 |
| WGS | ABySS | XLOC_044125 | 2270018:73936-78564   | cdRNA02-Dia-R1 | cdRNA05-postDia | 3.27888  | 17.7879 | 2.43962  | 0.0001   | 0.0499641 |
| WGS | ABySS | XLOC_044125 | 2270018:73936-78564   | cdRNA04-Dia-R3 | cdRNA05-postDia | 2.28727  | 17.7879 | 2.95919  | 5.00E-05 | 0.0289221 |
| WGS | ABySS | XLOC_044125 | 2270018:73936-78564   | cdRNA03-Dia-R2 | cdRNA05-postDia | 1.90376  | 17.7879 | 3.22397  | 5.00E-05 | 0.0289221 |
| WGS | ABySS | XLOC_044315 | 2270113:23018-26875   | cdRNA01-preDia | cdRNA05-postDia | 3.13032  | 18.8309 | 2.58872  | 0.0001   | 0.0499641 |
| WGS | ABySS | XLOC_044345 | 2270126:3497-11602    | cdRNA04-Dia-R3 | cdRNA05-postDia | 9.71075  | 70.2346 | 2.85453  | 5.00E-05 | 0.0289221 |
| WGS | ABySS | XLOC_044345 | 2270126:3497-11602    | cdRNA02-Dia-R1 | cdRNA05-postDia | 8.61923  | 70.2346 | 3.02655  | 5.00E-05 | 0.0289221 |

|     |       |             |                       |                |                 |         |         |          |          |           |
|-----|-------|-------------|-----------------------|----------------|-----------------|---------|---------|----------|----------|-----------|
| WGS | ABySS | XLOC_044345 | 2270126:3497-11602    | cdRNA03-Dia-R2 | cdRNA05-postDia | 8.27042 | 70.2346 | 3.08615  | 5.00E-05 | 0.0289221 |
| WGS | ABySS | XLOC_044345 | 2270126:3497-11602    | cdRNA01-preDia | cdRNA05-postDia | 2.8856  | 70.2346 | 4.60524  | 5.00E-05 | 0.0289221 |
| WGS | ABySS | XLOC_044348 | 2270127:6735-26514    | cdRNA03-Dia-R2 | cdRNA05-postDia | 86.0819 | 15.1372 | -2.50761 | 5.00E-05 | 0.0289221 |
| WGS | ABySS | XLOC_044348 | 2270127:6735-26514    | cdRNA04-Dia-R3 | cdRNA05-postDia | 80.3964 | 15.1372 | -2.40903 | 5.00E-05 | 0.0289221 |
| WGS | ABySS | XLOC_044492 | 2270215:18035-23284   | cdRNA02-Dia-R1 | cdRNA05-postDia | 15.1416 | 338.561 | 4.48282  | 5.00E-05 | 0.0289221 |
| WGS | ABySS | XLOC_044492 | 2270215:18035-23284   | cdRNA01-preDia | cdRNA05-postDia | 5.47929 | 338.561 | 5.94928  | 5.00E-05 | 0.0289221 |
| WGS | ABySS | XLOC_044492 | 2270215:18035-23284   | cdRNA04-Dia-R3 | cdRNA05-postDia | 3.92389 | 338.561 | 6.43099  | 5.00E-05 | 0.0289221 |
| WGS | ABySS | XLOC_044492 | 2270215:18035-23284   | cdRNA03-Dia-R2 | cdRNA05-postDia | 3.76551 | 338.561 | 6.49042  | 5.00E-05 | 0.0289221 |
| WGS | ABySS | XLOC_044718 | 2270301:117514-123356 | cdRNA03-Dia-R2 | cdRNA05-postDia | 4.68052 | 23.6195 | 2.33524  | 0.0001   | 0.0499641 |
| WGS | ABySS | XLOC_044718 | 2270301:117514-123356 | cdRNA04-Dia-R3 | cdRNA05-postDia | 4.67013 | 23.6195 | 2.33844  | 0.0001   | 0.0499641 |
| WGS | ABySS | XLOC_045190 | 2270549:2623-9320     | cdRNA01-preDia | cdRNA04-Dia-R3  | 7.18224 | 54.3958 | 2.92099  | 5.00E-05 | 0.0289221 |
| WGS | ABySS | XLOC_045190 | 2270549:2623-9320     | cdRNA01-preDia | cdRNA03-Dia-R2  | 7.18224 | 55.0113 | 2.93722  | 5.00E-05 | 0.0289221 |
| WGS | ABySS | XLOC_045281 | 2270598:4234-14191    | cdRNA01-preDia | cdRNA04-Dia-R3  | 9.17277 | 57.9992 | 2.6606   | 5.00E-05 | 0.0289221 |
| WGS | ABySS | XLOC_045281 | 2270598:4234-14191    | cdRNA01-preDia | cdRNA03-Dia-R2  | 9.17277 | 61.451  | 2.74401  | 5.00E-05 | 0.0289221 |
| WGS | ABySS | XLOC_045404 | 2270634:2902-11967    | cdRNA01-preDia | cdRNA02-Dia-R1  | 5.57477 | 30.5133 | 2.45245  | 5.00E-05 | 0.0289221 |
| WGS | ABySS | XLOC_045404 | 2270634:2902-11967    | cdRNA01-preDia | cdRNA04-Dia-R3  | 5.57477 | 43.7258 | 2.9715   | 5.00E-05 | 0.0289221 |
| WGS | ABySS | XLOC_045404 | 2270634:2902-11967    | cdRNA01-preDia | cdRNA04-Dia-R2  | 5.57477 | 45.9012 | 3.04155  | 5.00E-05 | 0.0289221 |
| WGS | ABySS | XLOC_045558 | 2270728:89274-96201   | cdRNA04-Dia-R3 | cdRNA05-postDia | 10.8702 | 1.76454 | -2.62302 | 0.0001   | 0.0499641 |
| WGS | ABySS | XLOC_045569 | 2270729:666-16258     | cdRNA03-Dia-R2 | cdRNA05-postDia | 40.7533 | 231.876 | 2.50837  | 5.00E-05 | 0.0289221 |
| WGS | ABySS | XLOC_045696 | 2270793:9130-11497    | cdRNA02-Dia-R1 | cdRNA05-postDia | 21.0717 | 110.34  | 2.38858  | 0.0001   | 0.0499641 |
| WGS | ABySS | XLOC_045735 | 2270826:15-3037       | cdRNA02-Dia-R1 | cdRNA05-postDia | 14.0216 | 98.2263 | 2.80846  | 5.00E-05 | 0.0289221 |
| WGS | ABySS | XLOC_045735 | 2270826:15-3037       | cdRNA04-Dia-R3 | cdRNA05-postDia | 8.23063 | 98.2263 | 3.57703  | 5.00E-05 | 0.0289221 |
| WGS | ABySS | XLOC_045735 | 2270826:15-3037       | cdRNA03-Dia-R2 | cdRNA05-postDia | 5.91731 | 98.2263 | 4.0531   | 5.00E-05 | 0.0289221 |
| WGS | ABySS | XLOC_045735 | 2270826:15-3037       | cdRNA01-preDia | cdRNA05-postDia | 2.94045 | 98.2263 | 5.062    | 5.00E-05 | 0.0289221 |
| WGS | ABySS | XLOC_046016 | 2270981:11604-26851   | cdRNA04-Dia-R3 | cdRNA05-postDia | 18.0868 | 4.13138 | -2.13024 | 0.0001   | 0.0499641 |
| WGS | ABySS | XLOC_046157 | 2271098:2551-5011     | cdRNA03-Dia-R2 | cdRNA05-postDia | 1.8203  | 13.7921 | 2.9216   | 5.00E-05 | 0.0289221 |
| WGS | ABySS | XLOC_046157 | 2271098:2551-5011     | cdRNA04-Dia-R3 | cdRNA05-postDia | 1.798   | 13.7921 | 2.93938  | 5.00E-05 | 0.0289221 |
| WGS | ABySS | XLOC_046240 | 2271147:27572-29133   | cdRNA01-preDia | cdRNA03-Dia-R2  | 68.3814 | 9.71677 | -2.81505 | 5.00E-05 | 0.0289221 |
| WGS | ABySS | XLOC_046240 | 2271147:27572-29133   | cdRNA01-preDia | cdRNA04-Dia-R3  | 68.3814 | 9.96742 | -2.77831 | 5.00E-05 | 0.0289221 |
| WGS | ABySS | XLOC_046240 | 2271147:27572-29133   | cdRNA04-Dia-R3 | cdRNA05-postDia | 9.96742 | 67.2436 | 2.75411  | 5.00E-05 | 0.0289221 |
| WGS | ABySS | XLOC_046240 | 2271147:27572-29133   | cdRNA03-Dia-R2 | cdRNA05-postDia | 9.71677 | 67.2436 | 2.79085  | 0.0001   | 0.0499641 |
| WGS | ABySS | XLOC_046625 | 2271328:26988-33103   | cdRNA01-preDia | cdRNA05-postDia | 2.03217 | 12.9722 | 2.67433  | 0.0001   | 0.0499641 |
| WGS | ABySS | XLOC_046790 | 2271421:12697-14151   | cdRNA01-preDia | cdRNA03-Dia-R2  | 9.91953 | 48.5257 | 2.2904   | 0.0001   | 0.0499641 |
| WGS | ABySS | XLOC_046809 | 2271439:11448-19830   | cdRNA04-Dia-R3 | cdRNA05-postDia | 3.32791 | 18.6452 | 2.48612  | 0.0001   | 0.0499641 |
| WGS | ABySS | XLOC_046809 | 2271439:11448-19830   | cdRNA03-Dia-R2 | cdRNA05-postDia | 3.09178 | 18.6452 | 2.59229  | 5.00E-05 | 0.0289221 |
| WGS | ABySS | XLOC_047161 | 2271587:41130-42584   | cdRNA01-preDia | cdRNA05-postDia | 5.01851 | 28.7065 | 2.51605  | 5.00E-05 | 0.0289221 |
| WGS | ABySS | XLOC_047239 | 2271624:112664-114343 | cdRNA03-Dia-R2 | cdRNA05-postDia | 4.84266 | 30.3369 | 2.6472   | 5.00E-05 | 0.0289221 |
| WGS | ABySS | XLOC_047239 | 2271624:112664-114343 | cdRNA04-Dia-R3 | cdRNA05-postDia | 4.02434 | 30.3369 | 2.91425  | 5.00E-05 | 0.0289221 |
| WGS | ABySS | XLOC_047381 | 2271681:4056-5922     | cdRNA01-preDia | cdRNA04-Dia-R3  | 22.0289 | 104.57  | 2.247    | 0.0001   | 0.0499641 |
| WGS | ABySS | XLOC_047381 | 2271681:4056-5922     | cdRNA01-preDia | cdRNA05-postDia | 22.0289 | 127.283 | 2.53058  | 5.00E-05 | 0.0289221 |
| WGS | ABySS | XLOC_047638 | 2271836:46137-47232   | cdRNA01-preDia | cdRNA05-postDia | 5.60829 | 42.9415 | 2.93674  | 5.00E-05 | 0.0289221 |
| WGS | ABySS | XLOC_047761 | 2271915:926-4004      | cdRNA02-Dia-R1 | cdRNA05-postDia | 22.7888 | 210.518 | 3.20755  | 5.00E-05 | 0.0289221 |
| WGS | ABySS | XLOC_047761 | 2271915:926-4004      | cdRNA04-Dia-R3 | cdRNA05-postDia | 10.9837 | 210.518 | 4.26051  | 5.00E-05 | 0.0289221 |
| WGS | ABySS | XLOC_047761 | 2271915:926-4004      | cdRNA01-preDia | cdRNA05-postDia | 10.623  | 210.518 | 4.30869  | 5.00E-05 | 0.0289221 |
| WGS | ABySS | XLOC_047761 | 2271915:926-4004      | cdRNA03-Dia-R2 | cdRNA05-postDia | 10.0277 | 210.518 | 4.39188  | 5.00E-05 | 0.0289221 |
| WGS | ABySS | XLOC_047917 | 2272019:3377-6030     | cdRNA01-preDia | cdRNA03-Dia-R2  | 7.18035 | 44.1181 | 2.61924  | 5.00E-05 | 0.0289221 |
| WGS | ABySS | XLOC_047917 | 2272019:3377-6030     | cdRNA01-preDia | cdRNA04-Dia-R3  | 7.18035 | 46.6797 | 2.70067  | 5.00E-05 | 0.0289221 |

|     |       |             |                      |                |                 |          |         |          |          |           |
|-----|-------|-------------|----------------------|----------------|-----------------|----------|---------|----------|----------|-----------|
| WGS | ABySS | XLOC_048002 | 2272063:8631-11897   | cdRNA02-Dia-R1 | cdRNA05-postDia | 29.0977  | 143.379 | 2.30086  | 5.00E-05 | 0.0289221 |
| WGS | ABySS | XLOC_048002 | 2272063:8631-11897   | cdRNA01-preDia | cdRNA05-postDia | 20.0475  | 143.379 | 2.83834  | 5.00E-05 | 0.0289221 |
| WGS | ABySS | XLOC_048034 | 2272086:9990-11222   | cdRNA01-preDia | cdRNA05-postDia | 17.8246  | 113.295 | 2.66815  | 5.00E-05 | 0.0289221 |
| WGS | ABySS | XLOC_048034 | 2272086:9990-11222   | cdRNA02-Dia-R1 | cdRNA05-postDia | 7.13111  | 113.295 | 3.98982  | 5.00E-05 | 0.0289221 |
| WGS | ABySS | XLOC_048034 | 2272086:9990-11222   | cdRNA04-Dia-R3 | cdRNA05-postDia | 6.23037  | 113.295 | 4.18463  | 5.00E-05 | 0.0289221 |
| WGS | ABySS | XLOC_048034 | 2272086:9990-11222   | cdRNA03-Dia-R2 | cdRNA05-postDia | 5.98029  | 113.295 | 4.24373  | 5.00E-05 | 0.0289221 |
| WGS | ABySS | XLOC_048070 | 2272099:22558-25365  | cdRNA04-Dia-R3 | cdRNA05-postDia | 173.083  | 30.3133 | -2.51344 | 5.00E-05 | 0.0289221 |
| WGS | ABySS | XLOC_048070 | 2272099:22558-25365  | cdRNA03-Dia-R2 | cdRNA05-postDia | 166.149  | 30.3133 | -2.45446 | 5.00E-05 | 0.0289221 |
| WGS | ABySS | XLOC_048089 | 2272113:0-8819       | cdRNA01-preDia | cdRNA05-postDia | 2.8669   | 17.5149 | 2.61102  | 5.00E-05 | 0.0289221 |
| WGS | ABySS | XLOC_048169 | 2272166:361-4114     | cdRNA01-preDia | cdRNA05-postDia | 3.687    | 25.0037 | 2.76162  | 5.00E-05 | 0.0289221 |
| WGS | ABySS | XLOC_048181 | 2272176:55193-60064  | cdRNA01-preDia | cdRNA02-Dia-R1  | 1.00289  | 7.02212 | 2.80774  | 5.00E-05 | 0.0289221 |
| WGS | ABySS | XLOC_048181 | 2272176:55193-60064  | cdRNA01-preDia | cdRNA03-Dia-R2  | 1.00289  | 15.9987 | 3.99572  | 5.00E-05 | 0.0289221 |
| WGS | ABySS | XLOC_048181 | 2272176:55193-60064  | cdRNA01-preDia | cdRNA04-Dia-R3  | 1.00289  | 16.7534 | 4.06221  | 5.00E-05 | 0.0289221 |
| WGS | ABySS | XLOC_048181 | 2272176:55193-60064  | cdRNA01-preDia | cdRNA05-postDia | 1.00289  | 22.4791 | 4.48634  | 5.00E-05 | 0.0289221 |
| WGS | ABySS | XLOC_048336 | 2272251:11406-16247  | cdRNA03-Dia-R2 | cdRNA05-postDia | 26.3802  | 2.14628 | -3.61955 | 5.00E-05 | 0.0289221 |
| WGS | ABySS | XLOC_048336 | 2272251:11406-16247  | cdRNA04-Dia-R3 | cdRNA05-postDia | 24.6162  | 2.14628 | -3.51969 | 5.00E-05 | 0.0289221 |
| WGS | ABySS | XLOC_048363 | 2272271:45629-51503  | cdRNA01-preDia | cdRNA05-postDia | 3.73639  | 27.0925 | 2.85818  | 5.00E-05 | 0.0289221 |
| WGS | ABySS | XLOC_048370 | 2272275:11797-13281  | cdRNA03-Dia-R2 | cdRNA05-postDia | 5.00317  | 35.021  | 2.80731  | 5.00E-05 | 0.0289221 |
| WGS | ABySS | XLOC_048370 | 2272275:11797-13281  | cdRNA04-Dia-R3 | cdRNA05-postDia | 4.9601   | 35.021  | 2.81978  | 5.00E-05 | 0.0289221 |
| WGS | ABySS | XLOC_048860 | 2272537:0-972        | cdRNA04-Dia-R3 | cdRNA05-postDia | 6.49588  | 34.9304 | 2.42689  | 5.00E-05 | 0.0289221 |
| WGS | ABySS | XLOC_048860 | 2272537:0-972        | cdRNA03-Dia-R2 | cdRNA05-postDia | 6.43154  | 34.9304 | 2.44125  | 0.0001   | 0.0499641 |
| WGS | ABySS | XLOC_048860 | 2272537:0-972        | cdRNA02-Dia-R1 | cdRNA05-postDia | 6.30211  | 34.9304 | 2.47057  | 5.00E-05 | 0.0289221 |
| WGS | ABySS | XLOC_048892 | 2272557:3132-6430    | cdRNA03-Dia-R2 | cdRNA05-postDia | 213.436  | 23.9877 | -3.15344 | 0.0001   | 0.0499641 |
| WGS | ABySS | XLOC_048892 | 2272557:3132-6430    | cdRNA04-Dia-R3 | cdRNA05-postDia | 199.269  | 23.9877 | -3.05435 | 5.00E-05 | 0.0289221 |
| WGS | ABySS | XLOC_048892 | 2272557:3132-6430    | cdRNA01-preDia | cdRNA03-Dia-R2  | 30.5027  | 213.436 | 2.80679  | 5.00E-05 | 0.0289221 |
| WGS | ABySS | XLOC_049446 | 2272835:36083-38029  | cdRNA02-Dia-R1 | cdRNA05-postDia | 15.4525  | 85.3866 | 2.46617  | 0.0001   | 0.0499641 |
| WGS | ABySS | XLOC_049447 | 2272835:38164-47711  | cdRNA02-Dia-R1 | cdRNA05-postDia | 11.2007  | 73.3551 | 2.71131  | 5.00E-05 | 0.0289221 |
| WGS | ABySS | XLOC_049746 | 2272989:1179-3895    | cdRNA02-Dia-R1 | cdRNA05-postDia | 1.20415  | 16.2384 | 3.75333  | 5.00E-05 | 0.0289221 |
| WGS | ABySS | XLOC_049746 | 2272989:1179-3895    | cdRNA01-preDia | cdRNA05-postDia | 0.541345 | 16.2384 | 4.90672  | 5.00E-05 | 0.0289221 |
| WGS | ABySS | XLOC_049747 | 2272989:0-1129       | cdRNA01-preDia | cdRNA05-postDia | 1.20657  | 21.5148 | 4.15635  | 0.0001   | 0.0499641 |
| WGS | ABySS | XLOC_050608 | 2273494:22545-31875  | cdRNA01-preDia | cdRNA05-postDia | 35.4606  | 409.949 | 3.53115  | 5.00E-05 | 0.0289221 |
| WGS | ABySS | XLOC_050608 | 2273494:22545-31875  | cdRNA04-Dia-R3 | cdRNA05-postDia | 15.7422  | 409.949 | 4.70273  | 5.00E-05 | 0.0289221 |
| WGS | ABySS | XLOC_050608 | 2273494:22545-31875  | cdRNA03-Dia-R2 | cdRNA05-postDia | 15.4405  | 409.949 | 4.73065  | 5.00E-05 | 0.0289221 |
| WGS | ABySS | XLOC_050794 | 2273600:88092-100703 | cdRNA01-preDia | cdRNA04-Dia-R3  | 9.30233  | 45.0339 | 2.27535  | 0.0001   | 0.0499641 |
| WGS | ABySS | XLOC_050794 | 2273600:88092-100703 | cdRNA01-preDia | cdRNA03-Dia-R2  | 9.30233  | 47.2118 | 2.34348  | 5.00E-05 | 0.0289221 |
| WGS | ABySS | XLOC_050849 | 2273630:11477-16485  | cdRNA03-Dia-R2 | cdRNA05-postDia | 57.8181  | 9.15053 | -2.65959 | 5.00E-05 | 0.0289221 |
| WGS | ABySS | XLOC_050849 | 2273630:11477-16485  | cdRNA04-Dia-R3 | cdRNA05-postDia | 55.0261  | 9.15053 | -2.58819 | 5.00E-05 | 0.0289221 |
| WGS | ABySS | XLOC_050849 | 2273630:11477-16485  | cdRNA01-preDia | cdRNA03-Dia-R2  | 11.3618  | 57.8181 | 2.34733  | 5.00E-05 | 0.0289221 |
| WGS | ABySS | XLOC_050994 | 2273709:968-2170     | cdRNA02-Dia-R1 | cdRNA05-postDia | 31.6194  | 3281.8  | 6.69754  | 5.00E-05 | 0.0289221 |
| WGS | ABySS | XLOC_050994 | 2273709:968-2170     | cdRNA03-Dia-R2 | cdRNA05-postDia | 21.7395  | 3281.8  | 7.23802  | 5.00E-05 | 0.0289221 |
| WGS | ABySS | XLOC_050994 | 2273709:968-2170     | cdRNA01-preDia | cdRNA05-postDia | 19.7597  | 3281.8  | 7.37578  | 5.00E-05 | 0.0289221 |
| WGS | ABySS | XLOC_050994 | 2273709:968-2170     | cdRNA04-Dia-R3 | cdRNA05-postDia | 17.8466  | 3281.8  | 7.5227   | 5.00E-05 | 0.0289221 |
| WGS | ABySS | XLOC_051066 | 2273766:30737-36268  | cdRNA03-Dia-R2 | cdRNA05-postDia | 2.65271  | 14.9012 | 2.48989  | 5.00E-05 | 0.0289221 |
| WGS | ABySS | XLOC_051066 | 2273766:30737-36268  | cdRNA04-Dia-R3 | cdRNA05-postDia | 2.56001  | 14.9012 | 2.5412   | 5.00E-05 | 0.0289221 |
| WGS | ABySS | XLOC_051122 | 2273786:15073-26147  | cdRNA04-Dia-R3 | cdRNA05-postDia | 15.821   | 2.68085 | -2.56108 | 0.0001   | 0.0499641 |
| WGS | ABySS | XLOC_051122 | 2273786:15073-26147  | cdRNA03-Dia-R2 | cdRNA05-postDia | 15.5573  | 2.68085 | -2.53683 | 0.0001   | 0.0499641 |
| WGS | ABySS | XLOC_051196 | 2273829:2451-3322    | cdRNA03-Dia-R2 | cdRNA05-postDia | 419.277  | 32.6538 | -3.68258 | 0.0001   | 0.0499641 |

|     |       |             |                     |                |                 |          |         |          |          |           |
|-----|-------|-------------|---------------------|----------------|-----------------|----------|---------|----------|----------|-----------|
| WGS | ABySS | XLOC_051196 | 2273829:2451-3322   | cdRNA04-Dia-R3 | cdRNA05-postDia | 409.118  | 32.6538 | -3.64719 | 0.0001   | 0.0499641 |
| WGS | ABySS | XLOC_051397 | 2273914:23645-28792 | cdRNA01-preDia | cdRNA04-Dia-R3  | 14.4364  | 2.14073 | -2.75354 | 5.00E-05 | 0.0289221 |
| WGS | ABySS | XLOC_051397 | 2273914:23645-28792 | cdRNA01-preDia | cdRNA03-Dia-R2  | 14.4364  | 2.69089 | -2.42356 | 0.0001   | 0.0499641 |
| WGS | ABySS | XLOC_051397 | 2273914:23645-28792 | cdRNA03-Dia-R2 | cdRNA05-postDia | 2.69089  | 12.3414 | 2.19736  | 0.0001   | 0.0499641 |
| WGS | ABySS | XLOC_051397 | 2273914:23645-28792 | cdRNA04-Dia-R3 | cdRNA05-postDia | 2.14073  | 12.3414 | 2.52734  | 0.0001   | 0.0499641 |
| WGS | ABySS | XLOC_051484 | 2273957:25436-28738 | cdRNA01-preDia | cdRNA05-postDia | 5.38922  | 32.5187 | 2.59312  | 5.00E-05 | 0.0289221 |
| WGS | ABySS | XLOC_051775 | 2274152:10552-27125 | cdRNA01-preDia | cdRNA05-postDia | 9.69181  | 50.8451 | 2.39127  | 0.0001   | 0.0499641 |
| WGS | ABySS | XLOC_052116 | 2274336:3219-12828  | cdRNA04-Dia-R3 | cdRNA05-postDia | 13.4077  | 101.891 | 2.92589  | 5.00E-05 | 0.0289221 |
| WGS | ABySS | XLOC_052116 | 2274336:3219-12828  | cdRNA03-Dia-R2 | cdRNA05-postDia | 13.1571  | 101.891 | 2.95311  | 5.00E-05 | 0.0289221 |
| WGS | ABySS | XLOC_052116 | 2274336:3219-12828  | cdRNA02-Dia-R1 | cdRNA05-postDia | 8.80506  | 101.891 | 3.53255  | 5.00E-05 | 0.0289221 |
| WGS | ABySS | XLOC_052116 | 2274336:3219-12828  | cdRNA01-preDia | cdRNA05-postDia | 1.98636  | 101.891 | 5.68076  | 5.00E-05 | 0.0289221 |
| WGS | ABySS | XLOC_052146 | 2274354:8287-23726  | cdRNA01-preDia | cdRNA05-postDia | 28.3317  | 167.143 | 2.56059  | 5.00E-05 | 0.0289221 |
| WGS | ABySS | XLOC_052146 | 2274354:8287-23726  | cdRNA02-Dia-R1 | cdRNA05-postDia | 25.3384  | 167.143 | 2.72168  | 5.00E-05 | 0.0289221 |
| WGS | ABySS | XLOC_052146 | 2274354:8287-23726  | cdRNA04-Dia-R3 | cdRNA05-postDia | 19.5184  | 167.143 | 3.09817  | 5.00E-05 | 0.0289221 |
| WGS | ABySS | XLOC_052146 | 2274354:8287-23726  | cdRNA03-Dia-R2 | cdRNA05-postDia | 18.9875  | 167.143 | 3.13796  | 5.00E-05 | 0.0289221 |
| WGS | ABySS | XLOC_052179 | 2274375:6732-13111  | cdRNA03-Dia-R2 | cdRNA05-postDia | 3.01085  | 23.1504 | 2.9428   | 5.00E-05 | 0.0289221 |
| WGS | ABySS | XLOC_052179 | 2274375:6732-13111  | cdRNA04-Dia-R3 | cdRNA05-postDia | 2.82536  | 23.1504 | 3.03453  | 5.00E-05 | 0.0289221 |
| WGS | ABySS | XLOC_052308 | 2274440:2829-5818   | cdRNA03-Dia-R2 | cdRNA05-postDia | 123.119  | 21.6492 | -2.50767 | 5.00E-05 | 0.0289221 |
| WGS | ABySS | XLOC_052308 | 2274440:2829-5818   | cdRNA04-Dia-R3 | cdRNA05-postDia | 121.534  | 21.6492 | -2.48897 | 5.00E-05 | 0.0289221 |
| WGS | ABySS | XLOC_052417 | 2274508:6504-10810  | cdRNA01-preDia | cdRNA05-postDia | 0.568976 | 6.48176 | 3.50994  | 0.0001   | 0.0499641 |
| WGS | ABySS | XLOC_052418 | 2274508:10926-15098 | cdRNA01-preDia | cdRNA05-postDia | 0.888714 | 9.57    | 3.42873  | 5.00E-05 | 0.0289221 |
| WGS | ABySS | XLOC_052452 | 2274523:83538-86346 | cdRNA01-preDia | cdRNA03-Dia-R2  | 35.2457  | 5.07874 | -2.79491 | 5.00E-05 | 0.0289221 |
| WGS | ABySS | XLOC_052452 | 2274523:83538-86346 | cdRNA01-preDia | cdRNA04-Dia-R3  | 35.2457  | 5.48136 | -2.68484 | 5.00E-05 | 0.0289221 |
| WGS | ABySS | XLOC_052651 | 2274599:13671-15403 | cdRNA01-preDia | cdRNA03-Dia-R2  | 29.231   | 164.575 | 2.49318  | 5.00E-05 | 0.0289221 |
| WGS | ABySS | XLOC_052912 | 2274759:14433-15149 | cdRNA01-preDia | cdRNA05-postDia | 36.9064  | 2.08094 | -4.14856 | 0.0001   | 0.0499641 |
| WGS | ABySS | XLOC_052912 | 2274759:14433-15149 | cdRNA01-preDia | cdRNA03-Dia-R2  | 36.9064  | 4.14529 | -3.15433 | 5.00E-05 | 0.0289221 |
| WGS | ABySS | XLOC_052912 | 2274759:14433-15149 | cdRNA01-preDia | cdRNA04-Dia-R3  | 36.9064  | 4.25837 | -3.1155  | 5.00E-05 | 0.0289221 |
| WGS | ABySS | XLOC_052955 | 2274773:54518-58850 | cdRNA04-Dia-R3 | cdRNA05-postDia | 19.4766  | 90.6589 | 2.21871  | 5.00E-05 | 0.0289221 |
| WGS | ABySS | XLOC_052955 | 2274773:54518-58850 | cdRNA03-Dia-R2 | cdRNA05-postDia | 16.6948  | 90.6589 | 2.44105  | 5.00E-05 | 0.0289221 |
| WGS | ABySS | XLOC_052956 | 2274773:58955-63763 | cdRNA03-Dia-R2 | cdRNA05-postDia | 20.5343  | 100.083 | 2.28509  | 0.0001   | 0.0499641 |
| WGS | ABySS | XLOC_053149 | 2274860:0-3517      | cdRNA03-Dia-R2 | cdRNA05-postDia | 38.8893  | 5.05996 | -2.94218 | 5.00E-05 | 0.0289221 |
| WGS | ABySS | XLOC_053149 | 2274860:0-3517      | cdRNA04-Dia-R3 | cdRNA05-postDia | 36.7101  | 5.05996 | -2.85898 | 5.00E-05 | 0.0289221 |
| WGS | ABySS | XLOC_053262 | 2274930:4565-11022  | cdRNA03-Dia-R2 | cdRNA05-postDia | 6.54897  | 44.2075 | 2.75495  | 5.00E-05 | 0.0289221 |
| WGS | ABySS | XLOC_053262 | 2274930:4565-11022  | cdRNA04-Dia-R3 | cdRNA05-postDia | 6.21294  | 44.2075 | 2.83094  | 5.00E-05 | 0.0289221 |
| WGS | ABySS | XLOC_053262 | 2274930:4565-11022  | cdRNA01-preDia | cdRNA05-postDia | 4.97253  | 44.2075 | 3.15224  | 5.00E-05 | 0.0289221 |
| WGS | ABySS | XLOC_053536 | 2275058:86867-89309 | cdRNA01-preDia | cdRNA02-Dia-R1  | 27.1304  | 236.681 | 3.12496  | 5.00E-05 | 0.0289221 |
| WGS | ABySS | XLOC_053536 | 2275058:86867-89309 | cdRNA01-preDia | cdRNA05-postDia | 27.1304  | 446.796 | 4.04164  | 5.00E-05 | 0.0289221 |
| WGS | ABySS | XLOC_053648 | 2275116:27395-31549 | cdRNA03-Dia-R2 | cdRNA05-postDia | 186.658  | 13.4036 | -3.7997  | 5.00E-05 | 0.0289221 |
| WGS | ABySS | XLOC_053648 | 2275116:27395-31549 | cdRNA04-Dia-R3 | cdRNA05-postDia | 178.838  | 13.4036 | -3.73796 | 5.00E-05 | 0.0289221 |
| WGS | ABySS | XLOC_053648 | 2275116:27395-31549 | cdRNA02-Dia-R1 | cdRNA05-postDia | 68.2428  | 13.4036 | -2.34806 | 5.00E-05 | 0.0289221 |
| WGS | ABySS | XLOC_053648 | 2275116:27395-31549 | cdRNA01-preDia | cdRNA04-Dia-R3  | 33.2183  | 178.838 | 2.4286   | 0.0001   | 0.0499641 |
| WGS | ABySS | XLOC_053676 | 2275136:4341-8167   | cdRNA03-Dia-R2 | cdRNA05-postDia | 227.559  | 42.0383 | -2.43647 | 0.0001   | 0.0499641 |
| WGS | ABySS | XLOC_053676 | 2275136:4341-8167   | cdRNA04-Dia-R3 | cdRNA05-postDia | 214.09   | 42.0383 | -2.34844 | 0.0001   | 0.0499641 |
| WGS | ABySS | XLOC_053910 | 2275255:1437-15794  | cdRNA01-preDia | cdRNA05-postDia | 44.9892  | 9.36134 | -2.26479 | 5.00E-05 | 0.0289221 |
| WGS | ABySS | XLOC_053910 | 2275255:1437-15794  | cdRNA04-Dia-R3 | cdRNA05-postDia | 37.5611  | 9.36134 | -2.00445 | 5.00E-05 | 0.0289221 |
| WGS | ABySS | XLOC_053957 | 2275291:1329-11504  | cdRNA03-Dia-R2 | cdRNA05-postDia | 87.9024  | 14.0722 | -2.64305 | 5.00E-05 | 0.0289221 |
| WGS | ABySS | XLOC_053957 | 2275291:1329-11504  | cdRNA04-Dia-R3 | cdRNA05-postDia | 80.0185  | 14.0722 | -2.50749 | 5.00E-05 | 0.0289221 |

|     |       |             |                       |                |                 |          |         |          |          |           |
|-----|-------|-------------|-----------------------|----------------|-----------------|----------|---------|----------|----------|-----------|
| WGS | ABySS | XLOC_054021 | 2275322:636-9394      | cdRNA03-Dia-R2 | cdRNA05-postDia | 71.5262  | 8.96252 | -2.99649 | 5.00E-05 | 0.0289221 |
| WGS | ABySS | XLOC_054021 | 2275322:636-9394      | cdRNA04-Dia-R3 | cdRNA05-postDia | 71.4763  | 8.96252 | -2.99549 | 5.00E-05 | 0.0289221 |
| WGS | ABySS | XLOC_054021 | 2275322:636-9394      | cdRNA02-Dia-R1 | cdRNA04-Dia-R3  | 11.0229  | 71.4763 | 2.69696  | 5.00E-05 | 0.0289221 |
| WGS | ABySS | XLOC_054021 | 2275322:636-9394      | cdRNA02-Dia-R1 | cdRNA03-Dia-R2  | 11.0229  | 71.5262 | 2.69796  | 5.00E-05 | 0.0289221 |
| WGS | ABySS | XLOC_054021 | 2275322:636-9394      | cdRNA01-preDia | cdRNA04-Dia-R3  | 4.96999  | 71.4763 | 3.84615  | 5.00E-05 | 0.0289221 |
| WGS | ABySS | XLOC_054021 | 2275322:636-9394      | cdRNA01-preDia | cdRNA03-Dia-R2  | 4.96999  | 71.5262 | 3.84716  | 5.00E-05 | 0.0289221 |
| WGS | ABySS | XLOC_054708 | 2275676:15057-19877   | cdRNA03-Dia-R2 | cdRNA05-postDia | 0.99633  | 5.91638 | 2.57002  | 0.0001   | 0.0499641 |
| WGS | ABySS | XLOC_054789 | 2275709:44884-60675   | cdRNA03-Dia-R2 | cdRNA05-postDia | 23.0386  | 2.65494 | -3.1173  | 5.00E-05 | 0.0289221 |
| WGS | ABySS | XLOC_054789 | 2275709:44884-60675   | cdRNA04-Dia-R3 | cdRNA05-postDia | 21.8626  | 2.65494 | -3.04171 | 5.00E-05 | 0.0289221 |
| WGS | ABySS | XLOC_054818 | 2275729:2-10707       | cdRNA01-preDia | cdRNA05-postDia | 3.41684  | 33.476  | 3.29239  | 5.00E-05 | 0.0289221 |
| WGS | ABySS | XLOC_054973 | 2275804:8520-10791    | cdRNA01-preDia | cdRNA05-postDia | 4.83278  | 25.1554 | 2.37994  | 5.00E-05 | 0.0289221 |
| WGS | ABySS | XLOC_054973 | 2275804:8520-10791    | cdRNA02-Dia-R1 | cdRNA05-postDia | 3.29148  | 25.1554 | 2.93406  | 5.00E-05 | 0.0289221 |
| WGS | ABySS | XLOC_055411 | 2275979:8678-9589     | cdRNA01-preDia | cdRNA04-Dia-R3  | 168.529  | 29.5843 | -2.51009 | 0.0001   | 0.0499641 |
| WGS | ABySS | XLOC_055411 | 2275979:8678-9589     | cdRNA01-preDia | cdRNA03-Dia-R2  | 168.529  | 30.7294 | -2.45531 | 5.00E-05 | 0.0289221 |
| WGS | ABySS | XLOC_055456 | 2275994:24489-35334   | cdRNA03-Dia-R2 | cdRNA05-postDia | 1.36658  | 9.91203 | 2.85861  | 0.0001   | 0.0499641 |
| WGS | ABySS | XLOC_055456 | 2275994:24489-35334   | cdRNA04-Dia-R3 | cdRNA05-postDia | 0.788553 | 9.91203 | 3.6519   | 5.00E-05 | 0.0289221 |
| WGS | ABySS | XLOC_055699 | 2276108:38691-44752   | cdRNA02-Dia-R1 | cdRNA05-postDia | 7.00282  | 34.745  | 2.3108   | 5.00E-05 | 0.0289221 |
| WGS | ABySS | XLOC_055840 | 2276168:2954-4209     | cdRNA01-preDia | cdRNA05-postDia | 4.06774  | 51.4418 | 3.66064  | 5.00E-05 | 0.0289221 |
| WGS | ABySS | XLOC_055841 | 2276170:1375-2186     | cdRNA02-Dia-R1 | cdRNA05-postDia | 46.0381  | 334.782 | 2.86232  | 5.00E-05 | 0.0289221 |
| WGS | ABySS | XLOC_056168 | 2276288:99915-106628  | cdRNA01-preDia | cdRNA05-postDia | 3.07987  | 16.0153 | 2.37851  | 5.00E-05 | 0.0289221 |
| WGS | ABySS | XLOC_056168 | 2276288:99915-106628  | cdRNA02-Dia-R1 | cdRNA05-postDia | 3.06056  | 16.0153 | 2.38759  | 5.00E-05 | 0.0289221 |
| WGS | ABySS | XLOC_056282 | 2276349:6961-12381    | cdRNA02-Dia-R1 | cdRNA05-postDia | 3.10425  | 16.7093 | 2.42833  | 5.00E-05 | 0.0289221 |
| WGS | ABySS | XLOC_056315 | 2276366:54556-55987   | cdRNA01-preDia | cdRNA05-postDia | 1.63101  | 11.6606 | 2.83781  | 5.00E-05 | 0.0289221 |
| WGS | ABySS | XLOC_056409 | 2276402:10778-15725   | cdRNA01-preDia | cdRNA04-Dia-R3  | 147.67   | 11.8404 | -3.64058 | 5.00E-05 | 0.0289221 |
| WGS | ABySS | XLOC_056409 | 2276402:10778-15725   | cdRNA01-preDia | cdRNA03-Dia-R2  | 147.67   | 12.1689 | -3.6011  | 5.00E-05 | 0.0289221 |
| WGS | ABySS | XLOC_056522 | 2276454:110463-115052 | cdRNA03-Dia-R2 | cdRNA05-postDia | 13.8998  | 2.46512 | -2.49533 | 0.0001   | 0.0499641 |
| WGS | ABySS | XLOC_056522 | 2276454:110463-115052 | cdRNA04-Dia-R3 | cdRNA05-postDia | 13.711   | 2.46512 | -2.47561 | 0.0001   | 0.0499641 |
| WGS | ABySS | XLOC_056583 | 2276486:64900-72474   | cdRNA01-preDia | cdRNA02-Dia-R1  | 4.77073  | 185.395 | 5.28025  | 5.00E-05 | 0.0289221 |
| WGS | ABySS | XLOC_056583 | 2276486:64900-72474   | cdRNA01-preDia | cdRNA03-Dia-R2  | 4.77073  | 242.557 | 5.66797  | 5.00E-05 | 0.0289221 |
| WGS | ABySS | XLOC_056583 | 2276486:64900-72474   | cdRNA01-preDia | cdRNA04-Dia-R3  | 4.77073  | 253.376 | 5.73092  | 5.00E-05 | 0.0289221 |
| WGS | ABySS | XLOC_056585 | 2276486:93148-112014  | cdRNA01-preDia | cdRNA02-Dia-R1  | 4.96081  | 35.6985 | 2.84722  | 5.00E-05 | 0.0289221 |
| WGS | ABySS | XLOC_056610 | 2276498:21380-24224   | cdRNA02-Dia-R1 | cdRNA05-postDia | 2.98343  | 20.2432 | 2.76239  | 5.00E-05 | 0.0289221 |
| WGS | ABySS | XLOC_056679 | 2276548:888-5963      | cdRNA01-preDia | cdRNA04-Dia-R3  | 51.2101  | 8.63788 | -2.56768 | 5.00E-05 | 0.0289221 |
| WGS | ABySS | XLOC_056679 | 2276548:888-5963      | cdRNA01-preDia | cdRNA03-Dia-R2  | 51.2101  | 8.99019 | -2.51    | 5.00E-05 | 0.0289221 |
| WGS | ABySS | XLOC_056679 | 2276548:888-5963      | cdRNA03-Dia-R2 | cdRNA05-postDia | 8.99019  | 48.4374 | 2.4297   | 5.00E-05 | 0.0289221 |
| WGS | ABySS | XLOC_056679 | 2276548:888-5963      | cdRNA04-Dia-R3 | cdRNA05-postDia | 8.63788  | 48.4374 | 2.48737  | 5.00E-05 | 0.0289221 |
| WGS | ABySS | XLOC_057122 | 2276742:0-3994        | cdRNA01-preDia | cdRNA05-postDia | 0.758498 | 5.67825 | 2.90423  | 0.0001   | 0.0499641 |
| WGS | ABySS | XLOC_057196 | 2276772:10138-12757   | cdRNA01-preDia | cdRNA03-Dia-R2  | 4.90057  | 24.3089 | 2.31046  | 0.0001   | 0.0499641 |
| WGS | ABySS | XLOC_057279 | 2276810:67717-77843   | cdRNA01-preDia | cdRNA05-postDia | 62.0056  | 10.9096 | -2.5068  | 5.00E-05 | 0.0289221 |
| WGS | ABySS | XLOC_057279 | 2276810:67717-77843   | cdRNA04-Dia-R3 | cdRNA05-postDia | 61.3553  | 10.9096 | -2.49159 | 5.00E-05 | 0.0289221 |
| WGS | ABySS | XLOC_057279 | 2276810:67717-77843   | cdRNA03-Dia-R2 | cdRNA05-postDia | 59.7818  | 10.9096 | -2.45411 | 5.00E-05 | 0.0289221 |
| WGS | ABySS | XLOC_057535 | 2276942:17381-44158   | cdRNA04-Dia-R3 | cdRNA05-postDia | 4.5367   | 26.8207 | 2.56363  | 0.0001   | 0.0499641 |
| WGS | ABySS | XLOC_057567 | 2276967:15988-18489   | cdRNA01-preDia | cdRNA05-postDia | 1.96352  | 15.0438 | 2.93766  | 5.00E-05 | 0.0289221 |
| WGS | ABySS | XLOC_057659 | 2277045:421-1116      | cdRNA02-Dia-R1 | cdRNA05-postDia | 4.91915  | 81.2863 | 4.04653  | 5.00E-05 | 0.0289221 |
| WGS | ABySS | XLOC_057659 | 2277045:421-1116      | cdRNA03-Dia-R2 | cdRNA05-postDia | 4.43002  | 81.2863 | 4.19763  | 5.00E-05 | 0.0289221 |
| WGS | ABySS | XLOC_057659 | 2277045:421-1116      | cdRNA04-Dia-R3 | cdRNA05-postDia | 4.14282  | 81.2863 | 4.29433  | 5.00E-05 | 0.0289221 |
| WGS | ABySS | XLOC_057659 | 2277045:421-1116      | cdRNA01-preDia | cdRNA05-postDia | 4.12707  | 81.2863 | 4.29982  | 5.00E-05 | 0.0289221 |



|     |       |             |                       |                |                 |          |         |          |          |           |
|-----|-------|-------------|-----------------------|----------------|-----------------|----------|---------|----------|----------|-----------|
| WGS | ABySS | XLOC_057752 | 2277084:69252-71498   | cdRNA02-Dia-R1 | cdRNA05-postDia | 11.6457  | 117.366 | 3.33314  | 5.00E-05 | 0.0289221 |
| WGS | ABySS | XLOC_057752 | 2277084:69252-71498   | cdRNA04-Dia-R3 | cdRNA05-postDia | 7.39651  | 117.366 | 3.98802  | 5.00E-05 | 0.0289221 |
| WGS | ABySS | XLOC_057752 | 2277084:69252-71498   | cdRNA03-Dia-R2 | cdRNA05-postDia | 6.69312  | 117.366 | 4.13219  | 5.00E-05 | 0.0289221 |
| WGS | ABySS | XLOC_057752 | 2277084:69252-71498   | cdRNA01-preDia | cdRNA05-postDia | 3.88696  | 117.366 | 4.91623  | 5.00E-05 | 0.0289221 |
| WGS | ABySS | XLOC_057800 | 2277113:895-19177     | cdRNA04-Dia-R3 | cdRNA05-postDia | 17.4237  | 2.87951 | -2.59716 | 5.00E-05 | 0.0289221 |
| WGS | ABySS | XLOC_057800 | 2277113:895-19177     | cdRNA03-Dia-R2 | cdRNA05-postDia | 16.1938  | 2.87951 | -2.49155 | 5.00E-05 | 0.0289221 |
| WGS | ABySS | XLOC_057800 | 2277113:895-19177     | cdRNA01-preDia | cdRNA03-Dia-R2  | 2.03854  | 16.1938 | 2.98983  | 5.00E-05 | 0.0289221 |
| WGS | ABySS | XLOC_057800 | 2277113:895-19177     | cdRNA01-preDia | cdRNA04-Dia-R3  | 2.03854  | 17.4237 | 3.09545  | 5.00E-05 | 0.0289221 |
| WGS | ABySS | XLOC_058062 | 2277244:3-6270        | cdRNA02-Dia-R1 | cdRNA05-postDia | 32.3344  | 6.79301 | -2.25095 | 0.0001   | 0.0499641 |
| WGS | ABySS | XLOC_058118 | 2277263:2165-3768     | cdRNA02-Dia-R1 | cdRNA05-postDia | 4.23997  | 24.4798 | 2.52946  | 5.00E-05 | 0.0289221 |
| WGS | ABySS | XLOC_058118 | 2277263:2165-3768     | cdRNA01-preDia | cdRNA05-postDia | 0.969687 | 24.4798 | 4.65793  | 5.00E-05 | 0.0289221 |
| WGS | ABySS | XLOC_058124 | 2277273:0-1625        | cdRNA02-Dia-R1 | cdRNA05-postDia | 1.52482  | 13.7105 | 3.16857  | 5.00E-05 | 0.0289221 |
| WGS | ABySS | XLOC_058124 | 2277273:0-1625        | cdRNA04-Dia-R3 | cdRNA05-postDia | 1.01424  | 13.7105 | 3.75682  | 5.00E-05 | 0.0289221 |
| WGS | ABySS | XLOC_058124 | 2277273:0-1625        | cdRNA03-Dia-R2 | cdRNA05-postDia | 0.869011 | 13.7105 | 3.97977  | 5.00E-05 | 0.0289221 |
| WGS | ABySS | XLOC_058665 | 2277504:502-1702      | cdRNA01-preDia | cdRNA02-Dia-R1  | 87.8898  | 3.86292 | -4.50793 | 5.00E-05 | 0.0289221 |
| WGS | ABySS | XLOC_058665 | 2277504:502-1702      | cdRNA01-preDia | cdRNA03-Dia-R2  | 87.8898  | 11.5147 | -2.93222 | 5.00E-05 | 0.0289221 |
| WGS | ABySS | XLOC_058665 | 2277504:502-1702      | cdRNA01-preDia | cdRNA04-Dia-R3  | 87.8898  | 11.7137 | -2.9075  | 5.00E-05 | 0.0289221 |
| WGS | ABySS | XLOC_058795 | 2277566:46664-49108   | cdRNA01-preDia | cdRNA05-postDia | 63.0458  | 329.884 | 2.38749  | 5.00E-05 | 0.0289221 |
| WGS | ABySS | XLOC_058827 | 2277578:1324-7471     | cdRNA04-Dia-R3 | cdRNA05-postDia | 40.9406  | 6.15685 | -2.73327 | 5.00E-05 | 0.0289221 |
| WGS | ABySS | XLOC_058827 | 2277578:1324-7471     | cdRNA03-Dia-R2 | cdRNA05-postDia | 38.683   | 6.15685 | -2.65143 | 5.00E-05 | 0.0289221 |
| WGS | ABySS | XLOC_058827 | 2277578:1324-7471     | cdRNA01-preDia | cdRNA03-Dia-R2  | 7.10613  | 38.683  | 2.44456  | 5.00E-05 | 0.0289221 |
| WGS | ABySS | XLOC_058827 | 2277578:1324-7471     | cdRNA01-preDia | cdRNA04-Dia-R3  | 7.10613  | 40.9406 | 2.5264   | 5.00E-05 | 0.0289221 |
| WGS | ABySS | XLOC_058898 | 2277622:51556-59481   | cdRNA04-Dia-R3 | cdRNA05-postDia | 32.7145  | 2.72395 | -3.58616 | 5.00E-05 | 0.0289221 |
| WGS | ABySS | XLOC_058898 | 2277622:51556-59481   | cdRNA03-Dia-R2 | cdRNA05-postDia | 31.7437  | 2.72395 | -3.5427  | 5.00E-05 | 0.0289221 |
| WGS | ABySS | XLOC_058898 | 2277622:51556-59481   | cdRNA01-preDia | cdRNA03-Dia-R2  | 3.13859  | 31.7437 | 3.33828  | 5.00E-05 | 0.0289221 |
| WGS | ABySS | XLOC_058898 | 2277622:51556-59481   | cdRNA01-preDia | cdRNA04-Dia-R3  | 3.13859  | 32.7145 | 3.38174  | 5.00E-05 | 0.0289221 |
| WGS | ABySS | XLOC_058902 | 2277622:59577-62459   | cdRNA04-Dia-R3 | cdRNA05-postDia | 14.6964  | 2.60029 | -2.49872 | 5.00E-05 | 0.0289221 |
| WGS | ABySS | XLOC_058902 | 2277622:59577-62459   | cdRNA03-Dia-R2 | cdRNA05-postDia | 13.8047  | 2.60029 | -2.40841 | 0.0001   | 0.0499641 |
| WGS | ABySS | XLOC_058902 | 2277622:59577-62459   | cdRNA01-preDia | cdRNA03-Dia-R2  | 1.85387  | 13.8047 | 2.89655  | 5.00E-05 | 0.0289221 |
| WGS | ABySS | XLOC_058902 | 2277622:59577-62459   | cdRNA01-preDia | cdRNA04-Dia-R3  | 1.85387  | 14.6964 | 2.98685  | 5.00E-05 | 0.0289221 |
| WGS | ABySS | XLOC_059224 | 2277846:10438-57783   | cdRNA01-preDia | cdRNA03-Dia-R2  | 19.5901  | 4.52434 | -2.11434 | 0.0001   | 0.0499641 |
| WGS | ABySS | XLOC_059900 | 2278205:46987-49131   | cdRNA01-preDia | cdRNA04-Dia-R3  | 54.683   | 3.59797 | -3.92583 | 5.00E-05 | 0.0289221 |
| WGS | ABySS | XLOC_059900 | 2278205:46987-49131   | cdRNA01-preDia | cdRNA03-Dia-R2  | 54.683   | 4.04484 | -3.75694 | 5.00E-05 | 0.0289221 |
| WGS | ABySS | XLOC_059905 | 2278206:29923-33258   | cdRNA03-Dia-R2 | cdRNA05-postDia | 1.89556  | 15.5372 | 3.03503  | 5.00E-05 | 0.0289221 |
| WGS | ABySS | XLOC_059905 | 2278206:29923-33258   | cdRNA04-Dia-R3 | cdRNA05-postDia | 1.51729  | 15.5372 | 3.35616  | 5.00E-05 | 0.0289221 |
| WGS | ABySS | XLOC_059905 | 2278206:29923-33258   | cdRNA02-Dia-R1 | cdRNA05-postDia | 1.29666  | 15.5372 | 3.58285  | 5.00E-05 | 0.0289221 |
| WGS | ABySS | XLOC_059975 | 2278234:4785-9525     | cdRNA01-preDia | cdRNA05-postDia | 16.7331  | 3.07937 | -2.442   | 5.00E-05 | 0.0289221 |
| WGS | ABySS | XLOC_060086 | 2278311:133644-138731 | cdRNA01-preDia | cdRNA05-postDia | 6.41046  | 52.6995 | 3.03929  | 5.00E-05 | 0.0289221 |
| WGS | ABySS | XLOC_060086 | 2278311:133644-138731 | cdRNA03-Dia-R2 | cdRNA05-postDia | 5.63468  | 52.6995 | 3.22538  | 5.00E-05 | 0.0289221 |
| WGS | ABySS | XLOC_060086 | 2278311:133644-138731 | cdRNA04-Dia-R3 | cdRNA05-postDia | 5.09234  | 52.6995 | 3.37139  | 5.00E-05 | 0.0289221 |
| WGS | ABySS | XLOC_060086 | 2278311:133644-138731 | cdRNA02-Dia-R1 | cdRNA05-postDia | 3.70109  | 52.6995 | 3.83177  | 5.00E-05 | 0.0289221 |
| WGS | ABySS | XLOC_060262 | 2278401:988-3433      | cdRNA01-preDia | cdRNA05-postDia | 2.95302  | 22.476  | 2.92812  | 5.00E-05 | 0.0289221 |
| WGS | ABySS | XLOC_060371 | 2278454:916-10707     | cdRNA01-preDia | cdRNA05-postDia | 8.72011  | 43.1093 | 2.30558  | 5.00E-05 | 0.0289221 |
| WGS | ABySS | XLOC_060371 | 2278454:916-10707     | cdRNA02-Dia-R1 | cdRNA05-postDia | 6.52379  | 43.1093 | 2.72421  | 5.00E-05 | 0.0289221 |
| WGS | ABySS | XLOC_060476 | 2278497:836-2878      | cdRNA04-Dia-R3 | cdRNA05-postDia | 11.7218  | 1.59413 | -2.87834 | 5.00E-05 | 0.0289221 |
| WGS | ABySS | XLOC_060476 | 2278497:836-2878      | cdRNA03-Dia-R2 | cdRNA05-postDia | 10.4137  | 1.59413 | -2.70764 | 5.00E-05 | 0.0289221 |
| WGS | ABySS | XLOC_060534 | 2278532:0-2353        | cdRNA01-preDia | cdRNA05-postDia | 2.14841  | 14.9344 | 2.7973   | 5.00E-05 | 0.0289221 |

|     |       |             |                       |                |                 |          |          |          |          |           |
|-----|-------|-------------|-----------------------|----------------|-----------------|----------|----------|----------|----------|-----------|
| WGS | ABySS | XLOC_060581 | 2278551:15325-18302   | cdRNA04-Dia-R3 | cdRNA05-postDia | 15.3448  | 102.889  | 2.74526  | 5.00E-05 | 0.0289221 |
| WGS | ABySS | XLOC_060581 | 2278551:15325-18302   | cdRNA03-Dia-R2 | cdRNA05-postDia | 12.9896  | 102.889  | 2.98566  | 5.00E-05 | 0.0289221 |
| WGS | ABySS | XLOC_060599 | 2278557:32274-37494   | cdRNA02-Dia-R1 | cdRNA05-postDia | 31.7156  | 219.633  | 2.79183  | 5.00E-05 | 0.0289221 |
| WGS | ABySS | XLOC_060657 | 2278578:681-2273      | cdRNA04-Dia-R3 | cdRNA05-postDia | 2.34294  | 13.1044  | 2.48366  | 0.0001   | 0.0499641 |
| WGS | ABySS | XLOC_060736 | 2278617:9381-16186    | cdRNA01-preDia | cdRNA05-postDia | 18.5866  | 3.26989  | -2.50695 | 5.00E-05 | 0.0289221 |
| WGS | ABySS | XLOC_060866 | 2278673:6850-12243    | cdRNA01-preDia | cdRNA04-Dia-R3  | 9.76245  | 0.730608 | -3.74007 | 5.00E-05 | 0.0289221 |
| WGS | ABySS | XLOC_060866 | 2278673:6850-12243    | cdRNA01-preDia | cdRNA03-Dia-R2  | 9.76245  | 0.882727 | -3.4672  | 5.00E-05 | 0.0289221 |
| WGS | ABySS | XLOC_060866 | 2278673:6850-12243    | cdRNA03-Dia-R2 | cdRNA05-postDia | 0.882727 | 6.90682  | 2.96798  | 0.0001   | 0.0499641 |
| WGS | ABySS | XLOC_060866 | 2278673:6850-12243    | cdRNA04-Dia-R3 | cdRNA05-postDia | 0.730608 | 6.90682  | 3.24085  | 5.00E-05 | 0.0289221 |
| WGS | ABySS | XLOC_060894 | 2278686:3286-7397     | cdRNA04-Dia-R3 | cdRNA05-postDia | 117.879  | 10.1103  | -3.54341 | 5.00E-05 | 0.0289221 |
| WGS | ABySS | XLOC_060894 | 2278686:3286-7397     | cdRNA03-Dia-R2 | cdRNA05-postDia | 113.626  | 10.1103  | -3.4904  | 5.00E-05 | 0.0289221 |
| WGS | ABySS | XLOC_060894 | 2278686:3286-7397     | cdRNA01-preDia | cdRNA03-Dia-R2  | 18.6569  | 113.626  | 2.60652  | 5.00E-05 | 0.0289221 |
| WGS | ABySS | XLOC_060894 | 2278686:3286-7397     | cdRNA01-preDia | cdRNA04-Dia-R3  | 18.6569  | 117.879  | 2.65952  | 5.00E-05 | 0.0289221 |
| WGS | ABySS | XLOC_060950 | 2278704:4526-5646     | cdRNA01-preDia | cdRNA05-postDia | 1.81456  | 51.2595  | 4.82013  | 5.00E-05 | 0.0289221 |
| WGS | ABySS | XLOC_060950 | 2278704:4526-5646     | cdRNA03-Dia-R2 | cdRNA05-postDia | 1.68674  | 51.2595  | 4.92551  | 0.0001   | 0.0499641 |
| WGS | ABySS | XLOC_060986 | 2278721:3944-5085     | cdRNA04-Dia-R3 | cdRNA05-postDia | 58.5671  | 12.4268  | -2.23664 | 5.00E-05 | 0.0289221 |
| WGS | ABySS | XLOC_061166 | 2278852:10881-12120   | cdRNA03-Dia-R2 | cdRNA05-postDia | 6.11465  | 46.6183  | 2.93055  | 5.00E-05 | 0.0289221 |
| WGS | ABySS | XLOC_061166 | 2278852:10881-12120   | cdRNA04-Dia-R3 | cdRNA05-postDia | 5.78418  | 46.6183  | 3.01071  | 5.00E-05 | 0.0289221 |
| WGS | ABySS | XLOC_061629 | 2279115:65-5112       | cdRNA01-preDia | cdRNA05-postDia | 1.14047  | 11.0137  | 3.2716   | 5.00E-05 | 0.0289221 |
| WGS | ABySS | XLOC_061864 | 2279205:3852-6664     | cdRNA02-Dia-R1 | cdRNA05-postDia | 5.51927  | 49.2933  | 3.15884  | 5.00E-05 | 0.0289221 |
| WGS | ABySS | XLOC_061864 | 2279205:3852-6664     | cdRNA03-Dia-R2 | cdRNA05-postDia | 2.06067  | 49.2933  | 4.58021  | 5.00E-05 | 0.0289221 |
| WGS | ABySS | XLOC_061864 | 2279205:3852-6664     | cdRNA04-Dia-R3 | cdRNA05-postDia | 1.86299  | 49.2933  | 4.7257   | 5.00E-05 | 0.0289221 |
| WGS | ABySS | XLOC_061864 | 2279205:3852-6664     | cdRNA01-preDia | cdRNA05-postDia | 1.11906  | 49.2933  | 5.46103  | 5.00E-05 | 0.0289221 |
| WGS | ABySS | XLOC_062045 | 2279313:2-9431        | cdRNA03-Dia-R2 | cdRNA05-postDia | 46.7776  | 9.2655   | -2.33588 | 0.0001   | 0.0499641 |
| WGS | ABySS | XLOC_062045 | 2279313:2-9431        | cdRNA04-Dia-R3 | cdRNA05-postDia | 45.1267  | 9.2655   | -2.28404 | 5.00E-05 | 0.0289221 |
| WGS | ABySS | XLOC_062169 | 2279376:17644-18436   | cdRNA03-Dia-R2 | cdRNA05-postDia | 162.732  | 1024.45  | 2.65427  | 5.00E-05 | 0.0289221 |
| WGS | ABySS | XLOC_062169 | 2279376:17644-18436   | cdRNA04-Dia-R3 | cdRNA05-postDia | 150.52   | 1024.45  | 2.76681  | 5.00E-05 | 0.0289221 |
| WGS | ABySS | XLOC_062169 | 2279376:17644-18436   | cdRNA01-preDia | cdRNA05-postDia | 147.472  | 1024.45  | 2.79632  | 5.00E-05 | 0.0289221 |
| WGS | ABySS | XLOC_063107 | 2279907:102-3192      | cdRNA02-Dia-R1 | cdRNA05-postDia | 20.7765  | 162.041  | 2.96334  | 5.00E-05 | 0.0289221 |
| WGS | ABySS | XLOC_063107 | 2279907:102-3192      | cdRNA01-preDia | cdRNA05-postDia | 9.63683  | 162.041  | 4.07166  | 5.00E-05 | 0.0289221 |
| WGS | ABySS | XLOC_063107 | 2279907:102-3192      | cdRNA03-Dia-R2 | cdRNA05-postDia | 7.90236  | 162.041  | 4.35794  | 5.00E-05 | 0.0289221 |
| WGS | ABySS | XLOC_063107 | 2279907:102-3192      | cdRNA04-Dia-R3 | cdRNA05-postDia | 7.38108  | 162.041  | 4.45639  | 5.00E-05 | 0.0289221 |
| WGS | ABySS | XLOC_063550 | 2280150:17317-20191   | cdRNA04-Dia-R3 | cdRNA05-postDia | 2.57438  | 14.1663  | 2.46016  | 0.0001   | 0.0499641 |
| WGS | ABySS | XLOC_063550 | 2280150:17317-20191   | cdRNA03-Dia-R2 | cdRNA05-postDia | 2.28358  | 14.1663  | 2.63309  | 0.0001   | 0.0499641 |
| WGS | ABySS | XLOC_063550 | 2280150:17317-20191   | cdRNA02-Dia-R1 | cdRNA05-postDia | 1.85492  | 14.1663  | 2.93303  | 5.00E-05 | 0.0289221 |
| WGS | ABySS | XLOC_063570 | 2280154:71922-76273   | cdRNA01-preDia | cdRNA03-Dia-R2  | 86.9056  | 17.6109  | -2.30298 | 0.0001   | 0.0499641 |
| WGS | ABySS | XLOC_063682 | 2280216:250595-255478 | cdRNA02-Dia-R1 | cdRNA05-postDia | 0.48189  | 50.3025  | 6.70578  | 5.00E-05 | 0.0289221 |
| WGS | ABySS | XLOC_063830 | 2280316:13961-22067   | cdRNA03-Dia-R2 | cdRNA05-postDia | 21.9956  | 3.15898  | -2.79969 | 5.00E-05 | 0.0289221 |
| WGS | ABySS | XLOC_063830 | 2280316:13961-22067   | cdRNA04-Dia-R3 | cdRNA05-postDia | 20.2385  | 3.15898  | -2.67957 | 0.0001   | 0.0499641 |
| WGS | ABySS | XLOC_065131 | 497136:0-106          | cdRNA04-Dia-R3 | cdRNA05-postDia | 10414.2  | 58535.5  | 2.49077  | 5.00E-05 | 0.0289221 |
| WGS | ABySS | XLOC_065131 | 497136:0-106          | cdRNA03-Dia-R2 | cdRNA05-postDia | 9795.58  | 58535.5  | 2.57911  | 5.00E-05 | 0.0289221 |
| WGS | ABySS | XLOC_065131 | 497136:0-106          | cdRNA02-Dia-R1 | cdRNA05-postDia | 9492.26  | 58535.5  | 2.62449  | 5.00E-05 | 0.0289221 |
| WGS | ABySS | XLOC_065131 | 497136:0-106          | cdRNA01-preDia | cdRNA05-postDia | 8790.63  | 58535.5  | 2.73527  | 5.00E-05 | 0.0289221 |
| WGS | ABySS | XLOC_065291 | 528972:13-798         | cdRNA02-Dia-R1 | cdRNA05-postDia | 194.722  | 1199.23  | 2.62263  | 5.00E-05 | 0.0289221 |
| WGS | ABySS | XLOC_065291 | 528972:13-798         | cdRNA03-Dia-R2 | cdRNA05-postDia | 162.881  | 1199.23  | 2.88022  | 5.00E-05 | 0.0289221 |
| WGS | ABySS | XLOC_065291 | 528972:13-798         | cdRNA04-Dia-R3 | cdRNA05-postDia | 158.66   | 1199.23  | 2.91811  | 5.00E-05 | 0.0289221 |
| WGS | ABySS | XLOC_065413 | 556114:0-95           | cdRNA01-preDia | cdRNA05-postDia | 12332.8  | 64400.5  | 2.38458  | 0.0001   | 0.0499641 |

|         |             |             |                |                |                 |         |         |          |          |           |
|---------|-------------|-------------|----------------|----------------|-----------------|---------|---------|----------|----------|-----------|
| WGS     | ABySS       | XLOC_065432 | 559927:0-118   | cdRNA01-preDia | cdRNA05-postDia | 403.04  | 4097.41 | 3.34572  | 5.00E-05 | 0.0289221 |
| WGS     | ABySS       | XLOC_065634 | 607895:0-119   | cdRNA01-preDia | cdRNA03-Dia-R2  | 359.23  | 4512.51 | 3.65095  | 5.00E-05 | 0.0289221 |
| WGS     | ABySS       | XLOC_065634 | 607895:0-119   | cdRNA01-preDia | cdRNA04-Dia-R3  | 359.23  | 5135.77 | 3.8376   | 5.00E-05 | 0.0289221 |
| WGS     | ABySS       | XLOC_065903 | 668102:0-121   | cdRNA03-Dia-R2 | cdRNA05-postDia | 607.085 | 5056.13 | 3.05806  | 5.00E-05 | 0.0289221 |
| WGS     | ABySS       | XLOC_065903 | 668102:0-121   | cdRNA04-Dia-R3 | cdRNA05-postDia | 590.309 | 5056.13 | 3.09849  | 5.00E-05 | 0.0289221 |
| WGS     | ABySS       | XLOC_066161 | 730060:0-82    | cdRNA01-preDia | cdRNA05-postDia | 41581.3 | 227921  | 2.45453  | 5.00E-05 | 0.0289221 |
| WGS     | ABySS       | XLOC_066241 | 750901:0-80    | cdRNA01-preDia | cdRNA05-postDia | 34603.1 | 201299  | 2.54037  | 0.0001   | 0.0499641 |
| WGS     | ABySS       | XLOC_066907 | 891481:0-89    | cdRNA01-preDia | cdRNA05-postDia | 2549.47 | 30393.1 | 3.57548  | 5.00E-05 | 0.0289221 |
| WGS     | ABySS       | XLOC_067132 | 942480:205-354 | cdRNA03-Dia-R2 | cdRNA05-postDia | 3886.73 | 559.005 | -2.79762 | 5.00E-05 | 0.0289221 |
| WGS     | ABySS       | XLOC_067132 | 942480:205-354 | cdRNA04-Dia-R3 | cdRNA05-postDia | 3269.01 | 559.005 | -2.54792 | 0.0001   | 0.0499641 |
| RNA-Seq | Trans-ABySS | XLOC_000201 | J1748022:2-211 | cdRNA02-Dia-R1 | cdRNA05-postDia | 23.6544 | 657.062 | 4.79585  | 5.00E-05 | 0.0195319 |
| RNA-Seq | Trans-ABySS | XLOC_000227 | J1748303:1-127 | cdRNA01-preDia | cdRNA05-postDia | 439.668 | 3019.25 | 2.7797   | 0.0002   | 0.0481888 |
| RNA-Seq | Trans-ABySS | XLOC_000264 | J1748770:0-539 | cdRNA01-preDia | cdRNA03-Dia-R2  | 149.488 | 26.0982 | -2.518   | 5.00E-05 | 0.0195319 |
| RNA-Seq | Trans-ABySS | XLOC_000264 | J1748770:0-539 | cdRNA04-Dia-R3 | cdRNA05-postDia | 33.0046 | 169.281 | 2.35868  | 0.0001   | 0.0354705 |
| RNA-Seq | Trans-ABySS | XLOC_000264 | J1748770:0-539 | cdRNA03-Dia-R2 | cdRNA05-postDia | 26.0982 | 169.281 | 2.6974   | 5.00E-05 | 0.0195319 |
| RNA-Seq | Trans-ABySS | XLOC_000326 | J1749583:0-70  | cdRNA02-Dia-R1 | cdRNA05-postDia | 5678.86 | 36842.7 | 2.69771  | 0.0002   | 0.0481888 |
| RNA-Seq | Trans-ABySS | XLOC_000326 | J1749583:0-70  | cdRNA03-Dia-R2 | cdRNA05-postDia | 4332.32 | 36842.7 | 3.08817  | 0.00015  | 0.0374403 |
| RNA-Seq | Trans-ABySS | XLOC_000534 | J1752569:0-195 | cdRNA03-Dia-R2 | cdRNA05-postDia | 88.7268 | 501.494 | 2.49879  | 0.0002   | 0.0481888 |
| RNA-Seq | Trans-ABySS | XLOC_000719 | J1754802:0-309 | cdRNA02-Dia-R1 | cdRNA05-postDia | 29.2373 | 151.5   | 2.37343  | 0.00015  | 0.0374403 |
| RNA-Seq | Trans-ABySS | XLOC_000974 | J1757944:0-83  | cdRNA01-preDia | cdRNA04-Dia-R3  | 3312.32 | 19864.9 | 2.5843   | 0.0002   | 0.0481888 |
| RNA-Seq | Trans-ABySS | XLOC_001007 | J1758342:0-92  | cdRNA02-Dia-R1 | cdRNA05-postDia | 1571.5  | 10121.6 | 2.68722  | 0.0002   | 0.0481888 |
| RNA-Seq | Trans-ABySS | XLOC_001165 | J1760352:0-713 | cdRNA03-Dia-R2 | cdRNA05-postDia | 7.27387 | 33.0149 | 2.18232  | 0.0002   | 0.0481888 |
| RNA-Seq | Trans-ABySS | XLOC_001380 | J1762506:0-431 | cdRNA02-Dia-R1 | cdRNA05-postDia | 15.9806 | 99.4173 | 2.63718  | 0.0001   | 0.0354705 |
| RNA-Seq | Trans-ABySS | XLOC_001380 | J1762506:0-431 | cdRNA03-Dia-R2 | cdRNA05-postDia | 11.397  | 99.4173 | 3.12485  | 5.00E-05 | 0.0195319 |
| RNA-Seq | Trans-ABySS | XLOC_001380 | J1762506:0-431 | cdRNA04-Dia-R3 | cdRNA05-postDia | 8.27434 | 99.4173 | 3.58678  | 5.00E-05 | 0.0195319 |
| RNA-Seq | Trans-ABySS | XLOC_001380 | J1762506:0-431 | cdRNA01-preDia | cdRNA05-postDia | 3.61645 | 99.4173 | 4.78085  | 5.00E-05 | 0.0195319 |
| RNA-Seq | Trans-ABySS | XLOC_001571 | J1765090:0-97  | cdRNA03-Dia-R2 | cdRNA05-postDia | 421.535 | 5307.36 | 3.65427  | 0.0002   | 0.0481888 |
| RNA-Seq | Trans-ABySS | XLOC_001826 | J1767702:0-133 | cdRNA02-Dia-R1 | cdRNA05-postDia | 681.728 | 4579.9  | 2.74805  | 5.00E-05 | 0.0195319 |
| RNA-Seq | Trans-ABySS | XLOC_002382 | J1774638:0-122 | cdRNA01-preDia | cdRNA05-postDia | 8249.13 | 1514.66 | -2.44525 | 5.00E-05 | 0.0195319 |
| RNA-Seq | Trans-ABySS | XLOC_002402 | J1774869:0-100 | cdRNA02-Dia-R1 | cdRNA05-postDia | 9157.92 | 729.689 | -3.64967 | 5.00E-05 | 0.0195319 |
| RNA-Seq | Trans-ABySS | XLOC_002402 | J1774869:0-100 | cdRNA01-preDia | cdRNA05-postDia | 5779.55 | 729.689 | -2.9856  | 5.00E-05 | 0.0195319 |
| RNA-Seq | Trans-ABySS | XLOC_002559 | J1776690:0-72  | cdRNA03-Dia-R2 | cdRNA05-postDia | 6169.24 | 36526.4 | 2.56578  | 0.00015  | 0.0374403 |
| RNA-Seq | Trans-ABySS | XLOC_002614 | J1777267:0-96  | cdRNA01-preDia | cdRNA04-Dia-R3  | 3284.98 | 16473.6 | 2.3262   | 0.0001   | 0.0354705 |
| RNA-Seq | Trans-ABySS | XLOC_002689 | J1778311:0-289 | cdRNA02-Dia-R1 | cdRNA05-postDia | 31.296  | 382.126 | 3.61     | 5.00E-05 | 0.0195319 |
| RNA-Seq | Trans-ABySS | XLOC_002689 | J1778311:0-289 | cdRNA01-preDia | cdRNA05-postDia | 16.6942 | 382.126 | 4.51663  | 5.00E-05 | 0.0195319 |
| RNA-Seq | Trans-ABySS | XLOC_002689 | J1778311:0-289 | cdRNA04-Dia-R3 | cdRNA05-postDia | 14.2051 | 382.126 | 4.74957  | 5.00E-05 | 0.0195319 |
| RNA-Seq | Trans-ABySS | XLOC_002689 | J1778311:0-289 | cdRNA03-Dia-R2 | cdRNA05-postDia | 13.3588 | 382.126 | 4.83819  | 5.00E-05 | 0.0195319 |
| RNA-Seq | Trans-ABySS | XLOC_002834 | J1780013:0-82  | cdRNA03-Dia-R2 | cdRNA05-postDia | 62258.7 | 3558.05 | -4.12912 | 5.00E-05 | 0.0195319 |
| RNA-Seq | Trans-ABySS | XLOC_002834 | J1780013:0-82  | cdRNA04-Dia-R3 | cdRNA05-postDia | 49550.3 | 3558.05 | -3.79973 | 5.00E-05 | 0.0195319 |
| RNA-Seq | Trans-ABySS | XLOC_002834 | J1780013:0-82  | cdRNA02-Dia-R1 | cdRNA05-postDia | 39902.7 | 3558.05 | -3.48733 | 5.00E-05 | 0.0195319 |
| RNA-Seq | Trans-ABySS | XLOC_002834 | J1780013:0-82  | cdRNA01-preDia | cdRNA05-postDia | 35031.2 | 3558.05 | -3.29948 | 5.00E-05 | 0.0195319 |
| RNA-Seq | Trans-ABySS | XLOC_002879 | J1780551:0-87  | cdRNA03-Dia-R2 | cdRNA05-postDia | 17754.6 | 2346.8  | -2.91943 | 5.00E-05 | 0.0195319 |
| RNA-Seq | Trans-ABySS | XLOC_002879 | J1780551:0-87  | cdRNA04-Dia-R3 | cdRNA05-postDia | 17353   | 2346.8  | -2.88642 | 5.00E-05 | 0.0195319 |
| RNA-Seq | Trans-ABySS | XLOC_002879 | J1780551:0-87  | cdRNA02-Dia-R1 | cdRNA05-postDia | 12942.9 | 2346.8  | -2.46339 | 0.00015  | 0.0374403 |
| RNA-Seq | Trans-ABySS | XLOC_003074 | J1782712:0-167 | cdRNA02-Dia-R1 | cdRNA05-postDia | 147.392 | 2079.35 | 3.8184   | 5.00E-05 | 0.0195319 |
| RNA-Seq | Trans-ABySS | XLOC_003074 | J1782712:0-167 | cdRNA01-preDia | cdRNA05-postDia | 106.32  | 2079.35 | 4.28964  | 5.00E-05 | 0.0195319 |
| RNA-Seq | Trans-ABySS | XLOC_003074 | J1782712:0-167 | cdRNA03-Dia-R2 | cdRNA05-postDia | 58.1088 | 2079.35 | 5.16123  | 5.00E-05 | 0.0195319 |

|         |             |             |                 |                |                 |         |         |          |          |           |
|---------|-------------|-------------|-----------------|----------------|-----------------|---------|---------|----------|----------|-----------|
| RNA-Seq | Trans-ABySS | XLOC_003074 | J1782712:0-167  | cdRNA04-Dia-R3 | cdRNA05-postDia | 40.9766 | 2079.35 | 5.66519  | 0.0002   | 0.0481888 |
| RNA-Seq | Trans-ABySS | XLOC_003240 | J1784571:2-65   | cdRNA03-Dia-R2 | cdRNA05-postDia | 8952.17 | 68791.4 | 2.94192  | 0.0002   | 0.0481888 |
| RNA-Seq | Trans-ABySS | XLOC_003313 | J1785403:0-116  | cdRNA03-Dia-R2 | cdRNA05-postDia | 6251.85 | 971.782 | -2.68558 | 5.00E-05 | 0.0195319 |
| RNA-Seq | Trans-ABySS | XLOC_003313 | J1785403:0-116  | cdRNA01-preDia | cdRNA05-postDia | 5905.65 | 971.782 | -2.60339 | 5.00E-05 | 0.0195319 |
| RNA-Seq | Trans-ABySS | XLOC_003313 | J1785403:0-116  | cdRNA04-Dia-R3 | cdRNA05-postDia | 5466.07 | 971.782 | -2.4918  | 5.00E-05 | 0.0195319 |
| RNA-Seq | Trans-ABySS | XLOC_003313 | J1785403:0-116  | cdRNA02-Dia-R1 | cdRNA05-postDia | 5279.29 | 971.782 | -2.44164 | 0.0001   | 0.0354705 |
| RNA-Seq | Trans-ABySS | XLOC_003420 | J1786645:0-917  | cdRNA01-preDia | cdRNA04-Dia-R3  | 18.0392 | 2.9937  | -2.59113 | 0.0002   | 0.0481888 |
| RNA-Seq | Trans-ABySS | XLOC_003557 | J1788260:0-112  | cdRNA01-preDia | cdRNA05-postDia | 6222.3  | 1111.95 | -2.48435 | 0.00015  | 0.0374403 |
| RNA-Seq | Trans-ABySS | XLOC_003557 | J1788260:0-112  | cdRNA03-Dia-R2 | cdRNA05-postDia | 5861.85 | 1111.95 | -2.39826 | 0.0002   | 0.0481888 |
| RNA-Seq | Trans-ABySS | XLOC_003596 | J1788722:0-498  | cdRNA03-Dia-R2 | cdRNA05-postDia | 18.055  | 93.8044 | 2.37726  | 0.0002   | 0.0481888 |
| RNA-Seq | Trans-ABySS | XLOC_003596 | J1788722:0-498  | cdRNA01-preDia | cdRNA05-postDia | 10.2386 | 93.8044 | 3.19563  | 5.00E-05 | 0.0195319 |
| RNA-Seq | Trans-ABySS | XLOC_003618 | J1788994:1-261  | cdRNA02-Dia-R1 | cdRNA05-postDia | 82.56   | 439.93  | 2.41376  | 0.0002   | 0.0481888 |
| RNA-Seq | Trans-ABySS | XLOC_003754 | J1790788:0-288  | cdRNA02-Dia-R1 | cdRNA05-postDia | 34.985  | 256.227 | 2.87261  | 5.00E-05 | 0.0195319 |
| RNA-Seq | Trans-ABySS | XLOC_003754 | J1790788:0-288  | cdRNA01-preDia | cdRNA05-postDia | 21.9639 | 256.227 | 3.54422  | 5.00E-05 | 0.0195319 |
| RNA-Seq | Trans-ABySS | XLOC_003936 | J1792933:0-74   | cdRNA04-Dia-R3 | cdRNA05-postDia | 14337   | 71860.2 | 2.32545  | 0.0001   | 0.0354705 |
| RNA-Seq | Trans-ABySS | XLOC_003936 | J1792933:0-74   | cdRNA02-Dia-R1 | cdRNA05-postDia | 12306.5 | 71860.2 | 2.54577  | 0.0001   | 0.0354705 |
| RNA-Seq | Trans-ABySS | XLOC_003936 | J1792933:0-74   | cdRNA01-preDia | cdRNA05-postDia | 3713.34 | 71860.2 | 4.2744   | 5.00E-05 | 0.0195319 |
| RNA-Seq | Trans-ABySS | XLOC_004008 | J1793707:1-86   | cdRNA03-Dia-R2 | cdRNA05-postDia | 1433.13 | 19468.5 | 3.7639   | 5.00E-05 | 0.0195319 |
| RNA-Seq | Trans-ABySS | XLOC_004008 | J1793707:1-86   | cdRNA04-Dia-R3 | cdRNA05-postDia | 1269.94 | 19468.5 | 3.93831  | 5.00E-05 | 0.0195319 |
| RNA-Seq | Trans-ABySS | XLOC_004019 | J1793821:0-100  | cdRNA02-Dia-R1 | cdRNA05-postDia | 6780.91 | 65453.1 | 3.27091  | 5.00E-05 | 0.0195319 |
| RNA-Seq | Trans-ABySS | XLOC_004102 | J1794886:0-562  | cdRNA01-preDia | cdRNA05-postDia | 105.232 | 719.576 | 2.77358  | 0.00015  | 0.0374403 |
| RNA-Seq | Trans-ABySS | XLOC_004254 | J1796749:0-76   | cdRNA03-Dia-R2 | cdRNA05-postDia | 5338.79 | 38111.8 | 2.83565  | 5.00E-05 | 0.0195319 |
| RNA-Seq | Trans-ABySS | XLOC_004254 | J1796749:0-76   | cdRNA04-Dia-R3 | cdRNA05-postDia | 4087.45 | 38111.8 | 3.22097  | 5.00E-05 | 0.0195319 |
| RNA-Seq | Trans-ABySS | XLOC_004280 | J1797084:0-74   | cdRNA01-preDia | cdRNA05-postDia | 5686.05 | 40047.7 | 2.81622  | 5.00E-05 | 0.0195319 |
| RNA-Seq | Trans-ABySS | XLOC_004434 | J1798645:0-122  | cdRNA03-Dia-R2 | cdRNA05-postDia | 918.465 | 4875.96 | 2.40839  | 0.00015  | 0.0374403 |
| RNA-Seq | Trans-ABySS | XLOC_004434 | J1798645:0-122  | cdRNA02-Dia-R1 | cdRNA05-postDia | 895.966 | 4875.96 | 2.44417  | 0.0002   | 0.0481888 |
| RNA-Seq | Trans-ABySS | XLOC_004451 | J1798883:0-65   | cdRNA01-preDia | cdRNA05-postDia | 77983.9 | 6161.41 | -3.66184 | 0.0002   | 0.0481888 |
| RNA-Seq | Trans-ABySS | XLOC_004779 | J1802829:0-64   | cdRNA01-preDia | cdRNA05-postDia | 10865.6 | 62774.6 | 2.53041  | 5.00E-05 | 0.0195319 |
| RNA-Seq | Trans-ABySS | XLOC_004909 | J1804132:0-69   | cdRNA03-Dia-R2 | cdRNA05-postDia | 8116.33 | 51386.9 | 2.6625   | 0.0001   | 0.0354705 |
| RNA-Seq | Trans-ABySS | XLOC_005241 | J1807750:0-1135 | cdRNA01-preDia | cdRNA05-postDia | 1.76365 | 20.0029 | 3.50357  | 5.00E-05 | 0.0195319 |
| RNA-Seq | Trans-ABySS | XLOC_005448 | J1810141:0-65   | cdRNA03-Dia-R2 | cdRNA05-postDia | 39887   | 248600  | 2.63983  | 5.00E-05 | 0.0195319 |
| RNA-Seq | Trans-ABySS | XLOC_005448 | J1810141:0-65   | cdRNA04-Dia-R3 | cdRNA05-postDia | 34045.8 | 248600  | 2.86828  | 5.00E-05 | 0.0195319 |
| RNA-Seq | Trans-ABySS | XLOC_005645 | J1812338:0-371  | cdRNA02-Dia-R1 | cdRNA05-postDia | 30.3087 | 623.166 | 4.36181  | 5.00E-05 | 0.0195319 |
| RNA-Seq | Trans-ABySS | XLOC_005645 | J1812338:0-371  | cdRNA01-preDia | cdRNA05-postDia | 14.7172 | 623.166 | 5.40404  | 5.00E-05 | 0.0195319 |
| RNA-Seq | Trans-ABySS | XLOC_005645 | J1812338:0-371  | cdRNA04-Dia-R3 | cdRNA05-postDia | 7.90796 | 623.166 | 6.30017  | 5.00E-05 | 0.0195319 |
| RNA-Seq | Trans-ABySS | XLOC_005645 | J1812338:0-371  | cdRNA03-Dia-R2 | cdRNA05-postDia | 7.46348 | 623.166 | 6.38362  | 5.00E-05 | 0.0195319 |
| RNA-Seq | Trans-ABySS | XLOC_005648 | J1812358:0-95   | cdRNA01-preDia | cdRNA05-postDia | 4618.86 | 25096.1 | 2.44185  | 5.00E-05 | 0.0195319 |
| RNA-Seq | Trans-ABySS | XLOC_005648 | J1812358:0-95   | cdRNA04-Dia-R3 | cdRNA05-postDia | 4115.92 | 25096.1 | 2.60817  | 5.00E-05 | 0.0195319 |
| RNA-Seq | Trans-ABySS | XLOC_005648 | J1812358:0-95   | cdRNA02-Dia-R1 | cdRNA05-postDia | 4100.65 | 25096.1 | 2.61354  | 0.0001   | 0.0354705 |
| RNA-Seq | Trans-ABySS | XLOC_005648 | J1812358:0-95   | cdRNA03-Dia-R2 | cdRNA05-postDia | 3836.67 | 25096.1 | 2.70953  | 5.00E-05 | 0.0195319 |
| RNA-Seq | Trans-ABySS | XLOC_005894 | J1814908:1-156  | cdRNA01-preDia | cdRNA05-postDia | 981.91  | 124.859 | -2.97529 | 0.00015  | 0.0374403 |
| RNA-Seq | Trans-ABySS | XLOC_005954 | J1815624:0-89   | cdRNA02-Dia-R1 | cdRNA05-postDia | 4895.47 | 36842.1 | 2.91184  | 5.00E-05 | 0.0195319 |
| RNA-Seq | Trans-ABySS | XLOC_005954 | J1815624:0-89   | cdRNA03-Dia-R2 | cdRNA05-postDia | 4348.14 | 36842.1 | 3.08288  | 5.00E-05 | 0.0195319 |
| RNA-Seq | Trans-ABySS | XLOC_005954 | J1815624:0-89   | cdRNA04-Dia-R3 | cdRNA05-postDia | 3838.04 | 36842.1 | 3.26291  | 5.00E-05 | 0.0195319 |
| RNA-Seq | Trans-ABySS | XLOC_005954 | J1815624:0-89   | cdRNA01-preDia | cdRNA05-postDia | 1122.25 | 36842.1 | 5.03689  | 5.00E-05 | 0.0195319 |
| RNA-Seq | Trans-ABySS | XLOC_005985 | J1816018:0-352  | cdRNA01-preDia | cdRNA03-Dia-R2  | 204.526 | 34.7882 | -2.55561 | 0.0001   | 0.0354705 |
| RNA-Seq | Trans-ABySS | XLOC_006100 | J1817537:0-78   | cdRNA04-Dia-R3 | cdRNA05-postDia | 29510.6 | 155253  | 2.39531  | 0.00015  | 0.0374403 |

|         |             |             |                 |                |                 |         |         |          |          |           |
|---------|-------------|-------------|-----------------|----------------|-----------------|---------|---------|----------|----------|-----------|
| RNA-Seq | Trans-ABySS | XLOC_006100 | J1817537:0-78   | cdRNA03-Dia-R2 | cdRNA05-postDia | 28657.4 | 155253  | 2.43764  | 0.0001   | 0.0354705 |
| RNA-Seq | Trans-ABySS | XLOC_006350 | J1820068:1-147  | cdRNA02-Dia-R1 | cdRNA05-postDia | 368.708 | 2666.69 | 2.8545   | 5.00E-05 | 0.0195319 |
| RNA-Seq | Trans-ABySS | XLOC_006350 | J1820068:1-147  | cdRNA01-preDia | cdRNA05-postDia | 192.954 | 2666.69 | 3.78872  | 5.00E-05 | 0.0195319 |
| RNA-Seq | Trans-ABySS | XLOC_006350 | J1820068:1-147  | cdRNA04-Dia-R3 | cdRNA05-postDia | 117.148 | 2666.69 | 4.50865  | 5.00E-05 | 0.0195319 |
| RNA-Seq | Trans-ABySS | XLOC_006350 | J1820068:1-147  | cdRNA03-Dia-R2 | cdRNA05-postDia | 91.8072 | 2666.69 | 4.8603   | 5.00E-05 | 0.0195319 |
| RNA-Seq | Trans-ABySS | XLOC_006511 | J1821889:2-68   | cdRNA02-Dia-R1 | cdRNA05-postDia | 35152.6 | 211439  | 2.58853  | 5.00E-05 | 0.0195319 |
| RNA-Seq | Trans-ABySS | XLOC_006511 | J1821889:2-68   | cdRNA03-Dia-R2 | cdRNA05-postDia | 18528.5 | 211439  | 3.51242  | 5.00E-05 | 0.0195319 |
| RNA-Seq | Trans-ABySS | XLOC_006511 | J1821889:2-68   | cdRNA04-Dia-R3 | cdRNA05-postDia | 18192.7 | 211439  | 3.53881  | 5.00E-05 | 0.0195319 |
| RNA-Seq | Trans-ABySS | XLOC_006546 | J1822273:0-107  | cdRNA03-Dia-R2 | cdRNA05-postDia | 13029.5 | 1064.24 | -3.61389 | 5.00E-05 | 0.0195319 |
| RNA-Seq | Trans-ABySS | XLOC_006546 | J1822273:0-107  | cdRNA04-Dia-R3 | cdRNA05-postDia | 10784.9 | 1064.24 | -3.34112 | 5.00E-05 | 0.0195319 |
| RNA-Seq | Trans-ABySS | XLOC_006546 | J1822273:0-107  | cdRNA02-Dia-R1 | cdRNA05-postDia | 8144.37 | 1064.24 | -2.93598 | 0.0001   | 0.0354705 |
| RNA-Seq | Trans-ABySS | XLOC_006546 | J1822273:0-107  | cdRNA01-preDia | cdRNA05-postDia | 7199.21 | 1064.24 | -2.75802 | 0.00015  | 0.0374403 |
| RNA-Seq | Trans-ABySS | XLOC_006635 | J1823168:1-83   | cdRNA04-Dia-R3 | cdRNA05-postDia | 1896.37 | 13596.8 | 2.84196  | 0.00015  | 0.0374403 |
| RNA-Seq | Trans-ABySS | XLOC_006656 | J1823424:1-235  | cdRNA04-Dia-R3 | cdRNA05-postDia | 16.1247 | 179.573 | 3.47722  | 0.0002   | 0.0481888 |
| RNA-Seq | Trans-ABySS | XLOC_006945 | J1825996:0-82   | cdRNA04-Dia-R3 | cdRNA05-postDia | 3242.18 | 18743.3 | 2.53134  | 0.00015  | 0.0374403 |
| RNA-Seq | Trans-ABySS | XLOC_006985 | J1826298:0-261  | cdRNA02-Dia-R1 | cdRNA05-postDia | 67.5895 | 468.563 | 2.79337  | 5.00E-05 | 0.0195319 |
| RNA-Seq | Trans-ABySS | XLOC_007003 | J1826443:15-372 | cdRNA01-preDia | cdRNA03-Dia-R2  | 642.213 | 40.6539 | -3.98159 | 5.00E-05 | 0.0195319 |
| RNA-Seq | Trans-ABySS | XLOC_007003 | J1826443:15-372 | cdRNA01-preDia | cdRNA04-Dia-R3  | 642.213 | 51.69   | -3.6351  | 5.00E-05 | 0.0195319 |
| RNA-Seq | Trans-ABySS | XLOC_007003 | J1826443:15-372 | cdRNA01-preDia | cdRNA02-Dia-R1  | 642.213 | 106.053 | -2.59827 | 5.00E-05 | 0.0195319 |
| RNA-Seq | Trans-ABySS | XLOC_007173 | J1827670:0-213  | cdRNA01-preDia | cdRNA04-Dia-R3  | 40.5697 | 298.883 | 2.88111  | 0.0002   | 0.0481888 |
| RNA-Seq | Trans-ABySS | XLOC_007173 | J1827670:0-213  | cdRNA01-preDia | cdRNA03-Dia-R2  | 40.5697 | 311.027 | 2.93856  | 5.00E-05 | 0.0195319 |
| RNA-Seq | Trans-ABySS | XLOC_007189 | J1827802:0-77   | cdRNA01-preDia | cdRNA05-postDia | 19343.9 | 3402.85 | -2.50706 | 0.0002   | 0.0481888 |
| RNA-Seq | Trans-ABySS | XLOC_007440 | J1829907:0-214  | cdRNA02-Dia-R1 | cdRNA05-postDia | 159.361 | 1170.74 | 2.87705  | 5.00E-05 | 0.0195319 |
| RNA-Seq | Trans-ABySS | XLOC_007440 | J1829907:0-214  | cdRNA04-Dia-R3 | cdRNA05-postDia | 60.2776 | 1170.74 | 4.27966  | 5.00E-05 | 0.0195319 |
| RNA-Seq | Trans-ABySS | XLOC_007440 | J1829907:0-214  | cdRNA01-preDia | cdRNA05-postDia | 63.1119 | 1170.74 | 4.21337  | 5.00E-05 | 0.0195319 |
| RNA-Seq | Trans-ABySS | XLOC_007440 | J1829907:0-214  | cdRNA03-Dia-R2 | cdRNA05-postDia | 59.2058 | 1170.74 | 4.30554  | 5.00E-05 | 0.0195319 |
| RNA-Seq | Trans-ABySS | XLOC_007479 | J1830264:0-312  | cdRNA02-Dia-R1 | cdRNA05-postDia | 78.5566 | 1887.73 | 4.58678  | 5.00E-05 | 0.0195319 |
| RNA-Seq | Trans-ABySS | XLOC_007479 | J1830264:0-312  | cdRNA01-preDia | cdRNA05-postDia | 45.302  | 1887.73 | 5.38094  | 5.00E-05 | 0.0195319 |
| RNA-Seq | Trans-ABySS | XLOC_007479 | J1830264:0-312  | cdRNA04-Dia-R3 | cdRNA05-postDia | 28.9106 | 1887.73 | 6.02891  | 5.00E-05 | 0.0195319 |
| RNA-Seq | Trans-ABySS | XLOC_007479 | J1830264:0-312  | cdRNA03-Dia-R2 | cdRNA05-postDia | 27.7924 | 1887.73 | 6.08582  | 5.00E-05 | 0.0195319 |
| RNA-Seq | Trans-ABySS | XLOC_007673 | J1831685:0-127  | cdRNA02-Dia-R1 | cdRNA05-postDia | 346.952 | 4139.42 | 3.57662  | 5.00E-05 | 0.0195319 |
| RNA-Seq | Trans-ABySS | XLOC_007673 | J1831685:0-127  | cdRNA01-preDia | cdRNA05-postDia | 117.775 | 4139.42 | 5.13533  | 0.0002   | 0.0481888 |
| RNA-Seq | Trans-ABySS | XLOC_007726 | J1832045:0-92   | cdRNA01-preDia | cdRNA05-postDia | 7394.77 | 43276.1 | 2.54899  | 5.00E-05 | 0.0195319 |
| RNA-Seq | Trans-ABySS | XLOC_007726 | J1832045:0-92   | cdRNA04-Dia-R3 | cdRNA05-postDia | 7128.04 | 43276.1 | 2.60199  | 5.00E-05 | 0.0195319 |
| RNA-Seq | Trans-ABySS | XLOC_007726 | J1832045:0-92   | cdRNA03-Dia-R2 | cdRNA05-postDia | 6800.52 | 43276.1 | 2.66985  | 5.00E-05 | 0.0195319 |
| RNA-Seq | Trans-ABySS | XLOC_007772 | J1832405:5-563  | cdRNA01-preDia | cdRNA04-Dia-R3  | 27.4426 | 2.05006 | -3.74268 | 0.0001   | 0.0354705 |
| RNA-Seq | Trans-ABySS | XLOC_007772 | J1832405:5-563  | cdRNA01-preDia | cdRNA03-Dia-R2  | 27.4426 | 3.40221 | -3.01187 | 0.0001   | 0.0354705 |
| RNA-Seq | Trans-ABySS | XLOC_008084 | J1834745:0-227  | cdRNA04-Dia-R3 | cdRNA05-postDia | 92.0129 | 637.119 | 2.79166  | 5.00E-05 | 0.0195319 |
| RNA-Seq | Trans-ABySS | XLOC_008084 | J1834745:0-227  | cdRNA03-Dia-R2 | cdRNA05-postDia | 80.6382 | 637.119 | 2.98203  | 5.00E-05 | 0.0195319 |
| RNA-Seq | Trans-ABySS | XLOC_008111 | J1834930:0-82   | cdRNA01-preDia | cdRNA05-postDia | 2091.41 | 19505.7 | 3.22135  | 5.00E-05 | 0.0195319 |
| RNA-Seq | Trans-ABySS | XLOC_008111 | J1834930:0-82   | cdRNA02-Dia-R1 | cdRNA05-postDia | 1877.21 | 19505.7 | 3.37724  | 5.00E-05 | 0.0195319 |
| RNA-Seq | Trans-ABySS | XLOC_008111 | J1834930:0-82   | cdRNA03-Dia-R2 | cdRNA05-postDia | 1598.02 | 19505.7 | 3.60954  | 0.00015  | 0.0374403 |
| RNA-Seq | Trans-ABySS | XLOC_008186 | J1835384:0-84   | cdRNA01-preDia | cdRNA05-postDia | 7149.33 | 37329.5 | 2.38444  | 5.00E-05 | 0.0195319 |
| RNA-Seq | Trans-ABySS | XLOC_008434 | J1836519:0-112  | cdRNA02-Dia-R1 | cdRNA05-postDia | 280.795 | 3439.64 | 3.61467  | 0.0002   | 0.0481888 |
| RNA-Seq | Trans-ABySS | XLOC_008454 | J1836589:0-109  | cdRNA01-preDia | cdRNA05-postDia | 667.983 | 6560.41 | 3.2959   | 5.00E-05 | 0.0195319 |
| RNA-Seq | Trans-ABySS | XLOC_008454 | J1836589:0-109  | cdRNA02-Dia-R1 | cdRNA05-postDia | 618.095 | 6560.41 | 3.40789  | 5.00E-05 | 0.0195319 |
| RNA-Seq | Trans-ABySS | XLOC_008454 | J1836589:0-109  | cdRNA04-Dia-R3 | cdRNA05-postDia | 432.848 | 6560.41 | 3.92185  | 5.00E-05 | 0.0195319 |

|         |             |             |                 |                |                 |         |         |          |          |           |
|---------|-------------|-------------|-----------------|----------------|-----------------|---------|---------|----------|----------|-----------|
| RNA-Seq | Trans-ABySS | XLOC_008454 | J1836589:0-109  | cdRNA03-Dia-R2 | cdRNA05-postDia | 301.526 | 6560.41 | 4.44343  | 5.00E-05 | 0.0195319 |
| RNA-Seq | Trans-ABySS | XLOC_008506 | J1836904:0-87   | cdRNA02-Dia-R1 | cdRNA05-postDia | 11165   | 60829.1 | 2.44577  | 0.0002   | 0.0481888 |
| RNA-Seq | Trans-ABySS | XLOC_008506 | J1836904:0-87   | cdRNA01-preDia | cdRNA05-postDia | 4490.09 | 60829.1 | 3.75995  | 5.00E-05 | 0.0195319 |
| RNA-Seq | Trans-ABySS | XLOC_008520 | J1837060:0-296  | cdRNA02-Dia-R1 | cdRNA05-postDia | 191.86  | 1265.36 | 2.72142  | 0.0002   | 0.0481888 |
| RNA-Seq | Trans-ABySS | XLOC_008520 | J1837060:0-296  | cdRNA01-preDia | cdRNA05-postDia | 156.781 | 1265.36 | 3.01273  | 5.00E-05 | 0.0195319 |
| RNA-Seq | Trans-ABySS | XLOC_008635 | R1745638:0-148  | cdRNA04-Dia-R3 | cdRNA05-postDia | 5135.42 | 46325.9 | 3.17327  | 5.00E-05 | 0.0195319 |
| RNA-Seq | Trans-ABySS | XLOC_008635 | R1745638:0-148  | cdRNA03-Dia-R2 | cdRNA05-postDia | 4916.08 | 46325.9 | 3.23624  | 5.00E-05 | 0.0195319 |
| RNA-Seq | Trans-ABySS | XLOC_008693 | R1745736:0-74   | cdRNA01-preDia | cdRNA05-postDia | 9979.6  | 58548.6 | 2.55258  | 0.00015  | 0.0374403 |
| RNA-Seq | Trans-ABySS | XLOC_008700 | R1745751:0-100  | cdRNA03-Dia-R2 | cdRNA05-postDia | 17177.9 | 120326  | 2.80832  | 0.0001   | 0.0354705 |
| RNA-Seq | Trans-ABySS | XLOC_008700 | R1745751:0-100  | cdRNA04-Dia-R3 | cdRNA05-postDia | 16158.5 | 120326  | 2.89658  | 5.00E-05 | 0.0195319 |
| RNA-Seq | Trans-ABySS | XLOC_008707 | R1745764:0-589  | cdRNA01-preDia | cdRNA03-Dia-R2  | 4533.18 | 236.822 | -4.25865 | 5.00E-05 | 0.0195319 |
| RNA-Seq | Trans-ABySS | XLOC_008707 | R1745764:0-589  | cdRNA01-preDia | cdRNA04-Dia-R3  | 4533.18 | 246.379 | -4.20157 | 5.00E-05 | 0.0195319 |
| RNA-Seq | Trans-ABySS | XLOC_008719 | R1745786:0-60   | cdRNA03-Dia-R2 | cdRNA05-postDia | 73786.5 | 430105  | 2.54326  | 5.00E-05 | 0.0195319 |
| RNA-Seq | Trans-ABySS | XLOC_008719 | R1745786:0-60   | cdRNA04-Dia-R3 | cdRNA05-postDia | 63049   | 430105  | 2.77014  | 5.00E-05 | 0.0195319 |
| RNA-Seq | Trans-ABySS | XLOC_008755 | R1745864:0-73   | cdRNA03-Dia-R2 | cdRNA05-postDia | 12196.5 | 62820.2 | 2.36476  | 0.0001   | 0.0354705 |
| RNA-Seq | Trans-ABySS | XLOC_008787 | R1745934:10-519 | cdRNA02-Dia-R1 | cdRNA05-postDia | 39.7568 | 317.347 | 2.99679  | 5.00E-05 | 0.0195319 |
| RNA-Seq | Trans-ABySS | XLOC_008787 | R1745934:10-519 | cdRNA03-Dia-R2 | cdRNA05-postDia | 30.4202 | 317.347 | 3.38296  | 5.00E-05 | 0.0195319 |
| RNA-Seq | Trans-ABySS | XLOC_008787 | R1745934:10-519 | cdRNA04-Dia-R3 | cdRNA05-postDia | 28.2728 | 317.347 | 3.48857  | 5.00E-05 | 0.0195319 |
| RNA-Seq | Trans-ABySS | XLOC_008787 | R1745934:10-519 | cdRNA01-preDia | cdRNA05-postDia | 28.1128 | 317.347 | 3.49676  | 5.00E-05 | 0.0195319 |
| RNA-Seq | Trans-ABySS | XLOC_008788 | R1745935:3-416  | cdRNA03-Dia-R2 | cdRNA05-postDia | 868.946 | 66.6036 | -3.7056  | 5.00E-05 | 0.0195319 |
| RNA-Seq | Trans-ABySS | XLOC_008788 | R1745935:3-416  | cdRNA04-Dia-R3 | cdRNA05-postDia | 847.73  | 66.6036 | -3.66993 | 5.00E-05 | 0.0195319 |
| RNA-Seq | Trans-ABySS | XLOC_008788 | R1745935:3-416  | cdRNA02-Dia-R1 | cdRNA05-postDia | 430.17  | 66.6036 | -2.69124 | 5.00E-05 | 0.0195319 |
| RNA-Seq | Trans-ABySS | XLOC_008800 | R1745967:0-119  | cdRNA01-preDia | cdRNA05-postDia | 1596.49 | 11772.5 | 2.88244  | 5.00E-05 | 0.0195319 |
| RNA-Seq | Trans-ABySS | XLOC_008800 | R1745967:0-119  | cdRNA02-Dia-R1 | cdRNA05-postDia | 1402.22 | 11772.5 | 3.06963  | 5.00E-05 | 0.0195319 |
| RNA-Seq | Trans-ABySS | XLOC_008800 | R1745967:0-119  | cdRNA03-Dia-R2 | cdRNA05-postDia | 855.887 | 11772.5 | 3.78185  | 5.00E-05 | 0.0195319 |
| RNA-Seq | Trans-ABySS | XLOC_008800 | R1745967:0-119  | cdRNA04-Dia-R3 | cdRNA05-postDia | 608.789 | 11772.5 | 4.27333  | 5.00E-05 | 0.0195319 |
| RNA-Seq | Trans-ABySS | XLOC_008802 | R1745969:0-82   | cdRNA01-preDia | cdRNA05-postDia | 8823.15 | 49876.2 | 2.49899  | 0.0001   | 0.0354705 |
| RNA-Seq | Trans-ABySS | XLOC_008817 | R1745994:0-62   | cdRNA01-preDia | cdRNA05-postDia | 18902.7 | 165778  | 3.13259  | 0.0002   | 0.0481888 |
| RNA-Seq | Trans-ABySS | XLOC_008831 | R1746024:0-68   | cdRNA01-preDia | cdRNA05-postDia | 25493.4 | 153154  | 2.58679  | 5.00E-05 | 0.0195319 |
| RNA-Seq | Trans-ABySS | XLOC_008840 | R1746042:0-1917 | cdRNA01-preDia | cdRNA05-postDia | 20.7149 | 154.064 | 2.89479  | 5.00E-05 | 0.0195319 |
| RNA-Seq | Trans-ABySS | XLOC_008841 | R1746043:0-81   | cdRNA02-Dia-R1 | cdRNA05-postDia | 8270.27 | 64144.7 | 2.95532  | 5.00E-05 | 0.0195319 |
| RNA-Seq | Trans-ABySS | XLOC_008841 | R1746043:0-81   | cdRNA04-Dia-R3 | cdRNA05-postDia | 5875.56 | 64144.7 | 3.44853  | 5.00E-05 | 0.0195319 |
| RNA-Seq | Trans-ABySS | XLOC_008841 | R1746043:0-81   | cdRNA03-Dia-R2 | cdRNA05-postDia | 5866.59 | 64144.7 | 3.45074  | 5.00E-05 | 0.0195319 |
| RNA-Seq | Trans-ABySS | XLOC_008841 | R1746043:0-81   | cdRNA01-preDia | cdRNA05-postDia | 1813.46 | 64144.7 | 5.14451  | 5.00E-05 | 0.0195319 |
| RNA-Seq | Trans-ABySS | XLOC_008867 | R1746093:0-177  | cdRNA01-preDia | cdRNA05-postDia | 390.892 | 3008.18 | 2.94405  | 5.00E-05 | 0.0195319 |
| RNA-Seq | Trans-ABySS | XLOC_008871 | R1746098:0-84   | cdRNA04-Dia-R3 | cdRNA05-postDia | 12951.7 | 1457.31 | -3.15176 | 0.0001   | 0.0354705 |
| RNA-Seq | Trans-ABySS | XLOC_008873 | R1746100:0-90   | cdRNA01-preDia | cdRNA05-postDia | 2779.95 | 30006.1 | 3.43212  | 5.00E-05 | 0.0195319 |
| RNA-Seq | Trans-ABySS | XLOC_008884 | R1746125:0-66   | cdRNA03-Dia-R2 | cdRNA05-postDia | 4331.34 | 44966.6 | 3.37597  | 0.0002   | 0.0481888 |
| RNA-Seq | Trans-ABySS | XLOC_008887 | R1746129:0-94   | cdRNA02-Dia-R1 | cdRNA05-postDia | 19020.1 | 2294.17 | -3.05148 | 5.00E-05 | 0.0195319 |
| RNA-Seq | Trans-ABySS | XLOC_008887 | R1746129:0-94   | cdRNA01-preDia | cdRNA05-postDia | 14392   | 2294.17 | -2.64922 | 0.0001   | 0.0354705 |
| RNA-Seq | Trans-ABySS | XLOC_008931 | R1746216:0-108  | cdRNA01-preDia | cdRNA03-Dia-R2  | 1693.1  | 9028.99 | 2.4149   | 0.0001   | 0.0354705 |
| RNA-Seq | Trans-ABySS | XLOC_008931 | R1746216:0-108  | cdRNA01-preDia | cdRNA04-Dia-R3  | 1693.1  | 9341.5  | 2.46399  | 5.00E-05 | 0.0195319 |
| RNA-Seq | Trans-ABySS | XLOC_008933 | R1746221:7-1510 | cdRNA01-preDia | cdRNA04-Dia-R3  | 17.4154 | 125.015 | 2.84367  | 5.00E-05 | 0.0195319 |
| RNA-Seq | Trans-ABySS | XLOC_008933 | R1746221:7-1510 | cdRNA01-preDia | cdRNA03-Dia-R2  | 17.4154 | 134.305 | 2.94707  | 5.00E-05 | 0.0195319 |
| RNA-Seq | Trans-ABySS | XLOC_008935 | R1746224:0-2132 | cdRNA02-Dia-R1 | cdRNA05-postDia | 37.145  | 609.952 | 4.03746  | 5.00E-05 | 0.0195319 |
| RNA-Seq | Trans-ABySS | XLOC_008935 | R1746224:0-2132 | cdRNA01-preDia | cdRNA05-postDia | 18.0974 | 609.952 | 5.07484  | 5.00E-05 | 0.0195319 |
| RNA-Seq | Trans-ABySS | XLOC_008935 | R1746224:0-2132 | cdRNA04-Dia-R3 | cdRNA05-postDia | 11.4477 | 609.952 | 5.73557  | 5.00E-05 | 0.0195319 |

|         |             |             |                 |                |                 |         |         |          |          |           |
|---------|-------------|-------------|-----------------|----------------|-----------------|---------|---------|----------|----------|-----------|
| RNA-Seq | Trans-ABySS | XLOC_008935 | R1746224:0-2132 | cdRNA03-Dia-R2 | cdRNA05-postDia | 11.2446 | 609.952 | 5.7614   | 5.00E-05 | 0.0195319 |
| RNA-Seq | Trans-ABySS | XLOC_008941 | R1746243:0-619  | cdRNA01-preDia | cdRNA02-Dia-R1  | 15.1664 | 86.1198 | 2.50547  | 0.0001   | 0.0354705 |
| RNA-Seq | Trans-ABySS | XLOC_008941 | R1746243:0-619  | cdRNA01-preDia | cdRNA05-postDia | 15.1664 | 286.868 | 4.24144  | 5.00E-05 | 0.0195319 |
| RNA-Seq | Trans-ABySS | XLOC_008964 | R1746292:0-839  | cdRNA01-preDia | cdRNA05-postDia | 32.4654 | 166.116 | 2.35521  | 0.00015  | 0.0374403 |
| RNA-Seq | Trans-ABySS | XLOC_008973 | R1746310:0-112  | cdRNA03-Dia-R2 | cdRNA05-postDia | 2669.9  | 15878.7 | 2.57223  | 5.00E-05 | 0.0195319 |
| RNA-Seq | Trans-ABySS | XLOC_008973 | R1746310:0-112  | cdRNA01-preDia | cdRNA05-postDia | 1723.33 | 15878.7 | 3.20382  | 5.00E-05 | 0.0195319 |
| RNA-Seq | Trans-ABySS | XLOC_008985 | R1746328:0-1541 | cdRNA03-Dia-R2 | cdRNA05-postDia | 128.486 | 20.6278 | -2.63894 | 5.00E-05 | 0.0195319 |
| RNA-Seq | Trans-ABySS | XLOC_008985 | R1746328:0-1541 | cdRNA04-Dia-R3 | cdRNA05-postDia | 123.729 | 20.6278 | -2.58452 | 0.0001   | 0.0354705 |
| RNA-Seq | Trans-ABySS | XLOC_008985 | R1746328:0-1541 | cdRNA01-preDia | cdRNA03-Dia-R2  | 20.707  | 128.486 | 2.63341  | 0.0002   | 0.0481888 |
| RNA-Seq | Trans-ABySS | XLOC_008994 | R1746341:0-63   | cdRNA01-preDia | cdRNA05-postDia | 16546.3 | 129711  | 2.97072  | 0.0002   | 0.0481888 |
| RNA-Seq | Trans-ABySS | XLOC_008996 | R1746343:0-79   | cdRNA01-preDia | cdRNA05-postDia | 3433.54 | 22356.3 | 2.70291  | 0.00015  | 0.0374403 |
| RNA-Seq | Trans-ABySS | XLOC_008999 | R1746351:0-836  | cdRNA02-Dia-R1 | cdRNA05-postDia | 9.99206 | 116.04  | 3.5377   | 5.00E-05 | 0.0195319 |
| RNA-Seq | Trans-ABySS | XLOC_008999 | R1746351:0-836  | cdRNA04-Dia-R3 | cdRNA05-postDia | 3.64757 | 116.04  | 4.99155  | 5.00E-05 | 0.0195319 |
| RNA-Seq | Trans-ABySS | XLOC_008999 | R1746351:0-836  | cdRNA03-Dia-R2 | cdRNA05-postDia | 3.31733 | 116.04  | 5.12846  | 5.00E-05 | 0.0195319 |
| RNA-Seq | Trans-ABySS | XLOC_008999 | R1746351:0-836  | cdRNA01-preDia | cdRNA05-postDia | 3.31968 | 116.04  | 5.12744  | 5.00E-05 | 0.0195319 |
| RNA-Seq | Trans-ABySS | XLOC_009004 | R1746356:6-2691 | cdRNA03-Dia-R2 | cdRNA05-postDia | 28.4262 | 261.483 | 3.20142  | 0.0002   | 0.0481888 |
| RNA-Seq | Trans-ABySS | XLOC_009004 | R1746356:6-2691 | cdRNA04-Dia-R3 | cdRNA05-postDia | 27.6345 | 261.483 | 3.24217  | 0.00015  | 0.0374403 |
| RNA-Seq | Trans-ABySS | XLOC_009023 | R1746393:0-88   | cdRNA03-Dia-R2 | cdRNA05-postDia | 2052.57 | 11753.5 | 2.51759  | 0.0002   | 0.0481888 |
| RNA-Seq | Trans-ABySS | XLOC_009043 | R1746432:0-83   | cdRNA02-Dia-R1 | cdRNA05-postDia | 6731.05 | 36553.8 | 2.44112  | 0.00015  | 0.0374403 |
| RNA-Seq | Trans-ABySS | XLOC_009043 | R1746432:0-83   | cdRNA01-preDia | cdRNA05-postDia | 2208.21 | 36553.8 | 4.04907  | 5.00E-05 | 0.0195319 |
| RNA-Seq | Trans-ABySS | XLOC_009045 | R1746434:1-2067 | cdRNA03-Dia-R2 | cdRNA05-postDia | 256.556 | 28.0519 | -3.19311 | 5.00E-05 | 0.0195319 |
| RNA-Seq | Trans-ABySS | XLOC_009045 | R1746434:1-2067 | cdRNA04-Dia-R3 | cdRNA05-postDia | 256.006 | 28.0519 | -3.19001 | 5.00E-05 | 0.0195319 |
| RNA-Seq | Trans-ABySS | XLOC_009051 | R1746442:0-311  | cdRNA02-Dia-R1 | cdRNA05-postDia | 91.142  | 611.229 | 2.74553  | 5.00E-05 | 0.0195319 |
| RNA-Seq | Trans-ABySS | XLOC_009051 | R1746442:0-311  | cdRNA04-Dia-R3 | cdRNA05-postDia | 67.6339 | 611.229 | 3.1759   | 5.00E-05 | 0.0195319 |
| RNA-Seq | Trans-ABySS | XLOC_009051 | R1746442:0-311  | cdRNA03-Dia-R2 | cdRNA05-postDia | 51.176  | 611.229 | 3.57818  | 5.00E-05 | 0.0195319 |
| RNA-Seq | Trans-ABySS | XLOC_009055 | R1746446:0-144  | cdRNA04-Dia-R3 | cdRNA05-postDia | 623.153 | 3690.81 | 2.56628  | 5.00E-05 | 0.0195319 |
| RNA-Seq | Trans-ABySS | XLOC_009055 | R1746446:0-144  | cdRNA01-preDia | cdRNA05-postDia | 605.245 | 3690.81 | 2.60835  | 5.00E-05 | 0.0195319 |
| RNA-Seq | Trans-ABySS | XLOC_009055 | R1746446:0-144  | cdRNA03-Dia-R2 | cdRNA05-postDia | 597.328 | 3690.81 | 2.62734  | 5.00E-05 | 0.0195319 |
| RNA-Seq | Trans-ABySS | XLOC_009062 | R1746463:0-87   | cdRNA01-preDia | cdRNA05-postDia | 1641.54 | 15113.4 | 3.20271  | 5.00E-05 | 0.0195319 |
| RNA-Seq | Trans-ABySS | XLOC_009062 | R1746463:0-87   | cdRNA02-Dia-R1 | cdRNA05-postDia | 1493.41 | 15113.4 | 3.33914  | 0.0001   | 0.0354705 |
| RNA-Seq | Trans-ABySS | XLOC_009070 | R1746478:0-128  | cdRNA03-Dia-R2 | cdRNA05-postDia | 669.546 | 5426.57 | 3.01879  | 5.00E-05 | 0.0195319 |
| RNA-Seq | Trans-ABySS | XLOC_009070 | R1746478:0-128  | cdRNA02-Dia-R1 | cdRNA05-postDia | 626.995 | 5426.57 | 3.11352  | 5.00E-05 | 0.0195319 |
| RNA-Seq | Trans-ABySS | XLOC_009070 | R1746478:0-128  | cdRNA04-Dia-R3 | cdRNA05-postDia | 460.038 | 5426.57 | 3.56022  | 5.00E-05 | 0.0195319 |
| RNA-Seq | Trans-ABySS | XLOC_009070 | R1746478:0-128  | cdRNA01-preDia | cdRNA05-postDia | 149.205 | 5426.57 | 5.18467  | 5.00E-05 | 0.0195319 |
| RNA-Seq | Trans-ABySS | XLOC_009096 | R1746529:0-101  | cdRNA01-preDia | cdRNA05-postDia | 5072.47 | 721.073 | -2.81447 | 0.00015  | 0.0374403 |
| RNA-Seq | Trans-ABySS | XLOC_009115 | R1746577:21-575 | cdRNA01-preDia | cdRNA04-Dia-R3  | 129.008 | 9.87954 | -3.70687 | 5.00E-05 | 0.0195319 |
| RNA-Seq | Trans-ABySS | XLOC_009115 | R1746577:21-575 | cdRNA01-preDia | cdRNA03-Dia-R2  | 129.008 | 10.8331 | -3.57395 | 5.00E-05 | 0.0195319 |
| RNA-Seq | Trans-ABySS | XLOC_009115 | R1746577:21-575 | cdRNA01-preDia | cdRNA02-Dia-R1  | 129.008 | 16.8909 | -2.93314 | 5.00E-05 | 0.0195319 |
| RNA-Seq | Trans-ABySS | XLOC_009115 | R1746577:21-575 | cdRNA02-Dia-R1 | cdRNA05-postDia | 16.8909 | 144.798 | 3.09972  | 5.00E-05 | 0.0195319 |
| RNA-Seq | Trans-ABySS | XLOC_009115 | R1746577:21-575 | cdRNA03-Dia-R2 | cdRNA05-postDia | 10.8331 | 144.798 | 3.74052  | 5.00E-05 | 0.0195319 |
| RNA-Seq | Trans-ABySS | XLOC_009115 | R1746577:21-575 | cdRNA04-Dia-R3 | cdRNA05-postDia | 9.87954 | 144.798 | 3.87345  | 5.00E-05 | 0.0195319 |
| RNA-Seq | Trans-ABySS | XLOC_009120 | R1746588:0-342  | cdRNA01-preDia | cdRNA03-Dia-R2  | 17.7111 | 100.403 | 2.50308  | 0.0002   | 0.0481888 |
| RNA-Seq | Trans-ABySS | XLOC_009126 | R1746598:0-137  | cdRNA03-Dia-R2 | cdRNA05-postDia | 857.184 | 5398.38 | 2.65485  | 5.00E-05 | 0.0195319 |
| RNA-Seq | Trans-ABySS | XLOC_009126 | R1746598:0-137  | cdRNA04-Dia-R3 | cdRNA05-postDia | 807.815 | 5398.38 | 2.74043  | 5.00E-05 | 0.0195319 |
| RNA-Seq | Trans-ABySS | XLOC_009126 | R1746598:0-137  | cdRNA02-Dia-R1 | cdRNA05-postDia | 734.168 | 5398.38 | 2.87834  | 5.00E-05 | 0.0195319 |
| RNA-Seq | Trans-ABySS | XLOC_009126 | R1746598:0-137  | cdRNA01-preDia | cdRNA05-postDia | 361.281 | 5398.38 | 3.90133  | 5.00E-05 | 0.0195319 |
| RNA-Seq | Trans-ABySS | XLOC_009137 | R1746620:1-237  | cdRNA02-Dia-R1 | cdRNA05-postDia | 129.603 | 2342.57 | 4.17592  | 5.00E-05 | 0.0195319 |

|         |             |             |                 |                |                 |         |         |          |          |           |
|---------|-------------|-------------|-----------------|----------------|-----------------|---------|---------|----------|----------|-----------|
| RNA-Seq | Trans-ABySS | XLOC_009137 | R1746620:1-237  | cdRNA01-preDia | cdRNA05-postDia | 62.3833 | 2342.57 | 5.23079  | 5.00E-05 | 0.0195319 |
| RNA-Seq | Trans-ABySS | XLOC_009137 | R1746620:1-237  | cdRNA04-Dia-R3 | cdRNA05-postDia | 42.7032 | 2342.57 | 5.7776   | 5.00E-05 | 0.0195319 |
| RNA-Seq | Trans-ABySS | XLOC_009137 | R1746620:1-237  | cdRNA03-Dia-R2 | cdRNA05-postDia | 40.9787 | 2342.57 | 5.83707  | 5.00E-05 | 0.0195319 |
| RNA-Seq | Trans-ABySS | XLOC_009139 | R1746627:0-86   | cdRNA03-Dia-R2 | cdRNA05-postDia | 12708   | 1342.73 | -3.24249 | 0.0002   | 0.0481888 |
| RNA-Seq | Trans-ABySS | XLOC_009139 | R1746627:0-86   | cdRNA04-Dia-R3 | cdRNA05-postDia | 10294.4 | 1342.73 | -2.93862 | 0.0002   | 0.0481888 |
| RNA-Seq | Trans-ABySS | XLOC_009162 | R1746668:0-96   | cdRNA01-preDia | cdRNA05-postDia | 3405.53 | 19161   | 2.49222  | 5.00E-05 | 0.0195319 |
| RNA-Seq | Trans-ABySS | XLOC_009162 | R1746668:0-96   | cdRNA02-Dia-R1 | cdRNA05-postDia | 2707.84 | 19161   | 2.82295  | 5.00E-05 | 0.0195319 |
| RNA-Seq | Trans-ABySS | XLOC_009171 | R1746684:0-108  | cdRNA01-preDia | cdRNA05-postDia | 1603.98 | 12890.4 | 3.00656  | 5.00E-05 | 0.0195319 |
| RNA-Seq | Trans-ABySS | XLOC_009181 | R1746705:0-1007 | cdRNA02-Dia-R1 | cdRNA05-postDia | 32.6702 | 203.642 | 2.63999  | 0.0002   | 0.0481888 |
| RNA-Seq | Trans-ABySS | XLOC_009181 | R1746705:0-1007 | cdRNA03-Dia-R2 | cdRNA05-postDia | 25.1647 | 203.642 | 3.01656  | 5.00E-05 | 0.0195319 |
| RNA-Seq | Trans-ABySS | XLOC_009181 | R1746705:0-1007 | cdRNA04-Dia-R3 | cdRNA05-postDia | 25.1463 | 203.642 | 3.01762  | 5.00E-05 | 0.0195319 |
| RNA-Seq | Trans-ABySS | XLOC_009185 | R1746712:0-972  | cdRNA04-Dia-R3 | cdRNA05-postDia | 70.5389 | 8.42914 | -3.06496 | 5.00E-05 | 0.0195319 |
| RNA-Seq | Trans-ABySS | XLOC_009185 | R1746712:0-972  | cdRNA03-Dia-R2 | cdRNA05-postDia | 68.4797 | 8.42914 | -3.02222 | 5.00E-05 | 0.0195319 |
| RNA-Seq | Trans-ABySS | XLOC_009185 | R1746712:0-972  | cdRNA01-preDia | cdRNA05-postDia | 67.0487 | 8.42914 | -2.99175 | 5.00E-05 | 0.0195319 |
| RNA-Seq | Trans-ABySS | XLOC_009185 | R1746712:0-972  | cdRNA02-Dia-R1 | cdRNA05-postDia | 46.6242 | 8.42914 | -2.46762 | 5.00E-05 | 0.0195319 |
| RNA-Seq | Trans-ABySS | XLOC_009200 | R1746738:0-99   | cdRNA03-Dia-R2 | cdRNA05-postDia | 1331.52 | 7915.65 | 2.57164  | 0.00015  | 0.0374403 |
| RNA-Seq | Trans-ABySS | XLOC_009200 | R1746738:0-99   | cdRNA04-Dia-R3 | cdRNA05-postDia | 1200.77 | 7915.65 | 2.72075  | 5.00E-05 | 0.0195319 |
| RNA-Seq | Trans-ABySS | XLOC_009200 | R1746738:0-99   | cdRNA01-preDia | cdRNA05-postDia | 1178.16 | 7915.65 | 2.74817  | 0.0001   | 0.0354705 |
| RNA-Seq | Trans-ABySS | XLOC_009204 | R1746745:0-934  | cdRNA01-preDia | cdRNA05-postDia | 488.399 | 4.79839 | -6.66936 | 5.00E-05 | 0.0195319 |
| RNA-Seq | Trans-ABySS | XLOC_009204 | R1746745:0-934  | cdRNA02-Dia-R1 | cdRNA05-postDia | 101.323 | 4.79839 | -4.40027 | 5.00E-05 | 0.0195319 |
| RNA-Seq | Trans-ABySS | XLOC_009204 | R1746745:0-934  | cdRNA03-Dia-R2 | cdRNA05-postDia | 94.7147 | 4.79839 | -4.30297 | 5.00E-05 | 0.0195319 |
| RNA-Seq | Trans-ABySS | XLOC_009204 | R1746745:0-934  | cdRNA04-Dia-R3 | cdRNA05-postDia | 90.5266 | 4.79839 | -4.23772 | 5.00E-05 | 0.0195319 |
| RNA-Seq | Trans-ABySS | XLOC_009225 | R1746782:0-156  | cdRNA03-Dia-R2 | cdRNA05-postDia | 75.1254 | 986.483 | 3.71492  | 0.00015  | 0.0374403 |
| RNA-Seq | Trans-ABySS | XLOC_009244 | R1746818:0-321  | cdRNA02-Dia-R1 | cdRNA05-postDia | 15.5119 | 403.56  | 4.70133  | 5.00E-05 | 0.0195319 |
| RNA-Seq | Trans-ABySS | XLOC_009244 | R1746818:0-321  | cdRNA04-Dia-R3 | cdRNA05-postDia | 5.73503 | 403.56  | 6.13684  | 0.0002   | 0.0481888 |
| RNA-Seq | Trans-ABySS | XLOC_009244 | R1746818:0-321  | cdRNA03-Dia-R2 | cdRNA05-postDia | 4.49446 | 403.56  | 6.48849  | 0.0002   | 0.0481888 |
| RNA-Seq | Trans-ABySS | XLOC_009269 | R1746866:0-67   | cdRNA01-preDia | cdRNA05-postDia | 8612.62 | 73637.5 | 3.09592  | 0.00015  | 0.0374403 |
| RNA-Seq | Trans-ABySS | XLOC_009281 | R1746883:0-1257 | cdRNA03-Dia-R2 | cdRNA05-postDia | 338.52  | 27.9598 | -3.59782 | 5.00E-05 | 0.0195319 |
| RNA-Seq | Trans-ABySS | XLOC_009281 | R1746883:0-1257 | cdRNA04-Dia-R3 | cdRNA05-postDia | 328.428 | 27.9598 | -3.55416 | 5.00E-05 | 0.0195319 |
| RNA-Seq | Trans-ABySS | XLOC_009321 | R1746959:0-332  | cdRNA01-preDia | cdRNA05-postDia | 21.8389 | 144.164 | 2.72273  | 0.0002   | 0.0481888 |
| RNA-Seq | Trans-ABySS | XLOC_009321 | R1746959:0-332  | cdRNA03-Dia-R2 | cdRNA05-postDia | 17.9141 | 144.164 | 3.00854  | 5.00E-05 | 0.0195319 |
| RNA-Seq | Trans-ABySS | XLOC_009321 | R1746959:0-332  | cdRNA02-Dia-R1 | cdRNA05-postDia | 14.5273 | 144.164 | 3.31087  | 5.00E-05 | 0.0195319 |
| RNA-Seq | Trans-ABySS | XLOC_009329 | R1746979:0-2242 | cdRNA01-preDia | cdRNA03-Dia-R2  | 5.57259 | 55.6178 | 3.31913  | 5.00E-05 | 0.0195319 |
| RNA-Seq | Trans-ABySS | XLOC_009329 | R1746979:0-2242 | cdRNA01-preDia | cdRNA04-Dia-R3  | 5.57259 | 57.2491 | 3.36083  | 5.00E-05 | 0.0195319 |
| RNA-Seq | Trans-ABySS | XLOC_009338 | R1746992:0-64   | cdRNA01-preDia | cdRNA05-postDia | 7761.16 | 72734.1 | 3.22829  | 5.00E-05 | 0.0195319 |
| RNA-Seq | Trans-ABySS | XLOC_009352 | R1747013:0-378  | cdRNA02-Dia-R1 | cdRNA05-postDia | 22.5533 | 296.942 | 3.71877  | 5.00E-05 | 0.0195319 |
| RNA-Seq | Trans-ABySS | XLOC_009352 | R1747013:0-378  | cdRNA01-preDia | cdRNA05-postDia | 3.66433 | 296.942 | 6.34049  | 5.00E-05 | 0.0195319 |
| RNA-Seq | Trans-ABySS | XLOC_009352 | R1747013:0-378  | cdRNA03-Dia-R2 | cdRNA05-postDia | 3.32783 | 296.942 | 6.47945  | 0.0001   | 0.0354705 |
| RNA-Seq | Trans-ABySS | XLOC_009365 | R1747031:0-379  | cdRNA03-Dia-R2 | cdRNA05-postDia | 28.3135 | 207.726 | 2.87512  | 5.00E-05 | 0.0195319 |
| RNA-Seq | Trans-ABySS | XLOC_009388 | R1747071:0-941  | cdRNA01-preDia | cdRNA03-Dia-R2  | 13.9861 | 104.891 | 2.90683  | 5.00E-05 | 0.0195319 |
| RNA-Seq | Trans-ABySS | XLOC_009397 | R1747094:0-1764 | cdRNA03-Dia-R2 | cdRNA05-postDia | 61.2502 | 10.545  | -2.53816 | 0.0002   | 0.0481888 |
| RNA-Seq | Trans-ABySS | XLOC_009424 | R1747152:0-143  | cdRNA03-Dia-R2 | cdRNA05-postDia | 132.709 | 1220.19 | 3.20076  | 0.00015  | 0.0374403 |
| RNA-Seq | Trans-ABySS | XLOC_009426 | R1747155:0-792  | cdRNA02-Dia-R1 | cdRNA05-postDia | 10.7397 | 57.988  | 2.4328   | 0.0001   | 0.0354705 |
| RNA-Seq | Trans-ABySS | XLOC_009426 | R1747155:0-792  | cdRNA01-preDia | cdRNA05-postDia | 4.7316  | 57.988  | 3.61536  | 5.00E-05 | 0.0195319 |
| RNA-Seq | Trans-ABySS | XLOC_009430 | R1747159:0-1103 | cdRNA01-preDia | cdRNA04-Dia-R3  | 40.6379 | 225.703 | 2.47353  | 0.00015  | 0.0374403 |
| RNA-Seq | Trans-ABySS | XLOC_009438 | R1747171:0-125  | cdRNA02-Dia-R1 | cdRNA05-postDia | 683.164 | 4086.19 | 2.58045  | 0.0001   | 0.0354705 |
| RNA-Seq | Trans-ABySS | XLOC_009438 | R1747171:0-125  | cdRNA04-Dia-R3 | cdRNA05-postDia | 506.471 | 4086.19 | 3.01221  | 5.00E-05 | 0.0195319 |



|         |             |             |                 |                |                 |         |         |          |          |           |
|---------|-------------|-------------|-----------------|----------------|-----------------|---------|---------|----------|----------|-----------|
| RNA-Seq | Trans-ABySS | XLOC_009438 | R1747171:0-125  | cdRNA01-preDia | cdRNA05-postDia | 483.131 | 4086.19 | 3.08027  | 5.00E-05 | 0.0195319 |
| RNA-Seq | Trans-ABySS | XLOC_009484 | R1747255:0-596  | cdRNA02-Dia-R1 | cdRNA05-postDia | 25.9636 | 499.152 | 4.26492  | 5.00E-05 | 0.0195319 |
| RNA-Seq | Trans-ABySS | XLOC_009484 | R1747255:0-596  | cdRNA01-preDia | cdRNA05-postDia | 7.21367 | 499.152 | 6.1126   | 5.00E-05 | 0.0195319 |
| RNA-Seq | Trans-ABySS | XLOC_009484 | R1747255:0-596  | cdRNA03-Dia-R2 | cdRNA05-postDia | 6.6     | 499.152 | 6.24087  | 5.00E-05 | 0.0195319 |
| RNA-Seq | Trans-ABySS | XLOC_009484 | R1747255:0-596  | cdRNA04-Dia-R3 | cdRNA05-postDia | 5.33619 | 499.152 | 6.54752  | 5.00E-05 | 0.0195319 |
| RNA-Seq | Trans-ABySS | XLOC_009501 | R1747280:0-67   | cdRNA01-preDia | cdRNA05-postDia | 9716.81 | 70631.9 | 2.86177  | 5.00E-05 | 0.0195319 |
| RNA-Seq | Trans-ABySS | XLOC_009501 | R1747280:0-67   | cdRNA02-Dia-R1 | cdRNA05-postDia | 8782.59 | 70631.9 | 3.0076   | 0.0002   | 0.0481888 |
| RNA-Seq | Trans-ABySS | XLOC_009501 | R1747280:0-67   | cdRNA03-Dia-R2 | cdRNA05-postDia | 7775.44 | 70631.9 | 3.18332  | 0.00015  | 0.0374403 |
| RNA-Seq | Trans-ABySS | XLOC_009501 | R1747280:0-67   | cdRNA04-Dia-R3 | cdRNA05-postDia | 5374.22 | 70631.9 | 3.71619  | 5.00E-05 | 0.0195319 |
| RNA-Seq | Trans-ABySS | XLOC_009509 | R1747289:0-63   | cdRNA02-Dia-R1 | cdRNA05-postDia | 11408.1 | 90695.1 | 2.99096  | 5.00E-05 | 0.0195319 |
| RNA-Seq | Trans-ABySS | XLOC_009509 | R1747289:0-63   | cdRNA03-Dia-R2 | cdRNA05-postDia | 7919.23 | 90695.1 | 3.51759  | 0.00015  | 0.0374403 |
| RNA-Seq | Trans-ABySS | XLOC_009509 | R1747289:0-63   | cdRNA04-Dia-R3 | cdRNA05-postDia | 5601.75 | 90695.1 | 4.01708  | 0.0002   | 0.0481888 |
| RNA-Seq | Trans-ABySS | XLOC_009514 | R1747297:0-355  | cdRNA01-preDia | cdRNA05-postDia | 18.0437 | 123.081 | 2.77004  | 5.00E-05 | 0.0195319 |
| RNA-Seq | Trans-ABySS | XLOC_009522 | R1747313:0-963  | cdRNA02-Dia-R1 | cdRNA04-Dia-R3  | 46.5575 | 4.27465 | -3.44514 | 5.00E-05 | 0.0195319 |
| RNA-Seq | Trans-ABySS | XLOC_009522 | R1747313:0-963  | cdRNA02-Dia-R1 | cdRNA03-Dia-R2  | 46.5575 | 5.11312 | -3.18674 | 5.00E-05 | 0.0195319 |
| RNA-Seq | Trans-ABySS | XLOC_009523 | R1747314:0-824  | cdRNA04-Dia-R3 | cdRNA05-postDia | 137.503 | 18.3794 | -2.9033  | 5.00E-05 | 0.0195319 |
| RNA-Seq | Trans-ABySS | XLOC_009523 | R1747314:0-824  | cdRNA03-Dia-R2 | cdRNA05-postDia | 135.909 | 18.3794 | -2.88648 | 5.00E-05 | 0.0195319 |
| RNA-Seq | Trans-ABySS | XLOC_009524 | R1747315:0-103  | cdRNA04-Dia-R3 | cdRNA05-postDia | 1169.83 | 6586.72 | 2.49326  | 5.00E-05 | 0.0195319 |
| RNA-Seq | Trans-ABySS | XLOC_009524 | R1747315:0-103  | cdRNA03-Dia-R2 | cdRNA05-postDia | 879.249 | 6586.72 | 2.90522  | 5.00E-05 | 0.0195319 |
| RNA-Seq | Trans-ABySS | XLOC_009524 | R1747315:0-103  | cdRNA02-Dia-R1 | cdRNA05-postDia | 629.795 | 6586.72 | 3.38661  | 5.00E-05 | 0.0195319 |
| RNA-Seq | Trans-ABySS | XLOC_009524 | R1747315:0-103  | cdRNA01-preDia | cdRNA05-postDia | 613.952 | 6586.72 | 3.42336  | 5.00E-05 | 0.0195319 |
| RNA-Seq | Trans-ABySS | XLOC_009532 | R1747337:0-604  | cdRNA04-Dia-R3 | cdRNA05-postDia | 119.851 | 18.179  | -2.7209  | 5.00E-05 | 0.0195319 |
| RNA-Seq | Trans-ABySS | XLOC_009532 | R1747337:0-604  | cdRNA03-Dia-R2 | cdRNA05-postDia | 110.96  | 18.179  | -2.6097  | 5.00E-05 | 0.0195319 |
| RNA-Seq | Trans-ABySS | XLOC_009540 | R1747353:1-110  | cdRNA01-preDia | cdRNA05-postDia | 479.577 | 3679.83 | 2.9398   | 0.0001   | 0.0354705 |
| RNA-Seq | Trans-ABySS | XLOC_009541 | R1747355:0-500  | cdRNA01-preDia | cdRNA04-Dia-R3  | 79.0445 | 7.35521 | -3.42583 | 5.00E-05 | 0.0195319 |
| RNA-Seq | Trans-ABySS | XLOC_009541 | R1747355:0-500  | cdRNA01-preDia | cdRNA03-Dia-R2  | 79.0445 | 7.38417 | -3.42016 | 5.00E-05 | 0.0195319 |
| RNA-Seq | Trans-ABySS | XLOC_009541 | R1747355:0-500  | cdRNA01-preDia | cdRNA02-Dia-R1  | 79.0445 | 9.53217 | -3.05179 | 5.00E-05 | 0.0195319 |
| RNA-Seq | Trans-ABySS | XLOC_009541 | R1747355:0-500  | cdRNA01-preDia | cdRNA05-postDia | 79.0445 | 15.5784 | -2.34312 | 0.00015  | 0.0374403 |
| RNA-Seq | Trans-ABySS | XLOC_009542 | R1747356:0-142  | cdRNA03-Dia-R2 | cdRNA05-postDia | 312.579 | 2101.47 | 2.7491   | 5.00E-05 | 0.0195319 |
| RNA-Seq | Trans-ABySS | XLOC_009542 | R1747356:0-142  | cdRNA02-Dia-R1 | cdRNA05-postDia | 299.572 | 2101.47 | 2.81042  | 5.00E-05 | 0.0195319 |
| RNA-Seq | Trans-ABySS | XLOC_009542 | R1747356:0-142  | cdRNA01-preDia | cdRNA05-postDia | 92.9748 | 2101.47 | 4.49841  | 5.00E-05 | 0.0195319 |
| RNA-Seq | Trans-ABySS | XLOC_009546 | R1747366:0-119  | cdRNA01-preDia | cdRNA05-postDia | 591.293 | 3621.41 | 2.61461  | 0.00015  | 0.0374403 |
| RNA-Seq | Trans-ABySS | XLOC_009546 | R1747366:0-119  | cdRNA04-Dia-R3 | cdRNA05-postDia | 442.756 | 3621.41 | 3.03197  | 5.00E-05 | 0.0195319 |
| RNA-Seq | Trans-ABySS | XLOC_009546 | R1747366:0-119  | cdRNA03-Dia-R2 | cdRNA05-postDia | 358.547 | 3621.41 | 3.33632  | 5.00E-05 | 0.0195319 |
| RNA-Seq | Trans-ABySS | XLOC_009563 | R1747394:0-822  | cdRNA04-Dia-R3 | cdRNA05-postDia | 179.948 | 30.9945 | -2.53749 | 0.00015  | 0.0374403 |
| RNA-Seq | Trans-ABySS | XLOC_009586 | R1747430:0-966  | cdRNA01-preDia | cdRNA04-Dia-R3  | 20.3508 | 135.41  | 2.73417  | 5.00E-05 | 0.0195319 |
| RNA-Seq | Trans-ABySS | XLOC_009586 | R1747430:0-966  | cdRNA01-preDia | cdRNA03-Dia-R2  | 20.3508 | 136.574 | 2.74653  | 5.00E-05 | 0.0195319 |
| RNA-Seq | Trans-ABySS | XLOC_009586 | R1747430:0-966  | cdRNA01-preDia | cdRNA05-postDia | 20.3508 | 178.406 | 3.132    | 5.00E-05 | 0.0195319 |
| RNA-Seq | Trans-ABySS | XLOC_009611 | R1747467:3-425  | cdRNA04-Dia-R3 | cdRNA05-postDia | 32.1126 | 162.699 | 2.34099  | 0.0001   | 0.0354705 |
| RNA-Seq | Trans-ABySS | XLOC_009611 | R1747467:3-425  | cdRNA03-Dia-R2 | cdRNA05-postDia | 29.8721 | 162.699 | 2.44534  | 0.00015  | 0.0374403 |
| RNA-Seq | Trans-ABySS | XLOC_009611 | R1747467:3-425  | cdRNA01-preDia | cdRNA05-postDia | 16.9452 | 162.699 | 3.26326  | 5.00E-05 | 0.0195319 |
| RNA-Seq | Trans-ABySS | XLOC_009633 | R1747509:0-258  | cdRNA01-preDia | cdRNA03-Dia-R2  | 69.7001 | 440.686 | 2.66052  | 5.00E-05 | 0.0195319 |
| RNA-Seq | Trans-ABySS | XLOC_009633 | R1747509:0-258  | cdRNA01-preDia | cdRNA04-Dia-R3  | 69.7001 | 456.011 | 2.70984  | 5.00E-05 | 0.0195319 |
| RNA-Seq | Trans-ABySS | XLOC_009649 | R1747533:10-960 | cdRNA01-preDia | cdRNA05-postDia | 422.776 | 45.1717 | -3.2264  | 5.00E-05 | 0.0195319 |
| RNA-Seq | Trans-ABySS | XLOC_009650 | R1747534:0-63   | cdRNA01-preDia | cdRNA05-postDia | 54567.7 | 286460  | 2.39221  | 0.0002   | 0.0481888 |
| RNA-Seq | Trans-ABySS | XLOC_009651 | R1747537:0-590  | cdRNA02-Dia-R1 | cdRNA05-postDia | 16.882  | 96.8333 | 2.52002  | 0.00015  | 0.0374403 |
| RNA-Seq | Trans-ABySS | XLOC_009651 | R1747537:0-590  | cdRNA04-Dia-R3 | cdRNA05-postDia | 3.42843 | 96.8333 | 4.81988  | 5.00E-05 | 0.0195319 |

|         |             |             |                 |                |                 |         |         |          |          |           |
|---------|-------------|-------------|-----------------|----------------|-----------------|---------|---------|----------|----------|-----------|
| RNA-Seq | Trans-ABySS | XLOC_009651 | R1747537:0-590  | cdRNA03-Dia-R2 | cdRNA05-postDia | 2.77348 | 96.8333 | 5.12573  | 5.00E-05 | 0.0195319 |
| RNA-Seq | Trans-ABySS | XLOC_009669 | R1747576:0-657  | cdRNA04-Dia-R3 | cdRNA05-postDia | 42.407  | 6.75363 | -2.65057 | 5.00E-05 | 0.0195319 |
| RNA-Seq | Trans-ABySS | XLOC_009669 | R1747576:0-657  | cdRNA03-Dia-R2 | cdRNA05-postDia | 39.1912 | 6.75363 | -2.53679 | 5.00E-05 | 0.0195319 |
| RNA-Seq | Trans-ABySS | XLOC_009708 | R1747653:0-185  | cdRNA01-preDia | cdRNA05-postDia | 264.115 | 1450.8  | 2.45761  | 0.0001   | 0.0354705 |
| RNA-Seq | Trans-ABySS | XLOC_009708 | R1747653:0-185  | cdRNA02-Dia-R1 | cdRNA05-postDia | 215.072 | 1450.8  | 2.75395  | 5.00E-05 | 0.0195319 |
| RNA-Seq | Trans-ABySS | XLOC_009750 | R1747725:0-1008 | cdRNA01-preDia | cdRNA03-Dia-R2  | 24.7904 | 3.107   | -2.99619 | 5.00E-05 | 0.0195319 |
| RNA-Seq | Trans-ABySS | XLOC_009750 | R1747725:0-1008 | cdRNA01-preDia | cdRNA04-Dia-R3  | 24.7904 | 4.14159 | -2.58152 | 5.00E-05 | 0.0195319 |
| RNA-Seq | Trans-ABySS | XLOC_009750 | R1747725:0-1008 | cdRNA01-preDia | cdRNA05-postDia | 24.7904 | 251.258 | 3.34132  | 5.00E-05 | 0.0195319 |
| RNA-Seq | Trans-ABySS | XLOC_009750 | R1747725:0-1008 | cdRNA02-Dia-R1 | cdRNA05-postDia | 11.6982 | 251.258 | 4.42481  | 5.00E-05 | 0.0195319 |
| RNA-Seq | Trans-ABySS | XLOC_009750 | R1747725:0-1008 | cdRNA04-Dia-R3 | cdRNA05-postDia | 4.14159 | 251.258 | 5.92284  | 5.00E-05 | 0.0195319 |
| RNA-Seq | Trans-ABySS | XLOC_009750 | R1747725:0-1008 | cdRNA03-Dia-R2 | cdRNA05-postDia | 3.107   | 251.258 | 6.3375   | 5.00E-05 | 0.0195319 |
| RNA-Seq | Trans-ABySS | XLOC_009760 | R1747736:0-872  | cdRNA01-preDia | cdRNA02-Dia-R1  | 28.3353 | 169.259 | 2.57856  | 0.0002   | 0.0481888 |
| RNA-Seq | Trans-ABySS | XLOC_009760 | R1747736:0-872  | cdRNA01-preDia | cdRNA05-postDia | 28.3353 | 253.757 | 3.16278  | 5.00E-05 | 0.0195319 |
| RNA-Seq | Trans-ABySS | XLOC_009763 | R1747741:0-303  | cdRNA01-preDia | cdRNA02-Dia-R1  | 12.8982 | 94.9921 | 2.88064  | 0.0001   | 0.0354705 |
| RNA-Seq | Trans-ABySS | XLOC_009763 | R1747741:0-303  | cdRNA03-Dia-R2 | cdRNA05-postDia | 20.0097 | 182.032 | 3.18542  | 5.00E-05 | 0.0195319 |
| RNA-Seq | Trans-ABySS | XLOC_009763 | R1747741:0-303  | cdRNA04-Dia-R3 | cdRNA05-postDia | 18.7333 | 182.032 | 3.28051  | 5.00E-05 | 0.0195319 |
| RNA-Seq | Trans-ABySS | XLOC_009763 | R1747741:0-303  | cdRNA01-preDia | cdRNA05-postDia | 12.8982 | 182.032 | 3.81895  | 5.00E-05 | 0.0195319 |
| RNA-Seq | Trans-ABySS | XLOC_009766 | R1747745:0-3122 | cdRNA01-preDia | cdRNA05-postDia | 38.0138 | 358.672 | 3.23807  | 0.0002   | 0.0481888 |
| RNA-Seq | Trans-ABySS | XLOC_009766 | R1747745:0-3122 | cdRNA03-Dia-R2 | cdRNA05-postDia | 15.5624 | 358.672 | 4.52653  | 5.00E-05 | 0.0195319 |
| RNA-Seq | Trans-ABySS | XLOC_009766 | R1747745:0-3122 | cdRNA04-Dia-R3 | cdRNA05-postDia | 15.3178 | 358.672 | 4.54939  | 5.00E-05 | 0.0195319 |
| RNA-Seq | Trans-ABySS | XLOC_009773 | R1747756:0-148  | cdRNA04-Dia-R3 | cdRNA05-postDia | 430.653 | 2428.84 | 2.49567  | 0.0001   | 0.0354705 |
| RNA-Seq | Trans-ABySS | XLOC_009773 | R1747756:0-148  | cdRNA03-Dia-R2 | cdRNA05-postDia | 416.125 | 2428.84 | 2.54518  | 5.00E-05 | 0.0195319 |
| RNA-Seq | Trans-ABySS | XLOC_009923 | R1748043:0-658  | cdRNA01-preDia | cdRNA05-postDia | 67.7106 | 371.022 | 2.45405  | 5.00E-05 | 0.0195319 |
| RNA-Seq | Trans-ABySS | XLOC_009923 | R1748043:0-658  | cdRNA04-Dia-R3 | cdRNA05-postDia | 66.9495 | 371.022 | 2.47036  | 5.00E-05 | 0.0195319 |
| RNA-Seq | Trans-ABySS | XLOC_009923 | R1748043:0-658  | cdRNA03-Dia-R2 | cdRNA05-postDia | 61.6049 | 371.022 | 2.59039  | 5.00E-05 | 0.0195319 |
| RNA-Seq | Trans-ABySS | XLOC_009967 | R1748114:0-364  | cdRNA01-preDia | cdRNA05-postDia | 22.7384 | 134.289 | 2.56214  | 5.00E-05 | 0.0195319 |
| RNA-Seq | Trans-ABySS | XLOC_009969 | R1748117:0-1424 | cdRNA01-preDia | cdRNA05-postDia | 50.4327 | 4.83377 | -3.38314 | 5.00E-05 | 0.0195319 |
| RNA-Seq | Trans-ABySS | XLOC_009969 | R1748117:0-1424 | cdRNA01-preDia | cdRNA04-Dia-R3  | 50.4327 | 6.15863 | -3.03368 | 5.00E-05 | 0.0195319 |
| RNA-Seq | Trans-ABySS | XLOC_009969 | R1748117:0-1424 | cdRNA01-preDia | cdRNA03-Dia-R2  | 50.4327 | 6.58149 | -2.93787 | 5.00E-05 | 0.0195319 |
| RNA-Seq | Trans-ABySS | XLOC_010029 | R1748223:0-61   | cdRNA03-Dia-R2 | cdRNA05-postDia | 8156.57 | 81976.5 | 3.32918  | 0.0002   | 0.0481888 |
| RNA-Seq | Trans-ABySS | XLOC_010058 | R1748275:0-153  | cdRNA03-Dia-R2 | cdRNA05-postDia | 200.135 | 1439.09 | 2.84611  | 0.0002   | 0.0481888 |
| RNA-Seq | Trans-ABySS | XLOC_010058 | R1748275:0-153  | cdRNA04-Dia-R3 | cdRNA05-postDia | 187.458 | 1439.09 | 2.94052  | 0.0002   | 0.0481888 |
| RNA-Seq | Trans-ABySS | XLOC_010058 | R1748275:0-153  | cdRNA02-Dia-R1 | cdRNA05-postDia | 169.945 | 1439.09 | 3.08202  | 5.00E-05 | 0.0195319 |
| RNA-Seq | Trans-ABySS | XLOC_010058 | R1748275:0-153  | cdRNA01-preDia | cdRNA05-postDia | 130.616 | 1439.09 | 3.46175  | 5.00E-05 | 0.0195319 |
| RNA-Seq | Trans-ABySS | XLOC_010105 | R1748351:1-96   | cdRNA02-Dia-R1 | cdRNA05-postDia | 722.273 | 9933.87 | 3.78174  | 5.00E-05 | 0.0195319 |
| RNA-Seq | Trans-ABySS | XLOC_010105 | R1748351:1-96   | cdRNA01-preDia | cdRNA05-postDia | 506.176 | 9933.87 | 4.29464  | 5.00E-05 | 0.0195319 |
| RNA-Seq | Trans-ABySS | XLOC_010145 | R1748439:1-154  | cdRNA03-Dia-R2 | cdRNA05-postDia | 1013.45 | 131.211 | -2.94932 | 0.00015  | 0.0374403 |
| RNA-Seq | Trans-ABySS | XLOC_010145 | R1748439:1-154  | cdRNA02-Dia-R1 | cdRNA05-postDia | 830.486 | 131.211 | -2.66207 | 0.00015  | 0.0374403 |
| RNA-Seq | Trans-ABySS | XLOC_010147 | R1748442:0-373  | cdRNA01-preDia | cdRNA05-postDia | 17.7783 | 94.7958 | 2.41471  | 0.00015  | 0.0374403 |
| RNA-Seq | Trans-ABySS | XLOC_010163 | R1748473:0-108  | cdRNA01-preDia | cdRNA05-postDia | 320.797 | 10204.9 | 4.99145  | 5.00E-05 | 0.0195319 |
| RNA-Seq | Trans-ABySS | XLOC_010202 | R1748528:2-638  | cdRNA01-preDia | cdRNA03-Dia-R2  | 3.53203 | 28.3191 | 3.0032   | 5.00E-05 | 0.0195319 |
| RNA-Seq | Trans-ABySS | XLOC_010202 | R1748528:2-638  | cdRNA01-preDia | cdRNA04-Dia-R3  | 3.53203 | 31.5194 | 3.15767  | 5.00E-05 | 0.0195319 |
| RNA-Seq | Trans-ABySS | XLOC_010256 | R1748646:0-1040 | cdRNA04-Dia-R3 | cdRNA05-postDia | 142.931 | 17.9268 | -2.99513 | 5.00E-05 | 0.0195319 |
| RNA-Seq | Trans-ABySS | XLOC_010256 | R1748646:0-1040 | cdRNA03-Dia-R2 | cdRNA05-postDia | 132.702 | 17.9268 | -2.88801 | 5.00E-05 | 0.0195319 |
| RNA-Seq | Trans-ABySS | XLOC_010274 | R1748683:0-1527 | cdRNA01-preDia | cdRNA03-Dia-R2  | 11.2732 | 86.5859 | 2.94123  | 0.00015  | 0.0374403 |
| RNA-Seq | Trans-ABySS | XLOC_010274 | R1748683:0-1527 | cdRNA01-preDia | cdRNA04-Dia-R3  | 11.2732 | 84.7034 | 2.90952  | 5.00E-05 | 0.0195319 |
| RNA-Seq | Trans-ABySS | XLOC_010300 | R1748733:0-1292 | cdRNA04-Dia-R3 | cdRNA05-postDia | 60.8967 | 9.25105 | -2.71867 | 5.00E-05 | 0.0195319 |

|         |             |             |                 |                |                 |         |         |          |          |           |
|---------|-------------|-------------|-----------------|----------------|-----------------|---------|---------|----------|----------|-----------|
| RNA-Seq | Trans-ABySS | XLOC_010300 | R1748733:0-1292 | cdRNA03-Dia-R2 | cdRNA05-postDia | 58.6708 | 9.25105 | -2.66495 | 5.00E-05 | 0.0195319 |
| RNA-Seq | Trans-ABySS | XLOC_010323 | R1748780:0-511  | cdRNA01-preDia | cdRNA03-Dia-R2  | 20.5016 | 100.837 | 2.29822  | 0.0002   | 0.0481888 |
| RNA-Seq | Trans-ABySS | XLOC_010349 | R1748833:0-387  | cdRNA02-Dia-R1 | cdRNA05-postDia | 10.0862 | 174.775 | 4.11504  | 5.00E-05 | 0.0195319 |
| RNA-Seq | Trans-ABySS | XLOC_010349 | R1748833:0-387  | cdRNA04-Dia-R3 | cdRNA05-postDia | 3.96212 | 174.775 | 5.46308  | 5.00E-05 | 0.0195319 |
| RNA-Seq | Trans-ABySS | XLOC_010397 | R1748920:0-480  | cdRNA02-Dia-R1 | cdRNA05-postDia | 20.0806 | 103.295 | 2.3629   | 0.00015  | 0.0374403 |
| RNA-Seq | Trans-ABySS | XLOC_010397 | R1748920:0-480  | cdRNA04-Dia-R3 | cdRNA05-postDia | 19.0244 | 103.295 | 2.44085  | 5.00E-05 | 0.0195319 |
| RNA-Seq | Trans-ABySS | XLOC_010433 | R1748984:1-1808 | cdRNA01-preDia | cdRNA04-Dia-R3  | 7.90993 | 55.7135 | 2.81629  | 5.00E-05 | 0.0195319 |
| RNA-Seq | Trans-ABySS | XLOC_010433 | R1748984:1-1808 | cdRNA01-preDia | cdRNA03-Dia-R2  | 7.90993 | 56.9079 | 2.84689  | 5.00E-05 | 0.0195319 |
| RNA-Seq | Trans-ABySS | XLOC_010453 | R1749018:0-237  | cdRNA02-Dia-R1 | cdRNA05-postDia | 27.0579 | 437.529 | 4.01525  | 5.00E-05 | 0.0195319 |
| RNA-Seq | Trans-ABySS | XLOC_010453 | R1749018:0-237  | cdRNA04-Dia-R3 | cdRNA05-postDia | 13.7552 | 437.529 | 4.99133  | 0.0002   | 0.0481888 |
| RNA-Seq | Trans-ABySS | XLOC_010479 | R1749063:3-262  | cdRNA03-Dia-R2 | cdRNA05-postDia | 11.569  | 221.195 | 4.25699  | 0.0001   | 0.0354705 |
| RNA-Seq | Trans-ABySS | XLOC_010490 | R1749077:0-2050 | cdRNA01-preDia | cdRNA04-Dia-R3  | 9.36417 | 63.3884 | 2.759    | 0.00015  | 0.0374403 |
| RNA-Seq | Trans-ABySS | XLOC_010490 | R1749077:0-2050 | cdRNA01-preDia | cdRNA03-Dia-R2  | 9.36417 | 64.6164 | 2.78668  | 0.0002   | 0.0481888 |
| RNA-Seq | Trans-ABySS | XLOC_010501 | R1749094:0-2359 | cdRNA03-Dia-R2 | cdRNA05-postDia | 17.5741 | 121.292 | 2.78696  | 0.0002   | 0.0481888 |
| RNA-Seq | Trans-ABySS | XLOC_010501 | R1749094:0-2359 | cdRNA04-Dia-R3 | cdRNA05-postDia | 17.2149 | 121.292 | 2.81675  | 0.00015  | 0.0374403 |
| RNA-Seq | Trans-ABySS | XLOC_010554 | R1749191:0-1661 | cdRNA01-preDia | cdRNA05-postDia | 8.3895  | 43.64   | 2.37899  | 5.00E-05 | 0.0195319 |
| RNA-Seq | Trans-ABySS | XLOC_010554 | R1749191:0-1661 | cdRNA01-preDia | cdRNA04-Dia-R3  | 8.3895  | 73.075  | 3.12272  | 5.00E-05 | 0.0195319 |
| RNA-Seq | Trans-ABySS | XLOC_010554 | R1749191:0-1661 | cdRNA01-preDia | cdRNA03-Dia-R2  | 8.3895  | 73.8465 | 3.13787  | 5.00E-05 | 0.0195319 |
| RNA-Seq | Trans-ABySS | XLOC_010607 | R1749305:0-1394 | cdRNA04-Dia-R3 | cdRNA05-postDia | 29.7398 | 156.978 | 2.40009  | 0.0002   | 0.0481888 |
| RNA-Seq | Trans-ABySS | XLOC_010607 | R1749305:0-1394 | cdRNA03-Dia-R2 | cdRNA05-postDia | 28.2267 | 156.978 | 2.47543  | 0.0001   | 0.0354705 |
| RNA-Seq | Trans-ABySS | XLOC_010607 | R1749305:0-1394 | cdRNA02-Dia-R1 | cdRNA05-postDia | 25.4329 | 156.978 | 2.62579  | 5.00E-05 | 0.0195319 |
| RNA-Seq | Trans-ABySS | XLOC_010631 | R1749349:0-596  | cdRNA02-Dia-R1 | cdRNA05-postDia | 20.9937 | 137.88  | 2.71539  | 5.00E-05 | 0.0195319 |
| RNA-Seq | Trans-ABySS | XLOC_010631 | R1749349:0-596  | cdRNA03-Dia-R2 | cdRNA05-postDia | 4.43793 | 137.88  | 4.95739  | 5.00E-05 | 0.0195319 |
| RNA-Seq | Trans-ABySS | XLOC_010631 | R1749349:0-596  | cdRNA01-preDia | cdRNA05-postDia | 3.83953 | 137.88  | 5.16634  | 5.00E-05 | 0.0195319 |
| RNA-Seq | Trans-ABySS | XLOC_010631 | R1749349:0-596  | cdRNA04-Dia-R3 | cdRNA05-postDia | 3.37596 | 137.88  | 5.35198  | 5.00E-05 | 0.0195319 |
| RNA-Seq | Trans-ABySS | XLOC_010642 | R1749366:0-1718 | cdRNA02-Dia-R1 | cdRNA05-postDia | 18.5703 | 195.84  | 3.3986   | 5.00E-05 | 0.0195319 |
| RNA-Seq | Trans-ABySS | XLOC_010642 | R1749366:0-1718 | cdRNA01-preDia | cdRNA05-postDia | 8.43516 | 195.84  | 4.53711  | 5.00E-05 | 0.0195319 |
| RNA-Seq | Trans-ABySS | XLOC_010642 | R1749366:0-1718 | cdRNA04-Dia-R3 | cdRNA05-postDia | 7.50046 | 195.84  | 4.70655  | 5.00E-05 | 0.0195319 |
| RNA-Seq | Trans-ABySS | XLOC_010642 | R1749366:0-1718 | cdRNA03-Dia-R2 | cdRNA05-postDia | 7.39538 | 195.84  | 4.72691  | 5.00E-05 | 0.0195319 |
| RNA-Seq | Trans-ABySS | XLOC_010685 | R1749432:6-1721 | cdRNA01-preDia | cdRNA05-postDia | 52.6735 | 9.80116 | -2.42605 | 0.00015  | 0.0374403 |
| RNA-Seq | Trans-ABySS | XLOC_010685 | R1749432:6-1721 | cdRNA03-Dia-R2 | cdRNA05-postDia | 52.6085 | 9.80116 | -2.42427 | 0.0001   | 0.0354705 |
| RNA-Seq | Trans-ABySS | XLOC_010695 | R1749455:0-1247 | cdRNA01-preDia | cdRNA03-Dia-R2  | 12.7253 | 80.9185 | 2.66877  | 0.0001   | 0.0354705 |
| RNA-Seq | Trans-ABySS | XLOC_010695 | R1749455:0-1247 | cdRNA01-preDia | cdRNA04-Dia-R3  | 12.7253 | 85.0534 | 2.74067  | 5.00E-05 | 0.0195319 |
| RNA-Seq | Trans-ABySS | XLOC_010802 | R1749653:0-972  | cdRNA04-Dia-R3 | cdRNA05-postDia | 5.72538 | 28.5783 | 2.31947  | 0.00015  | 0.0374403 |
| RNA-Seq | Trans-ABySS | XLOC_010802 | R1749653:0-972  | cdRNA03-Dia-R2 | cdRNA05-postDia | 5.4017  | 28.5783 | 2.40343  | 0.00015  | 0.0374403 |
| RNA-Seq | Trans-ABySS | XLOC_010828 | R1749717:1-344  | cdRNA04-Dia-R3 | cdRNA05-postDia | 22.5608 | 120.012 | 2.41129  | 0.0002   | 0.0481888 |
| RNA-Seq | Trans-ABySS | XLOC_010835 | R1749726:1-1091 | cdRNA02-Dia-R1 | cdRNA05-postDia | 24.0745 | 195.325 | 3.0203   | 5.00E-05 | 0.0195319 |
| RNA-Seq | Trans-ABySS | XLOC_010835 | R1749726:1-1091 | cdRNA03-Dia-R2 | cdRNA05-postDia | 10.5729 | 195.325 | 4.20743  | 5.00E-05 | 0.0195319 |
| RNA-Seq | Trans-ABySS | XLOC_010835 | R1749726:1-1091 | cdRNA01-preDia | cdRNA05-postDia | 10.0898 | 195.325 | 4.27491  | 5.00E-05 | 0.0195319 |
| RNA-Seq | Trans-ABySS | XLOC_010835 | R1749726:1-1091 | cdRNA04-Dia-R3 | cdRNA05-postDia | 9.82937 | 195.325 | 4.31263  | 5.00E-05 | 0.0195319 |
| RNA-Seq | Trans-ABySS | XLOC_010843 | R1749742:0-755  | cdRNA01-preDia | cdRNA05-postDia | 58.4397 | 326.228 | 2.48086  | 0.00015  | 0.0374403 |
| RNA-Seq | Trans-ABySS | XLOC_010843 | R1749742:0-755  | cdRNA04-Dia-R3 | cdRNA05-postDia | 28.2792 | 326.228 | 3.52807  | 5.00E-05 | 0.0195319 |
| RNA-Seq | Trans-ABySS | XLOC_010843 | R1749742:0-755  | cdRNA03-Dia-R2 | cdRNA05-postDia | 28.0111 | 326.228 | 3.54181  | 5.00E-05 | 0.0195319 |
| RNA-Seq | Trans-ABySS | XLOC_010843 | R1749742:0-755  | cdRNA02-Dia-R1 | cdRNA05-postDia | 24.0801 | 326.228 | 3.75997  | 5.00E-05 | 0.0195319 |
| RNA-Seq | Trans-ABySS | XLOC_010861 | R1749773:2-618  | cdRNA01-preDia | cdRNA03-Dia-R2  | 165.056 | 30.0989 | -2.45518 | 0.0002   | 0.0481888 |
| RNA-Seq | Trans-ABySS | XLOC_010867 | R1749785:3-190  | cdRNA02-Dia-R1 | cdRNA05-postDia | 108.013 | 1572.38 | 3.86367  | 5.00E-05 | 0.0195319 |
| RNA-Seq | Trans-ABySS | XLOC_010889 | R1749827:0-114  | cdRNA02-Dia-R1 | cdRNA05-postDia | 594.002 | 4690.76 | 2.98128  | 5.00E-05 | 0.0195319 |

|         |             |             |                 |                |                 |         |         |          |          |           |
|---------|-------------|-------------|-----------------|----------------|-----------------|---------|---------|----------|----------|-----------|
| RNA-Seq | Trans-ABySS | XLOC_010889 | R1749827:0-114  | cdRNA04-Dia-R3 | cdRNA05-postDia | 503.28  | 4690.76 | 3.22039  | 5.00E-05 | 0.0195319 |
| RNA-Seq | Trans-ABySS | XLOC_010889 | R1749827:0-114  | cdRNA03-Dia-R2 | cdRNA05-postDia | 429.011 | 4690.76 | 3.45074  | 5.00E-05 | 0.0195319 |
| RNA-Seq | Trans-ABySS | XLOC_010924 | R1749888:0-551  | cdRNA02-Dia-R1 | cdRNA05-postDia | 13.7457 | 195.627 | 3.83106  | 5.00E-05 | 0.0195319 |
| RNA-Seq | Trans-ABySS | XLOC_010924 | R1749888:0-551  | cdRNA01-preDia | cdRNA05-postDia | 4.206   | 195.627 | 5.53951  | 5.00E-05 | 0.0195319 |
| RNA-Seq | Trans-ABySS | XLOC_010924 | R1749888:0-551  | cdRNA04-Dia-R3 | cdRNA05-postDia | 3.19863 | 195.627 | 5.93451  | 5.00E-05 | 0.0195319 |
| RNA-Seq | Trans-ABySS | XLOC_010924 | R1749888:0-551  | cdRNA03-Dia-R2 | cdRNA05-postDia | 2.82809 | 195.627 | 6.11213  | 5.00E-05 | 0.0195319 |
| RNA-Seq | Trans-ABySS | XLOC_010975 | R1749982:2-541  | cdRNA02-Dia-R1 | cdRNA04-Dia-R3  | 5.9158  | 34.1514 | 2.5293   | 0.0002   | 0.0481888 |
| RNA-Seq | Trans-ABySS | XLOC_010975 | R1749982:2-541  | cdRNA02-Dia-R1 | cdRNA03-Dia-R2  | 5.9158  | 38.3484 | 2.69652  | 0.00015  | 0.0374403 |
| RNA-Seq | Trans-ABySS | XLOC_010975 | R1749982:2-541  | cdRNA01-preDia | cdRNA04-Dia-R3  | 3.81207 | 34.1514 | 3.1633   | 5.00E-05 | 0.0195319 |
| RNA-Seq | Trans-ABySS | XLOC_010975 | R1749982:2-541  | cdRNA01-preDia | cdRNA03-Dia-R2  | 3.81207 | 38.3484 | 3.33052  | 5.00E-05 | 0.0195319 |
| RNA-Seq | Trans-ABySS | XLOC_010990 | R1750012:0-449  | cdRNA03-Dia-R2 | cdRNA05-postDia | 46.4267 | 9.22954 | -2.33062 | 0.0002   | 0.0481888 |
| RNA-Seq | Trans-ABySS | XLOC_011003 | R1750036:2-508  | cdRNA01-preDia | cdRNA05-postDia | 6.947   | 67.3886 | 3.27804  | 5.00E-05 | 0.0195319 |
| RNA-Seq | Trans-ABySS | XLOC_011030 | R1750096:1-221  | cdRNA02-Dia-R1 | cdRNA05-postDia | 81.2154 | 534.884 | 2.7194   | 5.00E-05 | 0.0195319 |
| RNA-Seq | Trans-ABySS | XLOC_011030 | R1750096:1-221  | cdRNA01-preDia | cdRNA05-postDia | 34.0212 | 534.884 | 3.97472  | 5.00E-05 | 0.0195319 |
| RNA-Seq | Trans-ABySS | XLOC_011030 | R1750096:1-221  | cdRNA03-Dia-R2 | cdRNA05-postDia | 29.8316 | 534.884 | 4.16431  | 5.00E-05 | 0.0195319 |
| RNA-Seq | Trans-ABySS | XLOC_011030 | R1750096:1-221  | cdRNA04-Dia-R3 | cdRNA05-postDia | 23.0591 | 534.884 | 4.53582  | 5.00E-05 | 0.0195319 |
| RNA-Seq | Trans-ABySS | XLOC_011060 | R1750156:0-425  | cdRNA02-Dia-R2 | cdRNA05-postDia | 146.326 | 13.2407 | -3.46614 | 5.00E-05 | 0.0195319 |
| RNA-Seq | Trans-ABySS | XLOC_011060 | R1750156:0-425  | cdRNA04-Dia-R3 | cdRNA05-postDia | 134.628 | 13.2407 | -3.34593 | 5.00E-05 | 0.0195319 |
| RNA-Seq | Trans-ABySS | XLOC_011060 | R1750156:0-425  | cdRNA02-Dia-R1 | cdRNA04-Dia-R3  | 23.2532 | 134.628 | 2.53348  | 5.00E-05 | 0.0195319 |
| RNA-Seq | Trans-ABySS | XLOC_011060 | R1750156:0-425  | cdRNA02-Dia-R1 | cdRNA03-Dia-R2  | 23.2532 | 146.326 | 2.65369  | 5.00E-05 | 0.0195319 |
| RNA-Seq | Trans-ABySS | XLOC_011060 | R1750156:0-425  | cdRNA01-preDia | cdRNA04-Dia-R3  | 11.7627 | 134.628 | 3.51669  | 5.00E-05 | 0.0195319 |
| RNA-Seq | Trans-ABySS | XLOC_011060 | R1750156:0-425  | cdRNA01-preDia | cdRNA03-Dia-R2  | 11.7627 | 146.326 | 3.6369   | 5.00E-05 | 0.0195319 |
| RNA-Seq | Trans-ABySS | XLOC_011063 | R1750159:0-103  | cdRNA02-Dia-R1 | cdRNA05-postDia | 920.47  | 6288.29 | 2.77223  | 5.00E-05 | 0.0195319 |
| RNA-Seq | Trans-ABySS | XLOC_011063 | R1750159:0-103  | cdRNA03-Dia-R2 | cdRNA05-postDia | 557.572 | 6288.29 | 3.49544  | 5.00E-05 | 0.0195319 |
| RNA-Seq | Trans-ABySS | XLOC_011063 | R1750159:0-103  | cdRNA04-Dia-R3 | cdRNA05-postDia | 513.083 | 6288.29 | 3.6154   | 0.0002   | 0.0481888 |
| RNA-Seq | Trans-ABySS | XLOC_011127 | R1750281:0-1820 | cdRNA01-preDia | cdRNA05-postDia | 7.47938 | 47.8246 | 2.67676  | 5.00E-05 | 0.0195319 |
| RNA-Seq | Trans-ABySS | XLOC_011164 | R1750338:0-1534 | cdRNA02-Dia-R1 | cdRNA05-postDia | 28.8678 | 182.96  | 2.664    | 0.00015  | 0.0374403 |
| RNA-Seq | Trans-ABySS | XLOC_011164 | R1750338:0-1534 | cdRNA03-Dia-R2 | cdRNA05-postDia | 22.0692 | 182.96  | 3.05143  | 5.00E-05 | 0.0195319 |
| RNA-Seq | Trans-ABySS | XLOC_011164 | R1750338:0-1534 | cdRNA04-Dia-R3 | cdRNA05-postDia | 20.7675 | 182.96  | 3.13913  | 5.00E-05 | 0.0195319 |
| RNA-Seq | Trans-ABySS | XLOC_011168 | R1750344:0-388  | cdRNA01-preDia | cdRNA02-Dia-R1  | 134.482 | 23.1646 | -2.53741 | 0.00015  | 0.0374403 |
| RNA-Seq | Trans-ABySS | XLOC_011183 | R1750373:0-360  | cdRNA04-Dia-R3 | cdRNA05-postDia | 29.4513 | 152.946 | 2.37662  | 5.00E-05 | 0.0195319 |
| RNA-Seq | Trans-ABySS | XLOC_011183 | R1750373:0-360  | cdRNA03-Dia-R2 | cdRNA05-postDia | 29.3494 | 152.946 | 2.38162  | 0.0002   | 0.0481888 |
| RNA-Seq | Trans-ABySS | XLOC_011183 | R1750373:0-360  | cdRNA02-Dia-R1 | cdRNA05-postDia | 22.1007 | 152.946 | 2.79086  | 5.00E-05 | 0.0195319 |
| RNA-Seq | Trans-ABySS | XLOC_011294 | R1750578:0-2213 | cdRNA04-Dia-R3 | cdRNA05-postDia | 10.7524 | 54.1394 | 2.33203  | 0.00015  | 0.0374403 |
| RNA-Seq | Trans-ABySS | XLOC_011294 | R1750578:0-2213 | cdRNA01-preDia | cdRNA05-postDia | 10.3298 | 54.1394 | 2.38986  | 0.00015  | 0.0374403 |
| RNA-Seq | Trans-ABySS | XLOC_011323 | R1750629:9-572  | cdRNA02-Dia-R1 | cdRNA03-Dia-R2  | 35.9289 | 5.71563 | -2.65216 | 5.00E-05 | 0.0195319 |
| RNA-Seq | Trans-ABySS | XLOC_011323 | R1750629:9-572  | cdRNA03-Dia-R2 | cdRNA05-postDia | 5.71563 | 33.2232 | 2.53921  | 0.0002   | 0.0481888 |
| RNA-Seq | Trans-ABySS | XLOC_011323 | R1750629:9-572  | cdRNA04-Dia-R3 | cdRNA05-postDia | 2.9728  | 33.2232 | 3.4823   | 0.0002   | 0.0481888 |
| RNA-Seq | Trans-ABySS | XLOC_011329 | R1750636:0-1333 | cdRNA01-preDia | cdRNA05-postDia | 3.35308 | 16.8484 | 2.32905  | 5.00E-05 | 0.0195319 |
| RNA-Seq | Trans-ABySS | XLOC_011362 | R1750691:0-654  | cdRNA02-Dia-R1 | cdRNA05-postDia | 18.064  | 131.638 | 2.86539  | 5.00E-05 | 0.0195319 |
| RNA-Seq | Trans-ABySS | XLOC_011362 | R1750691:0-654  | cdRNA01-preDia | cdRNA05-postDia | 6.48664 | 131.638 | 4.34296  | 5.00E-05 | 0.0195319 |
| RNA-Seq | Trans-ABySS | XLOC_011362 | R1750691:0-654  | cdRNA03-Dia-R2 | cdRNA05-postDia | 5.5511  | 131.638 | 4.56766  | 5.00E-05 | 0.0195319 |
| RNA-Seq | Trans-ABySS | XLOC_011362 | R1750691:0-654  | cdRNA04-Dia-R3 | cdRNA05-postDia | 3.51004 | 131.638 | 5.22894  | 5.00E-05 | 0.0195319 |
| RNA-Seq | Trans-ABySS | XLOC_011376 | R1750726:0-516  | cdRNA04-Dia-R3 | cdRNA05-postDia | 7.51575 | 40.4997 | 2.42992  | 0.0002   | 0.0481888 |
| RNA-Seq | Trans-ABySS | XLOC_011376 | R1750726:0-516  | cdRNA01-preDia | cdRNA05-postDia | 7.35713 | 40.4997 | 2.4607   | 0.0002   | 0.0481888 |
| RNA-Seq | Trans-ABySS | XLOC_011388 | R1750745:0-494  | cdRNA01-preDia | cdRNA04-Dia-R3  | 25.7924 | 136.752 | 2.40655  | 0.0002   | 0.0481888 |
| RNA-Seq | Trans-ABySS | XLOC_011388 | R1750745:0-494  | cdRNA01-preDia | cdRNA03-Dia-R2  | 25.7924 | 140.587 | 2.44645  | 0.0001   | 0.0354705 |

|         |             |             |                 |                |                 |         |         |          |          |           |
|---------|-------------|-------------|-----------------|----------------|-----------------|---------|---------|----------|----------|-----------|
| RNA-Seq | Trans-ABySS | XLOC_011402 | R1750775:1-501  | cdRNA02-Dia-R1 | cdRNA05-postDia | 8.17043 | 48.982  | 2.58377  | 5.00E-05 | 0.0195319 |
| RNA-Seq | Trans-ABySS | XLOC_011402 | R1750775:1-501  | cdRNA03-Dia-R2 | cdRNA05-postDia | 7.68556 | 48.982  | 2.67203  | 0.0001   | 0.0354705 |
| RNA-Seq | Trans-ABySS | XLOC_011402 | R1750775:1-501  | cdRNA01-preDia | cdRNA05-postDia | 2.31124 | 48.982  | 4.40551  | 0.0001   | 0.0354705 |
| RNA-Seq | Trans-ABySS | XLOC_011422 | R1750820:0-1422 | cdRNA03-Dia-R2 | cdRNA05-postDia | 129.246 | 14.962  | -3.11074 | 5.00E-05 | 0.0195319 |
| RNA-Seq | Trans-ABySS | XLOC_011422 | R1750820:0-1422 | cdRNA04-Dia-R3 | cdRNA05-postDia | 124.812 | 14.962  | -3.06038 | 5.00E-05 | 0.0195319 |
| RNA-Seq | Trans-ABySS | XLOC_011422 | R1750820:0-1422 | cdRNA02-Dia-R1 | cdRNA03-Dia-R2  | 20.7391 | 129.246 | 2.63969  | 0.00015  | 0.0374403 |
| RNA-Seq | Trans-ABySS | XLOC_011422 | R1750820:0-1422 | cdRNA01-preDia | cdRNA04-Dia-R3  | 10.2229 | 124.812 | 3.60987  | 5.00E-05 | 0.0195319 |
| RNA-Seq | Trans-ABySS | XLOC_011422 | R1750820:0-1422 | cdRNA01-preDia | cdRNA03-Dia-R2  | 10.2229 | 129.246 | 3.66023  | 5.00E-05 | 0.0195319 |
| RNA-Seq | Trans-ABySS | XLOC_011454 | R1750880:0-1607 | cdRNA01-preDia | cdRNA05-postDia | 8.54986 | 84.5398 | 3.30566  | 5.00E-05 | 0.0195319 |
| RNA-Seq | Trans-ABySS | XLOC_011548 | R1751061:0-717  | cdRNA01-preDia | cdRNA05-postDia | 7.11257 | 41.1413 | 2.53214  | 0.0001   | 0.0354705 |
| RNA-Seq | Trans-ABySS | XLOC_011703 | R1751348:0-824  | cdRNA01-preDia | cdRNA05-postDia | 14.8599 | 88.8219 | 2.57949  | 5.00E-05 | 0.0195319 |
| RNA-Seq | Trans-ABySS | XLOC_011827 | R1751594:0-408  | cdRNA03-Dia-R2 | cdRNA05-postDia | 132.477 | 21.9469 | -2.59366 | 5.00E-05 | 0.0195319 |
| RNA-Seq | Trans-ABySS | XLOC_011827 | R1751594:0-408  | cdRNA04-Dia-R3 | cdRNA05-postDia | 128.038 | 21.9469 | -2.54449 | 5.00E-05 | 0.0195319 |
| RNA-Seq | Trans-ABySS | XLOC_011827 | R1751594:0-408  | cdRNA01-preDia | cdRNA03-Dia-R2  | 26.3754 | 132.477 | 2.32848  | 0.0002   | 0.0481888 |
| RNA-Seq | Trans-ABySS | XLOC_011837 | R1751609:0-525  | cdRNA04-Dia-R3 | cdRNA05-postDia | 23.9379 | 162.022 | 2.75882  | 5.00E-05 | 0.0195319 |
| RNA-Seq | Trans-ABySS | XLOC_011837 | R1751609:0-525  | cdRNA03-Dia-R2 | cdRNA05-postDia | 21.539  | 162.022 | 2.91117  | 5.00E-05 | 0.0195319 |
| RNA-Seq | Trans-ABySS | XLOC_011912 | R1751756:0-1038 | cdRNA02-Dia-R1 | cdRNA05-postDia | 14.7566 | 116.309 | 2.97853  | 5.00E-05 | 0.0195319 |
| RNA-Seq | Trans-ABySS | XLOC_011912 | R1751756:0-1038 | cdRNA04-Dia-R3 | cdRNA05-postDia | 13.9235 | 116.309 | 3.06237  | 5.00E-05 | 0.0195319 |
| RNA-Seq | Trans-ABySS | XLOC_011912 | R1751756:0-1038 | cdRNA03-Dia-R2 | cdRNA05-postDia | 12.5416 | 116.309 | 3.21317  | 5.00E-05 | 0.0195319 |
| RNA-Seq | Trans-ABySS | XLOC_011912 | R1751756:0-1038 | cdRNA01-preDia | cdRNA05-postDia | 4.50355 | 116.309 | 4.69076  | 5.00E-05 | 0.0195319 |
| RNA-Seq | Trans-ABySS | XLOC_011942 | R1751811:2-320  | cdRNA03-Dia-R2 | cdRNA05-postDia | 33.7529 | 199.394 | 2.56254  | 0.0001   | 0.0354705 |
| RNA-Seq | Trans-ABySS | XLOC_011955 | R1751833:0-737  | cdRNA01-preDia | cdRNA03-Dia-R2  | 15.8307 | 87.1223 | 2.46032  | 5.00E-05 | 0.0195319 |
| RNA-Seq | Trans-ABySS | XLOC_011955 | R1751833:0-737  | cdRNA01-preDia | cdRNA04-Dia-R3  | 15.8307 | 88.6637 | 2.48562  | 5.00E-05 | 0.0195319 |
| RNA-Seq | Trans-ABySS | XLOC_011978 | R1751874:0-550  | cdRNA01-preDia | cdRNA03-Dia-R2  | 18.9817 | 96.9487 | 2.35261  | 0.0001   | 0.0354705 |
| RNA-Seq | Trans-ABySS | XLOC_011987 | R1751888:0-2523 | cdRNA01-preDia | cdRNA04-Dia-R3  | 6.94361 | 40.4126 | 2.54105  | 0.0002   | 0.0481888 |
| RNA-Seq | Trans-ABySS | XLOC_011987 | R1751888:0-2523 | cdRNA01-preDia | cdRNA03-Dia-R2  | 6.94361 | 42.2688 | 2.60583  | 5.00E-05 | 0.0195319 |
| RNA-Seq | Trans-ABySS | XLOC_012067 | R1752054:0-1677 | cdRNA01-preDia | cdRNA03-Dia-R2  | 87.0091 | 13.9608 | -2.63978 | 0.0002   | 0.0481888 |
| RNA-Seq | Trans-ABySS | XLOC_012373 | R1752607:0-452  | cdRNA02-Dia-R1 | cdRNA05-postDia | 17.2009 | 145.171 | 3.0772   | 5.00E-05 | 0.0195319 |
| RNA-Seq | Trans-ABySS | XLOC_012373 | R1752607:0-452  | cdRNA03-Dia-R2 | cdRNA05-postDia | 10.4321 | 145.171 | 3.79866  | 5.00E-05 | 0.0195319 |
| RNA-Seq | Trans-ABySS | XLOC_012373 | R1752607:0-452  | cdRNA04-Dia-R3 | cdRNA05-postDia | 9.46726 | 145.171 | 3.93867  | 5.00E-05 | 0.0195319 |
| RNA-Seq | Trans-ABySS | XLOC_012373 | R1752607:0-452  | cdRNA01-preDia | cdRNA05-postDia | 6.43663 | 145.171 | 4.49531  | 5.00E-05 | 0.0195319 |
| RNA-Seq | Trans-ABySS | XLOC_012461 | R1752793:3-317  | cdRNA01-preDia | cdRNA05-postDia | 21.875  | 122.475 | 2.48514  | 0.0002   | 0.0481888 |
| RNA-Seq | Trans-ABySS | XLOC_012461 | R1752793:3-317  | cdRNA04-Dia-R3 | cdRNA05-postDia | 20.0956 | 122.475 | 2.60754  | 5.00E-05 | 0.0195319 |
| RNA-Seq | Trans-ABySS | XLOC_012461 | R1752793:3-317  | cdRNA02-Dia-R1 | cdRNA05-postDia | 18.1988 | 122.475 | 2.75058  | 0.00015  | 0.0374403 |
| RNA-Seq | Trans-ABySS | XLOC_012461 | R1752793:3-317  | cdRNA03-Dia-R2 | cdRNA05-postDia | 17.8286 | 122.475 | 2.78022  | 5.00E-05 | 0.0195319 |
| RNA-Seq | Trans-ABySS | XLOC_012498 | R1752861:0-834  | cdRNA01-preDia | cdRNA03-Dia-R2  | 9.70108 | 50.1303 | 2.36946  | 0.00015  | 0.0374403 |
| RNA-Seq | Trans-ABySS | XLOC_012498 | R1752861:0-834  | cdRNA01-preDia | cdRNA04-Dia-R3  | 9.70108 | 54.0063 | 2.47691  | 0.0001   | 0.0354705 |
| RNA-Seq | Trans-ABySS | XLOC_012533 | R1752917:1-687  | cdRNA03-Dia-R2 | cdRNA05-postDia | 12.2161 | 82.239  | 2.75104  | 5.00E-05 | 0.0195319 |
| RNA-Seq | Trans-ABySS | XLOC_012533 | R1752917:1-687  | cdRNA02-Dia-R1 | cdRNA05-postDia | 11.6381 | 82.239  | 2.82097  | 5.00E-05 | 0.0195319 |
| RNA-Seq | Trans-ABySS | XLOC_012533 | R1752917:1-687  | cdRNA04-Dia-R3 | cdRNA05-postDia | 11.5138 | 82.239  | 2.83645  | 5.00E-05 | 0.0195319 |
| RNA-Seq | Trans-ABySS | XLOC_012533 | R1752917:1-687  | cdRNA01-preDia | cdRNA05-postDia | 9.27326 | 82.239  | 3.14868  | 5.00E-05 | 0.0195319 |
| RNA-Seq | Trans-ABySS | XLOC_012573 | R1752985:0-2502 | cdRNA01-preDia | cdRNA02-Dia-R1  | 2.34204 | 13.638  | 2.5418   | 5.00E-05 | 0.0195319 |
| RNA-Seq | Trans-ABySS | XLOC_012573 | R1752985:0-2502 | cdRNA01-preDia | cdRNA05-postDia | 2.34204 | 23.6944 | 3.33871  | 5.00E-05 | 0.0195319 |
| RNA-Seq | Trans-ABySS | XLOC_012576 | R1752992:0-484  | cdRNA01-preDia | cdRNA03-Dia-R2  | 4.72373 | 34.092  | 2.85143  | 5.00E-05 | 0.0195319 |
| RNA-Seq | Trans-ABySS | XLOC_012576 | R1752992:0-484  | cdRNA01-preDia | cdRNA04-Dia-R3  | 4.72373 | 36.743  | 2.95947  | 5.00E-05 | 0.0195319 |
| RNA-Seq | Trans-ABySS | XLOC_012606 | R1753059:0-1567 | cdRNA01-preDia | cdRNA04-Dia-R3  | 11.8124 | 63.2371 | 2.42046  | 0.0002   | 0.0481888 |
| RNA-Seq | Trans-ABySS | XLOC_012606 | R1753059:0-1567 | cdRNA01-preDia | cdRNA03-Dia-R2  | 11.8124 | 64.8664 | 2.45717  | 0.0001   | 0.0354705 |

|         |             |             |                 |                |                 |          |         |          |          |           |
|---------|-------------|-------------|-----------------|----------------|-----------------|----------|---------|----------|----------|-----------|
| RNA-Seq | Trans-ABySS | XLOC_012810 | R1753399:0-1253 | cdRNA01-preDia | cdRNA05-postDia | 8.34805  | 53.343  | 2.67579  | 5.00E-05 | 0.0195319 |
| RNA-Seq | Trans-ABySS | XLOC_012812 | R1753402:0-1157 | cdRNA01-preDia | cdRNA03-Dia-R2  | 74.9476  | 10.8126 | -2.79317 | 5.00E-05 | 0.0195319 |
| RNA-Seq | Trans-ABySS | XLOC_012812 | R1753402:0-1157 | cdRNA01-preDia | cdRNA04-Dia-R3  | 74.9476  | 10.975  | -2.77167 | 5.00E-05 | 0.0195319 |
| RNA-Seq | Trans-ABySS | XLOC_012812 | R1753402:0-1157 | cdRNA04-Dia-R3 | cdRNA05-postDia | 10.975   | 70.1154 | 2.67552  | 5.00E-05 | 0.0195319 |
| RNA-Seq | Trans-ABySS | XLOC_012812 | R1753402:0-1157 | cdRNA03-Dia-R2 | cdRNA05-postDia | 10.8126  | 70.1154 | 2.69702  | 5.00E-05 | 0.0195319 |
| RNA-Seq | Trans-ABySS | XLOC_012876 | R1753538:0-890  | cdRNA04-Dia-R3 | cdRNA05-postDia | 43.4369  | 5.68787 | -2.93296 | 5.00E-05 | 0.0195319 |
| RNA-Seq | Trans-ABySS | XLOC_012876 | R1753538:0-890  | cdRNA03-Dia-R2 | cdRNA05-postDia | 41.2912  | 5.68787 | -2.85988 | 5.00E-05 | 0.0195319 |
| RNA-Seq | Trans-ABySS | XLOC_013012 | R1753778:0-2015 | cdRNA04-Dia-R3 | cdRNA05-postDia | 35.5716  | 7.34512 | -2.27587 | 0.00015  | 0.0374403 |
| RNA-Seq | Trans-ABySS | XLOC_013081 | R1753913:0-369  | cdRNA01-preDia | cdRNA04-Dia-R3  | 3.468308 | 70.2122 | 3.46846  | 0.0002   | 0.0481888 |
| RNA-Seq | Trans-ABySS | XLOC_013081 | R1753913:0-369  | cdRNA01-preDia | cdRNA02-Dia-R1  | 6.34308  | 70.8853 | 3.48223  | 0.0002   | 0.0481888 |
| RNA-Seq | Trans-ABySS | XLOC_013081 | R1753913:0-369  | cdRNA01-preDia | cdRNA03-Dia-R2  | 6.34308  | 75.2537 | 3.56851  | 0.0002   | 0.0481888 |
| RNA-Seq | Trans-ABySS | XLOC_013132 | R1754014:0-659  | cdRNA03-Dia-R2 | cdRNA05-postDia | 26.078   | 2.53366 | -3.36354 | 5.00E-05 | 0.0195319 |
| RNA-Seq | Trans-ABySS | XLOC_013132 | R1754014:0-659  | cdRNA04-Dia-R3 | cdRNA05-postDia | 24.6756  | 2.53366 | -3.28379 | 5.00E-05 | 0.0195319 |
| RNA-Seq | Trans-ABySS | XLOC_013132 | R1754014:0-659  | cdRNA01-preDia | cdRNA04-Dia-R3  | 3.70888  | 24.6756 | 2.73403  | 0.0001   | 0.0354705 |
| RNA-Seq | Trans-ABySS | XLOC_013132 | R1754014:0-659  | cdRNA01-preDia | cdRNA03-Dia-R2  | 3.70888  | 26.078  | 2.81378  | 5.00E-05 | 0.0195319 |
| RNA-Seq | Trans-ABySS | XLOC_013161 | R1754060:0-2205 | cdRNA03-Dia-R2 | cdRNA05-postDia | 65.6749  | 7.60052 | -3.11117 | 5.00E-05 | 0.0195319 |
| RNA-Seq | Trans-ABySS | XLOC_013161 | R1754060:0-2205 | cdRNA04-Dia-R3 | cdRNA05-postDia | 64.4947  | 7.60052 | -3.08501 | 5.00E-05 | 0.0195319 |
| RNA-Seq | Trans-ABySS | XLOC_013161 | R1754060:0-2205 | cdRNA01-preDia | cdRNA04-Dia-R3  | 10.6447  | 64.4947 | 2.59905  | 0.0002   | 0.0481888 |
| RNA-Seq | Trans-ABySS | XLOC_013202 | R1754137:0-1614 | cdRNA03-Dia-R2 | cdRNA05-postDia | 33.98    | 6.15511 | -2.46483 | 0.00015  | 0.0374403 |
| RNA-Seq | Trans-ABySS | XLOC_013202 | R1754137:0-1614 | cdRNA04-Dia-R3 | cdRNA05-postDia | 31.8068  | 6.15511 | -2.36948 | 0.0001   | 0.0354705 |
| RNA-Seq | Trans-ABySS | XLOC_013226 | R1754182:0-830  | cdRNA01-preDia | cdRNA05-postDia | 15.1546  | 81.8084 | 2.43249  | 0.0001   | 0.0354705 |
| RNA-Seq | Trans-ABySS | XLOC_013239 | R1754215:0-1055 | cdRNA04-Dia-R3 | cdRNA05-postDia | 14.3973  | 69.1407 | 2.26374  | 0.0002   | 0.0481888 |
| RNA-Seq | Trans-ABySS | XLOC_013239 | R1754215:0-1055 | cdRNA02-Dia-R1 | cdRNA05-postDia | 9.82848  | 69.1407 | 2.8145   | 0.0001   | 0.0354705 |
| RNA-Seq | Trans-ABySS | XLOC_013270 | R1754256:1-741  | cdRNA01-preDia | cdRNA05-postDia | 10.7216  | 85.5351 | 2.99599  | 5.00E-05 | 0.0195319 |
| RNA-Seq | Trans-ABySS | XLOC_013338 | R1754387:4-496  | cdRNA01-preDia | cdRNA04-Dia-R3  | 38.3238  | 4.595   | -3.0601  | 5.00E-05 | 0.0195319 |
| RNA-Seq | Trans-ABySS | XLOC_013361 | R1754438:0-812  | cdRNA01-preDia | cdRNA04-Dia-R3  | 0.975204 | 25.4174 | 4.70397  | 0.0002   | 0.0481888 |
| RNA-Seq | Trans-ABySS | XLOC_013361 | R1754438:0-812  | cdRNA01-preDia | cdRNA03-Dia-R2  | 0.975204 | 26.1188 | 4.74324  | 0.0002   | 0.0481888 |
| RNA-Seq | Trans-ABySS | XLOC_013361 | R1754438:0-812  | cdRNA01-preDia | cdRNA05-postDia | 0.975204 | 34.4214 | 5.14146  | 0.0002   | 0.0481888 |
| RNA-Seq | Trans-ABySS | XLOC_013383 | R1754480:0-519  | cdRNA01-preDia | cdRNA05-postDia | 5.21241  | 39.412  | 2.91861  | 5.00E-05 | 0.0195319 |
| RNA-Seq | Trans-ABySS | XLOC_013457 | R1754613:0-305  | cdRNA01-preDia | cdRNA05-postDia | 17.0454  | 120.244 | 2.81851  | 0.0002   | 0.0481888 |
| RNA-Seq | Trans-ABySS | XLOC_013457 | R1754613:0-305  | cdRNA04-Dia-R3 | cdRNA05-postDia | 8.18171  | 120.244 | 3.87742  | 0.0001   | 0.0354705 |
| RNA-Seq | Trans-ABySS | XLOC_013457 | R1754613:0-305  | cdRNA03-Dia-R2 | cdRNA05-postDia | 8.12172  | 120.244 | 3.88804  | 0.00015  | 0.0374403 |
| RNA-Seq | Trans-ABySS | XLOC_013591 | R1754853:0-851  | cdRNA04-Dia-R3 | cdRNA05-postDia | 10.4251  | 54.482  | 2.38572  | 0.00015  | 0.0374403 |
| RNA-Seq | Trans-ABySS | XLOC_013591 | R1754853:0-851  | cdRNA03-Dia-R2 | cdRNA05-postDia | 10.3418  | 54.482  | 2.3973   | 0.0001   | 0.0354705 |
| RNA-Seq | Trans-ABySS | XLOC_013649 | R1754964:0-285  | cdRNA01-preDia | cdRNA05-postDia | 18.9356  | 153.402 | 3.01815  | 5.00E-05 | 0.0195319 |
| RNA-Seq | Trans-ABySS | XLOC_013662 | R1754987:0-256  | cdRNA01-preDia | cdRNA03-Dia-R2  | 165.82   | 11.2819 | -3.87754 | 0.0002   | 0.0481888 |
| RNA-Seq | Trans-ABySS | XLOC_013662 | R1754987:0-256  | cdRNA01-preDia | cdRNA04-Dia-R3  | 165.82   | 20.919  | -2.98673 | 0.0001   | 0.0354705 |
| RNA-Seq | Trans-ABySS | XLOC_013678 | R1755021:0-544  | cdRNA04-Dia-R3 | cdRNA05-postDia | 14.5646  | 78.8967 | 2.4375   | 0.0001   | 0.0354705 |
| RNA-Seq | Trans-ABySS | XLOC_013678 | R1755021:0-544  | cdRNA03-Dia-R2 | cdRNA05-postDia | 14.3004  | 78.8967 | 2.46391  | 5.00E-05 | 0.0195319 |
| RNA-Seq | Trans-ABySS | XLOC_013678 | R1755021:0-544  | cdRNA01-preDia | cdRNA05-postDia | 13.5485  | 78.8967 | 2.54183  | 5.00E-05 | 0.0195319 |
| RNA-Seq | Trans-ABySS | XLOC_013694 | R1755050:0-426  | cdRNA03-Dia-R2 | cdRNA05-postDia | 85.7934  | 16.776  | -2.35447 | 0.0001   | 0.0354705 |
| RNA-Seq | Trans-ABySS | XLOC_013832 | R1755292:1-244  | cdRNA01-preDia | cdRNA05-postDia | 53.4248  | 495.463 | 3.2132   | 5.00E-05 | 0.0195319 |
| RNA-Seq | Trans-ABySS | XLOC_013832 | R1755292:1-244  | cdRNA02-Dia-R1 | cdRNA05-postDia | 18.1117  | 495.463 | 4.77379  | 5.00E-05 | 0.0195319 |
| RNA-Seq | Trans-ABySS | XLOC_013832 | R1755292:1-244  | cdRNA04-Dia-R3 | cdRNA05-postDia | 16.6683  | 495.463 | 4.89359  | 5.00E-05 | 0.0195319 |
| RNA-Seq | Trans-ABySS | XLOC_013832 | R1755292:1-244  | cdRNA03-Dia-R2 | cdRNA05-postDia | 12.4407  | 495.463 | 5.31564  | 5.00E-05 | 0.0195319 |
| RNA-Seq | Trans-ABySS | XLOC_013833 | R1755293:3-481  | cdRNA01-preDia | cdRNA05-postDia | 22.4713  | 109.551 | 2.28545  | 0.00015  | 0.0374403 |
| RNA-Seq | Trans-ABySS | XLOC_013867 | R1755345:0-470  | cdRNA01-preDia | cdRNA05-postDia | 11.3163  | 98.6775 | 3.12431  | 5.00E-05 | 0.0195319 |

|         |             |             |                 |                |                 |          |         |          |          |           |
|---------|-------------|-------------|-----------------|----------------|-----------------|----------|---------|----------|----------|-----------|
| RNA-Seq | Trans-ABySS | XLOC_013909 | R1755422:0-601  | cdRNA03-Dia-R2 | cdRNA05-postDia | 9.10116  | 58.5229 | 2.68488  | 5.00E-05 | 0.0195319 |
| RNA-Seq | Trans-ABySS | XLOC_013932 | R1755461:0-515  | cdRNA02-Dia-R1 | cdRNA05-postDia | 2.26811  | 201.876 | 6.47583  | 5.00E-05 | 0.0195319 |
| RNA-Seq | Trans-ABySS | XLOC_013950 | R1755485:0-663  | cdRNA02-Dia-R1 | cdRNA05-postDia | 15.5875  | 89.0646 | 2.51446  | 5.00E-05 | 0.0195319 |
| RNA-Seq | Trans-ABySS | XLOC_013950 | R1755485:0-663  | cdRNA01-preDia | cdRNA05-postDia | 4.07403  | 89.0646 | 4.45032  | 5.00E-05 | 0.0195319 |
| RNA-Seq | Trans-ABySS | XLOC_014026 | R1755634:0-892  | cdRNA04-Dia-R3 | cdRNA05-postDia | 42.8763  | 5.80023 | -2.886   | 5.00E-05 | 0.0195319 |
| RNA-Seq | Trans-ABySS | XLOC_014026 | R1755634:0-892  | cdRNA03-Dia-R2 | cdRNA05-postDia | 41.7547  | 5.80023 | -2.84776 | 5.00E-05 | 0.0195319 |
| RNA-Seq | Trans-ABySS | XLOC_014041 | R1755655:0-645  | cdRNA01-preDia | cdRNA05-postDia | 3.61977  | 39.2114 | 3.4373   | 5.00E-05 | 0.0195319 |
| RNA-Seq | Trans-ABySS | XLOC_014185 | R1755933:0-703  | cdRNA01-preDia | cdRNA03-Dia-R2  | 12.7962  | 60.6086 | 2.24381  | 0.0002   | 0.0481888 |
| RNA-Seq | Trans-ABySS | XLOC_014261 | R1756069:0-2210 | cdRNA01-preDia | cdRNA03-Dia-R2  | 5.7297   | 27.2407 | 2.24923  | 0.0001   | 0.0354705 |
| RNA-Seq | Trans-ABySS | XLOC_014261 | R1756069:0-2210 | cdRNA01-preDia | cdRNA04-Dia-R3  | 5.7297   | 27.6659 | 2.27158  | 5.00E-05 | 0.0195319 |
| RNA-Seq | Trans-ABySS | XLOC_014287 | R1756110:0-872  | cdRNA01-preDia | cdRNA02-Dia-R1  | 77.7685  | 3.97251 | -4.29106 | 5.00E-05 | 0.0195319 |
| RNA-Seq | Trans-ABySS | XLOC_014287 | R1756110:0-872  | cdRNA01-preDia | cdRNA05-postDia | 77.7685  | 6.04026 | -3.6865  | 5.00E-05 | 0.0195319 |
| RNA-Seq | Trans-ABySS | XLOC_014287 | R1756110:0-872  | cdRNA01-preDia | cdRNA04-Dia-R3  | 77.7685  | 7.86061 | -3.30647 | 5.00E-05 | 0.0195319 |
| RNA-Seq | Trans-ABySS | XLOC_014287 | R1756110:0-872  | cdRNA01-preDia | cdRNA03-Dia-R2  | 77.7685  | 8.14688 | -3.25487 | 5.00E-05 | 0.0195319 |
| RNA-Seq | Trans-ABySS | XLOC_014429 | R1756383:0-1679 | cdRNA02-Dia-R1 | cdRNA05-postDia | 23.2971  | 1.50305 | -3.95419 | 5.00E-05 | 0.0195319 |
| RNA-Seq | Trans-ABySS | XLOC_014429 | R1756383:0-1679 | cdRNA04-Dia-R3 | cdRNA05-postDia | 21.8807  | 1.50305 | -3.8637  | 5.00E-05 | 0.0195319 |
| RNA-Seq | Trans-ABySS | XLOC_014429 | R1756383:0-1679 | cdRNA03-Dia-R2 | cdRNA05-postDia | 21.7747  | 1.50305 | -3.85669 | 5.00E-05 | 0.0195319 |
| RNA-Seq | Trans-ABySS | XLOC_014429 | R1756383:0-1679 | cdRNA01-preDia | cdRNA05-postDia | 20.0375  | 1.50305 | -3.73674 | 5.00E-05 | 0.0195319 |
| RNA-Seq | Trans-ABySS | XLOC_014433 | R1756391:0-1922 | cdRNA03-Dia-R2 | cdRNA05-postDia | 38.714   | 4.07784 | -3.24698 | 5.00E-05 | 0.0195319 |
| RNA-Seq | Trans-ABySS | XLOC_014433 | R1756391:0-1922 | cdRNA04-Dia-R3 | cdRNA05-postDia | 36.9257  | 4.07784 | -3.17875 | 5.00E-05 | 0.0195319 |
| RNA-Seq | Trans-ABySS | XLOC_014433 | R1756391:0-1922 | cdRNA02-Dia-R1 | cdRNA04-Dia-R3  | 6.60866  | 36.9257 | 2.48219  | 5.00E-05 | 0.0195319 |
| RNA-Seq | Trans-ABySS | XLOC_014433 | R1756391:0-1922 | cdRNA02-Dia-R1 | cdRNA03-Dia-R2  | 6.60866  | 38.714  | 2.55042  | 5.00E-05 | 0.0195319 |
| RNA-Seq | Trans-ABySS | XLOC_014433 | R1756391:0-1922 | cdRNA01-preDia | cdRNA04-Dia-R3  | 0.610613 | 36.9257 | 5.91822  | 5.00E-05 | 0.0195319 |
| RNA-Seq | Trans-ABySS | XLOC_014433 | R1756391:0-1922 | cdRNA01-preDia | cdRNA03-Dia-R2  | 0.610613 | 38.714  | 5.98645  | 5.00E-05 | 0.0195319 |
| RNA-Seq | Trans-ABySS | XLOC_014435 | R1756393:0-818  | cdRNA03-Dia-R2 | cdRNA05-postDia | 54.4879  | 12.132  | -2.16712 | 0.0002   | 0.0481888 |
| RNA-Seq | Trans-ABySS | XLOC_014630 | R1756747:0-1800 | cdRNA01-preDia | cdRNA03-Dia-R2  | 49.7539  | 8.80421 | -2.49854 | 5.00E-05 | 0.0195319 |
| RNA-Seq | Trans-ABySS | XLOC_014630 | R1756747:0-1800 | cdRNA01-preDia | cdRNA04-Dia-R3  | 49.7539  | 8.90725 | -2.48176 | 0.0001   | 0.0354705 |
| RNA-Seq | Trans-ABySS | XLOC_014689 | R1756847:0-1315 | cdRNA01-preDia | cdRNA05-postDia | 56.4069  | 6.18602 | -3.18879 | 5.00E-05 | 0.0195319 |
| RNA-Seq | Trans-ABySS | XLOC_014724 | R1756903:0-726  | cdRNA02-Dia-R1 | cdRNA05-postDia | 12.4194  | 101.759 | 3.0345   | 5.00E-05 | 0.0195319 |
| RNA-Seq | Trans-ABySS | XLOC_014724 | R1756903:0-726  | cdRNA04-Dia-R3 | cdRNA05-postDia | 12.349   | 101.759 | 3.0427   | 5.00E-05 | 0.0195319 |
| RNA-Seq | Trans-ABySS | XLOC_014724 | R1756903:0-726  | cdRNA03-Dia-R2 | cdRNA05-postDia | 11.7073  | 101.759 | 3.11969  | 5.00E-05 | 0.0195319 |
| RNA-Seq | Trans-ABySS | XLOC_014875 | R1757207:0-428  | cdRNA03-Dia-R2 | cdRNA05-postDia | 16.3286  | 85.7049 | 2.39198  | 0.0002   | 0.0481888 |
| RNA-Seq | Trans-ABySS | XLOC_014974 | R1757394:0-575  | cdRNA01-preDia | cdRNA03-Dia-R2  | 6.02382  | 51.7006 | 3.10143  | 5.00E-05 | 0.0195319 |
| RNA-Seq | Trans-ABySS | XLOC_014974 | R1757394:0-575  | cdRNA01-preDia | cdRNA04-Dia-R3  | 6.02382  | 53.0454 | 3.13848  | 5.00E-05 | 0.0195319 |
| RNA-Seq | Trans-ABySS | XLOC_014979 | R1757400:0-1144 | cdRNA04-Dia-R3 | cdRNA05-postDia | 14.76    | 86.9342 | 2.55823  | 5.00E-05 | 0.0195319 |
| RNA-Seq | Trans-ABySS | XLOC_014979 | R1757400:0-1144 | cdRNA03-Dia-R2 | cdRNA05-postDia | 13.9992  | 86.9342 | 2.63457  | 5.00E-05 | 0.0195319 |
| RNA-Seq | Trans-ABySS | XLOC_014979 | R1757400:0-1144 | cdRNA02-Dia-R1 | cdRNA05-postDia | 10.6132  | 86.9342 | 3.03407  | 5.00E-05 | 0.0195319 |
| RNA-Seq | Trans-ABySS | XLOC_015035 | R1757505:0-1033 | cdRNA01-preDia | cdRNA05-postDia | 8.08762  | 70.4407 | 3.12262  | 5.00E-05 | 0.0195319 |
| RNA-Seq | Trans-ABySS | XLOC_015198 | R1757839:0-259  | cdRNA01-preDia | cdRNA05-postDia | 180.912  | 22.9989 | -2.97565 | 5.00E-05 | 0.0195319 |
| RNA-Seq | Trans-ABySS | XLOC_015198 | R1757839:0-259  | cdRNA01-preDia | cdRNA03-Dia-R2  | 180.912  | 25.86   | -2.80649 | 5.00E-05 | 0.0195319 |
| RNA-Seq | Trans-ABySS | XLOC_015198 | R1757839:0-259  | cdRNA01-preDia | cdRNA04-Dia-R3  | 180.912  | 26.7023 | -2.76025 | 0.0001   | 0.0354705 |
| RNA-Seq | Trans-ABySS | XLOC_015205 | R1757849:0-329  | cdRNA02-Dia-R1 | cdRNA05-postDia | 15.6499  | 92.7861 | 2.56775  | 0.00015  | 0.0374403 |
| RNA-Seq | Trans-ABySS | XLOC_015205 | R1757849:0-329  | cdRNA03-Dia-R2 | cdRNA05-postDia | 11.9766  | 92.7861 | 2.95369  | 5.00E-05 | 0.0195319 |
| RNA-Seq | Trans-ABySS | XLOC_015205 | R1757849:0-329  | cdRNA01-preDia | cdRNA05-postDia | 5.04232  | 92.7861 | 4.20175  | 5.00E-05 | 0.0195319 |
| RNA-Seq | Trans-ABySS | XLOC_015208 | R1757857:1-537  | cdRNA01-preDia | cdRNA05-postDia | 6.59403  | 47.6774 | 2.85407  | 5.00E-05 | 0.0195319 |
| RNA-Seq | Trans-ABySS | XLOC_015217 | R1757875:0-62   | cdRNA01-preDia | cdRNA05-postDia | 11261.2  | 109476  | 3.28118  | 5.00E-05 | 0.0195319 |
| RNA-Seq | Trans-ABySS | XLOC_015217 | R1757875:0-62   | cdRNA02-Dia-R1 | cdRNA05-postDia | 10959.4  | 109476  | 3.32037  | 5.00E-05 | 0.0195319 |

|         |             |             |                 |                |                 |         |         |          |          |           |
|---------|-------------|-------------|-----------------|----------------|-----------------|---------|---------|----------|----------|-----------|
| RNA-Seq | Trans-ABySS | XLOC_015217 | R1757875:0-62   | cdRNA03-Dia-R2 | cdRNA05-postDia | 8260.32 | 109476  | 3.72827  | 0.0001   | 0.0354705 |
| RNA-Seq | Trans-ABySS | XLOC_015225 | R1757892:0-384  | cdRNA04-Dia-R3 | cdRNA05-postDia | 8.52883 | 64.223  | 2.91267  | 5.00E-05 | 0.0195319 |
| RNA-Seq | Trans-ABySS | XLOC_015225 | R1757892:0-384  | cdRNA01-preDia | cdRNA05-postDia | 6.32785 | 64.223  | 3.3433   | 5.00E-05 | 0.0195319 |
| RNA-Seq | Trans-ABySS | XLOC_015235 | R1757905:8-262  | cdRNA02-Dia-R1 | cdRNA05-postDia | 28.2826 | 183.077 | 2.69446  | 0.00015  | 0.0374403 |
| RNA-Seq | Trans-ABySS | XLOC_015244 | R1757917:0-293  | cdRNA03-Dia-R2 | cdRNA05-postDia | 21.9113 | 178.025 | 3.02233  | 5.00E-05 | 0.0195319 |
| RNA-Seq | Trans-ABySS | XLOC_015244 | R1757917:0-293  | cdRNA02-Dia-R1 | cdRNA05-postDia | 21.5212 | 178.025 | 3.04824  | 0.0001   | 0.0354705 |
| RNA-Seq | Trans-ABySS | XLOC_015244 | R1757917:0-293  | cdRNA04-Dia-R3 | cdRNA05-postDia | 14.1316 | 178.025 | 3.65508  | 5.00E-05 | 0.0195319 |
| RNA-Seq | Trans-ABySS | XLOC_015244 | R1757917:0-293  | cdRNA01-preDia | cdRNA05-postDia | 12.1758 | 178.025 | 3.86999  | 5.00E-05 | 0.0195319 |
| RNA-Seq | Trans-ABySS | XLOC_015344 | R1758096:0-350  | cdRNA01-preDia | cdRNA04-Dia-R3  | 9.01016 | 80.5536 | 3.16033  | 5.00E-05 | 0.0195319 |
| RNA-Seq | Trans-ABySS | XLOC_015344 | R1758096:0-350  | cdRNA01-preDia | cdRNA03-Dia-R2  | 9.01016 | 80.8291 | 3.16525  | 5.00E-05 | 0.0195319 |
| RNA-Seq | Trans-ABySS | XLOC_015376 | R1758139:0-327  | cdRNA01-preDia | cdRNA05-postDia | 23.0347 | 137.914 | 2.58189  | 5.00E-05 | 0.0195319 |
| RNA-Seq | Trans-ABySS | XLOC_015376 | R1758139:0-327  | cdRNA04-Dia-R3 | cdRNA05-postDia | 22.9291 | 137.914 | 2.58851  | 0.0002   | 0.0481888 |
| RNA-Seq | Trans-ABySS | XLOC_015603 | R1758539:0-1380 | cdRNA04-Dia-R3 | cdRNA05-postDia | 39.024  | 4.18514 | -3.22102 | 5.00E-05 | 0.0195319 |
| RNA-Seq | Trans-ABySS | XLOC_015603 | R1758539:0-1380 | cdRNA03-Dia-R2 | cdRNA05-postDia | 34.9732 | 4.18514 | -3.0629  | 5.00E-05 | 0.0195319 |
| RNA-Seq | Trans-ABySS | XLOC_015708 | R1758728:0-582  | cdRNA02-Dia-R1 | cdRNA05-postDia | 11.5521 | 76.244  | 2.72247  | 5.00E-05 | 0.0195319 |
| RNA-Seq | Trans-ABySS | XLOC_015742 | R1758783:0-1208 | cdRNA03-Dia-R2 | cdRNA05-postDia | 7.90855 | 45.1789 | 2.51416  | 0.0001   | 0.0354705 |
| RNA-Seq | Trans-ABySS | XLOC_015919 | R1759109:0-1127 | cdRNA01-preDia | cdRNA05-postDia | 32.9597 | 2.20978 | -3.89873 | 5.00E-05 | 0.0195319 |
| RNA-Seq | Trans-ABySS | XLOC_015919 | R1759109:0-1127 | cdRNA02-Dia-R1 | cdRNA05-postDia | 27.8769 | 2.20978 | -3.65709 | 5.00E-05 | 0.0195319 |
| RNA-Seq | Trans-ABySS | XLOC_015919 | R1759109:0-1127 | cdRNA03-Dia-R2 | cdRNA05-postDia | 22.763  | 2.20978 | -3.36472 | 5.00E-05 | 0.0195319 |
| RNA-Seq | Trans-ABySS | XLOC_015919 | R1759109:0-1127 | cdRNA04-Dia-R3 | cdRNA05-postDia | 20.767  | 2.20978 | -3.23232 | 5.00E-05 | 0.0195319 |
| RNA-Seq | Trans-ABySS | XLOC_015928 | R1759120:2-1249 | cdRNA04-Dia-R3 | cdRNA05-postDia | 6.54887 | 38.1756 | 2.54333  | 0.0001   | 0.0354705 |
| RNA-Seq | Trans-ABySS | XLOC_015965 | R1759186:5-236  | cdRNA02-Dia-R1 | cdRNA05-postDia | 27.1987 | 231.911 | 3.09196  | 5.00E-05 | 0.0195319 |
| RNA-Seq | Trans-ABySS | XLOC_015983 | R1759218:0-1654 | cdRNA01-preDia | cdRNA03-Dia-R2  | 1.41549 | 12.0903 | 3.09448  | 5.00E-05 | 0.0195319 |
| RNA-Seq | Trans-ABySS | XLOC_015983 | R1759218:0-1654 | cdRNA01-preDia | cdRNA04-Dia-R3  | 1.41549 | 13.4549 | 3.24876  | 5.00E-05 | 0.0195319 |
| RNA-Seq | Trans-ABySS | XLOC_015998 | R1759248:0-1059 | cdRNA01-preDia | cdRNA05-postDia | 10.6156 | 89.924  | 3.08252  | 5.00E-05 | 0.0195319 |
| RNA-Seq | Trans-ABySS | XLOC_015998 | R1759248:0-1059 | cdRNA03-Dia-R2 | cdRNA05-postDia | 8.34764 | 89.924  | 3.42927  | 5.00E-05 | 0.0195319 |
| RNA-Seq | Trans-ABySS | XLOC_015998 | R1759248:0-1059 | cdRNA04-Dia-R3 | cdRNA05-postDia | 8.18855 | 89.924  | 3.45703  | 5.00E-05 | 0.0195319 |
| RNA-Seq | Trans-ABySS | XLOC_015998 | R1759248:0-1059 | cdRNA02-Dia-R1 | cdRNA05-postDia | 6.52166 | 89.924  | 3.78539  | 5.00E-05 | 0.0195319 |
| RNA-Seq | Trans-ABySS | XLOC_016218 | R1759624:0-1024 | cdRNA01-preDia | cdRNA04-Dia-R3  | 5.56217 | 29.0502 | 2.38483  | 0.00015  | 0.0374403 |
| RNA-Seq | Trans-ABySS | XLOC_016244 | R1759676:3-1369 | cdRNA01-preDia | cdRNA03-Dia-R2  | 6.59422 | 32.976  | 2.32215  | 0.00015  | 0.0374403 |
| RNA-Seq | Trans-ABySS | XLOC_016304 | R1759796:0-500  | cdRNA02-Dia-R1 | cdRNA05-postDia | 1.92913 | 128.821 | 6.06128  | 0.0002   | 0.0481888 |
| RNA-Seq | Trans-ABySS | XLOC_016550 | R1760226:0-608  | cdRNA02-Dia-R1 | cdRNA05-postDia | 5.15489 | 45.8754 | 3.15371  | 0.0001   | 0.0354705 |
| RNA-Seq | Trans-ABySS | XLOC_016550 | R1760226:0-608  | cdRNA04-Dia-R3 | cdRNA05-postDia | 4.12102 | 45.8754 | 3.47665  | 5.00E-05 | 0.0195319 |
| RNA-Seq | Trans-ABySS | XLOC_016550 | R1760226:0-608  | cdRNA01-preDia | cdRNA05-postDia | 2.82234 | 45.8754 | 4.02276  | 5.00E-05 | 0.0195319 |
| RNA-Seq | Trans-ABySS | XLOC_016550 | R1760226:0-608  | cdRNA03-Dia-R2 | cdRNA05-postDia | 2.76033 | 45.8754 | 4.05481  | 5.00E-05 | 0.0195319 |
| RNA-Seq | Trans-ABySS | XLOC_016583 | R1760280:0-688  | cdRNA04-Dia-R3 | cdRNA05-postDia | 11.9955 | 69.4402 | 2.53328  | 5.00E-05 | 0.0195319 |
| RNA-Seq | Trans-ABySS | XLOC_016583 | R1760280:0-688  | cdRNA01-preDia | cdRNA05-postDia | 5.46558 | 69.4402 | 3.66733  | 0.0001   | 0.0354705 |
| RNA-Seq | Trans-ABySS | XLOC_016693 | R1760498:0-1734 | cdRNA01-preDia | cdRNA04-Dia-R3  | 3.45802 | 19.6432 | 2.50601  | 0.0001   | 0.0354705 |
| RNA-Seq | Trans-ABySS | XLOC_016694 | R1760499:5-964  | cdRNA01-preDia | cdRNA05-postDia | 31.5945 | 4.81569 | -2.71386 | 0.0001   | 0.0354705 |
| RNA-Seq | Trans-ABySS | XLOC_016925 | R1760931:0-347  | cdRNA04-Dia-R3 | cdRNA05-postDia | 11.2741 | 101.997 | 3.17745  | 5.00E-05 | 0.0195319 |
| RNA-Seq | Trans-ABySS | XLOC_016925 | R1760931:0-347  | cdRNA03-Dia-R2 | cdRNA05-postDia | 9.61035 | 101.997 | 3.4078   | 5.00E-05 | 0.0195319 |
| RNA-Seq | Trans-ABySS | XLOC_016925 | R1760931:0-347  | cdRNA01-preDia | cdRNA05-postDia | 8.24137 | 101.997 | 3.6295   | 5.00E-05 | 0.0195319 |
| RNA-Seq | Trans-ABySS | XLOC_017154 | R1761386:1-1563 | cdRNA03-Dia-R2 | cdRNA05-postDia | 9.32891 | 47.3111 | 2.3424   | 0.00015  | 0.0374403 |
| RNA-Seq | Trans-ABySS | XLOC_017192 | R1761442:0-1715 | cdRNA04-Dia-R3 | cdRNA05-postDia | 6.61125 | 35.4778 | 2.42392  | 0.00015  | 0.0374403 |
| RNA-Seq | Trans-ABySS | XLOC_017192 | R1761442:0-1715 | cdRNA03-Dia-R2 | cdRNA05-postDia | 6.22918 | 35.4778 | 2.50981  | 0.00015  | 0.0374403 |
| RNA-Seq | Trans-ABySS | XLOC_017455 | R1761923:0-618  | cdRNA01-preDia | cdRNA04-Dia-R3  | 21.152  | 1.54673 | -3.77351 | 0.00015  | 0.0374403 |
| RNA-Seq | Trans-ABySS | XLOC_017772 | R1762519:0-769  | cdRNA03-Dia-R2 | cdRNA05-postDia | 25.9749 | 3.76688 | -2.78568 | 5.00E-05 | 0.0195319 |



|         |             |             |                 |                |                 |         |         |          |          |           |
|---------|-------------|-------------|-----------------|----------------|-----------------|---------|---------|----------|----------|-----------|
| RNA-Seq | Trans-ABySS | XLOC_017772 | R1762519:0-769  | cdRNA04-Dia-R3 | cdRNA05-postDia | 24.5562 | 3.76688 | -2.70464 | 5.00E-05 | 0.0195319 |
| RNA-Seq | Trans-ABySS | XLOC_017876 | R1762701:4-637  | cdRNA03-Dia-R2 | cdRNA05-postDia | 36.2887 | 4.13417 | -3.13385 | 5.00E-05 | 0.0195319 |
| RNA-Seq | Trans-ABySS | XLOC_017876 | R1762701:4-637  | cdRNA04-Dia-R3 | cdRNA05-postDia | 35.724  | 4.13417 | -3.11122 | 5.00E-05 | 0.0195319 |
| RNA-Seq | Trans-ABySS | XLOC_018063 | R1763068:0-1101 | cdRNA02-Dia-R1 | cdRNA05-postDia | 1.42301 | 81.413  | 5.83824  | 5.00E-05 | 0.0195319 |
| RNA-Seq | Trans-ABySS | XLOC_018320 | R1763553:0-1324 | cdRNA01-preDia | cdRNA03-Dia-R2  | 1.79182 | 20.7506 | 3.53366  | 5.00E-05 | 0.0195319 |
| RNA-Seq | Trans-ABySS | XLOC_018320 | R1763553:0-1324 | cdRNA01-preDia | cdRNA04-Dia-R3  | 1.79182 | 21.8026 | 3.605    | 5.00E-05 | 0.0195319 |
| RNA-Seq | Trans-ABySS | XLOC_018320 | R1763553:0-1324 | cdRNA01-preDia | cdRNA05-postDia | 1.79182 | 27.554  | 3.94277  | 5.00E-05 | 0.0195319 |
| RNA-Seq | Trans-ABySS | XLOC_018478 | R1763868:0-1620 | cdRNA03-Dia-R2 | cdRNA05-postDia | 3.498   | 24.6634 | 2.81777  | 5.00E-05 | 0.0195319 |
| RNA-Seq | Trans-ABySS | XLOC_018478 | R1763868:0-1620 | cdRNA04-Dia-R3 | cdRNA05-postDia | 3.40976 | 24.6634 | 2.85463  | 5.00E-05 | 0.0195319 |
| RNA-Seq | Trans-ABySS | XLOC_018531 | R1763963:0-570  | cdRNA01-preDia | cdRNA05-postDia | 4.85996 | 34.6472 | 2.83372  | 0.0002   | 0.0481888 |
| RNA-Seq | Trans-ABySS | XLOC_018547 | R1763987:0-583  | cdRNA03-Dia-R2 | cdRNA05-postDia | 26.2462 | 3.50967 | -2.9027  | 5.00E-05 | 0.0195319 |
| RNA-Seq | Trans-ABySS | XLOC_018736 | R1764330:0-1776 | cdRNA01-preDia | cdRNA05-postDia | 25.2713 | 3.55397 | -2.83    | 5.00E-05 | 0.0195319 |
| RNA-Seq | Trans-ABySS | XLOC_018736 | R1764330:0-1776 | cdRNA02-Dia-R1 | cdRNA05-postDia | 18.6758 | 3.55397 | -2.39366 | 0.00015  | 0.0374403 |
| RNA-Seq | Trans-ABySS | XLOC_019193 | R1765203:0-278  | cdRNA04-Dia-R3 | cdRNA05-postDia | 8.98248 | 152.016 | 4.08097  | 0.0002   | 0.0481888 |
| RNA-Seq | Trans-ABySS | XLOC_019399 | R1765602:0-1761 | cdRNA03-Dia-R2 | cdRNA05-postDia | 16.1299 | 1.70867 | -3.23879 | 0.0002   | 0.0481888 |
| RNA-Seq | Trans-ABySS | XLOC_019399 | R1765602:0-1761 | cdRNA04-Dia-R3 | cdRNA05-postDia | 14.477  | 1.70867 | -3.08281 | 0.0002   | 0.0481888 |
| RNA-Seq | Trans-ABySS | XLOC_019399 | R1765602:0-1761 | cdRNA02-Dia-R1 | cdRNA05-postDia | 13.0954 | 1.70867 | -2.93812 | 0.0002   | 0.0481888 |
| RNA-Seq | Trans-ABySS | XLOC_019418 | R1765626:0-524  | cdRNA03-Dia-R2 | cdRNA05-postDia | 7.38796 | 48.911  | 2.72691  | 0.0001   | 0.0354705 |
| RNA-Seq | Trans-ABySS | XLOC_019418 | R1765626:0-524  | cdRNA04-Dia-R3 | cdRNA05-postDia | 7.20381 | 48.911  | 2.76333  | 5.00E-05 | 0.0195319 |
| RNA-Seq | Trans-ABySS | XLOC_019418 | R1765626:0-524  | cdRNA02-Dia-R1 | cdRNA05-postDia | 6.61296 | 48.911  | 2.88679  | 5.00E-05 | 0.0195319 |
| RNA-Seq | Trans-ABySS | XLOC_019443 | R1765662:0-788  | cdRNA04-Dia-R3 | cdRNA05-postDia | 5.84795 | 33.786  | 2.53042  | 5.00E-05 | 0.0195319 |
| RNA-Seq | Trans-ABySS | XLOC_019457 | R1765682:0-1358 | cdRNA02-Dia-R1 | cdRNA05-postDia | 3.69672 | 19.4419 | 2.39485  | 5.00E-05 | 0.0195319 |
| RNA-Seq | Trans-ABySS | XLOC_019517 | R1765786:0-482  | cdRNA01-preDia | cdRNA05-postDia | 24.6358 | 176.595 | 2.84162  | 5.00E-05 | 0.0195319 |
| RNA-Seq | Trans-ABySS | XLOC_019572 | R1765873:0-1253 | cdRNA03-Dia-R2 | cdRNA05-postDia | 2.45224 | 12.2582 | 2.32158  | 0.0002   | 0.0481888 |
| RNA-Seq | Trans-ABySS | XLOC_019897 | R1766493:2-1879 | cdRNA04-Dia-R3 | cdRNA05-postDia | 6.63452 | 33.9507 | 2.35538  | 0.0001   | 0.0354705 |
| RNA-Seq | Trans-ABySS | XLOC_019897 | R1766493:2-1879 | cdRNA01-preDia | cdRNA05-postDia | 5.61607 | 33.9507 | 2.59581  | 5.00E-05 | 0.0195319 |
| RNA-Seq | Trans-ABySS | XLOC_020003 | R1766664:4-852  | cdRNA02-Dia-R1 | cdRNA05-postDia | 6.78066 | 57.1456 | 3.07514  | 5.00E-05 | 0.0195319 |
| RNA-Seq | Trans-ABySS | XLOC_020003 | R1766664:4-852  | cdRNA04-Dia-R3 | cdRNA05-postDia | 6.0323  | 57.1456 | 3.24386  | 5.00E-05 | 0.0195319 |
| RNA-Seq | Trans-ABySS | XLOC_020003 | R1766664:4-852  | cdRNA03-Dia-R2 | cdRNA05-postDia | 6.02616 | 57.1456 | 3.24533  | 5.00E-05 | 0.0195319 |
| RNA-Seq | Trans-ABySS | XLOC_020003 | R1766664:4-852  | cdRNA01-preDia | cdRNA05-postDia | 2.33714 | 57.1456 | 4.61183  | 5.00E-05 | 0.0195319 |
| RNA-Seq | Trans-ABySS | XLOC_020175 | R1767015:0-982  | cdRNA04-Dia-R3 | cdRNA05-postDia | 16.2969 | 2.33666 | -2.80208 | 0.0001   | 0.0354705 |
| RNA-Seq | Trans-ABySS | XLOC_020175 | R1767015:0-982  | cdRNA03-Dia-R2 | cdRNA05-postDia | 15.9395 | 2.33666 | -2.77008 | 0.0001   | 0.0354705 |
| RNA-Seq | Trans-ABySS | XLOC_020213 | R1767080:0-836  | cdRNA02-Dia-R1 | cdRNA05-postDia | 6.9094  | 35.0787 | 2.34396  | 0.0002   | 0.0481888 |
| RNA-Seq | Trans-ABySS | XLOC_020213 | R1767080:0-836  | cdRNA04-Dia-R3 | cdRNA05-postDia | 6.55212 | 35.0787 | 2.42056  | 5.00E-05 | 0.0195319 |
| RNA-Seq | Trans-ABySS | XLOC_020213 | R1767080:0-836  | cdRNA03-Dia-R2 | cdRNA05-postDia | 5.92884 | 35.0787 | 2.56477  | 5.00E-05 | 0.0195319 |
| RNA-Seq | Trans-ABySS | XLOC_020839 | R1768349:0-721  | cdRNA03-Dia-R2 | cdRNA05-postDia | 5.69454 | 31.7321 | 2.47829  | 0.0001   | 0.0354705 |
| RNA-Seq | Trans-ABySS | XLOC_020839 | R1768349:0-721  | cdRNA04-Dia-R3 | cdRNA05-postDia | 3.8809  | 31.7321 | 3.03148  | 5.00E-05 | 0.0195319 |
| RNA-Seq | Trans-ABySS | XLOC_021013 | R1768628:0-1036 | cdRNA01-preDia | cdRNA04-Dia-R3  | 2.85061 | 21.0373 | 2.8836   | 5.00E-05 | 0.0195319 |
| RNA-Seq | Trans-ABySS | XLOC_021013 | R1768628:0-1036 | cdRNA01-preDia | cdRNA03-Dia-R2  | 2.85061 | 23.2689 | 3.02906  | 5.00E-05 | 0.0195319 |
| RNA-Seq | Trans-ABySS | XLOC_021799 | R1770204:0-976  | cdRNA01-preDia | cdRNA05-postDia | 1.59516 | 13.9566 | 3.12918  | 0.00015  | 0.0374403 |
| RNA-Seq | Trans-ABySS | XLOC_021855 | R1770302:1-673  | cdRNA02-Dia-R1 | cdRNA05-postDia | 7.17737 | 39.0336 | 2.44319  | 0.0002   | 0.0481888 |
| RNA-Seq | Trans-ABySS | XLOC_021855 | R1770302:1-673  | cdRNA04-Dia-R3 | cdRNA05-postDia | 7.11496 | 39.0336 | 2.45579  | 0.0002   | 0.0481888 |
| RNA-Seq | Trans-ABySS | XLOC_021855 | R1770302:1-673  | cdRNA03-Dia-R2 | cdRNA05-postDia | 6.10012 | 39.0336 | 2.67781  | 0.00015  | 0.0374403 |
| RNA-Seq | Trans-ABySS | XLOC_022699 | R1771914:0-1134 | cdRNA01-preDia | cdRNA03-Dia-R2  | 20.3037 | 3.69333 | -2.45875 | 0.0002   | 0.0481888 |
| RNA-Seq | Trans-ABySS | XLOC_022838 | R1772153:0-593  | cdRNA01-preDia | cdRNA04-Dia-R3  | 26.2633 | 3.62148 | -2.8584  | 5.00E-05 | 0.0195319 |
| RNA-Seq | Trans-ABySS | XLOC_022838 | R1772153:0-593  | cdRNA01-preDia | cdRNA03-Dia-R2  | 26.2633 | 4.35748 | -2.59148 | 0.0002   | 0.0481888 |
| RNA-Seq | Trans-ABySS | XLOC_023757 | R1774122:0-555  | cdRNA02-Dia-R1 | cdRNA05-postDia | 34.6424 | 2.65274 | -3.70698 | 0.0002   | 0.0481888 |

|         |             |             |                 |                |                 |         |         |          |          |           |
|---------|-------------|-------------|-----------------|----------------|-----------------|---------|---------|----------|----------|-----------|
| RNA-Seq | Trans-ABySS | XLOC_023765 | R1774137:0-1145 | cdRNA04-Dia-R3 | cdRNA05-postDia | 3.7201  | 17.9998 | 2.27457  | 0.00015  | 0.0374403 |
| RNA-Seq | Trans-ABySS | XLOC_023765 | R1774137:0-1145 | cdRNA03-Dia-R2 | cdRNA05-postDia | 3.36573 | 17.9998 | 2.41899  | 0.0002   | 0.0481888 |
| RNA-Seq | Trans-ABySS | XLOC_025087 | R1777048:0-519  | cdRNA01-preDia | cdRNA04-Dia-R3  | 33.8807 | 2.03282 | -4.05891 | 0.00015  | 0.0374403 |
| RNA-Seq | Trans-ABySS | XLOC_029303 | S1012078:0-441  | cdRNA01-preDia | cdRNA05-postDia | 4.61853 | 43.5896 | 3.23848  | 0.0001   | 0.0354705 |
| RNA-Seq | Trans-ABySS | XLOC_029497 | S1013860:0-387  | cdRNA01-preDia | cdRNA05-postDia | 19.4224 | 118.857 | 2.61343  | 0.00015  | 0.0374403 |
| RNA-Seq | Trans-ABySS | XLOC_029911 | S1017779:0-331  | cdRNA02-Dia-R1 | cdRNA05-postDia | 17.5095 | 102.8   | 2.55362  | 5.00E-05 | 0.0195319 |
| RNA-Seq | Trans-ABySS | XLOC_030525 | S1023104:0-920  | cdRNA02-Dia-R1 | cdRNA05-postDia | 4.78522 | 29.4152 | 2.6199   | 0.0001   | 0.0354705 |
| RNA-Seq | Trans-ABySS | XLOC_030837 | S1025990:0-423  | cdRNA03-Dia-R2 | cdRNA05-postDia | 9.36884 | 64.1756 | 2.77608  | 0.0001   | 0.0354705 |
| RNA-Seq | Trans-ABySS | XLOC_030837 | S1025990:0-423  | cdRNA02-Dia-R1 | cdRNA05-postDia | 7.82176 | 64.1756 | 3.03646  | 5.00E-05 | 0.0195319 |
| RNA-Seq | Trans-ABySS | XLOC_031223 | S1029596:0-1150 | cdRNA04-Dia-R3 | cdRNA05-postDia | 6.31781 | 35.4812 | 2.48956  | 0.0001   | 0.0354705 |
| RNA-Seq | Trans-ABySS | XLOC_031730 | S1034390:0-1526 | cdRNA04-Dia-R3 | cdRNA05-postDia | 6.13555 | 35.4183 | 2.52923  | 0.00015  | 0.0374403 |
| RNA-Seq | Trans-ABySS | XLOC_031730 | S1034390:0-1526 | cdRNA03-Dia-R2 | cdRNA05-postDia | 5.90498 | 35.4183 | 2.58449  | 0.00015  | 0.0374403 |
| RNA-Seq | Trans-ABySS | XLOC_034322 | S1059164:0-868  | cdRNA01-preDia | cdRNA05-postDia | 59.5535 | 7.54572 | -2.98046 | 5.00E-05 | 0.0195319 |
| RNA-Seq | Trans-ABySS | XLOC_034709 | S1062778:0-342  | cdRNA01-preDia | cdRNA05-postDia | 4.59176 | 79.3935 | 4.1119   | 5.00E-05 | 0.0195319 |
| RNA-Seq | Trans-ABySS | XLOC_035980 | S1073770:0-521  | cdRNA04-Dia-R3 | cdRNA05-postDia | 5.11732 | 53.2902 | 3.38041  | 5.00E-05 | 0.0195319 |
| RNA-Seq | Trans-ABySS | XLOC_035980 | S1073770:0-521  | cdRNA03-Dia-R2 | cdRNA05-postDia | 4.08072 | 53.2902 | 3.70697  | 5.00E-05 | 0.0195319 |
| RNA-Seq | Trans-ABySS | XLOC_036531 | S1078558:0-575  | cdRNA04-Dia-R3 | cdRNA05-postDia | 13.1175 | 76.6069 | 2.54598  | 5.00E-05 | 0.0195319 |
| RNA-Seq | Trans-ABySS | XLOC_037194 | S108458:0-559   | cdRNA03-Dia-R2 | cdRNA05-postDia | 9.54961 | 66.5705 | 2.80137  | 5.00E-05 | 0.0195319 |
| RNA-Seq | Trans-ABySS | XLOC_037194 | S108458:0-559   | cdRNA04-Dia-R3 | cdRNA05-postDia | 9.37964 | 66.5705 | 2.82728  | 5.00E-05 | 0.0195319 |
| RNA-Seq | Trans-ABySS | XLOC_037299 | S1085387:0-302  | cdRNA03-Dia-R2 | cdRNA05-postDia | 11.8489 | 94.2215 | 2.99131  | 0.0002   | 0.0481888 |
| RNA-Seq | Trans-ABySS | XLOC_037596 | S1087868:2-1160 | cdRNA01-preDia | cdRNA05-postDia | 62.6299 | 2.0915  | -4.90424 | 5.00E-05 | 0.0195319 |
| RNA-Seq | Trans-ABySS | XLOC_037596 | S1087868:2-1160 | cdRNA01-preDia | cdRNA02-Dia-R1  | 62.6299 | 3.30976 | -4.24205 | 5.00E-05 | 0.0195319 |
| RNA-Seq | Trans-ABySS | XLOC_037596 | S1087868:2-1160 | cdRNA01-preDia | cdRNA04-Dia-R3  | 62.6299 | 5.05662 | -3.63061 | 5.00E-05 | 0.0195319 |
| RNA-Seq | Trans-ABySS | XLOC_037596 | S1087868:2-1160 | cdRNA01-preDia | cdRNA03-Dia-R2  | 62.6299 | 5.37725 | -3.54191 | 5.00E-05 | 0.0195319 |
| RNA-Seq | Trans-ABySS | XLOC_037631 | S1088120:0-1222 | cdRNA01-preDia | cdRNA03-Dia-R2  | 38.7102 | 3.94371 | -3.29509 | 5.00E-05 | 0.0195319 |
| RNA-Seq | Trans-ABySS | XLOC_037631 | S1088120:0-1222 | cdRNA01-preDia | cdRNA04-Dia-R3  | 38.7102 | 4.40323 | -3.13608 | 5.00E-05 | 0.0195319 |
| RNA-Seq | Trans-ABySS | XLOC_037631 | S1088120:0-1222 | cdRNA02-Dia-R1 | cdRNA05-postDia | 8.67812 | 42.5104 | 2.29236  | 0.0001   | 0.0354705 |
| RNA-Seq | Trans-ABySS | XLOC_037631 | S1088120:0-1222 | cdRNA04-Dia-R3 | cdRNA05-postDia | 4.40323 | 42.5104 | 3.27118  | 5.00E-05 | 0.0195319 |
| RNA-Seq | Trans-ABySS | XLOC_037631 | S1088120:0-1222 | cdRNA03-Dia-R2 | cdRNA05-postDia | 3.94371 | 42.5104 | 3.43019  | 5.00E-05 | 0.0195319 |
| RNA-Seq | Trans-ABySS | XLOC_038790 | S1098319:0-549  | cdRNA03-Dia-R2 | cdRNA05-postDia | 2.32731 | 24.2899 | 3.38362  | 0.0002   | 0.0481888 |
| RNA-Seq | Trans-ABySS | XLOC_039314 | S1103126:0-394  | cdRNA01-preDia | cdRNA05-postDia | 14.6341 | 147.63  | 3.33458  | 0.0001   | 0.0354705 |
| RNA-Seq | Trans-ABySS | XLOC_040193 | S1111262:0-1138 | cdRNA01-preDia | cdRNA04-Dia-R3  | 26.6139 | 2.37676 | -3.48511 | 5.00E-05 | 0.0195319 |
| RNA-Seq | Trans-ABySS | XLOC_040193 | S1111262:0-1138 | cdRNA01-preDia | cdRNA03-Dia-R2  | 26.6139 | 3.00887 | -3.14488 | 5.00E-05 | 0.0195319 |
| RNA-Seq | Trans-ABySS | XLOC_040483 | S1113675:0-920  | cdRNA03-Dia-R2 | cdRNA05-postDia | 8.03684 | 58.0873 | 2.85352  | 5.00E-05 | 0.0195319 |
| RNA-Seq | Trans-ABySS | XLOC_040483 | S1113675:0-920  | cdRNA04-Dia-R3 | cdRNA05-postDia | 7.69139 | 58.0873 | 2.91691  | 5.00E-05 | 0.0195319 |
| RNA-Seq | Trans-ABySS | XLOC_040483 | S1113675:0-920  | cdRNA01-preDia | cdRNA05-postDia | 7.07077 | 58.0873 | 3.03828  | 5.00E-05 | 0.0195319 |
| RNA-Seq | Trans-ABySS | XLOC_040483 | S1113675:0-920  | cdRNA02-Dia-R1 | cdRNA05-postDia | 5.67659 | 58.0873 | 3.35513  | 5.00E-05 | 0.0195319 |
| RNA-Seq | Trans-ABySS | XLOC_042131 | S1128148:0-559  | cdRNA01-preDia | cdRNA05-postDia | 24.7958 | 1.87347 | -3.72631 | 0.0002   | 0.0481888 |
| RNA-Seq | Trans-ABySS | XLOC_042646 | S1132859:0-528  | cdRNA04-Dia-R3 | cdRNA05-postDia | 8.30069 | 51.0441 | 2.62044  | 0.0002   | 0.0481888 |
| RNA-Seq | Trans-ABySS | XLOC_042646 | S1132859:0-528  | cdRNA03-Dia-R2 | cdRNA05-postDia | 7.43443 | 51.0441 | 2.77945  | 5.00E-05 | 0.0195319 |
| RNA-Seq | Trans-ABySS | XLOC_042646 | S1132859:0-528  | cdRNA02-Dia-R1 | cdRNA05-postDia | 6.22031 | 51.0441 | 3.03669  | 0.0001   | 0.0354705 |
| RNA-Seq | Trans-ABySS | XLOC_043063 | S1136297:0-462  | cdRNA02-Dia-R1 | cdRNA05-postDia | 21.8721 | 143.326 | 2.71213  | 5.00E-05 | 0.0195319 |
| RNA-Seq | Trans-ABySS | XLOC_043063 | S1136297:0-462  | cdRNA01-preDia | cdRNA05-postDia | 5.30328 | 143.326 | 4.75627  | 5.00E-05 | 0.0195319 |
| RNA-Seq | Trans-ABySS | XLOC_043063 | S1136297:0-462  | cdRNA03-Dia-R2 | cdRNA05-postDia | 4.49519 | 143.326 | 4.99477  | 5.00E-05 | 0.0195319 |
| RNA-Seq | Trans-ABySS | XLOC_043063 | S1136297:0-462  | cdRNA04-Dia-R3 | cdRNA05-postDia | 3.47467 | 143.326 | 5.36628  | 5.00E-05 | 0.0195319 |
| RNA-Seq | Trans-ABySS | XLOC_044707 | S1150153:0-675  | cdRNA01-preDia | cdRNA05-postDia | 26.4359 | 130.099 | 2.29904  | 0.00015  | 0.0374403 |
| RNA-Seq | Trans-ABySS | XLOC_044707 | S1150153:0-675  | cdRNA04-Dia-R3 | cdRNA05-postDia | 19.7587 | 130.099 | 2.71905  | 5.00E-05 | 0.0195319 |

|         |             |             |                |                |                 |         |         |          |          |           |
|---------|-------------|-------------|----------------|----------------|-----------------|---------|---------|----------|----------|-----------|
| RNA-Seq | Trans-ABySS | XLOC_044707 | S1150153:0-675 | cdRNA02-Dia-R1 | cdRNA05-postDia | 18.0431 | 130.099 | 2.85009  | 5.00E-05 | 0.0195319 |
| RNA-Seq | Trans-ABySS | XLOC_044707 | S1150153:0-675 | cdRNA03-Dia-R2 | cdRNA05-postDia | 17.7103 | 130.099 | 2.87695  | 5.00E-05 | 0.0195319 |
| RNA-Seq | Trans-ABySS | XLOC_045010 | S1152996:0-410 | cdRNA01-preDia | cdRNA05-postDia | 10.6252 | 63.0516 | 2.56905  | 0.0001   | 0.0354705 |
| RNA-Seq | Trans-ABySS | XLOC_045010 | S1152996:0-410 | cdRNA02-Dia-R1 | cdRNA05-postDia | 9.12937 | 63.0516 | 2.78795  | 0.0002   | 0.0481888 |
| RNA-Seq | Trans-ABySS | XLOC_046550 | S116667:1-775  | cdRNA01-preDia | cdRNA03-Dia-R2  | 25.9254 | 4.38248 | -2.56455 | 0.0002   | 0.0481888 |
| RNA-Seq | Trans-ABySS | XLOC_046550 | S116667:1-775  | cdRNA02-Dia-R1 | cdRNA05-postDia | 9.66456 | 52.3515 | 2.43746  | 0.0001   | 0.0354705 |
| RNA-Seq | Trans-ABySS | XLOC_046550 | S116667:1-775  | cdRNA04-Dia-R3 | cdRNA05-postDia | 5.84179 | 52.3515 | 3.16375  | 5.00E-05 | 0.0195319 |
| RNA-Seq | Trans-ABySS | XLOC_046550 | S116667:1-775  | cdRNA03-Dia-R2 | cdRNA05-postDia | 4.38248 | 52.3515 | 3.57841  | 5.00E-05 | 0.0195319 |
| RNA-Seq | Trans-ABySS | XLOC_049709 | S1193909:0-843 | cdRNA03-Dia-R2 | cdRNA05-postDia | 3.21118 | 20.6085 | 2.68206  | 0.0001   | 0.0354705 |
| RNA-Seq | Trans-ABySS | XLOC_049865 | S119526:0-1408 | cdRNA04-Dia-R3 | cdRNA05-postDia | 9.53799 | 58.8498 | 2.62528  | 5.00E-05 | 0.0195319 |
| RNA-Seq | Trans-ABySS | XLOC_050036 | S1196816:0-627 | cdRNA01-preDia | cdRNA03-Dia-R2  | 3.12687 | 25.7308 | 3.0407   | 5.00E-05 | 0.0195319 |
| RNA-Seq | Trans-ABySS | XLOC_050036 | S1196816:0-627 | cdRNA01-preDia | cdRNA04-Dia-R3  | 3.12687 | 27.4505 | 3.13405  | 5.00E-05 | 0.0195319 |
| RNA-Seq | Trans-ABySS | XLOC_050193 | S1198265:0-969 | cdRNA01-preDia | cdRNA05-postDia | 7.21409 | 36.1672 | 2.32579  | 0.0001   | 0.0354705 |
| RNA-Seq | Trans-ABySS | XLOC_050257 | S1198872:0-599 | cdRNA01-preDia | cdRNA04-Dia-R3  | 3.46398 | 31.9901 | 3.20713  | 5.00E-05 | 0.0195319 |
| RNA-Seq | Trans-ABySS | XLOC_050257 | S1198872:0-599 | cdRNA01-preDia | cdRNA03-Dia-R2  | 3.46398 | 35.6855 | 3.36484  | 5.00E-05 | 0.0195319 |
| RNA-Seq | Trans-ABySS | XLOC_050383 | S1199734:0-656 | cdRNA04-Dia-R3 | cdRNA05-postDia | 5.76122 | 33.6467 | 2.54602  | 5.00E-05 | 0.0195319 |
| RNA-Seq | Trans-ABySS | XLOC_053034 | S1223550:9-344 | cdRNA02-Dia-R1 | cdRNA05-postDia | 17.0052 | 185.607 | 3.4482   | 5.00E-05 | 0.0195319 |
| RNA-Seq | Trans-ABySS | XLOC_053034 | S1223550:9-344 | cdRNA03-Dia-R2 | cdRNA05-postDia | 12.471  | 185.607 | 3.89559  | 5.00E-05 | 0.0195319 |
| RNA-Seq | Trans-ABySS | XLOC_053034 | S1223550:9-344 | cdRNA04-Dia-R3 | cdRNA05-postDia | 9.35446 | 185.607 | 4.31045  | 5.00E-05 | 0.0195319 |
| RNA-Seq | Trans-ABySS | XLOC_053034 | S1223550:9-344 | cdRNA01-preDia | cdRNA05-postDia | 5.51404 | 185.607 | 5.073    | 5.00E-05 | 0.0195319 |
| RNA-Seq | Trans-ABySS | XLOC_053988 | S1231754:0-447 | cdRNA01-preDia | cdRNA04-Dia-R3  | 9.75975 | 52.7021 | 2.43294  | 0.0002   | 0.0481888 |
| RNA-Seq | Trans-ABySS | XLOC_054457 | S1235595:0-484 | cdRNA01-preDia | cdRNA03-Dia-R2  | 6.18971 | 43.8098 | 2.82331  | 0.00015  | 0.0374403 |
| RNA-Seq | Trans-ABySS | XLOC_054457 | S1235595:0-484 | cdRNA01-preDia | cdRNA04-Dia-R3  | 6.18971 | 45.1283 | 2.86609  | 0.0001   | 0.0354705 |
| RNA-Seq | Trans-ABySS | XLOC_055405 | S1243407:1-912 | cdRNA04-Dia-R3 | cdRNA05-postDia | 36.1085 | 3.3239  | -3.44139 | 5.00E-05 | 0.0195319 |
| RNA-Seq | Trans-ABySS | XLOC_055405 | S1243407:1-912 | cdRNA03-Dia-R2 | cdRNA05-postDia | 34.5756 | 3.3239  | -3.37881 | 5.00E-05 | 0.0195319 |
| RNA-Seq | Trans-ABySS | XLOC_055779 | S1246452:0-377 | cdRNA01-preDia | cdRNA02-Dia-R1  | 64.7547 | 3.29567 | -4.29634 | 0.00015  | 0.0374403 |
| RNA-Seq | Trans-ABySS | XLOC_056484 | S1252807:0-814 | cdRNA04-Dia-R3 | cdRNA05-postDia | 2.86933 | 18.6807 | 2.70276  | 5.00E-05 | 0.0195319 |
| RNA-Seq | Trans-ABySS | XLOC_056689 | S1254679:0-667 | cdRNA03-Dia-R2 | cdRNA05-postDia | 10.5015 | 57.1716 | 2.44471  | 5.00E-05 | 0.0195319 |
| RNA-Seq | Trans-ABySS | XLOC_056750 | S1255476:0-886 | cdRNA02-Dia-R1 | cdRNA04-Dia-R3  | 16.4997 | 2.12825 | -2.9547  | 0.0002   | 0.0481888 |
| RNA-Seq | Trans-ABySS | XLOC_056750 | S1255476:0-886 | cdRNA02-Dia-R1 | cdRNA05-postDia | 16.4997 | 102.072 | 2.62908  | 0.0001   | 0.0354705 |
| RNA-Seq | Trans-ABySS | XLOC_056750 | S1255476:0-886 | cdRNA01-preDia | cdRNA05-postDia | 5.3501  | 102.072 | 4.25387  | 5.00E-05 | 0.0195319 |
| RNA-Seq | Trans-ABySS | XLOC_056750 | S1255476:0-886 | cdRNA03-Dia-R2 | cdRNA05-postDia | 2.61628 | 102.072 | 5.28593  | 5.00E-05 | 0.0195319 |
| RNA-Seq | Trans-ABySS | XLOC_056750 | S1255476:0-886 | cdRNA04-Dia-R3 | cdRNA05-postDia | 2.12825 | 102.072 | 5.58378  | 5.00E-05 | 0.0195319 |
| RNA-Seq | Trans-ABySS | XLOC_056802 | S125602:0-653  | cdRNA02-Dia-R1 | cdRNA05-postDia | 15.3362 | 78.6056 | 2.35769  | 0.0001   | 0.0354705 |
| RNA-Seq | Trans-ABySS | XLOC_056802 | S125602:0-653  | cdRNA03-Dia-R2 | cdRNA05-postDia | 13.0145 | 78.6056 | 2.59451  | 5.00E-05 | 0.0195319 |
| RNA-Seq | Trans-ABySS | XLOC_057346 | S1260801:0-218 | cdRNA03-Dia-R2 | cdRNA05-postDia | 273.307 | 34.1051 | -3.00246 | 5.00E-05 | 0.0195319 |
| RNA-Seq | Trans-ABySS | XLOC_057346 | S1260801:0-218 | cdRNA04-Dia-R3 | cdRNA05-postDia | 262.692 | 34.1051 | -2.94531 | 0.0001   | 0.0354705 |
| RNA-Seq | Trans-ABySS | XLOC_057545 | S1262664:0-701 | cdRNA02-Dia-R1 | cdRNA05-postDia | 8.11029 | 60.6653 | 2.90305  | 5.00E-05 | 0.0195319 |
| RNA-Seq | Trans-ABySS | XLOC_057545 | S1262664:0-701 | cdRNA03-Dia-R2 | cdRNA05-postDia | 7.98801 | 60.6653 | 2.92496  | 5.00E-05 | 0.0195319 |
| RNA-Seq | Trans-ABySS | XLOC_057545 | S1262664:0-701 | cdRNA04-Dia-R3 | cdRNA05-postDia | 5.75497 | 60.6653 | 3.39799  | 5.00E-05 | 0.0195319 |
| RNA-Seq | Trans-ABySS | XLOC_057545 | S1262664:0-701 | cdRNA01-preDia | cdRNA05-postDia | 2.66131 | 60.6653 | 4.51066  | 5.00E-05 | 0.0195319 |
| RNA-Seq | Trans-ABySS | XLOC_059518 | S127993:0-252  | cdRNA04-Dia-R3 | cdRNA05-postDia | 22.6657 | 145.663 | 2.68405  | 0.00015  | 0.0374403 |
| RNA-Seq | Trans-ABySS | XLOC_059617 | S1280851:0-133 | cdRNA02-Dia-R1 | cdRNA05-postDia | 182.903 | 2911.82 | 3.99278  | 5.00E-05 | 0.0195319 |
| RNA-Seq | Trans-ABySS | XLOC_060161 | S1285732:0-962 | cdRNA04-Dia-R3 | cdRNA05-postDia | 26.7518 | 4.56265 | -2.55169 | 0.0002   | 0.0481888 |
| RNA-Seq | Trans-ABySS | XLOC_060634 | S1290082:2-249 | cdRNA01-preDia | cdRNA05-postDia | 34.6355 | 207.507 | 2.58284  | 0.0002   | 0.0481888 |
| RNA-Seq | Trans-ABySS | XLOC_061697 | S1299818:0-223 | cdRNA03-Dia-R2 | cdRNA05-postDia | 33.9941 | 264.869 | 2.96192  | 5.00E-05 | 0.0195319 |
| RNA-Seq | Trans-ABySS | XLOC_061697 | S1299818:0-223 | cdRNA04-Dia-R3 | cdRNA05-postDia | 27.2857 | 264.869 | 3.27906  | 5.00E-05 | 0.0195319 |

|         |             |             |                 |                |                 |         |         |          |          |           |
|---------|-------------|-------------|-----------------|----------------|-----------------|---------|---------|----------|----------|-----------|
| RNA-Seq | Trans-ABySS | XLOC_063733 | S1317278:0-1086 | cdRNA01-preDia | cdRNA05-postDia | 7.65335 | 40.6196 | 2.40801  | 0.0001   | 0.0354705 |
| RNA-Seq | Trans-ABySS | XLOC_063733 | S1317278:0-1086 | cdRNA02-Dia-R1 | cdRNA05-postDia | 6.58861 | 40.6196 | 2.62413  | 5.00E-05 | 0.0195319 |
| RNA-Seq | Trans-ABySS | XLOC_064522 | S132416:0-478   | cdRNA01-preDia | cdRNA04-Dia-R3  | 69.2448 | 8.25735 | -3.06796 | 5.00E-05 | 0.0195319 |
| RNA-Seq | Trans-ABySS | XLOC_064522 | S132416:0-478   | cdRNA01-preDia | cdRNA03-Dia-R2  | 69.2448 | 9.4422  | -2.87451 | 5.00E-05 | 0.0195319 |
| RNA-Seq | Trans-ABySS | XLOC_065495 | S1332848:0-462  | cdRNA02-Dia-R1 | cdRNA05-postDia | 19.5287 | 169.447 | 3.11717  | 5.00E-05 | 0.0195319 |
| RNA-Seq | Trans-ABySS | XLOC_065495 | S1332848:0-462  | cdRNA03-Dia-R2 | cdRNA05-postDia | 10.3735 | 169.447 | 4.02986  | 5.00E-05 | 0.0195319 |
| RNA-Seq | Trans-ABySS | XLOC_065495 | S1332848:0-462  | cdRNA04-Dia-R3 | cdRNA05-postDia | 9.92763 | 169.447 | 4.09324  | 5.00E-05 | 0.0195319 |
| RNA-Seq | Trans-ABySS | XLOC_065495 | S1332848:0-462  | cdRNA01-preDia | cdRNA05-postDia | 6.01039 | 169.447 | 4.81723  | 5.00E-05 | 0.0195319 |
| RNA-Seq | Trans-ABySS | XLOC_065634 | S1334054:0-143  | cdRNA02-Dia-R1 | cdRNA05-postDia | 170.718 | 1154.23 | 2.75724  | 5.00E-05 | 0.0195319 |
| RNA-Seq | Trans-ABySS | XLOC_066457 | S1341310:2-98   | cdRNA04-Dia-R3 | cdRNA05-postDia | 620.582 | 6826.46 | 3.45944  | 0.0002   | 0.0481888 |
| RNA-Seq | Trans-ABySS | XLOC_066457 | S1341310:2-98   | cdRNA01-preDia | cdRNA05-postDia | 542.473 | 6826.46 | 3.65351  | 0.0002   | 0.0481888 |
| RNA-Seq | Trans-ABySS | XLOC_066752 | S1343884:0-578  | cdRNA02-Dia-R1 | cdRNA05-postDia | 10.5081 | 61.6475 | 2.55255  | 5.00E-05 | 0.0195319 |
| RNA-Seq | Trans-ABySS | XLOC_067114 | S1346977:0-637  | cdRNA02-Dia-R1 | cdRNA05-postDia | 25.2119 | 152.473 | 2.59638  | 0.0001   | 0.0354705 |
| RNA-Seq | Trans-ABySS | XLOC_067114 | S1346977:0-637  | cdRNA03-Dia-R2 | cdRNA05-postDia | 18.2343 | 152.473 | 3.06383  | 5.00E-05 | 0.0195319 |
| RNA-Seq | Trans-ABySS | XLOC_067114 | S1346977:0-637  | cdRNA04-Dia-R3 | cdRNA05-postDia | 15.9717 | 152.473 | 3.25497  | 5.00E-05 | 0.0195319 |
| RNA-Seq | Trans-ABySS | XLOC_067970 | S1354548:0-441  | cdRNA01-preDia | cdRNA04-Dia-R3  | 20.0136 | 105.911 | 2.4038   | 0.0001   | 0.0354705 |
| RNA-Seq | Trans-ABySS | XLOC_067970 | S1354548:0-441  | cdRNA01-preDia | cdRNA03-Dia-R2  | 20.0136 | 110.668 | 2.46718  | 0.0001   | 0.0354705 |
| RNA-Seq | Trans-ABySS | XLOC_068379 | S1358228:0-1797 | cdRNA01-preDia | cdRNA05-postDia | 24.9095 | 5.01017 | -2.31376 | 5.00E-05 | 0.0195319 |
| RNA-Seq | Trans-ABySS | XLOC_069254 | S1366535:0-347  | cdRNA01-preDia | cdRNA05-postDia | 27.5769 | 146.679 | 2.41113  | 0.0001   | 0.0354705 |
| RNA-Seq | Trans-ABySS | XLOC_069254 | S1366535:0-347  | cdRNA02-Dia-R1 | cdRNA05-postDia | 24.2783 | 146.679 | 2.59492  | 0.0001   | 0.0354705 |
| RNA-Seq | Trans-ABySS | XLOC_070181 | S1375561:0-318  | cdRNA02-Dia-R1 | cdRNA05-postDia | 11.8418 | 79.3002 | 2.74343  | 0.0001   | 0.0354705 |
| RNA-Seq | Trans-ABySS | XLOC_070666 | S1379828:0-194  | cdRNA01-preDia | cdRNA05-postDia | 54.346  | 378.634 | 2.80056  | 5.00E-05 | 0.0195319 |
| RNA-Seq | Trans-ABySS | XLOC_070666 | S1379828:0-194  | cdRNA03-Dia-R2 | cdRNA05-postDia | 53.152  | 378.634 | 2.83261  | 0.00015  | 0.0374403 |
| RNA-Seq | Trans-ABySS | XLOC_070666 | S1379828:0-194  | cdRNA02-Dia-R1 | cdRNA05-postDia | 52.0319 | 378.634 | 2.86334  | 0.0002   | 0.0481888 |
| RNA-Seq | Trans-ABySS | XLOC_070684 | S1380031:0-1583 | cdRNA04-Dia-R3 | cdRNA05-postDia | 6.34631 | 42.7001 | 2.75025  | 5.00E-05 | 0.0195319 |
| RNA-Seq | Trans-ABySS | XLOC_070684 | S1380031:0-1583 | cdRNA03-Dia-R2 | cdRNA05-postDia | 6.08143 | 42.7001 | 2.81176  | 5.00E-05 | 0.0195319 |
| RNA-Seq | Trans-ABySS | XLOC_070998 | S1382809:0-656  | cdRNA04-Dia-R3 | cdRNA05-postDia | 8.9724  | 46.5953 | 2.37662  | 0.0002   | 0.0481888 |
| RNA-Seq | Trans-ABySS | XLOC_070998 | S1382809:0-656  | cdRNA02-Dia-R1 | cdRNA05-postDia | 5.49925 | 46.5953 | 3.08288  | 5.00E-05 | 0.0195319 |
| RNA-Seq | Trans-ABySS | XLOC_072495 | S1396318:0-168  | cdRNA02-Dia-R1 | cdRNA05-postDia | 130.634 | 1100.03 | 3.07395  | 5.00E-05 | 0.0195319 |
| RNA-Seq | Trans-ABySS | XLOC_072495 | S1396318:0-168  | cdRNA03-Dia-R2 | cdRNA05-postDia | 80.7579 | 1100.03 | 3.7678   | 5.00E-05 | 0.0195319 |
| RNA-Seq | Trans-ABySS | XLOC_072495 | S1396318:0-168  | cdRNA04-Dia-R3 | cdRNA05-postDia | 71.5617 | 1100.03 | 3.94222  | 5.00E-05 | 0.0195319 |
| RNA-Seq | Trans-ABySS | XLOC_073725 | S1406973:0-535  | cdRNA03-Dia-R2 | cdRNA05-postDia | 6.06434 | 41.3916 | 2.77092  | 5.00E-05 | 0.0195319 |
| RNA-Seq | Trans-ABySS | XLOC_073725 | S1406973:0-535  | cdRNA04-Dia-R3 | cdRNA05-postDia | 5.80368 | 41.3916 | 2.8343   | 0.0001   | 0.0354705 |
| RNA-Seq | Trans-ABySS | XLOC_073725 | S1406973:0-535  | cdRNA01-preDia | cdRNA05-postDia | 2.48023 | 41.3916 | 4.06079  | 0.00015  | 0.0374403 |
| RNA-Seq | Trans-ABySS | XLOC_074735 | S1415054:0-540  | cdRNA02-Dia-R1 | cdRNA05-postDia | 16.5949 | 106.492 | 2.68193  | 5.00E-05 | 0.0195319 |
| RNA-Seq | Trans-ABySS | XLOC_074735 | S1415054:0-540  | cdRNA03-Dia-R2 | cdRNA05-postDia | 13.9396 | 106.492 | 2.93349  | 5.00E-05 | 0.0195319 |
| RNA-Seq | Trans-ABySS | XLOC_074735 | S1415054:0-540  | cdRNA04-Dia-R3 | cdRNA05-postDia | 13.3404 | 106.492 | 2.99687  | 5.00E-05 | 0.0195319 |
| RNA-Seq | Trans-ABySS | XLOC_074874 | S1416294:0-175  | cdRNA03-Dia-R2 | cdRNA05-postDia | 84.8612 | 843.514 | 3.31323  | 5.00E-05 | 0.0195319 |
| RNA-Seq | Trans-ABySS | XLOC_074874 | S1416294:0-175  | cdRNA04-Dia-R3 | cdRNA05-postDia | 59.0644 | 843.514 | 3.83605  | 0.0001   | 0.0354705 |
| RNA-Seq | Trans-ABySS | XLOC_074874 | S1416294:0-175  | cdRNA02-Dia-R1 | cdRNA05-postDia | 58.0929 | 843.514 | 3.85998  | 0.00015  | 0.0374403 |
| RNA-Seq | Trans-ABySS | XLOC_074874 | S1416294:0-175  | cdRNA01-preDia | cdRNA05-postDia | 49.9571 | 843.514 | 4.07765  | 0.0001   | 0.0354705 |
| RNA-Seq | Trans-ABySS | XLOC_075417 | S1421424:0-572  | cdRNA03-Dia-R2 | cdRNA05-postDia | 6.54556 | 36.9891 | 2.49851  | 0.0002   | 0.0481888 |
| RNA-Seq | Trans-ABySS | XLOC_075417 | S1421424:0-572  | cdRNA04-Dia-R3 | cdRNA05-postDia | 5.45218 | 36.9891 | 2.7622   | 0.00015  | 0.0374403 |
| RNA-Seq | Trans-ABySS | XLOC_075417 | S1421424:0-572  | cdRNA02-Dia-R1 | cdRNA05-postDia | 4.29    | 36.9891 | 3.10805  | 5.00E-05 | 0.0195319 |
| RNA-Seq | Trans-ABySS | XLOC_075417 | S1421424:0-572  | cdRNA01-preDia | cdRNA05-postDia | 3.09843 | 36.9891 | 3.57749  | 5.00E-05 | 0.0195319 |
| RNA-Seq | Trans-ABySS | XLOC_075746 | S1424237:0-479  | cdRNA04-Dia-R3 | cdRNA05-postDia | 11.0215 | 62.8797 | 2.51227  | 5.00E-05 | 0.0195319 |
| RNA-Seq | Trans-ABySS | XLOC_075746 | S1424237:0-479  | cdRNA02-Dia-R1 | cdRNA05-postDia | 8.55004 | 62.8797 | 2.87859  | 5.00E-05 | 0.0195319 |

|         |             |             |                 |                |                 |          |         |          |          |           |
|---------|-------------|-------------|-----------------|----------------|-----------------|----------|---------|----------|----------|-----------|
| RNA-Seq | Trans-ABySS | XLOC_076714 | S1432936:0-598  | cdRNA01-preDia | cdRNA05-postDia | 91.681   | 2.81338 | -5.02625 | 5.00E-05 | 0.0195319 |
| RNA-Seq | Trans-ABySS | XLOC_076714 | S1432936:0-598  | cdRNA01-preDia | cdRNA02-Dia-R1  | 91.681   | 3.15438 | -4.86119 | 5.00E-05 | 0.0195319 |
| RNA-Seq | Trans-ABySS | XLOC_076714 | S1432936:0-598  | cdRNA01-preDia | cdRNA04-Dia-R3  | 91.681   | 5.63415 | -4.02435 | 5.00E-05 | 0.0195319 |
| RNA-Seq | Trans-ABySS | XLOC_076714 | S1432936:0-598  | cdRNA01-preDia | cdRNA03-Dia-R2  | 91.681   | 5.8872  | -3.96097 | 5.00E-05 | 0.0195319 |
| RNA-Seq | Trans-ABySS | XLOC_076747 | S1433264:0-229  | cdRNA03-Dia-R2 | cdRNA05-postDia | 26.1145  | 191.687 | 2.87583  | 0.0002   | 0.0481888 |
| RNA-Seq | Trans-ABySS | XLOC_077119 | S1436200:0-944  | cdRNA01-preDia | cdRNA03-Dia-R2  | 19.4766  | 2.89346 | -2.75087 | 0.0001   | 0.0354705 |
| RNA-Seq | Trans-ABySS | XLOC_077223 | S1437041:0-251  | cdRNA01-preDia | cdRNA03-Dia-R2  | 170.845  | 17.9829 | -3.24799 | 5.00E-05 | 0.0195319 |
| RNA-Seq | Trans-ABySS | XLOC_077231 | S1437113:0-238  | cdRNA01-preDia | cdRNA05-postDia | 17.2168  | 233.442 | 3.76117  | 0.0001   | 0.0354705 |
| RNA-Seq | Trans-ABySS | XLOC_077346 | S143827:0-655   | cdRNA01-preDia | cdRNA05-postDia | 13.0456  | 92.2174 | 2.82147  | 5.00E-05 | 0.0195319 |
| RNA-Seq | Trans-ABySS | XLOC_077346 | S143827:0-655   | cdRNA02-Dia-R1 | cdRNA05-postDia | 5.58593  | 92.2174 | 4.04517  | 5.00E-05 | 0.0195319 |
| RNA-Seq | Trans-ABySS | XLOC_077346 | S143827:0-655   | cdRNA03-Dia-R2 | cdRNA05-postDia | 3.95628  | 92.2174 | 4.54282  | 5.00E-05 | 0.0195319 |
| RNA-Seq | Trans-ABySS | XLOC_077346 | S143827:0-655   | cdRNA04-Dia-R3 | cdRNA05-postDia | 2.93433  | 92.2174 | 4.97394  | 5.00E-05 | 0.0195319 |
| RNA-Seq | Trans-ABySS | XLOC_077894 | S1443347:0-792  | cdRNA01-preDia | cdRNA03-Dia-R2  | 16.9872  | 1.36553 | -3.63691 | 0.00015  | 0.0374403 |
| RNA-Seq | Trans-ABySS | XLOC_077980 | S1444045:0-670  | cdRNA04-Dia-R3 | cdRNA05-postDia | 5.58814  | 47.5742 | 3.08974  | 5.00E-05 | 0.0195319 |
| RNA-Seq | Trans-ABySS | XLOC_077980 | S1444045:0-670  | cdRNA03-Dia-R2 | cdRNA05-postDia | 3.82894  | 47.5742 | 3.63516  | 5.00E-05 | 0.0195319 |
| RNA-Seq | Trans-ABySS | XLOC_078235 | S1446301:0-802  | cdRNA01-preDia | cdRNA05-postDia | 14.7964  | 89.1236 | 2.59056  | 0.0001   | 0.0354705 |
| RNA-Seq | Trans-ABySS | XLOC_078235 | S1446301:0-802  | cdRNA02-Dia-R1 | cdRNA05-postDia | 7.41458  | 89.1236 | 3.58737  | 5.00E-05 | 0.0195319 |
| RNA-Seq | Trans-ABySS | XLOC_078235 | S1446301:0-802  | cdRNA03-Dia-R2 | cdRNA05-postDia | 3.58053  | 89.1236 | 4.63756  | 5.00E-05 | 0.0195319 |
| RNA-Seq | Trans-ABySS | XLOC_078235 | S1446301:0-802  | cdRNA04-Dia-R3 | cdRNA05-postDia | 2.71274  | 89.1236 | 5.03798  | 5.00E-05 | 0.0195319 |
| RNA-Seq | Trans-ABySS | XLOC_078703 | S1450467:0-716  | cdRNA02-Dia-R1 | cdRNA05-postDia | 7.47906  | 39.9226 | 2.41628  | 0.00015  | 0.0374403 |
| RNA-Seq | Trans-ABySS | XLOC_079926 | S1461029:0-558  | cdRNA01-preDia | cdRNA05-postDia | 6.44193  | 42.2095 | 2.712    | 5.00E-05 | 0.0195319 |
| RNA-Seq | Trans-ABySS | XLOC_082173 | S1481014:0-515  | cdRNA03-Dia-R2 | cdRNA05-postDia | 9.75319  | 57.4547 | 2.55848  | 5.00E-05 | 0.0195319 |
| RNA-Seq | Trans-ABySS | XLOC_082173 | S1481014:0-515  | cdRNA04-Dia-R3 | cdRNA05-postDia | 9.05944  | 57.4547 | 2.66493  | 0.0001   | 0.0354705 |
| RNA-Seq | Trans-ABySS | XLOC_082397 | S1482963:0-54   | cdRNA01-preDia | cdRNA04-Dia-R3  | 1.73E+06 | 82543   | -4.39159 | 5.00E-05 | 0.0195319 |
| RNA-Seq | Trans-ABySS | XLOC_082397 | S1482963:0-54   | cdRNA01-preDia | cdRNA03-Dia-R2  | 1.73E+06 | 93437.9 | -4.21273 | 5.00E-05 | 0.0195319 |
| RNA-Seq | Trans-ABySS | XLOC_082397 | S1482963:0-54   | cdRNA01-preDia | cdRNA02-Dia-R1  | 1.73E+06 | 316623  | -2.45204 | 5.00E-05 | 0.0195319 |
| RNA-Seq | Trans-ABySS | XLOC_082397 | S1482963:0-54   | cdRNA01-preDia | cdRNA05-postDia | 1.73E+06 | 332212  | -2.3827  | 0.0001   | 0.0354705 |
| RNA-Seq | Trans-ABySS | XLOC_082543 | S1484308:0-259  | cdRNA02-Dia-R1 | cdRNA05-postDia | 29.2097  | 213.754 | 2.87144  | 5.00E-05 | 0.0195319 |
| RNA-Seq | Trans-ABySS | XLOC_082543 | S1484308:0-259  | cdRNA01-preDia | cdRNA05-postDia | 10.4372  | 213.754 | 4.35614  | 0.00015  | 0.0374403 |
| RNA-Seq | Trans-ABySS | XLOC_082796 | S1486602:0-838  | cdRNA03-Dia-R2 | cdRNA05-postDia | 3.37722  | 27.4149 | 3.02105  | 0.0001   | 0.0354705 |
| RNA-Seq | Trans-ABySS | XLOC_082796 | S1486602:0-838  | cdRNA04-Dia-R3 | cdRNA05-postDia | 1.88537  | 27.4149 | 3.86204  | 5.00E-05 | 0.0195319 |
| RNA-Seq | Trans-ABySS | XLOC_083167 | S1489694:0-340  | cdRNA01-preDia | cdRNA05-postDia | 20.9529  | 141.939 | 2.76005  | 5.00E-05 | 0.0195319 |
| RNA-Seq | Trans-ABySS | XLOC_083167 | S1489694:0-340  | cdRNA04-Dia-R3 | cdRNA05-postDia | 19.6117  | 141.939 | 2.85549  | 0.00015  | 0.0374403 |
| RNA-Seq | Trans-ABySS | XLOC_083167 | S1489694:0-340  | cdRNA03-Dia-R2 | cdRNA05-postDia | 18.5409  | 141.939 | 2.93649  | 5.00E-05 | 0.0195319 |
| RNA-Seq | Trans-ABySS | XLOC_083267 | S1490525:0-651  | cdRNA04-Dia-R3 | cdRNA05-postDia | 5.06164  | 38.7843 | 2.93779  | 5.00E-05 | 0.0195319 |
| RNA-Seq | Trans-ABySS | XLOC_083267 | S1490525:0-651  | cdRNA03-Dia-R2 | cdRNA05-postDia | 4.09148  | 38.7843 | 3.24478  | 5.00E-05 | 0.0195319 |
| RNA-Seq | Trans-ABySS | XLOC_084538 | S1501937:0-275  | cdRNA01-preDia | cdRNA04-Dia-R3  | 51.8394  | 281.859 | 2.44285  | 5.00E-05 | 0.0195319 |
| RNA-Seq | Trans-ABySS | XLOC_084538 | S1501937:0-275  | cdRNA01-preDia | cdRNA03-Dia-R2  | 51.8394  | 312.178 | 2.59025  | 5.00E-05 | 0.0195319 |
| RNA-Seq | Trans-ABySS | XLOC_085723 | S1513084:10-326 | cdRNA04-Dia-R3 | cdRNA05-postDia | 11.1909  | 99.5724 | 3.15342  | 0.00015  | 0.0374403 |
| RNA-Seq | Trans-ABySS | XLOC_090466 | S155526:0-1206  | cdRNA02-Dia-R1 | cdRNA05-postDia | 4.5592   | 41.5962 | 3.1896   | 5.00E-05 | 0.0195319 |
| RNA-Seq | Trans-ABySS | XLOC_090466 | S155526:0-1206  | cdRNA03-Dia-R2 | cdRNA05-postDia | 4.31832  | 41.5962 | 3.26791  | 5.00E-05 | 0.0195319 |
| RNA-Seq | Trans-ABySS | XLOC_090466 | S155526:0-1206  | cdRNA04-Dia-R3 | cdRNA05-postDia | 3.62144  | 41.5962 | 3.52182  | 5.00E-05 | 0.0195319 |
| RNA-Seq | Trans-ABySS | XLOC_090548 | S1555939:0-369  | cdRNA02-Dia-R1 | cdRNA05-postDia | 13.4052  | 83.9172 | 2.64617  | 0.0001   | 0.0354705 |
| RNA-Seq | Trans-ABySS | XLOC_090548 | S1555939:0-369  | cdRNA04-Dia-R3 | cdRNA05-postDia | 12.9066  | 83.9172 | 2.70085  | 0.0001   | 0.0354705 |
| RNA-Seq | Trans-ABySS | XLOC_090548 | S1555939:0-369  | cdRNA03-Dia-R2 | cdRNA05-postDia | 13.2166  | 83.9172 | 2.66661  | 5.00E-05 | 0.0195319 |
| RNA-Seq | Trans-ABySS | XLOC_091466 | S1564474:0-621  | cdRNA02-Dia-R1 | cdRNA05-postDia | 7.16908  | 46.1465 | 2.68636  | 5.00E-05 | 0.0195319 |
| RNA-Seq | Trans-ABySS | XLOC_091466 | S1564474:0-621  | cdRNA04-Dia-R3 | cdRNA05-postDia | 5.83527  | 46.1465 | 2.98335  | 5.00E-05 | 0.0195319 |

|         |             |             |                |                |                 |         |         |          |          |           |
|---------|-------------|-------------|----------------|----------------|-----------------|---------|---------|----------|----------|-----------|
| RNA-Seq | Trans-ABySS | XLOC_091466 | S1564474:0-621 | cdRNA03-Dia-R2 | cdRNA05-postDia | 5.66947 | 46.1465 | 3.02494  | 5.00E-05 | 0.0195319 |
| RNA-Seq | Trans-ABySS | XLOC_091466 | S1564474:0-621 | cdRNA01-preDia | cdRNA05-postDia | 2.51561 | 46.1465 | 4.19724  | 5.00E-05 | 0.0195319 |
| RNA-Seq | Trans-ABySS | XLOC_092038 | S1570002:0-754 | cdRNA04-Dia-R3 | cdRNA05-postDia | 24.8378 | 3.06344 | -3.01931 | 5.00E-05 | 0.0195319 |
| RNA-Seq | Trans-ABySS | XLOC_092038 | S1570002:0-754 | cdRNA03-Dia-R2 | cdRNA05-postDia | 23.1958 | 3.06344 | -2.92064 | 0.0001   | 0.0354705 |
| RNA-Seq | Trans-ABySS | XLOC_092113 | S1570691:0-395 | cdRNA03-Dia-R2 | cdRNA05-postDia | 12.6043 | 65.1947 | 2.37084  | 0.00015  | 0.0374403 |
| RNA-Seq | Trans-ABySS | XLOC_093272 | S1581330:0-619 | cdRNA01-preDia | cdRNA04-Dia-R3  | 28.4645 | 5.45193 | -2.38432 | 0.0002   | 0.0481888 |
| RNA-Seq | Trans-ABySS | XLOC_093298 | S1581480:0-63  | cdRNA04-Dia-R3 | cdRNA05-postDia | 48768.2 | 312128  | 2.67813  | 5.00E-05 | 0.0195319 |
| RNA-Seq | Trans-ABySS | XLOC_093298 | S1581480:0-63  | cdRNA03-Dia-R2 | cdRNA05-postDia | 44760.9 | 312128  | 2.80183  | 5.00E-05 | 0.0195319 |
| RNA-Seq | Trans-ABySS | XLOC_095359 | S1600634:0-517 | cdRNA02-Dia-R1 | cdRNA03-Dia-R2  | 9.55104 | 53.0148 | 2.47266  | 0.00015  | 0.0374403 |
| RNA-Seq | Trans-ABySS | XLOC_095359 | S1600634:0-517 | cdRNA02-Dia-R1 | cdRNA04-Dia-R3  | 9.55104 | 56.4643 | 2.56361  | 0.00015  | 0.0374403 |
| RNA-Seq | Trans-ABySS | XLOC_095359 | S1600634:0-517 | cdRNA01-preDia | cdRNA03-Dia-R2  | 1.89429 | 53.0148 | 4.80667  | 0.0002   | 0.0481888 |
| RNA-Seq | Trans-ABySS | XLOC_095359 | S1600634:0-517 | cdRNA01-preDia | cdRNA04-Dia-R3  | 1.89429 | 56.4643 | 4.89761  | 0.0002   | 0.0481888 |
| RNA-Seq | Trans-ABySS | XLOC_097520 | S162011:1-209  | cdRNA03-Dia-R2 | cdRNA05-postDia | 38.8782 | 335.38  | 3.10876  | 0.0001   | 0.0354705 |
| RNA-Seq | Trans-ABySS | XLOC_097520 | S162011:1-209  | cdRNA04-Dia-R3 | cdRNA05-postDia | 38.5359 | 335.38  | 3.12152  | 0.0001   | 0.0354705 |
| RNA-Seq | Trans-ABySS | XLOC_097520 | S162011:1-209  | cdRNA02-Dia-R1 | cdRNA05-postDia | 34.504  | 335.38  | 3.28096  | 0.0002   | 0.0481888 |
| RNA-Seq | Trans-ABySS | XLOC_097674 | S1621546:0-509 | cdRNA03-Dia-R2 | cdRNA05-postDia | 13.6013 | 79.3731 | 2.5449   | 0.0001   | 0.0354705 |
| RNA-Seq | Trans-ABySS | XLOC_097674 | S1621546:0-509 | cdRNA04-Dia-R3 | cdRNA05-postDia | 12.7368 | 79.3731 | 2.63965  | 5.00E-05 | 0.0195319 |
| RNA-Seq | Trans-ABySS | XLOC_097674 | S1621546:0-509 | cdRNA01-preDia | cdRNA05-postDia | 7.92542 | 79.3731 | 3.32409  | 5.00E-05 | 0.0195319 |
| RNA-Seq | Trans-ABySS | XLOC_097674 | S1621546:0-509 | cdRNA02-Dia-R1 | cdRNA05-postDia | 7.04831 | 79.3731 | 3.4933   | 0.0001   | 0.0354705 |
| RNA-Seq | Trans-ABySS | XLOC_098193 | S1626087:0-822 | cdRNA04-Dia-R3 | cdRNA05-postDia | 18.0984 | 2.08065 | -3.12075 | 5.00E-05 | 0.0195319 |
| RNA-Seq | Trans-ABySS | XLOC_098193 | S1626087:0-822 | cdRNA03-Dia-R2 | cdRNA05-postDia | 17.2511 | 2.08065 | -3.05158 | 5.00E-05 | 0.0195319 |
| RNA-Seq | Trans-ABySS | XLOC_098886 | S1632319:0-660 | cdRNA02-Dia-R1 | cdRNA05-postDia | 17.6053 | 83.7192 | 2.24955  | 0.00015  | 0.0374403 |
| RNA-Seq | Trans-ABySS | XLOC_098886 | S1632319:0-660 | cdRNA01-preDia | cdRNA05-postDia | 14.4029 | 83.7192 | 2.5392   | 5.00E-05 | 0.0195319 |
| RNA-Seq | Trans-ABySS | XLOC_098886 | S1632319:0-660 | cdRNA04-Dia-R3 | cdRNA05-postDia | 9.82987 | 83.7192 | 3.09031  | 5.00E-05 | 0.0195319 |
| RNA-Seq | Trans-ABySS | XLOC_098886 | S1632319:0-660 | cdRNA03-Dia-R2 | cdRNA05-postDia | 9.0975  | 83.7192 | 3.20202  | 5.00E-05 | 0.0195319 |
| RNA-Seq | Trans-ABySS | XLOC_099528 | S1637997:0-161 | cdRNA01-preDia | cdRNA05-postDia | 147.077 | 1244.98 | 3.08148  | 5.00E-05 | 0.0195319 |
| RNA-Seq | Trans-ABySS | XLOC_099528 | S1637997:0-161 | cdRNA04-Dia-R3 | cdRNA05-postDia | 94.0131 | 1244.98 | 3.72712  | 0.0001   | 0.0354705 |
| RNA-Seq | Trans-ABySS | XLOC_099528 | S1637997:0-161 | cdRNA03-Dia-R2 | cdRNA05-postDia | 80.6935 | 1244.98 | 3.94752  | 5.00E-05 | 0.0195319 |
| RNA-Seq | Trans-ABySS | XLOC_099528 | S1637997:0-161 | cdRNA02-Dia-R1 | cdRNA05-postDia | 60.7639 | 1244.98 | 4.35676  | 0.00015  | 0.0374403 |
| RNA-Seq | Trans-ABySS | XLOC_100232 | S1644217:1-453 | cdRNA04-Dia-R3 | cdRNA05-postDia | 4.47543 | 37.9019 | 3.08217  | 0.0002   | 0.0481888 |
| RNA-Seq | Trans-ABySS | XLOC_100232 | S1644217:1-453 | cdRNA02-Dia-R1 | cdRNA05-postDia | 3.65689 | 37.9019 | 3.37358  | 0.0002   | 0.0481888 |
| RNA-Seq | Trans-ABySS | XLOC_101290 | S165397:1-232  | cdRNA02-Dia-R1 | cdRNA05-postDia | 33.0795 | 222.207 | 2.7479   | 0.0002   | 0.0481888 |
| RNA-Seq | Trans-ABySS | XLOC_102617 | S1665380:1-850 | cdRNA04-Dia-R3 | cdRNA05-postDia | 3.11075 | 24.4039 | 2.97178  | 5.00E-05 | 0.0195319 |
| RNA-Seq | Trans-ABySS | XLOC_102617 | S1665380:1-850 | cdRNA02-Dia-R1 | cdRNA05-postDia | 2.86429 | 24.4039 | 3.09086  | 5.00E-05 | 0.0195319 |
| RNA-Seq | Trans-ABySS | XLOC_102617 | S1665380:1-850 | cdRNA03-Dia-R2 | cdRNA05-postDia | 2.76635 | 24.4039 | 3.14105  | 5.00E-05 | 0.0195319 |
| RNA-Seq | Trans-ABySS | XLOC_102617 | S1665380:1-850 | cdRNA01-preDia | cdRNA05-postDia | 1.97995 | 24.4039 | 3.62357  | 5.00E-05 | 0.0195319 |
| RNA-Seq | Trans-ABySS | XLOC_102977 | S1668651:4-825 | cdRNA01-preDia | cdRNA05-postDia | 3.99176 | 24.3615 | 2.60951  | 0.00015  | 0.0374403 |
| RNA-Seq | Trans-ABySS | XLOC_103326 | S1671996:0-238 | cdRNA02-Dia-R1 | cdRNA05-postDia | 44.7129 | 272.203 | 2.60592  | 5.00E-05 | 0.0195319 |
| RNA-Seq | Trans-ABySS | XLOC_103444 | S1673034:0-452 | cdRNA04-Dia-R3 | cdRNA05-postDia | 23.7542 | 112.275 | 2.24079  | 0.0002   | 0.0481888 |
| RNA-Seq | Trans-ABySS | XLOC_103444 | S1673034:0-452 | cdRNA02-Dia-R1 | cdRNA05-postDia | 23.2958 | 112.275 | 2.2689   | 5.00E-05 | 0.0195319 |
| RNA-Seq | Trans-ABySS | XLOC_103444 | S1673034:0-452 | cdRNA01-preDia | cdRNA05-postDia | 22.6202 | 112.275 | 2.31136  | 0.00015  | 0.0374403 |
| RNA-Seq | Trans-ABySS | XLOC_103506 | S1673520:1-168 | cdRNA01-preDia | cdRNA04-Dia-R3  | 100.066 | 652.698 | 2.70546  | 0.0001   | 0.0354705 |
| RNA-Seq | Trans-ABySS | XLOC_103506 | S1673520:1-168 | cdRNA01-preDia | cdRNA03-Dia-R2  | 100.066 | 688.13  | 2.78173  | 0.0001   | 0.0354705 |
| RNA-Seq | Trans-ABySS | XLOC_105227 | S1688711:0-255 | cdRNA02-Dia-R1 | cdRNA05-postDia | 23.107  | 225.568 | 3.28716  | 0.00015  | 0.0374403 |
| RNA-Seq | Trans-ABySS | XLOC_105227 | S1688711:0-255 | cdRNA03-Dia-R2 | cdRNA05-postDia | 15.6997 | 225.568 | 3.84476  | 0.0002   | 0.0481888 |
| RNA-Seq | Trans-ABySS | XLOC_105620 | S1692035:0-393 | cdRNA02-Dia-R1 | cdRNA05-postDia | 42.0938 | 270.787 | 2.68548  | 5.00E-05 | 0.0195319 |
| RNA-Seq | Trans-ABySS | XLOC_105904 | S1694236:0-197 | cdRNA02-Dia-R1 | cdRNA05-postDia | 121.312 | 768.97  | 2.66421  | 5.00E-05 | 0.0195319 |

|         |             |             |                 |                |                 |         |         |          |          |           |
|---------|-------------|-------------|-----------------|----------------|-----------------|---------|---------|----------|----------|-----------|
| RNA-Seq | Trans-ABySS | XLOC_105904 | S1694236:0-197  | cdRNA01-preDia | cdRNA05-postDia | 24.0216 | 768.97  | 5.00052  | 5.00E-05 | 0.0195319 |
| RNA-Seq | Trans-ABySS | XLOC_105947 | S1694482:0-1080 | cdRNA01-preDia | cdRNA05-postDia | 29.4173 | 187.33  | 2.67085  | 5.00E-05 | 0.0195319 |
| RNA-Seq | Trans-ABySS | XLOC_106017 | S1694812:0-281  | cdRNA01-preDia | cdRNA04-Dia-R3  | 292.888 | 48.1666 | -2.60424 | 5.00E-05 | 0.0195319 |
| RNA-Seq | Trans-ABySS | XLOC_106017 | S1694812:0-281  | cdRNA01-preDia | cdRNA03-Dia-R2  | 292.888 | 58.3613 | -2.32726 | 0.0001   | 0.0354705 |
| RNA-Seq | Trans-ABySS | XLOC_106078 | S1695212:0-602  | cdRNA01-preDia | cdRNA05-postDia | 50.5366 | 10.6948 | -2.24042 | 0.0001   | 0.0354705 |
| RNA-Seq | Trans-ABySS | XLOC_106094 | S1695297:0-445  | cdRNA04-Dia-R3 | cdRNA05-postDia | 22.8499 | 109.833 | 2.26505  | 0.0002   | 0.0481888 |
| RNA-Seq | Trans-ABySS | XLOC_106094 | S1695297:0-445  | cdRNA03-Dia-R2 | cdRNA05-postDia | 19.4341 | 109.833 | 2.49865  | 5.00E-05 | 0.0195319 |
| RNA-Seq | Trans-ABySS | XLOC_106102 | S1695328:0-1150 | cdRNA01-preDia | cdRNA05-postDia | 8.87127 | 84.0861 | 3.24466  | 5.00E-05 | 0.0195319 |
| RNA-Seq | Trans-ABySS | XLOC_106102 | S1695328:0-1150 | cdRNA01-preDia | cdRNA04-Dia-R3  | 8.87127 | 87.0504 | 3.29464  | 5.00E-05 | 0.0195319 |
| RNA-Seq | Trans-ABySS | XLOC_106102 | S1695328:0-1150 | cdRNA01-preDia | cdRNA03-Dia-R2  | 8.87127 | 90.8659 | 3.35653  | 5.00E-05 | 0.0195319 |
| RNA-Seq | Trans-ABySS | XLOC_106252 | S1696219:0-682  | cdRNA01-preDia | cdRNA03-Dia-R2  | 15.8392 | 105.639 | 2.73757  | 5.00E-05 | 0.0195319 |
| RNA-Seq | Trans-ABySS | XLOC_106252 | S1696219:0-682  | cdRNA01-preDia | cdRNA04-Dia-R3  | 15.8392 | 111.726 | 2.81839  | 5.00E-05 | 0.0195319 |
| RNA-Seq | Trans-ABySS | XLOC_106545 | S1697919:0-1463 | cdRNA01-preDia | cdRNA03-Dia-R2  | 161.102 | 32.4904 | -2.30989 | 0.0002   | 0.0481888 |
| RNA-Seq | Trans-ABySS | XLOC_106582 | S1698217:0-980  | cdRNA03-Dia-R2 | cdRNA05-postDia | 27.19   | 5.25676 | -2.37083 | 0.0002   | 0.0481888 |
| RNA-Seq | Trans-ABySS | XLOC_106582 | S1698217:0-980  | cdRNA04-Dia-R3 | cdRNA05-postDia | 26.0763 | 5.25676 | -2.31049 | 0.0002   | 0.0481888 |
| RNA-Seq | Trans-ABySS | XLOC_106717 | S1698907:0-457  | cdRNA04-Dia-R3 | cdRNA05-postDia | 89.5958 | 13.8447 | -2.6941  | 5.00E-05 | 0.0195319 |
| RNA-Seq | Trans-ABySS | XLOC_106717 | S1698907:0-457  | cdRNA03-Dia-R2 | cdRNA05-postDia | 82.8651 | 13.8447 | -2.58143 | 0.00015  | 0.0374403 |
| RNA-Seq | Trans-ABySS | XLOC_106794 | S1699295:0-592  | cdRNA01-preDia | cdRNA05-postDia | 3.17382 | 36.3396 | 3.51725  | 5.00E-05 | 0.0195319 |
| RNA-Seq | Trans-ABySS | XLOC_106840 | S1699561:0-359  | cdRNA04-Dia-R3 | cdRNA05-postDia | 62.0171 | 10.2605 | -2.59556 | 0.00015  | 0.0374403 |
| RNA-Seq | Trans-ABySS | XLOC_106910 | S1700042:0-4296 | cdRNA03-Dia-R2 | cdRNA05-postDia | 4.66577 | 26.992  | 2.53235  | 0.0001   | 0.0354705 |
| RNA-Seq | Trans-ABySS | XLOC_106910 | S1700042:0-4296 | cdRNA04-Dia-R3 | cdRNA05-postDia | 4.1105  | 26.992  | 2.71515  | 5.00E-05 | 0.0195319 |
| RNA-Seq | Trans-ABySS | XLOC_106942 | S1700233:0-1961 | cdRNA04-Dia-R3 | cdRNA05-postDia | 84.5066 | 14.0313 | -2.59041 | 0.0001   | 0.0354705 |
| RNA-Seq | Trans-ABySS | XLOC_106956 | S1700298:0-454  | cdRNA01-preDia | cdRNA04-Dia-R3  | 23.1689 | 127.212 | 2.45698  | 5.00E-05 | 0.0195319 |
| RNA-Seq | Trans-ABySS | XLOC_106956 | S1700298:0-454  | cdRNA01-preDia | cdRNA03-Dia-R2  | 23.1689 | 133.461 | 2.52616  | 5.00E-05 | 0.0195319 |
| RNA-Seq | Trans-ABySS | XLOC_107058 | S1700935:0-579  | cdRNA03-Dia-R2 | cdRNA05-postDia | 104.439 | 17.972  | -2.53884 | 5.00E-05 | 0.0195319 |
| RNA-Seq | Trans-ABySS | XLOC_107128 | S1701343:0-460  | cdRNA03-Dia-R2 | cdRNA05-postDia | 20.5606 | 129.377 | 2.65363  | 5.00E-05 | 0.0195319 |
| RNA-Seq | Trans-ABySS | XLOC_107151 | S1701500:0-1075 | cdRNA01-preDia | cdRNA03-Dia-R2  | 87.6588 | 14.4937 | -2.59648 | 0.00015  | 0.0374403 |
| RNA-Seq | Trans-ABySS | XLOC_107179 | S1701667:0-1260 | cdRNA04-Dia-R3 | cdRNA05-postDia | 16.777  | 92.4586 | 2.46232  | 0.00015  | 0.0374403 |
| RNA-Seq | Trans-ABySS | XLOC_107179 | S1701667:0-1260 | cdRNA01-preDia | cdRNA05-postDia | 11.6616 | 92.4586 | 2.98704  | 5.00E-05 | 0.0195319 |
| RNA-Seq | Trans-ABySS | XLOC_107210 | S1701826:0-325  | cdRNA02-Dia-R1 | cdRNA05-postDia | 36.0906 | 398.442 | 3.46468  | 5.00E-05 | 0.0195319 |
| RNA-Seq | Trans-ABySS | XLOC_107210 | S1701826:0-325  | cdRNA04-Dia-R3 | cdRNA05-postDia | 35.4432 | 398.442 | 3.49079  | 5.00E-05 | 0.0195319 |
| RNA-Seq | Trans-ABySS | XLOC_107210 | S1701826:0-325  | cdRNA03-Dia-R2 | cdRNA05-postDia | 31.9518 | 398.442 | 3.6404   | 5.00E-05 | 0.0195319 |
| RNA-Seq | Trans-ABySS | XLOC_107210 | S1701826:0-325  | cdRNA01-preDia | cdRNA05-postDia | 31.1846 | 398.442 | 3.67546  | 5.00E-05 | 0.0195319 |
| RNA-Seq | Trans-ABySS | XLOC_107321 | S1702411:1-218  | cdRNA04-Dia-R3 | cdRNA05-postDia | 60.9496 | 407.298 | 2.7404   | 5.00E-05 | 0.0195319 |
| RNA-Seq | Trans-ABySS | XLOC_107321 | S1702411:1-218  | cdRNA03-Dia-R2 | cdRNA05-postDia | 51.6706 | 407.298 | 2.97867  | 0.0001   | 0.0354705 |
| RNA-Seq | Trans-ABySS | XLOC_107321 | S1702411:1-218  | cdRNA02-Dia-R1 | cdRNA05-postDia | 21.7167 | 407.298 | 4.22921  | 0.00015  | 0.0374403 |
| RNA-Seq | Trans-ABySS | XLOC_107468 | S1703181:0-585  | cdRNA04-Dia-R3 | cdRNA05-postDia | 12.9973 | 67.2647 | 2.37163  | 0.0002   | 0.0481888 |
| RNA-Seq | Trans-ABySS | XLOC_107468 | S1703181:0-585  | cdRNA02-Dia-R1 | cdRNA05-postDia | 12.9599 | 67.2647 | 2.3758   | 0.0002   | 0.0481888 |
| RNA-Seq | Trans-ABySS | XLOC_107468 | S1703181:0-585  | cdRNA03-Dia-R2 | cdRNA05-postDia | 12.5274 | 67.2647 | 2.42476  | 0.00015  | 0.0374403 |
| RNA-Seq | Trans-ABySS | XLOC_107551 | S1703652:0-132  | cdRNA01-preDia | cdRNA05-postDia | 527.407 | 3694.6  | 2.80843  | 5.00E-05 | 0.0195319 |
| RNA-Seq | Trans-ABySS | XLOC_107551 | S1703652:0-132  | cdRNA02-Dia-R1 | cdRNA05-postDia | 456.968 | 3694.6  | 3.01525  | 0.00015  | 0.0374403 |
| RNA-Seq | Trans-ABySS | XLOC_107555 | S1703664:0-1083 | cdRNA02-Dia-R1 | cdRNA05-postDia | 6.15253 | 34.2006 | 2.47477  | 0.0001   | 0.0354705 |
| RNA-Seq | Trans-ABySS | XLOC_107555 | S1703664:0-1083 | cdRNA04-Dia-R3 | cdRNA05-postDia | 3.49682 | 34.2006 | 3.28991  | 5.00E-05 | 0.0195319 |
| RNA-Seq | Trans-ABySS | XLOC_107555 | S1703664:0-1083 | cdRNA03-Dia-R2 | cdRNA05-postDia | 2.68966 | 34.2006 | 3.66853  | 5.00E-05 | 0.0195319 |
| RNA-Seq | Trans-ABySS | XLOC_107990 | S1706240:0-1111 | cdRNA01-preDia | cdRNA03-Dia-R2  | 9.85615 | 82.5759 | 3.06662  | 5.00E-05 | 0.0195319 |
| RNA-Seq | Trans-ABySS | XLOC_107990 | S1706240:0-1111 | cdRNA01-preDia | cdRNA04-Dia-R3  | 9.85615 | 82.6037 | 3.06711  | 5.00E-05 | 0.0195319 |
| RNA-Seq | Trans-ABySS | XLOC_108093 | S1706776:0-544  | cdRNA02-Dia-R1 | cdRNA05-postDia | 17.5852 | 94.2848 | 2.42266  | 0.0001   | 0.0354705 |

|         |             |             |                 |                |                 |         |         |          |          |           |
|---------|-------------|-------------|-----------------|----------------|-----------------|---------|---------|----------|----------|-----------|
| RNA-Seq | Trans-ABySS | XLOC_108124 | S1706995:0-651  | cdRNA01-preDia | cdRNA05-postDia | 9.79526 | 82.7266 | 3.07819  | 5.00E-05 | 0.0195319 |
| RNA-Seq | Trans-ABySS | XLOC_108519 | S1709352:0-384  | cdRNA01-preDia | cdRNA05-postDia | 27.5894 | 291.833 | 3.40296  | 5.00E-05 | 0.0195319 |
| RNA-Seq | Trans-ABySS | XLOC_108519 | S1709352:0-384  | cdRNA04-Dia-R3 | cdRNA05-postDia | 22.5066 | 291.833 | 3.69672  | 5.00E-05 | 0.0195319 |
| RNA-Seq | Trans-ABySS | XLOC_108519 | S1709352:0-384  | cdRNA03-Dia-R2 | cdRNA05-postDia | 22.2797 | 291.833 | 3.71134  | 5.00E-05 | 0.0195319 |
| RNA-Seq | Trans-ABySS | XLOC_108519 | S1709352:0-384  | cdRNA02-Dia-R1 | cdRNA05-postDia | 16.5907 | 291.833 | 4.1367   | 5.00E-05 | 0.0195319 |
| RNA-Seq | Trans-ABySS | XLOC_108561 | S1709570:0-175  | cdRNA04-Dia-R3 | cdRNA05-postDia | 123.051 | 935.533 | 2.92653  | 5.00E-05 | 0.0195319 |
| RNA-Seq | Trans-ABySS | XLOC_108561 | S1709570:0-175  | cdRNA02-Dia-R1 | cdRNA05-postDia | 110.377 | 935.533 | 3.08335  | 5.00E-05 | 0.0195319 |
| RNA-Seq | Trans-ABySS | XLOC_108561 | S1709570:0-175  | cdRNA03-Dia-R2 | cdRNA05-postDia | 74.575  | 935.533 | 3.64902  | 5.00E-05 | 0.0195319 |
| RNA-Seq | Trans-ABySS | XLOC_108591 | S1709750:0-182  | cdRNA01-preDia | cdRNA04-Dia-R3  | 879.391 | 142.87  | -2.6218  | 5.00E-05 | 0.0195319 |
| RNA-Seq | Trans-ABySS | XLOC_108679 | S1710175:0-500  | cdRNA02-Dia-R1 | cdRNA05-postDia | 7.03565 | 54.3745 | 2.95017  | 0.00015  | 0.0374403 |
| RNA-Seq | Trans-ABySS | XLOC_108900 | S1711416:0-240  | cdRNA01-preDia | cdRNA05-postDia | 217.902 | 31.7322 | -2.77966 | 5.00E-05 | 0.0195319 |
| RNA-Seq | Trans-ABySS | XLOC_109017 | S1712062:0-409  | cdRNA01-preDia | cdRNA05-postDia | 18.6844 | 92.5505 | 2.3084   | 0.0002   | 0.0481888 |
| RNA-Seq | Trans-ABySS | XLOC_109079 | S1712353:0-181  | cdRNA01-preDia | cdRNA05-postDia | 320.752 | 2155.62 | 2.74857  | 5.00E-05 | 0.0195319 |
| RNA-Seq | Trans-ABySS | XLOC_109114 | S1712500:0-849  | cdRNA01-preDia | cdRNA03-Dia-R2  | 30.4771 | 225.873 | 2.88971  | 5.00E-05 | 0.0195319 |
| RNA-Seq | Trans-ABySS | XLOC_109114 | S1712500:0-849  | cdRNA01-preDia | cdRNA04-Dia-R3  | 30.4771 | 229.004 | 2.90958  | 5.00E-05 | 0.0195319 |
| RNA-Seq | Trans-ABySS | XLOC_109244 | S1713280:5-550  | cdRNA01-preDia | cdRNA04-Dia-R3  | 289.435 | 19.2791 | -3.90813 | 5.00E-05 | 0.0195319 |
| RNA-Seq | Trans-ABySS | XLOC_109244 | S1713280:5-550  | cdRNA01-preDia | cdRNA03-Dia-R2  | 289.435 | 20.6682 | -3.80776 | 5.00E-05 | 0.0195319 |
| RNA-Seq | Trans-ABySS | XLOC_109244 | S1713280:5-550  | cdRNA01-preDia | cdRNA02-Dia-R1  | 289.435 | 34.3778 | -3.07369 | 5.00E-05 | 0.0195319 |
| RNA-Seq | Trans-ABySS | XLOC_109244 | S1713280:5-550  | cdRNA01-preDia | cdRNA05-postDia | 289.435 | 38.3575 | -2.91566 | 5.00E-05 | 0.0195319 |
| RNA-Seq | Trans-ABySS | XLOC_109276 | S1713448:0-864  | cdRNA01-preDia | cdRNA02-Dia-R1  | 37.7316 | 336.82  | 3.15813  | 5.00E-05 | 0.0195319 |
| RNA-Seq | Trans-ABySS | XLOC_109276 | S1713448:0-864  | cdRNA01-preDia | cdRNA05-postDia | 37.7316 | 636.204 | 4.07565  | 5.00E-05 | 0.0195319 |
| RNA-Seq | Trans-ABySS | XLOC_109339 | S1713801:0-662  | cdRNA01-preDia | cdRNA02-Dia-R1  | 126.869 | 5.20719 | -4.60669 | 5.00E-05 | 0.0195319 |
| RNA-Seq | Trans-ABySS | XLOC_109339 | S1713801:0-662  | cdRNA01-preDia | cdRNA03-Dia-R2  | 126.869 | 14.5119 | -3.12803 | 5.00E-05 | 0.0195319 |
| RNA-Seq | Trans-ABySS | XLOC_109339 | S1713801:0-662  | cdRNA01-preDia | cdRNA04-Dia-R3  | 126.869 | 16.2184 | -2.96764 | 5.00E-05 | 0.0195319 |
| RNA-Seq | Trans-ABySS | XLOC_109830 | S1716413:0-770  | cdRNA02-Dia-R1 | cdRNA05-postDia | 3.62015 | 22.8747 | 2.65963  | 0.0002   | 0.0481888 |
| RNA-Seq | Trans-ABySS | XLOC_109932 | S1716961:6-469  | cdRNA01-preDia | cdRNA04-Dia-R3  | 14.968  | 97.5744 | 2.70463  | 5.00E-05 | 0.0195319 |
| RNA-Seq | Trans-ABySS | XLOC_109932 | S1716961:6-469  | cdRNA01-preDia | cdRNA03-Dia-R2  | 14.968  | 98.6846 | 2.72095  | 5.00E-05 | 0.0195319 |
| RNA-Seq | Trans-ABySS | XLOC_109963 | S1717128:0-1245 | cdRNA01-preDia | cdRNA05-postDia | 9.85805 | 61.5901 | 2.64332  | 0.0001   | 0.0354705 |
| RNA-Seq | Trans-ABySS | XLOC_110054 | S1717706:0-431  | cdRNA01-preDia | cdRNA05-postDia | 5.62559 | 161.138 | 4.84015  | 5.00E-05 | 0.0195319 |
| RNA-Seq | Trans-ABySS | XLOC_110238 | S1718818:0-156  | cdRNA02-Dia-R1 | cdRNA05-postDia | 145.893 | 1151.55 | 2.98059  | 5.00E-05 | 0.0195319 |
| RNA-Seq | Trans-ABySS | XLOC_110238 | S1718818:0-156  | cdRNA04-Dia-R3 | cdRNA05-postDia | 98.3843 | 1151.55 | 3.54901  | 5.00E-05 | 0.0195319 |
| RNA-Seq | Trans-ABySS | XLOC_110238 | S1718818:0-156  | cdRNA03-Dia-R2 | cdRNA05-postDia | 94.8952 | 1151.55 | 3.6011   | 5.00E-05 | 0.0195319 |
| RNA-Seq | Trans-ABySS | XLOC_110270 | S1719031:0-325  | cdRNA02-Dia-R1 | cdRNA05-postDia | 12.3036 | 151.22  | 3.6195   | 5.00E-05 | 0.0195319 |
| RNA-Seq | Trans-ABySS | XLOC_110270 | S1719031:0-325  | cdRNA04-Dia-R3 | cdRNA05-postDia | 11.8144 | 151.22  | 3.67803  | 5.00E-05 | 0.0195319 |
| RNA-Seq | Trans-ABySS | XLOC_110270 | S1719031:0-325  | cdRNA03-Dia-R2 | cdRNA05-postDia | 7.98796 | 151.22  | 4.24268  | 0.0001   | 0.0354705 |
| RNA-Seq | Trans-ABySS | XLOC_110454 | S1720116:0-2048 | cdRNA01-preDia | cdRNA03-Dia-R2  | 212.716 | 16.1353 | -3.72063 | 5.00E-05 | 0.0195319 |
| RNA-Seq | Trans-ABySS | XLOC_110454 | S1720116:0-2048 | cdRNA01-preDia | cdRNA04-Dia-R3  | 212.716 | 16.1826 | -3.71641 | 5.00E-05 | 0.0195319 |
| RNA-Seq | Trans-ABySS | XLOC_110541 | S1720621:0-1044 | cdRNA02-Dia-R1 | cdRNA03-Dia-R2  | 17.1152 | 3.02695 | -2.49934 | 5.00E-05 | 0.0195319 |
| RNA-Seq | Trans-ABySS | XLOC_110541 | S1720621:0-1044 | cdRNA02-Dia-R1 | cdRNA05-postDia | 17.1152 | 112.116 | 2.71165  | 5.00E-05 | 0.0195319 |
| RNA-Seq | Trans-ABySS | XLOC_110541 | S1720621:0-1044 | cdRNA01-preDia | cdRNA05-postDia | 4.1266  | 112.116 | 4.76389  | 5.00E-05 | 0.0195319 |
| RNA-Seq | Trans-ABySS | XLOC_110541 | S1720621:0-1044 | cdRNA04-Dia-R3 | cdRNA05-postDia | 3.25259 | 112.116 | 5.10726  | 5.00E-05 | 0.0195319 |
| RNA-Seq | Trans-ABySS | XLOC_110541 | S1720621:0-1044 | cdRNA03-Dia-R2 | cdRNA05-postDia | 3.02695 | 112.116 | 5.21098  | 5.00E-05 | 0.0195319 |
| RNA-Seq | Trans-ABySS | XLOC_110584 | S1720908:0-595  | cdRNA02-Dia-R1 | cdRNA05-postDia | 12.7143 | 68.266  | 2.42471  | 0.0001   | 0.0354705 |
| RNA-Seq | Trans-ABySS | XLOC_110588 | S1720914:0-448  | cdRNA02-Dia-R1 | cdRNA05-postDia | 22.9893 | 185.347 | 3.01119  | 5.00E-05 | 0.0195319 |
| RNA-Seq | Trans-ABySS | XLOC_110588 | S1720914:0-448  | cdRNA03-Dia-R2 | cdRNA05-postDia | 12.7968 | 185.347 | 3.85638  | 5.00E-05 | 0.0195319 |
| RNA-Seq | Trans-ABySS | XLOC_110588 | S1720914:0-448  | cdRNA04-Dia-R3 | cdRNA05-postDia | 9.7974  | 185.347 | 4.24169  | 5.00E-05 | 0.0195319 |
| RNA-Seq | Trans-ABySS | XLOC_110682 | S1721434:0-709  | cdRNA01-preDia | cdRNA05-postDia | 3.34167 | 38.3688 | 3.52129  | 5.00E-05 | 0.0195319 |



|         |             |             |                 |                |                 |         |         |          |          |           |
|---------|-------------|-------------|-----------------|----------------|-----------------|---------|---------|----------|----------|-----------|
| RNA-Seq | Trans-ABySS | XLOC_110768 | S1721917:5-809  | cdRNA02-Dia-R1 | cdRNA05-postDia | 31.239  | 355.824 | 3.50974  | 5.00E-05 | 0.0195319 |
| RNA-Seq | Trans-ABySS | XLOC_110768 | S1721917:5-809  | cdRNA03-Dia-R2 | cdRNA05-postDia | 15.0922 | 355.824 | 4.55929  | 5.00E-05 | 0.0195319 |
| RNA-Seq | Trans-ABySS | XLOC_110768 | S1721917:5-809  | cdRNA04-Dia-R3 | cdRNA05-postDia | 15.0838 | 355.824 | 4.56009  | 5.00E-05 | 0.0195319 |
| RNA-Seq | Trans-ABySS | XLOC_110768 | S1721917:5-809  | cdRNA01-preDia | cdRNA05-postDia | 12.5426 | 355.824 | 4.82625  | 5.00E-05 | 0.0195319 |
| RNA-Seq | Trans-ABySS | XLOC_110843 | S1722329:0-419  | cdRNA04-Dia-R3 | cdRNA05-postDia | 10.3239 | 64.5428 | 2.64427  | 0.00015  | 0.0374403 |
| RNA-Seq | Trans-ABySS | XLOC_110843 | S1722329:0-419  | cdRNA03-Dia-R2 | cdRNA05-postDia | 8.09068 | 64.5428 | 2.99592  | 5.00E-05 | 0.0195319 |
| RNA-Seq | Trans-ABySS | XLOC_110879 | S1722504:0-1973 | cdRNA01-preDia | cdRNA04-Dia-R3  | 10.0296 | 57.7253 | 2.52494  | 0.0001   | 0.0354705 |
| RNA-Seq | Trans-ABySS | XLOC_110879 | S1722504:0-1973 | cdRNA01-preDia | cdRNA03-Dia-R2  | 10.0296 | 58.8554 | 2.55291  | 5.00E-05 | 0.0195319 |
| RNA-Seq | Trans-ABySS | XLOC_110946 | S1722870:0-1238 | cdRNA01-preDia | cdRNA04-Dia-R3  | 13.0125 | 59.907  | 2.20282  | 0.00015  | 0.0374403 |
| RNA-Seq | Trans-ABySS | XLOC_111077 | S1723669:0-2780 | cdRNA04-Dia-R3 | cdRNA05-postDia | 141.363 | 23.3405 | -2.5985  | 0.0001   | 0.0354705 |
| RNA-Seq | Trans-ABySS | XLOC_111077 | S1723669:0-2780 | cdRNA03-Dia-R2 | cdRNA05-postDia | 139.227 | 23.3405 | -2.57653 | 0.0002   | 0.0481888 |
| RNA-Seq | Trans-ABySS | XLOC_111135 | S1724022:0-127  | cdRNA02-Dia-R1 | cdRNA05-postDia | 213.509 | 1770.26 | 3.0516   | 0.0002   | 0.0481888 |
| RNA-Seq | Trans-ABySS | XLOC_111219 | S1724511:1-310  | cdRNA02-Dia-R1 | cdRNA05-postDia | 38.2573 | 222.938 | 2.54284  | 5.00E-05 | 0.0195319 |
| RNA-Seq | Trans-ABySS | XLOC_111373 | S1725431:1-928  | cdRNA01-preDia | cdRNA05-postDia | 3.78504 | 19.9313 | 2.39666  | 0.00015  | 0.0374403 |
| RNA-Seq | Trans-ABySS | XLOC_111476 | S1726059:0-980  | cdRNA02-Dia-R1 | cdRNA05-postDia | 5.23768 | 24.2839 | 2.213    | 0.00015  | 0.0374403 |
| RNA-Seq | Trans-ABySS | XLOC_111476 | S1726059:0-980  | cdRNA03-Dia-R2 | cdRNA05-postDia | 5.17356 | 24.2839 | 2.23077  | 0.00015  | 0.0374403 |
| RNA-Seq | Trans-ABySS | XLOC_111536 | S1726428:0-409  | cdRNA04-Dia-R3 | cdRNA05-postDia | 14.7819 | 79.5762 | 2.4285   | 0.0001   | 0.0354705 |
| RNA-Seq | Trans-ABySS | XLOC_111557 | S1726557:0-717  | cdRNA01-preDia | cdRNA03-Dia-R2  | 16.0033 | 104.344 | 2.70491  | 5.00E-05 | 0.0195319 |
| RNA-Seq | Trans-ABySS | XLOC_111557 | S1726557:0-717  | cdRNA01-preDia | cdRNA04-Dia-R3  | 16.0033 | 105.851 | 2.72559  | 5.00E-05 | 0.0195319 |
| RNA-Seq | Trans-ABySS | XLOC_111573 | S1726671:0-581  | cdRNA01-preDia | cdRNA03-Dia-R2  | 19.2356 | 90.3969 | 2.23249  | 0.0002   | 0.0481888 |
| RNA-Seq | Trans-ABySS | XLOC_111679 | S1727320:0-543  | cdRNA01-preDia | cdRNA05-postDia | 54.892  | 7.58596 | -2.85519 | 5.00E-05 | 0.0195319 |
| RNA-Seq | Trans-ABySS | XLOC_111734 | S1727627:0-230  | cdRNA02-Dia-R1 | cdRNA05-postDia | 104.385 | 1732.2  | 4.05262  | 5.00E-05 | 0.0195319 |
| RNA-Seq | Trans-ABySS | XLOC_111734 | S1727627:0-230  | cdRNA01-preDia | cdRNA05-postDia | 33.4092 | 1732.2  | 5.69622  | 5.00E-05 | 0.0195319 |
| RNA-Seq | Trans-ABySS | XLOC_111734 | S1727627:0-230  | cdRNA03-Dia-R2 | cdRNA05-postDia | 30.6948 | 1732.2  | 5.81847  | 5.00E-05 | 0.0195319 |
| RNA-Seq | Trans-ABySS | XLOC_111734 | S1727627:0-230  | cdRNA04-Dia-R3 | cdRNA05-postDia | 25.5851 | 1732.2  | 6.08116  | 5.00E-05 | 0.0195319 |
| RNA-Seq | Trans-ABySS | XLOC_111855 | S1728259:0-509  | cdRNA02-Dia-R1 | cdRNA05-postDia | 15.308  | 83.4435 | 2.44651  | 5.00E-05 | 0.0195319 |
| RNA-Seq | Trans-ABySS | XLOC_111923 | S1728693:0-1227 | cdRNA03-Dia-R2 | cdRNA05-postDia | 8.85179 | 52.7483 | 2.57508  | 5.00E-05 | 0.0195319 |
| RNA-Seq | Trans-ABySS | XLOC_111923 | S1728693:0-1227 | cdRNA04-Dia-R3 | cdRNA05-postDia | 8.38785 | 52.7483 | 2.65275  | 0.0001   | 0.0354705 |
| RNA-Seq | Trans-ABySS | XLOC_112109 | S1729769:0-859  | cdRNA04-Dia-R3 | cdRNA05-postDia | 5.27923 | 37.0962 | 2.81287  | 5.00E-05 | 0.0195319 |
| RNA-Seq | Trans-ABySS | XLOC_112438 | S1731519:10-375 | cdRNA03-Dia-R2 | cdRNA05-postDia | 124.057 | 23.344  | -2.40988 | 0.0002   | 0.0481888 |
| RNA-Seq | Trans-ABySS | XLOC_112438 | S1731519:10-375 | cdRNA04-Dia-R3 | cdRNA05-postDia | 121.897 | 23.344  | -2.38454 | 0.0002   | 0.0481888 |
| RNA-Seq | Trans-ABySS | XLOC_112567 | S1732232:0-186  | cdRNA01-preDia | cdRNA04-Dia-R3  | 105.296 | 652.443 | 2.6314   | 0.00015  | 0.0374403 |
| RNA-Seq | Trans-ABySS | XLOC_112567 | S1732232:0-186  | cdRNA01-preDia | cdRNA03-Dia-R2  | 105.296 | 694.105 | 2.7207   | 5.00E-05 | 0.0195319 |
| RNA-Seq | Trans-ABySS | XLOC_112597 | S1732410:0-265  | cdRNA02-Dia-R1 | cdRNA05-postDia | 75.5766 | 357.374 | 2.24142  | 0.0001   | 0.0354705 |
| RNA-Seq | Trans-ABySS | XLOC_112597 | S1732410:0-265  | cdRNA04-Dia-R3 | cdRNA05-postDia | 58.9678 | 357.374 | 2.59944  | 5.00E-05 | 0.0195319 |
| RNA-Seq | Trans-ABySS | XLOC_112597 | S1732410:0-265  | cdRNA03-Dia-R2 | cdRNA05-postDia | 45.1006 | 357.374 | 2.98622  | 5.00E-05 | 0.0195319 |
| RNA-Seq | Trans-ABySS | XLOC_112699 | S1732930:0-300  | cdRNA03-Dia-R2 | cdRNA05-postDia | 30.8246 | 169.183 | 2.45643  | 0.0002   | 0.0481888 |
| RNA-Seq | Trans-ABySS | XLOC_112699 | S1732930:0-300  | cdRNA01-preDia | cdRNA05-postDia | 19.6411 | 169.183 | 3.10664  | 5.00E-05 | 0.0195319 |
| RNA-Seq | Trans-ABySS | XLOC_112749 | S1733205:0-1092 | cdRNA04-Dia-R3 | cdRNA05-postDia | 77.9771 | 12.6828 | -2.62018 | 5.00E-05 | 0.0195319 |
| RNA-Seq | Trans-ABySS | XLOC_112749 | S1733205:0-1092 | cdRNA03-Dia-R2 | cdRNA05-postDia | 76.3053 | 12.6828 | -2.58892 | 0.0001   | 0.0354705 |
| RNA-Seq | Trans-ABySS | XLOC_112913 | S1734056:0-650  | cdRNA02-Dia-R1 | cdRNA05-postDia | 7.30545 | 43.7426 | 2.58199  | 0.0001   | 0.0354705 |
| RNA-Seq | Trans-ABySS | XLOC_112934 | S1734191:0-463  | cdRNA04-Dia-R3 | cdRNA05-postDia | 92.1353 | 15.0647 | -2.61258 | 0.0001   | 0.0354705 |
| RNA-Seq | Trans-ABySS | XLOC_113006 | S1734642:0-1168 | cdRNA03-Dia-R2 | cdRNA05-postDia | 110.433 | 14.523  | -2.92676 | 5.00E-05 | 0.0195319 |
| RNA-Seq | Trans-ABySS | XLOC_113006 | S1734642:0-1168 | cdRNA04-Dia-R3 | cdRNA05-postDia | 105.883 | 14.523  | -2.86606 | 5.00E-05 | 0.0195319 |
| RNA-Seq | Trans-ABySS | XLOC_113053 | S1734929:0-222  | cdRNA02-Dia-R1 | cdRNA05-postDia | 55.3224 | 1000.23 | 4.17633  | 5.00E-05 | 0.0195319 |
| RNA-Seq | Trans-ABySS | XLOC_113053 | S1734929:0-222  | cdRNA01-preDia | cdRNA05-postDia | 26.1774 | 1000.23 | 5.25587  | 5.00E-05 | 0.0195319 |
| RNA-Seq | Trans-ABySS | XLOC_113053 | S1734929:0-222  | cdRNA03-Dia-R2 | cdRNA05-postDia | 14.4709 | 1000.23 | 6.11104  | 0.0001   | 0.0354705 |

|         |             |             |                 |                |                 |         |         |          |          |           |
|---------|-------------|-------------|-----------------|----------------|-----------------|---------|---------|----------|----------|-----------|
| RNA-Seq | Trans-ABySS | XLOC_113053 | S1734929:0-222  | cdRNA04-Dia-R3 | cdRNA05-postDia | 13.8488 | 1000.23 | 6.17443  | 0.0002   | 0.0481888 |
| RNA-Seq | Trans-ABySS | XLOC_113093 | S1735220:0-189  | cdRNA01-preDia | cdRNA03-Dia-R2  | 868.876 | 161.401 | -2.4285  | 0.0001   | 0.0354705 |
| RNA-Seq | Trans-ABySS | XLOC_113115 | S1735338:0-290  | cdRNA03-Dia-R2 | cdRNA05-postDia | 651.765 | 141.747 | -2.20103 | 0.0002   | 0.0481888 |
| RNA-Seq | Trans-ABySS | XLOC_113329 | S1736503:0-238  | cdRNA02-Dia-R1 | cdRNA05-postDia | 146.151 | 802.513 | 2.45707  | 0.00015  | 0.0374403 |
| RNA-Seq | Trans-ABySS | XLOC_113565 | S1737967:0-1380 | cdRNA04-Dia-R3 | cdRNA05-postDia | 63.346  | 11.4243 | -2.47115 | 0.0002   | 0.0481888 |
| RNA-Seq | Trans-ABySS | XLOC_113565 | S1737967:0-1380 | cdRNA03-Dia-R2 | cdRNA05-postDia | 61.1841 | 11.4243 | -2.42105 | 0.00015  | 0.0374403 |
| RNA-Seq | Trans-ABySS | XLOC_113699 | S1738752:0-946  | cdRNA03-Dia-R2 | cdRNA05-postDia | 36.0107 | 401.207 | 3.47785  | 5.00E-05 | 0.0195319 |
| RNA-Seq | Trans-ABySS | XLOC_113699 | S1738752:0-946  | cdRNA04-Dia-R3 | cdRNA05-postDia | 33.1971 | 401.207 | 3.59522  | 5.00E-05 | 0.0195319 |
| RNA-Seq | Trans-ABySS | XLOC_113704 | S1738799:0-542  | cdRNA03-Dia-R2 | cdRNA05-postDia | 62.6869 | 4.32892 | -3.85608 | 5.00E-05 | 0.0195319 |
| RNA-Seq | Trans-ABySS | XLOC_113704 | S1738799:0-542  | cdRNA04-Dia-R3 | cdRNA05-postDia | 45.5942 | 4.32892 | -3.39677 | 5.00E-05 | 0.0195319 |
| RNA-Seq | Trans-ABySS | XLOC_113704 | S1738799:0-542  | cdRNA01-preDia | cdRNA03-Dia-R2  | 8.63598 | 62.6869 | 2.85973  | 0.0002   | 0.0481888 |
| RNA-Seq | Trans-ABySS | XLOC_113733 | S1738954:0-297  | cdRNA04-Dia-R3 | cdRNA05-postDia | 23.7219 | 129.58  | 2.44955  | 0.0001   | 0.0354705 |
| RNA-Seq | Trans-ABySS | XLOC_113804 | S1739405:0-1637 | cdRNA04-Dia-R3 | cdRNA05-postDia | 9.80125 | 57.119  | 2.54293  | 0.0002   | 0.0481888 |
| RNA-Seq | Trans-ABySS | XLOC_113804 | S1739405:0-1637 | cdRNA03-Dia-R2 | cdRNA05-postDia | 9.55662 | 57.119  | 2.5794   | 5.00E-05 | 0.0195319 |
| RNA-Seq | Trans-ABySS | XLOC_113845 | S1739687:4-207  | cdRNA02-Dia-R1 | cdRNA05-postDia | 44.364  | 310.822 | 2.80863  | 0.00015  | 0.0374403 |
| RNA-Seq | Trans-ABySS | XLOC_113845 | S1739687:4-207  | cdRNA01-preDia | cdRNA05-postDia | 38.6143 | 310.822 | 3.00888  | 0.0001   | 0.0354705 |
| RNA-Seq | Trans-ABySS | XLOC_114018 | S1740943:0-247  | cdRNA04-Dia-R3 | cdRNA05-postDia | 707.929 | 104.145 | -2.76501 | 5.00E-05 | 0.0195319 |
| RNA-Seq | Trans-ABySS | XLOC_114018 | S1740943:0-247  | cdRNA03-Dia-R2 | cdRNA05-postDia | 631.011 | 104.145 | -2.59907 | 5.00E-05 | 0.0195319 |
| RNA-Seq | Trans-ABySS | XLOC_114018 | S1740943:0-247  | cdRNA01-preDia | cdRNA05-postDia | 546.114 | 104.145 | -2.39061 | 0.0001   | 0.0354705 |
| RNA-Seq | Trans-ABySS | XLOC_114105 | S1741579:0-576  | cdRNA01-preDia | cdRNA05-postDia | 6.25284 | 54.2316 | 3.11655  | 5.00E-05 | 0.0195319 |
| RNA-Seq | Trans-ABySS | XLOC_114107 | S1741600:0-316  | cdRNA01-preDia | cdRNA05-postDia | 6.37664 | 83.2999 | 3.70745  | 0.0002   | 0.0481888 |
| RNA-Seq | Trans-ABySS | XLOC_114314 | S1743035:0-372  | cdRNA02-Dia-R1 | cdRNA05-postDia | 37.714  | 694.851 | 4.20353  | 5.00E-05 | 0.0195319 |
| RNA-Seq | Trans-ABySS | XLOC_114314 | S1743035:0-372  | cdRNA01-preDia | cdRNA05-postDia | 20.05   | 694.851 | 5.11503  | 5.00E-05 | 0.0195319 |
| RNA-Seq | Trans-ABySS | XLOC_114314 | S1743035:0-372  | cdRNA03-Dia-R2 | cdRNA05-postDia | 14.3096 | 694.851 | 5.60165  | 5.00E-05 | 0.0195319 |
| RNA-Seq | Trans-ABySS | XLOC_114314 | S1743035:0-372  | cdRNA04-Dia-R3 | cdRNA05-postDia | 14.2017 | 694.851 | 5.61256  | 5.00E-05 | 0.0195319 |
| RNA-Seq | Trans-ABySS | XLOC_114870 | S177058:0-818   | cdRNA01-preDia | cdRNA05-postDia | 9.13676 | 54.5216 | 2.57707  | 5.00E-05 | 0.0195319 |
| RNA-Seq | Trans-ABySS | XLOC_114949 | S177832:0-578   | cdRNA03-Dia-R2 | cdRNA05-postDia | 10.615  | 72.1988 | 2.76587  | 5.00E-05 | 0.0195319 |
| RNA-Seq | Trans-ABySS | XLOC_114949 | S177832:0-578   | cdRNA04-Dia-R3 | cdRNA05-postDia | 10.2729 | 72.1988 | 2.81314  | 5.00E-05 | 0.0195319 |
| RNA-Seq | Trans-ABySS | XLOC_115118 | S179416:0-512   | cdRNA01-preDia | cdRNA05-postDia | 4.88663 | 67.2275 | 3.78214  | 5.00E-05 | 0.0195319 |
| RNA-Seq | Trans-ABySS | XLOC_115118 | S179416:0-512   | cdRNA04-Dia-R3 | cdRNA05-postDia | 4.71244 | 67.2275 | 3.83451  | 5.00E-05 | 0.0195319 |
| RNA-Seq | Trans-ABySS | XLOC_115118 | S179416:0-512   | cdRNA02-Dia-R1 | cdRNA05-postDia | 3.70794 | 67.2275 | 4.18036  | 5.00E-05 | 0.0195319 |
| RNA-Seq | Trans-ABySS | XLOC_115118 | S179416:0-512   | cdRNA03-Dia-R2 | cdRNA05-postDia | 2.89653 | 67.2275 | 4.53666  | 0.00015  | 0.0374403 |
| RNA-Seq | Trans-ABySS | XLOC_115276 | S181074:11-491  | cdRNA04-Dia-R3 | cdRNA05-postDia | 14.539  | 73.7365 | 2.34245  | 5.00E-05 | 0.0195319 |
| RNA-Seq | Trans-ABySS | XLOC_115276 | S181074:11-491  | cdRNA03-Dia-R2 | cdRNA05-postDia | 12.9294 | 73.7365 | 2.51173  | 5.00E-05 | 0.0195319 |
| RNA-Seq | Trans-ABySS | XLOC_116660 | S193976:0-524   | cdRNA04-Dia-R3 | cdRNA05-postDia | 23.4791 | 121.515 | 2.37169  | 0.0002   | 0.0481888 |
| RNA-Seq | Trans-ABySS | XLOC_121307 | S235884:0-307   | cdRNA04-Dia-R3 | cdRNA05-postDia | 28.9503 | 207.559 | 2.84187  | 5.00E-05 | 0.0195319 |
| RNA-Seq | Trans-ABySS | XLOC_121307 | S235884:0-307   | cdRNA03-Dia-R2 | cdRNA05-postDia | 28.1499 | 207.559 | 2.88232  | 5.00E-05 | 0.0195319 |
| RNA-Seq | Trans-ABySS | XLOC_121783 | S240427:0-330   | cdRNA01-preDia | cdRNA03-Dia-R2  | 290.996 | 20.2788 | -3.84296 | 5.00E-05 | 0.0195319 |
| RNA-Seq | Trans-ABySS | XLOC_121783 | S240427:0-330   | cdRNA01-preDia | cdRNA04-Dia-R3  | 290.996 | 22.7532 | -3.67686 | 5.00E-05 | 0.0195319 |
| RNA-Seq | Trans-ABySS | XLOC_121783 | S240427:0-330   | cdRNA01-preDia | cdRNA02-Dia-R1  | 290.996 | 51.3399 | -2.50285 | 0.00015  | 0.0374403 |
| RNA-Seq | Trans-ABySS | XLOC_121783 | S240427:0-330   | cdRNA04-Dia-R3 | cdRNA05-postDia | 22.7532 | 119.899 | 2.39768  | 0.0002   | 0.0481888 |
| RNA-Seq | Trans-ABySS | XLOC_122075 | S242614:0-462   | cdRNA02-Dia-R1 | cdRNA05-postDia | 4.29631 | 44.51   | 3.37296  | 0.0001   | 0.0354705 |
| RNA-Seq | Trans-ABySS | XLOC_122572 | S247007:0-604   | cdRNA03-Dia-R2 | cdRNA05-postDia | 10.7057 | 57.5297 | 2.42593  | 0.00015  | 0.0374403 |
| RNA-Seq | Trans-ABySS | XLOC_122764 | S248512:0-717   | cdRNA01-preDia | cdRNA04-Dia-R3  | 18.7594 | 3.16221 | -2.56861 | 0.0002   | 0.0481888 |
| RNA-Seq | Trans-ABySS | XLOC_122764 | S248512:0-717   | cdRNA03-Dia-R2 | cdRNA05-postDia | 3.5651  | 22.7314 | 2.67267  | 0.00015  | 0.0374403 |
| RNA-Seq | Trans-ABySS | XLOC_122764 | S248512:0-717   | cdRNA04-Dia-R3 | cdRNA05-postDia | 3.16221 | 22.7314 | 2.84568  | 0.00015  | 0.0374403 |
| RNA-Seq | Trans-ABySS | XLOC_123302 | S253202:0-683   | cdRNA04-Dia-R3 | cdRNA05-postDia | 9.09052 | 50.9113 | 2.48555  | 0.0001   | 0.0354705 |

|         |             |             |               |                |                 |         |         |          |          |           |
|---------|-------------|-------------|---------------|----------------|-----------------|---------|---------|----------|----------|-----------|
| RNA-Seq | Trans-ABySS | XLOC_123302 | S253202:0-683 | cdRNA03-Dia-R2 | cdRNA05-postDia | 7.6363  | 50.9113 | 2.73704  | 5.00E-05 | 0.0195319 |
| RNA-Seq | Trans-ABySS | XLOC_123532 | S255233:0-286 | cdRNA04-Dia-R3 | cdRNA05-postDia | 19.5    | 121.014 | 2.63363  | 0.0002   | 0.0481888 |
| RNA-Seq | Trans-ABySS | XLOC_125982 | S277097:0-888 | cdRNA03-Dia-R2 | cdRNA05-postDia | 6.2607  | 32.8657 | 2.39219  | 0.00015  | 0.0374403 |
| RNA-Seq | Trans-ABySS | XLOC_125982 | S277097:0-888 | cdRNA04-Dia-R3 | cdRNA05-postDia | 5.67954 | 32.8657 | 2.53274  | 5.00E-05 | 0.0195319 |
| RNA-Seq | Trans-ABySS | XLOC_126333 | S279979:0-608 | cdRNA01-preDia | cdRNA04-Dia-R3  | 32.0618 | 157.867 | 2.29978  | 0.0002   | 0.0481888 |
| RNA-Seq | Trans-ABySS | XLOC_126873 | S28492:0-642  | cdRNA03-Dia-R2 | cdRNA05-postDia | 5.60134 | 36.9492 | 2.7217   | 5.00E-05 | 0.0195319 |
| RNA-Seq | Trans-ABySS | XLOC_127574 | S291555:0-142 | cdRNA01-preDia | cdRNA05-postDia | 145.273 | 1434.87 | 3.30408  | 5.00E-05 | 0.0195319 |
| RNA-Seq | Trans-ABySS | XLOC_128190 | S297163:0-341 | cdRNA02-Dia-R1 | cdRNA05-postDia | 17.5129 | 89.2581 | 2.34956  | 0.00015  | 0.0374403 |
| RNA-Seq | Trans-ABySS | XLOC_128190 | S297163:0-341 | cdRNA03-Dia-R2 | cdRNA05-postDia | 12.5975 | 89.2581 | 2.82484  | 5.00E-05 | 0.0195319 |
| RNA-Seq | Trans-ABySS | XLOC_128190 | S297163:0-341 | cdRNA01-preDia | cdRNA05-postDia | 12.5502 | 89.2581 | 2.83027  | 0.0001   | 0.0354705 |
| RNA-Seq | Trans-ABySS | XLOC_129417 | S307464:0-234 | cdRNA02-Dia-R1 | cdRNA05-postDia | 17.6217 | 218.651 | 3.63321  | 0.0002   | 0.0481888 |
| RNA-Seq | Trans-ABySS | XLOC_129750 | S310569:0-100 | cdRNA02-Dia-R1 | cdRNA05-postDia | 976.599 | 6372.62 | 2.70605  | 5.00E-05 | 0.0195319 |
| RNA-Seq | Trans-ABySS | XLOC_129750 | S310569:0-100 | cdRNA01-preDia | cdRNA05-postDia | 750.591 | 6372.62 | 3.08579  | 5.00E-05 | 0.0195319 |
| RNA-Seq | Trans-ABySS | XLOC_130700 | S319248:2-186 | cdRNA02-Dia-R1 | cdRNA05-postDia | 80.6347 | 1100.57 | 3.77071  | 5.00E-05 | 0.0195319 |
| RNA-Seq | Trans-ABySS | XLOC_130700 | S319248:2-186 | cdRNA04-Dia-R3 | cdRNA05-postDia | 79.9336 | 1100.57 | 3.78331  | 5.00E-05 | 0.0195319 |
| RNA-Seq | Trans-ABySS | XLOC_130700 | S319248:2-186 | cdRNA03-Dia-R2 | cdRNA05-postDia | 49.2576 | 1100.57 | 4.48176  | 5.00E-05 | 0.0195319 |
| RNA-Seq | Trans-ABySS | XLOC_130700 | S319248:2-186 | cdRNA01-preDia | cdRNA05-postDia | 39.4155 | 1100.57 | 4.80335  | 5.00E-05 | 0.0195319 |
| RNA-Seq | Trans-ABySS | XLOC_130800 | S320040:0-289 | cdRNA02-Dia-R1 | cdRNA05-postDia | 26.4525 | 159.834 | 2.59509  | 0.00015  | 0.0374403 |
| RNA-Seq | Trans-ABySS | XLOC_130911 | S321116:0-488 | cdRNA04-Dia-R3 | cdRNA05-postDia | 5.86222 | 35.5956 | 2.60218  | 0.00015  | 0.0374403 |
| RNA-Seq | Trans-ABySS | XLOC_130928 | S321298:0-612 | cdRNA03-Dia-R2 | cdRNA05-postDia | 36.0791 | 3.80359 | -3.24573 | 5.00E-05 | 0.0195319 |
| RNA-Seq | Trans-ABySS | XLOC_130928 | S321298:0-612 | cdRNA04-Dia-R3 | cdRNA05-postDia | 33.5867 | 3.80359 | -3.14246 | 5.00E-05 | 0.0195319 |
| RNA-Seq | Trans-ABySS | XLOC_132147 | S331819:1-254 | cdRNA02-Dia-R1 | cdRNA05-postDia | 25.3251 | 286.33  | 3.49903  | 5.00E-05 | 0.0195319 |
| RNA-Seq | Trans-ABySS | XLOC_132147 | S331819:1-254 | cdRNA03-Dia-R2 | cdRNA05-postDia | 24.858  | 286.33  | 3.52589  | 5.00E-05 | 0.0195319 |
| RNA-Seq | Trans-ABySS | XLOC_132147 | S331819:1-254 | cdRNA04-Dia-R3 | cdRNA05-postDia | 23.7895 | 286.33  | 3.58928  | 5.00E-05 | 0.0195319 |
| RNA-Seq | Trans-ABySS | XLOC_132309 | S333256:0-286 | cdRNA03-Dia-R2 | cdRNA05-postDia | 11.7161 | 110.381 | 3.23593  | 0.0002   | 0.0481888 |
| RNA-Seq | Trans-ABySS | XLOC_132694 | S336712:0-298 | cdRNA04-Dia-R3 | cdRNA05-postDia | 16.5419 | 107.155 | 2.69551  | 0.0002   | 0.0481888 |
| RNA-Seq | Trans-ABySS | XLOC_134040 | S348206:0-376 | cdRNA01-preDia | cdRNA05-postDia | 7.94219 | 65.6286 | 3.04672  | 5.00E-05 | 0.0195319 |
| RNA-Seq | Trans-ABySS | XLOC_136138 | S366125:0-371 | cdRNA01-preDia | cdRNA05-postDia | 9.53894 | 77.6308 | 3.02473  | 5.00E-05 | 0.0195319 |
| RNA-Seq | Trans-ABySS | XLOC_136366 | S368462:0-806 | cdRNA02-Dia-R1 | cdRNA05-postDia | 6.08196 | 31.8183 | 2.38725  | 0.00015  | 0.0374403 |
| RNA-Seq | Trans-ABySS | XLOC_137584 | S379317:0-728 | cdRNA01-preDia | cdRNA05-postDia | 2.95939 | 45.7777 | 3.95128  | 5.00E-05 | 0.0195319 |
| RNA-Seq | Trans-ABySS | XLOC_137927 | S382340:5-585 | cdRNA03-Dia-R2 | cdRNA05-postDia | 12.4567 | 62.9706 | 2.33776  | 0.00015  | 0.0374403 |
| RNA-Seq | Trans-ABySS | XLOC_138212 | S384983:0-385 | cdRNA01-preDia | cdRNA05-postDia | 14.3486 | 109.145 | 2.92726  | 5.00E-05 | 0.0195319 |
| RNA-Seq | Trans-ABySS | XLOC_139318 | S394841:0-222 | cdRNA02-Dia-R1 | cdRNA05-postDia | 80.469  | 603.018 | 2.90569  | 5.00E-05 | 0.0195319 |
| RNA-Seq | Trans-ABySS | XLOC_139318 | S394841:0-222 | cdRNA01-preDia | cdRNA05-postDia | 39.8352 | 603.018 | 3.92008  | 5.00E-05 | 0.0195319 |
| RNA-Seq | Trans-ABySS | XLOC_139318 | S394841:0-222 | cdRNA04-Dia-R3 | cdRNA05-postDia | 25.5671 | 603.018 | 4.55984  | 5.00E-05 | 0.0195319 |
| RNA-Seq | Trans-ABySS | XLOC_139318 | S394841:0-222 | cdRNA03-Dia-R2 | cdRNA05-postDia | 20.0366 | 603.018 | 4.91149  | 5.00E-05 | 0.0195319 |
| RNA-Seq | Trans-ABySS | XLOC_139817 | S399405:0-353 | cdRNA03-Dia-R2 | cdRNA05-postDia | 16.3872 | 96.2517 | 2.55424  | 0.0001   | 0.0354705 |
| RNA-Seq | Trans-ABySS | XLOC_141001 | S409833:0-962 | cdRNA04-Dia-R3 | cdRNA05-postDia | 9.06745 | 49.6042 | 2.45169  | 0.0001   | 0.0354705 |
| RNA-Seq | Trans-ABySS | XLOC_141001 | S409833:0-962 | cdRNA01-preDia | cdRNA05-postDia | 8.78499 | 49.6042 | 2.49735  | 5.00E-05 | 0.0195319 |
| RNA-Seq | Trans-ABySS | XLOC_141001 | S409833:0-962 | cdRNA02-Dia-R1 | cdRNA05-postDia | 5.40638 | 49.6042 | 3.19773  | 5.00E-05 | 0.0195319 |
| RNA-Seq | Trans-ABySS | XLOC_141037 | S41010:0-392  | cdRNA04-Dia-R3 | cdRNA05-postDia | 11.119  | 70.9414 | 2.6736   | 5.00E-05 | 0.0195319 |
| RNA-Seq | Trans-ABySS | XLOC_141663 | S415582:0-696 | cdRNA01-preDia | cdRNA04-Dia-R3  | 51.0787 | 3.47072 | -3.87942 | 5.00E-05 | 0.0195319 |
| RNA-Seq | Trans-ABySS | XLOC_141663 | S415582:0-696 | cdRNA01-preDia | cdRNA03-Dia-R2  | 51.0787 | 3.8986  | -3.7117  | 5.00E-05 | 0.0195319 |
| RNA-Seq | Trans-ABySS | XLOC_141663 | S415582:0-696 | cdRNA02-Dia-R1 | cdRNA04-Dia-R3  | 26.0801 | 3.47072 | -2.90965 | 5.00E-05 | 0.0195319 |
| RNA-Seq | Trans-ABySS | XLOC_141707 | S415901:0-571 | cdRNA02-Dia-R1 | cdRNA05-postDia | 14.6441 | 67.8975 | 2.21304  | 0.0002   | 0.0481888 |
| RNA-Seq | Trans-ABySS | XLOC_141707 | S415901:0-571 | cdRNA01-preDia | cdRNA05-postDia | 13.546  | 67.8975 | 2.3255   | 0.00015  | 0.0374403 |
| RNA-Seq | Trans-ABySS | XLOC_142674 | S424412:0-482 | cdRNA01-preDia | cdRNA03-Dia-R2  | 9.02324 | 53.7522 | 2.57461  | 0.0002   | 0.0481888 |

|         |             |             |                |                |                 |         |         |          |          |           |
|---------|-------------|-------------|----------------|----------------|-----------------|---------|---------|----------|----------|-----------|
| RNA-Seq | Trans-ABySS | XLOC_142674 | S424412:0-482  | cdRNA01-preDia | cdRNA04-Dia-R3  | 9.02324 | 55.4342 | 2.61906  | 0.00015  | 0.0374403 |
| RNA-Seq | Trans-ABySS | XLOC_142765 | S425228:0-264  | cdRNA02-Dia-R1 | cdRNA05-postDia | 45.9577 | 268.84  | 2.54837  | 0.0002   | 0.0481888 |
| RNA-Seq | Trans-ABySS | XLOC_142765 | S425228:0-264  | cdRNA01-preDia | cdRNA05-postDia | 26.2746 | 268.84  | 3.355    | 5.00E-05 | 0.0195319 |
| RNA-Seq | Trans-ABySS | XLOC_142884 | S426097:10-450 | cdRNA01-preDia | cdRNA04-Dia-R3  | 9.85597 | 58.0637 | 2.55857  | 5.00E-05 | 0.0195319 |
| RNA-Seq | Trans-ABySS | XLOC_143551 | S432113:0-296  | cdRNA01-preDia | cdRNA05-postDia | 16.578  | 108.67  | 2.71261  | 0.0001   | 0.0354705 |
| RNA-Seq | Trans-ABySS | XLOC_143686 | S433280:0-900  | cdRNA03-Dia-R2 | cdRNA05-postDia | 28.7129 | 3.56755 | -3.00869 | 5.00E-05 | 0.0195319 |
| RNA-Seq | Trans-ABySS | XLOC_143686 | S433280:0-900  | cdRNA04-Dia-R3 | cdRNA05-postDia | 26.988  | 3.56755 | -2.91932 | 5.00E-05 | 0.0195319 |
| RNA-Seq | Trans-ABySS | XLOC_144332 | S439031:0-708  | cdRNA04-Dia-R3 | cdRNA05-postDia | 3.13398 | 24.7209 | 2.97966  | 5.00E-05 | 0.0195319 |
| RNA-Seq | Trans-ABySS | XLOC_144332 | S439031:0-708  | cdRNA02-Dia-R1 | cdRNA05-postDia | 2.66588 | 24.7209 | 3.21304  | 5.00E-05 | 0.0195319 |
| RNA-Seq | Trans-ABySS | XLOC_144332 | S439031:0-708  | cdRNA03-Dia-R2 | cdRNA05-postDia | 2.56669 | 24.7209 | 3.26775  | 5.00E-05 | 0.0195319 |
| RNA-Seq | Trans-ABySS | XLOC_144419 | S439746:0-239  | cdRNA03-Dia-R2 | cdRNA05-postDia | 18.3625 | 272.914 | 3.89361  | 0.0001   | 0.0354705 |
| RNA-Seq | Trans-ABySS | XLOC_144435 | S439884:1-298  | cdRNA03-Dia-R2 | cdRNA05-postDia | 16.9839 | 114.979 | 2.75913  | 0.0002   | 0.0481888 |
| RNA-Seq | Trans-ABySS | XLOC_144435 | S439884:1-298  | cdRNA04-Dia-R3 | cdRNA05-postDia | 14.936  | 114.979 | 2.94451  | 0.0001   | 0.0354705 |
| RNA-Seq | Trans-ABySS | XLOC_144435 | S439884:1-298  | cdRNA01-preDia | cdRNA05-postDia | 13.6108 | 114.979 | 3.07855  | 5.00E-05 | 0.0195319 |
| RNA-Seq | Trans-ABySS | XLOC_145321 | S44790:0-182   | cdRNA01-preDia | cdRNA05-postDia | 111.633 | 613.492 | 2.45829  | 0.0002   | 0.0481888 |
| RNA-Seq | Trans-ABySS | XLOC_145321 | S44790:0-182   | cdRNA03-Dia-R2 | cdRNA05-postDia | 82.4419 | 613.492 | 2.89559  | 0.0001   | 0.0354705 |
| RNA-Seq | Trans-ABySS | XLOC_145340 | S448039:0-184  | cdRNA04-Dia-R3 | cdRNA05-postDia | 36.8924 | 412.981 | 3.48468  | 0.0002   | 0.0481888 |
| RNA-Seq | Trans-ABySS | XLOC_146164 | S455804:6-253  | cdRNA04-Dia-R3 | cdRNA05-postDia | 29.4028 | 240.395 | 3.03138  | 5.00E-05 | 0.0195319 |
| RNA-Seq | Trans-ABySS | XLOC_146164 | S455804:6-253  | cdRNA03-Dia-R2 | cdRNA05-postDia | 28.3601 | 240.395 | 3.08348  | 0.00015  | 0.0374403 |
| RNA-Seq | Trans-ABySS | XLOC_147298 | S465917:0-598  | cdRNA03-Dia-R2 | cdRNA05-postDia | 8.94402 | 57.0554 | 2.67337  | 5.00E-05 | 0.0195319 |
| RNA-Seq | Trans-ABySS | XLOC_147298 | S465917:0-598  | cdRNA04-Dia-R3 | cdRNA05-postDia | 7.04269 | 57.0554 | 3.01816  | 0.0001   | 0.0354705 |
| RNA-Seq | Trans-ABySS | XLOC_147325 | S466135:0-555  | cdRNA01-preDia | cdRNA05-postDia | 11.3048 | 49.2652 | 2.12364  | 0.0002   | 0.0481888 |
| RNA-Seq | Trans-ABySS | XLOC_147325 | S466135:0-555  | cdRNA02-Dia-R1 | cdRNA05-postDia | 8.42137 | 49.2652 | 2.54844  | 5.00E-05 | 0.0195319 |
| RNA-Seq | Trans-ABySS | XLOC_147473 | S467547:0-256  | cdRNA01-preDia | cdRNA05-postDia | 38.2107 | 220.076 | 2.52595  | 0.0001   | 0.0354705 |
| RNA-Seq | Trans-ABySS | XLOC_147473 | S467547:0-256  | cdRNA02-Dia-R1 | cdRNA05-postDia | 29.7341 | 220.076 | 2.88781  | 0.00015  | 0.0374403 |
| RNA-Seq | Trans-ABySS | XLOC_149087 | S482092:0-229  | cdRNA04-Dia-R3 | cdRNA05-postDia | 421.98  | 64.894  | -2.70102 | 0.00015  | 0.0374403 |
| RNA-Seq | Trans-ABySS | XLOC_150350 | S493190:0-827  | cdRNA01-preDia | cdRNA05-postDia | 2.63554 | 17.7215 | 2.74933  | 0.0001   | 0.0354705 |
| RNA-Seq | Trans-ABySS | XLOC_150350 | S493190:0-827  | cdRNA01-preDia | cdRNA03-Dia-R2  | 2.63554 | 24.9888 | 3.24511  | 5.00E-05 | 0.0195319 |
| RNA-Seq | Trans-ABySS | XLOC_150350 | S493190:0-827  | cdRNA01-preDia | cdRNA04-Dia-R3  | 2.63554 | 25.8333 | 3.29306  | 5.00E-05 | 0.0195319 |
| RNA-Seq | Trans-ABySS | XLOC_150350 | S493190:0-827  | cdRNA01-preDia | cdRNA02-Dia-R1  | 2.63554 | 43.8345 | 4.0559   | 5.00E-05 | 0.0195319 |
| RNA-Seq | Trans-ABySS | XLOC_150648 | S495731:0-374  | cdRNA01-preDia | cdRNA05-postDia | 9.10548 | 67.6911 | 2.89416  | 5.00E-05 | 0.0195319 |
| RNA-Seq | Trans-ABySS | XLOC_151132 | S499958:0-118  | cdRNA04-Dia-R3 | cdRNA05-postDia | 447.077 | 2928.98 | 2.7118   | 0.0001   | 0.0354705 |
| RNA-Seq | Trans-ABySS | XLOC_151132 | S499958:0-118  | cdRNA02-Dia-R1 | cdRNA05-postDia | 423.939 | 2928.98 | 2.78847  | 5.00E-05 | 0.0195319 |
| RNA-Seq | Trans-ABySS | XLOC_151142 | S500047:0-667  | cdRNA01-preDia | cdRNA02-Dia-R1  | 86.1945 | 1.59607 | -5.755   | 5.00E-05 | 0.0195319 |
| RNA-Seq | Trans-ABySS | XLOC_151142 | S500047:0-667  | cdRNA01-preDia | cdRNA04-Dia-R3  | 86.1945 | 5.43995 | -3.98593 | 5.00E-05 | 0.0195319 |
| RNA-Seq | Trans-ABySS | XLOC_151142 | S500047:0-667  | cdRNA01-preDia | cdRNA03-Dia-R2  | 86.1945 | 5.78062 | -3.8983  | 5.00E-05 | 0.0195319 |
| RNA-Seq | Trans-ABySS | XLOC_153197 | S517810:0-1096 | cdRNA04-Dia-R3 | cdRNA05-postDia | 9.76326 | 57.5621 | 2.55968  | 0.00015  | 0.0374403 |
| RNA-Seq | Trans-ABySS | XLOC_153197 | S517810:0-1096 | cdRNA03-Dia-R2 | cdRNA05-postDia | 9.40163 | 57.5621 | 2.61414  | 0.0001   | 0.0354705 |
| RNA-Seq | Trans-ABySS | XLOC_153900 | S52414:1-159   | cdRNA01-preDia | cdRNA05-postDia | 119.404 | 951.101 | 2.99374  | 5.00E-05 | 0.0195319 |
| RNA-Seq | Trans-ABySS | XLOC_153991 | S525034:0-580  | cdRNA01-preDia | cdRNA05-postDia | 3.03251 | 31.3674 | 3.37068  | 5.00E-05 | 0.0195319 |
| RNA-Seq | Trans-ABySS | XLOC_154782 | S531848:2-475  | cdRNA02-Dia-R1 | cdRNA05-postDia | 12.6116 | 82.5779 | 2.711    | 5.00E-05 | 0.0195319 |
| RNA-Seq | Trans-ABySS | XLOC_155149 | S535092:0-487  | cdRNA02-Dia-R1 | cdRNA05-postDia | 22.4325 | 115.624 | 2.36578  | 0.00015  | 0.0374403 |
| RNA-Seq | Trans-ABySS | XLOC_155158 | S535140:0-851  | cdRNA01-preDia | cdRNA05-postDia | 2.96075 | 26.4529 | 3.15939  | 5.00E-05 | 0.0195319 |
| RNA-Seq | Trans-ABySS | XLOC_155556 | S538828:13-453 | cdRNA04-Dia-R3 | cdRNA05-postDia | 50.2857 | 5.4483  | -3.20627 | 5.00E-05 | 0.0195319 |
| RNA-Seq | Trans-ABySS | XLOC_155556 | S538828:13-453 | cdRNA03-Dia-R2 | cdRNA05-postDia | 48.3861 | 5.4483  | -3.15071 | 5.00E-05 | 0.0195319 |
| RNA-Seq | Trans-ABySS | XLOC_155556 | S538828:13-453 | cdRNA01-preDia | cdRNA03-Dia-R2  | 7.15041 | 48.3861 | 2.75849  | 0.0001   | 0.0354705 |
| RNA-Seq | Trans-ABySS | XLOC_155556 | S538828:13-453 | cdRNA01-preDia | cdRNA04-Dia-R3  | 7.15041 | 50.2857 | 2.81405  | 5.00E-05 | 0.0195319 |

|         |             |             |                |                |                 |         |         |          |          |           |
|---------|-------------|-------------|----------------|----------------|-----------------|---------|---------|----------|----------|-----------|
| RNA-Seq | Trans-ABySS | XLOC_156204 | S544452:0-366  | cdRNA04-Dia-R3 | cdRNA05-postDia | 10.5128 | 66.0599 | 2.65162  | 0.0002   | 0.0481888 |
| RNA-Seq | Trans-ABySS | XLOC_156258 | S544847:0-434  | cdRNA01-preDia | cdRNA03-Dia-R2  | 4.95737 | 70.5933 | 3.83189  | 5.00E-05 | 0.0195319 |
| RNA-Seq | Trans-ABySS | XLOC_156258 | S544847:0-434  | cdRNA01-preDia | cdRNA04-Dia-R3  | 4.95737 | 77.3959 | 3.96461  | 5.00E-05 | 0.0195319 |
| RNA-Seq | Trans-ABySS | XLOC_157473 | S555625:0-236  | cdRNA04-Dia-R3 | cdRNA05-postDia | 39.2173 | 249.826 | 2.67136  | 0.00015  | 0.0374403 |
| RNA-Seq | Trans-ABySS | XLOC_158073 | S561208:0-234  | cdRNA01-preDia | cdRNA05-postDia | 46.897  | 277.268 | 2.56371  | 0.0002   | 0.0481888 |
| RNA-Seq | Trans-ABySS | XLOC_159568 | S574540:0-194  | cdRNA02-Dia-R1 | cdRNA05-postDia | 96.0588 | 514.237 | 2.42044  | 0.0001   | 0.0354705 |
| RNA-Seq | Trans-ABySS | XLOC_159568 | S574540:0-194  | cdRNA04-Dia-R3 | cdRNA05-postDia | 66.1275 | 514.237 | 2.95911  | 5.00E-05 | 0.0195319 |
| RNA-Seq | Trans-ABySS | XLOC_159568 | S574540:0-194  | cdRNA03-Dia-R2 | cdRNA05-postDia | 47.8368 | 514.237 | 3.42624  | 5.00E-05 | 0.0195319 |
| RNA-Seq | Trans-ABySS | XLOC_160652 | S584346:0-166  | cdRNA04-Dia-R3 | cdRNA05-postDia | 89.799  | 746.147 | 3.05469  | 0.0002   | 0.0481888 |
| RNA-Seq | Trans-ABySS | XLOC_160652 | S584346:0-166  | cdRNA03-Dia-R2 | cdRNA05-postDia | 71.938  | 746.147 | 3.37463  | 0.0002   | 0.0481888 |
| RNA-Seq | Trans-ABySS | XLOC_162104 | S597500:2-849  | cdRNA01-preDia | cdRNA05-postDia | 14.4702 | 92.0578 | 2.66945  | 0.00015  | 0.0374403 |
| RNA-Seq | Trans-ABySS | XLOC_162104 | S597500:2-849  | cdRNA02-Dia-R1 | cdRNA05-postDia | 7.5748  | 92.0578 | 3.60326  | 5.00E-05 | 0.0195319 |
| RNA-Seq | Trans-ABySS | XLOC_162104 | S597500:2-849  | cdRNA04-Dia-R3 | cdRNA05-postDia | 4.31548 | 92.0578 | 4.41495  | 5.00E-05 | 0.0195319 |
| RNA-Seq | Trans-ABySS | XLOC_162104 | S597500:2-849  | cdRNA03-Dia-R2 | cdRNA05-postDia | 4.16244 | 92.0578 | 4.46704  | 5.00E-05 | 0.0195319 |
| RNA-Seq | Trans-ABySS | XLOC_162166 | S598012:0-608  | cdRNA01-preDia | cdRNA05-postDia | 4.51575 | 74.7396 | 4.04884  | 5.00E-05 | 0.0195319 |
| RNA-Seq | Trans-ABySS | XLOC_162166 | S598012:0-608  | cdRNA03-Dia-R2 | cdRNA05-postDia | 4.41653 | 74.7396 | 4.08089  | 5.00E-05 | 0.0195319 |
| RNA-Seq | Trans-ABySS | XLOC_162166 | S598012:0-608  | cdRNA04-Dia-R3 | cdRNA05-postDia | 2.32468 | 74.7396 | 5.00677  | 5.00E-05 | 0.0195319 |
| RNA-Seq | Trans-ABySS | XLOC_163333 | S608015:0-196  | cdRNA04-Dia-R3 | cdRNA05-postDia | 60.4991 | 371.924 | 2.62002  | 0.00015  | 0.0374403 |
| RNA-Seq | Trans-ABySS | XLOC_163337 | S608076:0-329  | cdRNA02-Dia-R1 | cdRNA05-postDia | 49.0719 | 249.647 | 2.34692  | 0.00015  | 0.0374403 |
| RNA-Seq | Trans-ABySS | XLOC_163337 | S608076:0-329  | cdRNA03-Dia-R2 | cdRNA05-postDia | 47.2018 | 249.647 | 2.40297  | 0.00015  | 0.0374403 |
| RNA-Seq | Trans-ABySS | XLOC_163337 | S608076:0-329  | cdRNA04-Dia-R3 | cdRNA05-postDia | 45.1729 | 249.647 | 2.46636  | 5.00E-05 | 0.0195319 |
| RNA-Seq | Trans-ABySS | XLOC_165678 | S629087:1-281  | cdRNA03-Dia-R2 | cdRNA05-postDia | 48.6805 | 238.714 | 2.29387  | 5.00E-05 | 0.0195319 |
| RNA-Seq | Trans-ABySS | XLOC_168140 | S651254:0-765  | cdRNA02-Dia-R1 | cdRNA05-postDia | 7.90358 | 42.2053 | 2.41685  | 0.00015  | 0.0374403 |
| RNA-Seq | Trans-ABySS | XLOC_168869 | S658009:3-325  | cdRNA01-preDia | cdRNA05-postDia | 19.3782 | 120.05  | 2.63112  | 5.00E-05 | 0.0195319 |
| RNA-Seq | Trans-ABySS | XLOC_168869 | S658009:3-325  | cdRNA03-Dia-R2 | cdRNA05-postDia | 11.8917 | 120.05  | 3.3356   | 0.0001   | 0.0354705 |
| RNA-Seq | Trans-ABySS | XLOC_168869 | S658009:3-325  | cdRNA04-Dia-R3 | cdRNA05-postDia | 10.6693 | 120.05  | 3.4921   | 5.00E-05 | 0.0195319 |
| RNA-Seq | Trans-ABySS | XLOC_168869 | S658009:3-325  | cdRNA02-Dia-R1 | cdRNA05-postDia | 8.67487 | 120.05  | 3.79064  | 5.00E-05 | 0.0195319 |
| RNA-Seq | Trans-ABySS | XLOC_169115 | S659983:0-231  | cdRNA01-preDia | cdRNA05-postDia | 64.8787 | 353.203 | 2.44468  | 0.0002   | 0.0481888 |
| RNA-Seq | Trans-ABySS | XLOC_169115 | S659983:0-231  | cdRNA03-Dia-R2 | cdRNA05-postDia | 52.715  | 353.203 | 2.74421  | 5.00E-05 | 0.0195319 |
| RNA-Seq | Trans-ABySS | XLOC_169115 | S659983:0-231  | cdRNA04-Dia-R3 | cdRNA05-postDia | 39.2382 | 353.203 | 3.17017  | 5.00E-05 | 0.0195319 |
| RNA-Seq | Trans-ABySS | XLOC_169115 | S659983:0-231  | cdRNA02-Dia-R1 | cdRNA05-postDia | 38.2252 | 353.203 | 3.2079   | 5.00E-05 | 0.0195319 |
| RNA-Seq | Trans-ABySS | XLOC_170030 | S668139:0-62   | cdRNA01-preDia | cdRNA05-postDia | 31772.6 | 253750  | 2.99755  | 5.00E-05 | 0.0195319 |
| RNA-Seq | Trans-ABySS | XLOC_171149 | S678393:0-63   | cdRNA02-Dia-R1 | cdRNA05-postDia | 128601  | 5133.68 | -4.64676 | 5.00E-05 | 0.0195319 |
| RNA-Seq | Trans-ABySS | XLOC_171194 | S678809:0-413  | cdRNA03-Dia-R2 | cdRNA05-postDia | 61.6713 | 5.93917 | -3.37627 | 5.00E-05 | 0.0195319 |
| RNA-Seq | Trans-ABySS | XLOC_171194 | S678809:0-413  | cdRNA04-Dia-R3 | cdRNA05-postDia | 60.2458 | 5.93917 | -3.34253 | 5.00E-05 | 0.0195319 |
| RNA-Seq | Trans-ABySS | XLOC_171194 | S678809:0-413  | cdRNA02-Dia-R1 | cdRNA04-Dia-R3  | 8.51663 | 60.2458 | 2.82251  | 5.00E-05 | 0.0195319 |
| RNA-Seq | Trans-ABySS | XLOC_171194 | S678809:0-413  | cdRNA02-Dia-R1 | cdRNA03-Dia-R2  | 8.51663 | 61.6713 | 2.85624  | 5.00E-05 | 0.0195319 |
| RNA-Seq | Trans-ABySS | XLOC_172354 | S68924:0-364   | cdRNA04-Dia-R3 | cdRNA05-postDia | 10.9075 | 73.2235 | 2.74699  | 5.00E-05 | 0.0195319 |
| RNA-Seq | Trans-ABySS | XLOC_172883 | S694139:0-1406 | cdRNA04-Dia-R3 | cdRNA05-postDia | 4.47504 | 23.461  | 2.39029  | 0.00015  | 0.0374403 |
| RNA-Seq | Trans-ABySS | XLOC_172883 | S694139:0-1406 | cdRNA03-Dia-R2 | cdRNA05-postDia | 3.85958 | 23.461  | 2.60375  | 5.00E-05 | 0.0195319 |
| RNA-Seq | Trans-ABySS | XLOC_173102 | S696157:0-244  | cdRNA03-Dia-R2 | cdRNA05-postDia | 42.5709 | 257.96  | 2.5992   | 0.0002   | 0.0481888 |
| RNA-Seq | Trans-ABySS | XLOC_173464 | S699341:0-541  | cdRNA04-Dia-R3 | cdRNA05-postDia | 5.70035 | 36.313  | 2.67136  | 0.00015  | 0.0374403 |
| RNA-Seq | Trans-ABySS | XLOC_174284 | S706664:0-1006 | cdRNA02-Dia-R1 | cdRNA05-postDia | 10.052  | 70.7112 | 2.81445  | 5.00E-05 | 0.0195319 |
| RNA-Seq | Trans-ABySS | XLOC_174284 | S706664:0-1006 | cdRNA01-preDia | cdRNA05-postDia | 4.89082 | 70.7112 | 3.85379  | 5.00E-05 | 0.0195319 |
| RNA-Seq | Trans-ABySS | XLOC_174284 | S706664:0-1006 | cdRNA04-Dia-R3 | cdRNA05-postDia | 1.9695  | 70.7112 | 5.16604  | 5.00E-05 | 0.0195319 |
| RNA-Seq | Trans-ABySS | XLOC_174284 | S706664:0-1006 | cdRNA03-Dia-R2 | cdRNA05-postDia | 1.27927 | 70.7112 | 5.78854  | 5.00E-05 | 0.0195319 |
| RNA-Seq | Trans-ABySS | XLOC_174983 | S71278:8-267   | cdRNA02-Dia-R1 | cdRNA05-postDia | 33.8217 | 219.166 | 2.696    | 0.0001   | 0.0354705 |

|         |             |             |                |                |                 |          |         |          |          |           |
|---------|-------------|-------------|----------------|----------------|-----------------|----------|---------|----------|----------|-----------|
| RNA-Seq | Trans-ABySS | XLOC_176054 | S722140:0-1335 | cdRNA03-Dia-R2 | cdRNA05-postDia | 30.764   | 5.84141 | -2.39686 | 0.00015  | 0.0374403 |
| RNA-Seq | Trans-ABySS | XLOC_176508 | S726356:0-721  | cdRNA04-Dia-R3 | cdRNA05-postDia | 8.83524  | 56.5175 | 2.67736  | 5.00E-05 | 0.0195319 |
| RNA-Seq | Trans-ABySS | XLOC_176508 | S726356:0-721  | cdRNA03-Dia-R2 | cdRNA05-postDia | 8.28297  | 56.5175 | 2.77048  | 5.00E-05 | 0.0195319 |
| RNA-Seq | Trans-ABySS | XLOC_177026 | S730778:0-1369 | cdRNA01-preDia | cdRNA02-Dia-R1  | 6.96874  | 53.6585 | 2.94484  | 5.00E-05 | 0.0195319 |
| RNA-Seq | Trans-ABySS | XLOC_177303 | S733248:0-759  | cdRNA01-preDia | cdRNA04-Dia-R3  | 7.97138  | 39.6132 | 2.31308  | 0.0001   | 0.0354705 |
| RNA-Seq | Trans-ABySS | XLOC_177540 | S735220:0-647  | cdRNA01-preDia | cdRNA05-postDia | 11.83399 | 81.3717 | 2.78088  | 5.00E-05 | 0.0195319 |
| RNA-Seq | Trans-ABySS | XLOC_177540 | S735220:0-647  | cdRNA03-Dia-R2 | cdRNA05-postDia | 10.17    | 81.3717 | 3.00021  | 5.00E-05 | 0.0195319 |
| RNA-Seq | Trans-ABySS | XLOC_177540 | S735220:0-647  | cdRNA04-Dia-R3 | cdRNA05-postDia | 8.76922  | 81.3717 | 3.21401  | 5.00E-05 | 0.0195319 |
| RNA-Seq | Trans-ABySS | XLOC_177540 | S735220:0-647  | cdRNA02-Dia-R1 | cdRNA05-postDia | 5.83845  | 81.3717 | 3.80087  | 5.00E-05 | 0.0195319 |
| RNA-Seq | Trans-ABySS | XLOC_178249 | S741185:0-1361 | cdRNA01-preDia | cdRNA03-Dia-R2  | 21.3661  | 3.54704 | -2.59064 | 0.0001   | 0.0354705 |
| RNA-Seq | Trans-ABySS | XLOC_178249 | S741185:0-1361 | cdRNA01-preDia | cdRNA04-Dia-R3  | 21.3661  | 3.87424 | -2.46334 | 0.0001   | 0.0354705 |
| RNA-Seq | Trans-ABySS | XLOC_178249 | S741185:0-1361 | cdRNA03-Dia-R2 | cdRNA05-postDia | 3.54704  | 17.9735 | 2.34119  | 0.00015  | 0.0374403 |
| RNA-Seq | Trans-ABySS | XLOC_178537 | S743626:0-389  | cdRNA01-preDia | cdRNA05-postDia | 3.44872  | 52.6849 | 3.93326  | 0.0002   | 0.0481888 |
| RNA-Seq | Trans-ABySS | XLOC_178770 | S745704:0-646  | cdRNA03-Dia-R2 | cdRNA05-postDia | 33.7076  | 5.81825 | -2.53442 | 0.00015  | 0.0374403 |
| RNA-Seq | Trans-ABySS | XLOC_178770 | S745704:0-646  | cdRNA04-Dia-R3 | cdRNA05-postDia | 33.3211  | 5.81825 | -2.51778 | 0.00015  | 0.0374403 |
| RNA-Seq | Trans-ABySS | XLOC_179703 | S754033:0-179  | cdRNA04-Dia-R3 | cdRNA05-postDia | 131.394  | 795.293 | 2.59759  | 0.0001   | 0.0354705 |
| RNA-Seq | Trans-ABySS | XLOC_179703 | S754033:0-179  | cdRNA02-Dia-R1 | cdRNA05-postDia | 98.0385  | 795.293 | 3.02006  | 0.00015  | 0.0374403 |
| RNA-Seq | Trans-ABySS | XLOC_179703 | S754033:0-179  | cdRNA03-Dia-R2 | cdRNA05-postDia | 61.5461  | 795.293 | 3.69175  | 5.00E-05 | 0.0195319 |
| RNA-Seq | Trans-ABySS | XLOC_179823 | S755006:0-265  | cdRNA01-preDia | cdRNA05-postDia | 42.8663  | 325.172 | 2.92329  | 5.00E-05 | 0.0195319 |
| RNA-Seq | Trans-ABySS | XLOC_179823 | S755006:0-265  | cdRNA04-Dia-R3 | cdRNA05-postDia | 24.9245  | 325.172 | 3.70557  | 5.00E-05 | 0.0195319 |
| RNA-Seq | Trans-ABySS | XLOC_179823 | S755006:0-265  | cdRNA03-Dia-R2 | cdRNA05-postDia | 22.2327  | 325.172 | 3.87045  | 5.00E-05 | 0.0195319 |
| RNA-Seq | Trans-ABySS | XLOC_179823 | S755006:0-265  | cdRNA02-Dia-R1 | cdRNA05-postDia | 19.6117  | 325.172 | 4.05142  | 5.00E-05 | 0.0195319 |
| RNA-Seq | Trans-ABySS | XLOC_181916 | S774052:2-363  | cdRNA01-preDia | cdRNA05-postDia | 14.4768  | 88.3826 | 2.61002  | 0.00015  | 0.0374403 |
| RNA-Seq | Trans-ABySS | XLOC_182768 | S781332:0-167  | cdRNA03-Dia-R2 | cdRNA05-postDia | 45.8753  | 571.516 | 3.639    | 0.0002   | 0.0481888 |
| RNA-Seq | Trans-ABySS | XLOC_183246 | S785948:0-855  | cdRNA03-Dia-R2 | cdRNA05-postDia | 10.9634  | 62.7972 | 2.518    | 5.00E-05 | 0.0195319 |
| RNA-Seq | Trans-ABySS | XLOC_183246 | S785948:0-855  | cdRNA04-Dia-R3 | cdRNA05-postDia | 10.2299  | 62.7972 | 2.61791  | 5.00E-05 | 0.0195319 |
| RNA-Seq | Trans-ABySS | XLOC_183250 | S785975:0-615  | cdRNA01-preDia | cdRNA05-postDia | 60.9231  | 8.19893 | -2.89348 | 5.00E-05 | 0.0195319 |
| RNA-Seq | Trans-ABySS | XLOC_184619 | S798635:0-524  | cdRNA02-Dia-R1 | cdRNA05-postDia | 4.40864  | 39.2119 | 3.15289  | 0.0001   | 0.0354705 |
| RNA-Seq | Trans-ABySS | XLOC_184619 | S798635:0-524  | cdRNA04-Dia-R3 | cdRNA05-postDia | 4.13552  | 39.2119 | 3.24515  | 5.00E-05 | 0.0195319 |
| RNA-Seq | Trans-ABySS | XLOC_184619 | S798635:0-524  | cdRNA03-Dia-R2 | cdRNA05-postDia | 3.34549  | 39.2119 | 3.551    | 5.00E-05 | 0.0195319 |
| RNA-Seq | Trans-ABySS | XLOC_184933 | S801301:0-572  | cdRNA01-preDia | cdRNA02-Dia-R1  | 40.0317  | 2.00809 | -4.31725 | 5.00E-05 | 0.0195319 |
| RNA-Seq | Trans-ABySS | XLOC_185208 | S803745:0-101  | cdRNA02-Dia-R1 | cdRNA05-postDia | 440.536  | 5396.42 | 3.61467  | 0.0002   | 0.0481888 |
| RNA-Seq | Trans-ABySS | XLOC_185486 | S806171:0-507  | cdRNA02-Dia-R1 | cdRNA05-postDia | 6.87311  | 52.972  | 2.94619  | 0.0002   | 0.0481888 |
| RNA-Seq | Trans-ABySS | XLOC_186145 | S811973:0-336  | cdRNA03-Dia-R2 | cdRNA05-postDia | 39.4873  | 206.894 | 2.38943  | 0.00015  | 0.0374403 |
| RNA-Seq | Trans-ABySS | XLOC_186145 | S811973:0-336  | cdRNA02-Dia-R1 | cdRNA05-postDia | 28.7268  | 206.894 | 2.84843  | 5.00E-05 | 0.0195319 |
| RNA-Seq | Trans-ABySS | XLOC_186901 | S818457:1-169  | cdRNA01-preDia | cdRNA05-postDia | 1229.41  | 110.003 | -3.48234 | 5.00E-05 | 0.0195319 |
| RNA-Seq | Trans-ABySS | XLOC_187376 | S822859:5-742  | cdRNA02-Dia-R1 | cdRNA05-postDia | 11.2177  | 64.6372 | 2.52658  | 0.0001   | 0.0354705 |
| RNA-Seq | Trans-ABySS | XLOC_187747 | S826258:0-635  | cdRNA02-Dia-R1 | cdRNA05-postDia | 5.84513  | 28.1877 | 2.26976  | 0.0002   | 0.0481888 |
| RNA-Seq | Trans-ABySS | XLOC_188418 | S832312:1-306  | cdRNA02-Dia-R1 | cdRNA05-postDia | 23.8195  | 144.038 | 2.59623  | 5.00E-05 | 0.0195319 |
| RNA-Seq | Trans-ABySS | XLOC_188449 | S832620:1-567  | cdRNA01-preDia | cdRNA03-Dia-R2  | 26.4582  | 2.21802 | -3.57637 | 0.00015  | 0.0374403 |
| RNA-Seq | Trans-ABySS | XLOC_188449 | S832620:1-567  | cdRNA01-preDia | cdRNA04-Dia-R3  | 26.4582  | 2.35853 | -3.48775 | 0.0001   | 0.0354705 |
| RNA-Seq | Trans-ABySS | XLOC_188912 | S836722:0-304  | cdRNA01-preDia | cdRNA05-postDia | 15.431   | 90.0075 | 2.54422  | 5.00E-05 | 0.0195319 |
| RNA-Seq | Trans-ABySS | XLOC_189122 | S838425:0-446  | cdRNA01-preDia | cdRNA03-Dia-R2  | 34.8657  | 2.76483 | -3.65654 | 0.00015  | 0.0374403 |
| RNA-Seq | Trans-ABySS | XLOC_191991 | S865189:0-178  | cdRNA02-Dia-R1 | cdRNA05-postDia | 58.2204  | 489.927 | 3.07297  | 0.00015  | 0.0374403 |
| RNA-Seq | Trans-ABySS | XLOC_191991 | S865189:0-178  | cdRNA01-preDia | cdRNA05-postDia | 46.9376  | 489.927 | 3.38375  | 0.0002   | 0.0481888 |
| RNA-Seq | Trans-ABySS | XLOC_192880 | S873696:0-773  | cdRNA03-Dia-R2 | cdRNA05-postDia | 2.74386  | 22.1307 | 3.01177  | 0.0001   | 0.0354705 |
| RNA-Seq | Trans-ABySS | XLOC_193676 | S880752:0-609  | cdRNA02-Dia-R1 | cdRNA05-postDia | 7.63031  | 49.4844 | 2.69716  | 5.00E-05 | 0.0195319 |

|         |             |             |                |                |                 |         |         |          |          |           |
|---------|-------------|-------------|----------------|----------------|-----------------|---------|---------|----------|----------|-----------|
| RNA-Seq | Trans-ABySS | XLOC_194188 | S885128:0-361  | cdRNA01-preDia | cdRNA05-postDia | 10.4233 | 64.7388 | 2.63482  | 0.0002   | 0.0481888 |
| RNA-Seq | Trans-ABySS | XLOC_194255 | S88570:0-282   | cdRNA03-Dia-R2 | cdRNA05-postDia | 39.7534 | 278.71  | 2.80961  | 0.0001   | 0.0354705 |
| RNA-Seq | Trans-ABySS | XLOC_194255 | S88570:0-282   | cdRNA04-Dia-R3 | cdRNA05-postDia | 32.9721 | 278.71  | 3.07945  | 5.00E-05 | 0.0195319 |
| RNA-Seq | Trans-ABySS | XLOC_194255 | S88570:0-282   | cdRNA02-Dia-R1 | cdRNA05-postDia | 29.1369 | 278.71  | 3.25784  | 5.00E-05 | 0.0195319 |
| RNA-Seq | Trans-ABySS | XLOC_194255 | S88570:0-282   | cdRNA01-preDia | cdRNA05-postDia | 8.1293  | 278.71  | 5.09949  | 5.00E-05 | 0.0195319 |
| RNA-Seq | Trans-ABySS | XLOC_195749 | S899445:0-1161 | cdRNA02-Dia-R1 | cdRNA05-postDia | 4.87888 | 35.3977 | 2.85903  | 5.00E-05 | 0.0195319 |
| RNA-Seq | Trans-ABySS | XLOC_195749 | S899445:0-1161 | cdRNA04-Dia-R3 | cdRNA05-postDia | 3.47947 | 35.3977 | 3.34672  | 5.00E-05 | 0.0195319 |
| RNA-Seq | Trans-ABySS | XLOC_195749 | S899445:0-1161 | cdRNA03-Dia-R2 | cdRNA05-postDia | 3.30946 | 35.3977 | 3.41899  | 5.00E-05 | 0.0195319 |
| RNA-Seq | Trans-ABySS | XLOC_196467 | S905950:0-174  | cdRNA04-Dia-R3 | cdRNA05-postDia | 62.8372 | 660.482 | 3.39383  | 0.0002   | 0.0481888 |
| RNA-Seq | Trans-ABySS | XLOC_196467 | S905950:0-174  | cdRNA03-Dia-R2 | cdRNA05-postDia | 49.9012 | 660.482 | 3.72637  | 0.00015  | 0.0374403 |
| RNA-Seq | Trans-ABySS | XLOC_197203 | S913024:0-365  | cdRNA02-Dia-R1 | cdRNA05-postDia | 14.3559 | 82.6652 | 2.52564  | 0.0002   | 0.0481888 |
| RNA-Seq | Trans-ABySS | XLOC_197203 | S913024:0-365  | cdRNA03-Dia-R2 | cdRNA05-postDia | 11.3281 | 82.6652 | 2.86737  | 5.00E-05 | 0.0195319 |
| RNA-Seq | Trans-ABySS | XLOC_197203 | S913024:0-365  | cdRNA04-Dia-R3 | cdRNA05-postDia | 10.5768 | 82.6652 | 2.96638  | 0.0001   | 0.0354705 |
| RNA-Seq | Trans-ABySS | XLOC_197203 | S913024:0-365  | cdRNA01-preDia | cdRNA05-postDia | 3.95503 | 82.6652 | 4.38552  | 5.00E-05 | 0.0195319 |
| RNA-Seq | Trans-ABySS | XLOC_197645 | S917455:0-2027 | cdRNA01-preDia | cdRNA05-postDia | 5.02888 | 30.6951 | 2.6097   | 5.00E-05 | 0.0195319 |
| RNA-Seq | Trans-ABySS | XLOC_199210 | S930955:1-1224 | cdRNA01-preDia | cdRNA05-postDia | 6.98248 | 38.8571 | 2.47637  | 5.00E-05 | 0.0195319 |
| RNA-Seq | Trans-ABySS | XLOC_199252 | S931263:0-640  | cdRNA02-Dia-R1 | cdRNA05-postDia | 14.6378 | 96.5086 | 2.72095  | 5.00E-05 | 0.0195319 |
| RNA-Seq | Trans-ABySS | XLOC_199252 | S931263:0-640  | cdRNA03-Dia-R2 | cdRNA05-postDia | 12.6864 | 96.5086 | 2.92737  | 5.00E-05 | 0.0195319 |
| RNA-Seq | Trans-ABySS | XLOC_199252 | S931263:0-640  | cdRNA04-Dia-R3 | cdRNA05-postDia | 9.98704 | 96.5086 | 3.27253  | 5.00E-05 | 0.0195319 |
| RNA-Seq | Trans-ABySS | XLOC_199485 | S933401:0-648  | cdRNA04-Dia-R3 | cdRNA05-postDia | 7.69184 | 38.0477 | 2.30641  | 0.0002   | 0.0481888 |
| RNA-Seq | Trans-ABySS | XLOC_199485 | S933401:0-648  | cdRNA03-Dia-R2 | cdRNA05-postDia | 7.03265 | 38.0477 | 2.43567  | 0.0001   | 0.0354705 |
| RNA-Seq | Trans-ABySS | XLOC_200157 | S939667:0-155  | cdRNA02-Dia-R1 | cdRNA05-postDia | 231.897 | 1607.05 | 2.79286  | 5.00E-05 | 0.0195319 |
| RNA-Seq | Trans-ABySS | XLOC_200824 | S946026:0-1011 | cdRNA01-preDia | cdRNA03-Dia-R2  | 3.5041  | 24.5425 | 2.80817  | 0.00015  | 0.0374403 |
| RNA-Seq | Trans-ABySS | XLOC_200824 | S946026:0-1011 | cdRNA01-preDia | cdRNA04-Dia-R3  | 3.5041  | 24.9159 | 2.82995  | 0.00015  | 0.0374403 |
| RNA-Seq | Trans-ABySS | XLOC_200995 | S947604:0-980  | cdRNA01-preDia | cdRNA05-postDia | 7.34693 | 36.7402 | 2.32214  | 0.0001   | 0.0354705 |
| RNA-Seq | Trans-ABySS | XLOC_201408 | S951781:0-443  | cdRNA01-preDia | cdRNA05-postDia | 9.73226 | 67.8983 | 2.80253  | 5.00E-05 | 0.0195319 |
| RNA-Seq | Trans-ABySS | XLOC_202044 | S957540:0-413  | cdRNA02-Dia-R1 | cdRNA05-postDia | 18.6402 | 100.542 | 2.43131  | 0.0002   | 0.0481888 |
| RNA-Seq | Trans-ABySS | XLOC_203230 | S968288:0-1353 | cdRNA02-Dia-R1 | cdRNA05-postDia | 9.58897 | 51.9806 | 2.43853  | 0.0002   | 0.0481888 |
| RNA-Seq | Trans-ABySS | XLOC_203358 | S969408:0-236  | cdRNA02-Dia-R1 | cdRNA05-postDia | 65.8299 | 397.368 | 2.59366  | 5.00E-05 | 0.0195319 |
| RNA-Seq | Trans-ABySS | XLOC_203358 | S969408:0-236  | cdRNA01-preDia | cdRNA05-postDia | 35.3816 | 397.368 | 3.4894   | 5.00E-05 | 0.0195319 |
| RNA-Seq | Trans-ABySS | XLOC_203358 | S969408:0-236  | cdRNA03-Dia-R2 | cdRNA05-postDia | 30.051  | 397.368 | 3.72499  | 5.00E-05 | 0.0195319 |
| RNA-Seq | Trans-ABySS | XLOC_203358 | S969408:0-236  | cdRNA04-Dia-R3 | cdRNA05-postDia | 28.7593 | 397.368 | 3.78837  | 5.00E-05 | 0.0195319 |
| RNA-Seq | Trans-ABySS | XLOC_204233 | S977408:0-227  | cdRNA03-Dia-R2 | cdRNA05-postDia | 68.2323 | 416.183 | 2.60869  | 0.0001   | 0.0354705 |
| RNA-Seq | Trans-ABySS | XLOC_204233 | S977408:0-227  | cdRNA04-Dia-R3 | cdRNA05-postDia | 58.3738 | 416.183 | 2.83382  | 5.00E-05 | 0.0195319 |
| RNA-Seq | Trans-ABySS | XLOC_204233 | S977408:0-227  | cdRNA01-preDia | cdRNA05-postDia | 30.6544 | 416.183 | 3.76305  | 5.00E-05 | 0.0195319 |
| RNA-Seq | Trans-ABySS | XLOC_204980 | S984308:0-1360 | cdRNA03-Dia-R2 | cdRNA05-postDia | 9.83997 | 53.6221 | 2.4461   | 0.00015  | 0.0374403 |
| RNA-Seq | Trans-ABySS | XLOC_204980 | S984308:0-1360 | cdRNA04-Dia-R3 | cdRNA05-postDia | 9.2693  | 53.6221 | 2.53229  | 5.00E-05 | 0.0195319 |
| RNA-Seq | Trans-ABySS | XLOC_204980 | S984308:0-1360 | cdRNA02-Dia-R1 | cdRNA05-postDia | 9.06598 | 53.6221 | 2.56429  | 5.00E-05 | 0.0195319 |
| RNA-Seq | Trans-ABySS | XLOC_205146 | S985626:0-733  | cdRNA02-Dia-R1 | cdRNA05-postDia | 9.39763 | 50.5417 | 2.42711  | 5.00E-05 | 0.0195319 |
| RNA-Seq | Trans-ABySS | XLOC_205146 | S985626:0-733  | cdRNA04-Dia-R3 | cdRNA05-postDia | 9.11901 | 50.5417 | 2.47052  | 0.00015  | 0.0374403 |
| RNA-Seq | Trans-ABySS | XLOC_205146 | S985626:0-733  | cdRNA03-Dia-R2 | cdRNA05-postDia | 8.60102 | 50.5417 | 2.55489  | 5.00E-05 | 0.0195319 |
| RNA-Seq | Trans-ABySS | XLOC_205146 | S985626:0-733  | cdRNA01-preDia | cdRNA05-postDia | 3.19007 | 50.5417 | 3.98581  | 5.00E-05 | 0.0195319 |
| RNA-Seq | Trans-ABySS | XLOC_205428 | S988095:0-1138 | cdRNA01-preDia | cdRNA03-Dia-R2  | 29.9249 | 5.42247 | -2.46432 | 5.00E-05 | 0.0195319 |
| RNA-Seq | Trans-ABySS | XLOC_205428 | S988095:0-1138 | cdRNA01-preDia | cdRNA04-Dia-R3  | 29.9249 | 5.99003 | -2.32071 | 0.0001   | 0.0354705 |
| RNA-Seq | Trans-ABySS | XLOC_205428 | S988095:0-1138 | cdRNA04-Dia-R3 | cdRNA05-postDia | 5.99003 | 61.9178 | 3.36972  | 5.00E-05 | 0.0195319 |
| RNA-Seq | Trans-ABySS | XLOC_205428 | S988095:0-1138 | cdRNA03-Dia-R2 | cdRNA05-postDia | 5.42247 | 61.9178 | 3.51333  | 5.00E-05 | 0.0195319 |
| RNA-Seq | Trans-ABySS | XLOC_206524 | S998204:0-684  | cdRNA02-Dia-R1 | cdRNA05-postDia | 8.04763 | 51.2671 | 2.6714   | 5.00E-05 | 0.0195319 |

|         |             |             |                      |                |                 |         |          |          |          |           |
|---------|-------------|-------------|----------------------|----------------|-----------------|---------|----------|----------|----------|-----------|
| RNA-Seq | Trans-ABYSS | XLOC_206524 | S998204:0-684        | cdRNA04-Dia-R3 | cdRNA05-postDia | 7.9154  | 51.2671  | 2.6953   | 5.00E-05 | 0.0195319 |
| RNA-Seq | Trans-ABYSS | XLOC_206524 | S998204:0-684        | cdRNA03-Dia-R2 | cdRNA05-postDia | 6.87694 | 51.2671  | 2.8982   | 5.00E-05 | 0.0195319 |
| RNA-Seq | Trans-ABYSS | XLOC_206524 | S998204:0-684        | cdRNA01-preDia | cdRNA05-postDia | 2.9456  | 51.2671  | 4.1214   | 5.00E-05 | 0.0195319 |
| RNA-Seq | Trans-ABYSS | XLOC_206598 | S998799:0-570        | cdRNA02-Dia-R1 | cdRNA05-postDia | 12.1144 | 66.9927  | 2.46729  | 0.00015  | 0.0374403 |
| RNA-Seq | Trans-ABYSS | XLOC_206598 | S998799:0-570        | cdRNA04-Dia-R3 | cdRNA05-postDia | 8.6312  | 66.9927  | 2.95637  | 5.00E-05 | 0.0195319 |
| RNA-Seq | Trans-ABYSS | XLOC_206598 | S998799:0-570        | cdRNA03-Dia-R2 | cdRNA05-postDia | 8.04385 | 66.9927  | 3.05805  | 5.00E-05 | 0.0195319 |
| RNA-Seq | Trinity     | XLOC_000251 | c100242_g1_i1:1-605  | cdRNA03-Dia-R2 | cdRNA05-postDia | 11.7358 | 76.122   | 2.69739  | 5.00E-05 | 0.0249845 |
| RNA-Seq | Trinity     | XLOC_000251 | c100242_g1_i1:1-605  | cdRNA02-Dia-R1 | cdRNA05-postDia | 10.8618 | 76.122   | 2.80905  | 5.00E-05 | 0.0249845 |
| RNA-Seq | Trinity     | XLOC_000251 | c100242_g1_i1:1-605  | cdRNA04-Dia-R3 | cdRNA05-postDia | 10.6127 | 76.122   | 2.84252  | 5.00E-05 | 0.0249845 |
| RNA-Seq | Trinity     | XLOC_000251 | c100242_g1_i1:1-605  | cdRNA01-preDia | cdRNA05-postDia | 8.59409 | 76.122   | 3.1469   | 5.00E-05 | 0.0249845 |
| RNA-Seq | Trinity     | XLOC_000365 | c100348_g1_i1:0-843  | cdRNA03-Dia-R2 | cdRNA05-postDia | 2.83981 | 18.5241  | 2.70554  | 5.00E-05 | 0.0249845 |
| RNA-Seq | Trinity     | XLOC_000456 | c100434_g1_i1:1-651  | cdRNA03-Dia-R2 | cdRNA05-postDia | 11.3215 | 69.9689  | 2.62765  | 5.00E-05 | 0.0249845 |
| RNA-Seq | Trinity     | XLOC_000745 | c10070_g1_i1:0-630   | cdRNA02-Dia-R1 | cdRNA05-postDia | 1.18754 | 38.5448  | 5.02049  | 5.00E-05 | 0.0249845 |
| RNA-Seq | Trinity     | XLOC_000986 | c100942_g1_i1:0-203  | cdRNA03-Dia-R2 | cdRNA05-postDia | 400.779 | 48.5888  | -3.04411 | 5.00E-05 | 0.0249845 |
| RNA-Seq | Trinity     | XLOC_000986 | c100942_g1_i1:0-203  | cdRNA04-Dia-R3 | cdRNA05-postDia | 387.644 | 48.5888  | -2.99604 | 5.00E-05 | 0.0249845 |
| RNA-Seq | Trinity     | XLOC_001258 | c10119_g1_i1:2-183   | cdRNA02-Dia-R1 | cdRNA05-postDia | 971.644 | 6180.04  | 2.66912  | 5.00E-05 | 0.0249845 |
| RNA-Seq | Trinity     | XLOC_001258 | c10119_g1_i1:2-183   | cdRNA04-Dia-R3 | cdRNA05-postDia | 741.492 | 6180.04  | 3.05911  | 5.00E-05 | 0.0249845 |
| RNA-Seq | Trinity     | XLOC_001258 | c10119_g1_i1:2-183   | cdRNA03-Dia-R2 | cdRNA05-postDia | 630.566 | 6180.04  | 3.2929   | 5.00E-05 | 0.0249845 |
| RNA-Seq | Trinity     | XLOC_001258 | c10119_g1_i1:2-183   | cdRNA01-preDia | cdRNA05-postDia | 351.759 | 6180.04  | 4.13496  | 5.00E-05 | 0.0249845 |
| RNA-Seq | Trinity     | XLOC_001277 | c101217_g1_i1:0-796  | cdRNA03-Dia-R2 | cdRNA05-postDia | 1.73254 | 13.3298  | 2.9437   | 5.00E-05 | 0.0249845 |
| RNA-Seq | Trinity     | XLOC_001753 | c10169_g1_i1:0-819   | cdRNA01-preDia | cdRNA04-Dia-R3  | 28.2056 | 0.986095 | -4.83811 | 5.00E-05 | 0.0249845 |
| RNA-Seq | Trinity     | XLOC_001753 | c10169_g1_i1:0-819   | cdRNA01-preDia | cdRNA03-Dia-R2  | 28.2056 | 1.47531  | -4.25689 | 5.00E-05 | 0.0249845 |
| RNA-Seq | Trinity     | XLOC_001773 | c10171_g1_i1:0-6021  | cdRNA02-Dia-R1 | cdRNA03-Dia-R2  | 4961.54 | 4595.74  | -0.11049 | 5.00E-05 | 0.0249845 |
| RNA-Seq | Trinity     | XLOC_001773 | c10171_g1_i1:0-6021  | cdRNA01-preDia | cdRNA02-Dia-R1  | 4587.47 | 4961.54  | 0.11309  | 5.00E-05 | 0.0249845 |
| RNA-Seq | Trinity     | XLOC_001836 | c101782_g1_i1:0-584  | cdRNA03-Dia-R2 | cdRNA05-postDia | 2.59527 | 23.7029  | 3.19111  | 5.00E-05 | 0.0249845 |
| RNA-Seq | Trinity     | XLOC_002114 | c10204_g2_i1:0-848   | cdRNA01-preDia | cdRNA04-Dia-R3  | 4.90851 | 24.3074  | 2.30804  | 0.0001   | 0.0432976 |
| RNA-Seq | Trinity     | XLOC_002114 | c10204_g2_i1:0-848   | cdRNA01-preDia | cdRNA03-Dia-R2  | 4.90851 | 25.4211  | 2.37267  | 0.0001   | 0.0432976 |
| RNA-Seq | Trinity     | XLOC_002389 | c102329_g1_i1:0-415  | cdRNA03-Dia-R2 | cdRNA05-postDia | 4.48637 | 36.8272  | 3.03715  | 5.00E-05 | 0.0249845 |
| RNA-Seq | Trinity     | XLOC_002390 | c10232_g1_i1:4-389   | cdRNA01-preDia | cdRNA05-postDia | 7.19678 | 45.0936  | 2.6475   | 0.0001   | 0.0432976 |
| RNA-Seq | Trinity     | XLOC_002472 | c10240_g1_i2:29-1014 | cdRNA04-Dia-R3 | cdRNA05-postDia | 148.652 | 18.9324  | -2.97301 | 5.00E-05 | 0.0249845 |
| RNA-Seq | Trinity     | XLOC_002472 | c10240_g1_i2:29-1014 | cdRNA03-Dia-R2 | cdRNA05-postDia | 136.53  | 18.9324  | -2.85029 | 5.00E-05 | 0.0249845 |
| RNA-Seq | Trinity     | XLOC_002472 | c10240_g1_i2:29-1014 | cdRNA01-preDia | cdRNA05-postDia | 125.826 | 18.9324  | -2.7325  | 5.00E-05 | 0.0249845 |
| RNA-Seq | Trinity     | XLOC_002473 | c10240_g1_i3:19-975  | cdRNA02-Dia-R1 | cdRNA05-postDia | 15.473  | 193.975  | 3.64805  | 5.00E-05 | 0.0249845 |
| RNA-Seq | Trinity     | XLOC_002473 | c10240_g1_i3:19-975  | cdRNA01-preDia | cdRNA05-postDia | 7.46135 | 193.975  | 4.70029  | 5.00E-05 | 0.0249845 |
| RNA-Seq | Trinity     | XLOC_002473 | c10240_g1_i3:19-975  | cdRNA04-Dia-R3 | cdRNA05-postDia | 7.35886 | 193.975  | 4.72025  | 5.00E-05 | 0.0249845 |
| RNA-Seq | Trinity     | XLOC_002473 | c10240_g1_i3:19-975  | cdRNA03-Dia-R2 | cdRNA05-postDia | 7.08189 | 193.975  | 4.7756   | 5.00E-05 | 0.0249845 |
| RNA-Seq | Trinity     | XLOC_002706 | c10263_g1_i1:0-1854  | cdRNA01-preDia | cdRNA05-postDia | 10.0342 | 64.2035  | 2.67773  | 5.00E-05 | 0.0249845 |
| RNA-Seq | Trinity     | XLOC_002899 | c10282_g1_i1:0-1786  | cdRNA01-preDia | cdRNA05-postDia | 5.42661 | 35.7337  | 2.71916  | 5.00E-05 | 0.0249845 |
| RNA-Seq | Trinity     | XLOC_002900 | c10282_g1_i2:0-824   | cdRNA01-preDia | cdRNA05-postDia | 4.33374 | 29.8912  | 2.78604  | 5.00E-05 | 0.0249845 |
| RNA-Seq | Trinity     | XLOC_003211 | c10313_g1_i1:0-635   | cdRNA01-preDia | cdRNA02-Dia-R1  | 3.48376 | 24.58    | 2.81877  | 5.00E-05 | 0.0249845 |
| RNA-Seq | Trinity     | XLOC_003211 | c10313_g1_i1:0-635   | cdRNA03-Dia-R2 | cdRNA05-postDia | 13.0884 | 98.7579  | 2.91561  | 5.00E-05 | 0.0249845 |
| RNA-Seq | Trinity     | XLOC_003211 | c10313_g1_i1:0-635   | cdRNA04-Dia-R3 | cdRNA05-postDia | 10.7288 | 98.7579  | 3.2024   | 5.00E-05 | 0.0249845 |
| RNA-Seq | Trinity     | XLOC_003211 | c10313_g1_i1:0-635   | cdRNA01-preDia | cdRNA05-postDia | 3.48376 | 98.7579  | 4.82518  | 5.00E-05 | 0.0249845 |
| RNA-Seq | Trinity     | XLOC_003213 | c10313_g1_i4:0-636   | cdRNA02-Dia-R1 | cdRNA05-postDia | 11.0216 | 78.7865  | 2.83761  | 5.00E-05 | 0.0249845 |
| RNA-Seq | Trinity     | XLOC_003213 | c10313_g1_i4:0-636   | cdRNA04-Dia-R3 | cdRNA05-postDia | 7.28223 | 78.7865  | 3.4355   | 5.00E-05 | 0.0249845 |
| RNA-Seq | Trinity     | XLOC_003213 | c10313_g1_i4:0-636   | cdRNA03-Dia-R2 | cdRNA05-postDia | 6.93997 | 78.7865  | 3.50495  | 5.00E-05 | 0.0249845 |
| RNA-Seq | Trinity     | XLOC_003213 | c10313_g1_i4:0-636   | cdRNA01-preDia | cdRNA05-postDia | 3.01836 | 78.7865  | 4.70611  | 5.00E-05 | 0.0249845 |



|         |         |             |                     |                |                 |          |         |          |          |           |
|---------|---------|-------------|---------------------|----------------|-----------------|----------|---------|----------|----------|-----------|
| RNA-Seq | Trinity | XLOC_003369 | c10329_g1_i1:0-677  | cdRNA01-preDia | cdRNA05-postDia | 7.68545  | 40.6972 | 2.40473  | 0.0001   | 0.0432976 |
| RNA-Seq | Trinity | XLOC_003369 | c10329_g1_i1:0-677  | cdRNA02-Dia-R1 | cdRNA05-postDia | 2.07617  | 40.6972 | 4.29293  | 5.00E-05 | 0.0249845 |
| RNA-Seq | Trinity | XLOC_003388 | c103319_g1_i1:0-288 | cdRNA04-Dia-R3 | cdRNA05-postDia | 215.637  | 24.1024 | -3.16135 | 5.00E-05 | 0.0249845 |
| RNA-Seq | Trinity | XLOC_003388 | c103319_g1_i1:0-288 | cdRNA03-Dia-R2 | cdRNA05-postDia | 212.502  | 24.1024 | -3.14022 | 0.0001   | 0.0432976 |
| RNA-Seq | Trinity | XLOC_003865 | c1037_g1_i1:1-1419  | cdRNA04-Dia-R3 | cdRNA05-postDia | 81.458   | 13.6243 | -2.57987 | 5.00E-05 | 0.0249845 |
| RNA-Seq | Trinity | XLOC_003865 | c1037_g1_i1:1-1419  | cdRNA03-Dia-R2 | cdRNA05-postDia | 77.1758  | 13.6243 | -2.50196 | 5.00E-05 | 0.0249845 |
| RNA-Seq | Trinity | XLOC_003909 | c10384_g1_i2:0-353  | cdRNA03-Dia-R2 | cdRNA05-postDia | 3.95237  | 89.7112 | 4.5045   | 5.00E-05 | 0.0249845 |
| RNA-Seq | Trinity | XLOC_003909 | c10384_g1_i2:0-353  | cdRNA04-Dia-R3 | cdRNA05-postDia | 3.03802  | 89.7112 | 4.88409  | 5.00E-05 | 0.0249845 |
| RNA-Seq | Trinity | XLOC_003990 | c10392_g1_i1:0-2087 | cdRNA03-Dia-R2 | cdRNA05-postDia | 4.39953  | 36.3843 | 3.04789  | 5.00E-05 | 0.0249845 |
| RNA-Seq | Trinity | XLOC_003990 | c10392_g1_i1:0-2087 | cdRNA02-Dia-R1 | cdRNA05-postDia | 4.31451  | 36.3843 | 3.07604  | 5.00E-05 | 0.0249845 |
| RNA-Seq | Trinity | XLOC_003990 | c10392_g1_i1:0-2087 | cdRNA04-Dia-R3 | cdRNA05-postDia | 3.90509  | 36.3843 | 3.21988  | 5.00E-05 | 0.0249845 |
| RNA-Seq | Trinity | XLOC_003990 | c10392_g1_i1:0-2087 | cdRNA01-preDia | cdRNA05-postDia | 1.76271  | 36.3843 | 4.36745  | 5.00E-05 | 0.0249845 |
| RNA-Seq | Trinity | XLOC_004062 | c104001_g1_i1:0-219 | cdRNA01-preDia | cdRNA05-postDia | 14.4482  | 336.221 | 4.54045  | 5.00E-05 | 0.0249845 |
| RNA-Seq | Trinity | XLOC_004218 | c10415_g1_i1:0-1844 | cdRNA02-Dia-R1 | cdRNA05-postDia | 16.629   | 1.21703 | -3.77226 | 5.00E-05 | 0.0249845 |
| RNA-Seq | Trinity | XLOC_004218 | c10415_g1_i1:0-1844 | cdRNA04-Dia-R3 | cdRNA05-postDia | 15.0619  | 1.21703 | -3.62946 | 5.00E-05 | 0.0249845 |
| RNA-Seq | Trinity | XLOC_004218 | c10415_g1_i1:0-1844 | cdRNA03-Dia-R2 | cdRNA05-postDia | 14.8211  | 1.21703 | -3.60621 | 5.00E-05 | 0.0249845 |
| RNA-Seq | Trinity | XLOC_004218 | c10415_g1_i1:0-1844 | cdRNA01-preDia | cdRNA05-postDia | 14.1029  | 1.21703 | -3.53455 | 5.00E-05 | 0.0249845 |
| RNA-Seq | Trinity | XLOC_004264 | c10420_g1_i1:0-1664 | cdRNA02-Dia-R1 | cdRNA05-postDia | 5.25878  | 45.0966 | 3.10022  | 5.00E-05 | 0.0249845 |
| RNA-Seq | Trinity | XLOC_004264 | c10420_g1_i1:0-1664 | cdRNA03-Dia-R2 | cdRNA05-postDia | 4.37723  | 45.0966 | 3.36493  | 5.00E-05 | 0.0249845 |
| RNA-Seq | Trinity | XLOC_004264 | c10420_g1_i1:0-1664 | cdRNA04-Dia-R3 | cdRNA05-postDia | 4.024    | 45.0966 | 3.48632  | 5.00E-05 | 0.0249845 |
| RNA-Seq | Trinity | XLOC_004264 | c10420_g1_i1:0-1664 | cdRNA01-preDia | cdRNA05-postDia | 1.65093  | 45.0966 | 4.77167  | 5.00E-05 | 0.0249845 |
| RNA-Seq | Trinity | XLOC_004853 | c104838_g1_i1:2-298 | cdRNA01-preDia | cdRNA05-postDia | 134.184  | 4.96674 | -4.75577 | 5.00E-05 | 0.0249845 |
| RNA-Seq | Trinity | XLOC_004853 | c104838_g1_i1:2-298 | cdRNA01-preDia | cdRNA02-Dia-R1  | 134.184  | 5.56281 | -4.59226 | 5.00E-05 | 0.0249845 |
| RNA-Seq | Trinity | XLOC_004853 | c104838_g1_i1:2-298 | cdRNA01-preDia | cdRNA03-Dia-R2  | 134.184  | 7.78384 | -4.10759 | 5.00E-05 | 0.0249845 |
| RNA-Seq | Trinity | XLOC_004853 | c104838_g1_i1:2-298 | cdRNA01-preDia | cdRNA04-Dia-R3  | 134.184  | 8.26612 | -4.02086 | 5.00E-05 | 0.0249845 |
| RNA-Seq | Trinity | XLOC_005006 | c105018_g1_i1:2-308 | cdRNA01-preDia | cdRNA05-postDia | 12.3876  | 90.8703 | 2.87491  | 5.00E-05 | 0.0249845 |
| RNA-Seq | Trinity | XLOC_005006 | c105018_g1_i1:2-308 | cdRNA02-Dia-R1 | cdRNA05-postDia | 7.35048  | 90.8703 | 3.6279   | 0.0001   | 0.0432976 |
| RNA-Seq | Trinity | XLOC_005196 | c10570_g1_i3:0-462  | cdRNA03-Dia-R2 | cdRNA05-postDia | 7.03327  | 41.0895 | 2.5465   | 5.00E-05 | 0.0249845 |
| RNA-Seq | Trinity | XLOC_005196 | c10570_g1_i3:0-462  | cdRNA04-Dia-R3 | cdRNA05-postDia | 5.43555  | 41.0895 | 2.91827  | 5.00E-05 | 0.0249845 |
| RNA-Seq | Trinity | XLOC_005196 | c10570_g1_i3:0-462  | cdRNA01-preDia | cdRNA05-postDia | 4.13501  | 41.0895 | 3.31281  | 0.0001   | 0.0432976 |
| RNA-Seq | Trinity | XLOC_005264 | c10620_g1_i1:0-2648 | cdRNA02-Dia-R1 | cdRNA05-postDia | 1.14458  | 72.1444 | 5.978    | 5.00E-05 | 0.0249845 |
| RNA-Seq | Trinity | XLOC_005264 | c10620_g1_i1:0-2648 | cdRNA04-Dia-R3 | cdRNA05-postDia | 0.418739 | 72.1444 | 7.42869  | 5.00E-05 | 0.0249845 |
| RNA-Seq | Trinity | XLOC_005264 | c10620_g1_i1:0-2648 | cdRNA03-Dia-R2 | cdRNA05-postDia | 0.38739  | 72.1444 | 7.54096  | 5.00E-05 | 0.0249845 |
| RNA-Seq | Trinity | XLOC_005384 | c10701_g2_i3:0-264  | cdRNA01-preDia | cdRNA05-postDia | 13.6577  | 150.959 | 3.46637  | 5.00E-05 | 0.0249845 |
| RNA-Seq | Trinity | XLOC_005388 | c10704_g1_i2:0-883  | cdRNA01-preDia | cdRNA02-Dia-R1  | 0.814713 | 15.6025 | 4.25934  | 0.0001   | 0.0432976 |
| RNA-Seq | Trinity | XLOC_005388 | c10704_g1_i2:0-883  | cdRNA01-preDia | cdRNA05-postDia | 0.814713 | 33.0462 | 5.34205  | 5.00E-05 | 0.0249845 |
| RNA-Seq | Trinity | XLOC_005395 | c10708_g1_i1:0-942  | cdRNA03-Dia-R2 | cdRNA05-postDia | 9.6751   | 45.6875 | 2.23945  | 5.00E-05 | 0.0249845 |
| RNA-Seq | Trinity | XLOC_005395 | c10708_g1_i1:0-942  | cdRNA01-preDia | cdRNA05-postDia | 9.04851  | 45.6875 | 2.33605  | 5.00E-05 | 0.0249845 |
| RNA-Seq | Trinity | XLOC_005395 | c10708_g1_i1:0-942  | cdRNA04-Dia-R3 | cdRNA05-postDia | 8.52565  | 45.6875 | 2.42192  | 0.0001   | 0.0432976 |
| RNA-Seq | Trinity | XLOC_005400 | c10710_g1_i2:9-913  | cdRNA03-Dia-R2 | cdRNA05-postDia | 5.35375  | 46.915  | 3.13143  | 5.00E-05 | 0.0249845 |
| RNA-Seq | Trinity | XLOC_005400 | c10710_g1_i2:9-913  | cdRNA04-Dia-R3 | cdRNA05-postDia | 4.60252  | 46.915  | 3.34955  | 5.00E-05 | 0.0249845 |
| RNA-Seq | Trinity | XLOC_005402 | c10710_g2_i1:3-239  | cdRNA02-Dia-R1 | cdRNA05-postDia | 184.682  | 18.7132 | -3.30292 | 5.00E-05 | 0.0249845 |
| RNA-Seq | Trinity | XLOC_005455 | c10739_g1_i1:0-2959 | cdRNA01-preDia | cdRNA04-Dia-R3  | 5.72274  | 41.0818 | 2.84372  | 5.00E-05 | 0.0249845 |
| RNA-Seq | Trinity | XLOC_005455 | c10739_g1_i1:0-2959 | cdRNA01-preDia | cdRNA03-Dia-R2  | 5.72274  | 43.9741 | 2.94188  | 5.00E-05 | 0.0249845 |
| RNA-Seq | Trinity | XLOC_005463 | c10744_g2_i1:5-219  | cdRNA01-preDia | cdRNA05-postDia | 17.8535  | 298.254 | 4.06226  | 0.0001   | 0.0432976 |
| RNA-Seq | Trinity | XLOC_005464 | c10746_g1_i1:0-1065 | cdRNA02-Dia-R1 | cdRNA04-Dia-R3  | 13.1685  | 1.58481 | -3.05472 | 5.00E-05 | 0.0249845 |
| RNA-Seq | Trinity | XLOC_005464 | c10746_g1_i1:0-1065 | cdRNA02-Dia-R1 | cdRNA05-postDia | 13.1685  | 77.5347 | 2.55775  | 5.00E-05 | 0.0249845 |

|         |         |             |                      |                |                 |         |         |          |          |           |
|---------|---------|-------------|----------------------|----------------|-----------------|---------|---------|----------|----------|-----------|
| RNA-Seq | Trinity | XLOC_005464 | c10746_g1_i1:0-1065  | cdRNA01-preDia | cdRNA05-postDia | 11.3355 | 77.5347 | 2.77399  | 5.00E-05 | 0.0249845 |
| RNA-Seq | Trinity | XLOC_005464 | c10746_g1_i1:0-1065  | cdRNA03-Dia-R2 | cdRNA05-postDia | 1.87852 | 77.5347 | 5.36718  | 5.00E-05 | 0.0249845 |
| RNA-Seq | Trinity | XLOC_005464 | c10746_g1_i1:0-1065  | cdRNA04-Dia-R3 | cdRNA05-postDia | 1.58481 | 77.5347 | 5.61246  | 5.00E-05 | 0.0249845 |
| RNA-Seq | Trinity | XLOC_005473 | c10755_g1_i1:13-2004 | cdRNA01-preDia | cdRNA05-postDia | 35.2464 | 330.887 | 3.23079  | 5.00E-05 | 0.0249845 |
| RNA-Seq | Trinity | XLOC_005473 | c10755_g1_i1:13-2004 | cdRNA03-Dia-R2 | cdRNA05-postDia | 13.8193 | 330.887 | 4.58158  | 5.00E-05 | 0.0249845 |
| RNA-Seq | Trinity | XLOC_005473 | c10755_g1_i1:13-2004 | cdRNA04-Dia-R3 | cdRNA05-postDia | 13.7658 | 330.887 | 4.58718  | 5.00E-05 | 0.0249845 |
| RNA-Seq | Trinity | XLOC_005474 | c10755_g2_i1:3-2262  | cdRNA02-Dia-R1 | cdRNA05-postDia | 10.8175 | 178.739 | 4.04641  | 5.00E-05 | 0.0249845 |
| RNA-Seq | Trinity | XLOC_005474 | c10755_g2_i1:3-2262  | cdRNA01-preDia | cdRNA05-postDia | 5.24931 | 178.739 | 5.08958  | 5.00E-05 | 0.0249845 |
| RNA-Seq | Trinity | XLOC_005474 | c10755_g2_i1:3-2262  | cdRNA03-Dia-R2 | cdRNA05-postDia | 3.70496 | 178.739 | 5.59225  | 5.00E-05 | 0.0249845 |
| RNA-Seq | Trinity | XLOC_005474 | c10755_g2_i1:3-2262  | cdRNA04-Dia-R3 | cdRNA05-postDia | 3.44913 | 178.739 | 5.69547  | 5.00E-05 | 0.0249845 |
| RNA-Seq | Trinity | XLOC_005475 | c10755_g2_i2:0-2532  | cdRNA01-preDia | cdRNA05-postDia | 13.2902 | 150.468 | 3.50103  | 5.00E-05 | 0.0249845 |
| RNA-Seq | Trinity | XLOC_005475 | c10755_g2_i2:0-2532  | cdRNA03-Dia-R2 | cdRNA05-postDia | 6.15123 | 150.468 | 4.61244  | 5.00E-05 | 0.0249845 |
| RNA-Seq | Trinity | XLOC_005475 | c10755_g2_i2:0-2532  | cdRNA04-Dia-R3 | cdRNA05-postDia | 5.87767 | 150.468 | 4.67807  | 5.00E-05 | 0.0249845 |
| RNA-Seq | Trinity | XLOC_005480 | c10757_g2_i1:0-5591  | cdRNA01-preDia | cdRNA03-Dia-R2  | 25.1741 | 193.695 | 2.94378  | 5.00E-05 | 0.0249845 |
| RNA-Seq | Trinity | XLOC_005501 | c10770_g1_i2:40-1984 | cdRNA02-Dia-R1 | cdRNA05-postDia | 8.12388 | 68.6476 | 3.07897  | 5.00E-05 | 0.0249845 |
| RNA-Seq | Trinity | XLOC_005501 | c10770_g1_i2:40-1984 | cdRNA01-preDia | cdRNA05-postDia | 3.47451 | 68.6476 | 4.30433  | 5.00E-05 | 0.0249845 |
| RNA-Seq | Trinity | XLOC_005501 | c10770_g1_i2:40-1984 | cdRNA03-Dia-R2 | cdRNA05-postDia | 3.37812 | 68.6476 | 4.34492  | 5.00E-05 | 0.0249845 |
| RNA-Seq | Trinity | XLOC_005501 | c10770_g1_i2:40-1984 | cdRNA04-Dia-R3 | cdRNA05-postDia | 2.94079 | 68.6476 | 4.54493  | 5.00E-05 | 0.0249845 |
| RNA-Seq | Trinity | XLOC_005593 | c10821_g1_i1:0-1680  | cdRNA01-preDia | cdRNA05-postDia | 7.60296 | 40.3684 | 2.40859  | 5.00E-05 | 0.0249845 |
| RNA-Seq | Trinity | XLOC_005593 | c10821_g1_i1:0-1680  | cdRNA01-preDia | cdRNA04-Dia-R3  | 7.60296 | 65.5607 | 3.1082   | 5.00E-05 | 0.0249845 |
| RNA-Seq | Trinity | XLOC_005593 | c10821_g1_i1:0-1680  | cdRNA01-preDia | cdRNA03-Dia-R2  | 7.60296 | 65.7218 | 3.11174  | 5.00E-05 | 0.0249845 |
| RNA-Seq | Trinity | XLOC_005595 | c10823_g2_i1:0-1937  | cdRNA03-Dia-R2 | cdRNA05-postDia | 539.54  | 70.4887 | -2.93627 | 5.00E-05 | 0.0249845 |
| RNA-Seq | Trinity | XLOC_005595 | c10823_g2_i1:0-1937  | cdRNA04-Dia-R3 | cdRNA05-postDia | 539.005 | 70.4887 | -2.93483 | 5.00E-05 | 0.0249845 |
| RNA-Seq | Trinity | XLOC_005595 | c10823_g2_i1:0-1937  | cdRNA01-preDia | cdRNA02-Dia-R1  | 12.6773 | 404.984 | 4.99754  | 5.00E-05 | 0.0249845 |
| RNA-Seq | Trinity | XLOC_005595 | c10823_g2_i1:0-1937  | cdRNA01-preDia | cdRNA04-Dia-R3  | 12.6773 | 539.005 | 5.40998  | 5.00E-05 | 0.0249845 |
| RNA-Seq | Trinity | XLOC_005595 | c10823_g2_i1:0-1937  | cdRNA01-preDia | cdRNA03-Dia-R2  | 12.6773 | 539.54  | 5.41141  | 5.00E-05 | 0.0249845 |
| RNA-Seq | Trinity | XLOC_005653 | c10879_g1_i1:0-1256  | cdRNA02-Dia-R1 | cdRNA04-Dia-R3  | 9.92906 | 1.76546 | -2.49161 | 0.0001   | 0.0432976 |
| RNA-Seq | Trinity | XLOC_005653 | c10879_g1_i1:0-1256  | cdRNA02-Dia-R1 | cdRNA05-postDia | 9.92906 | 60.5785 | 2.60908  | 5.00E-05 | 0.0249845 |
| RNA-Seq | Trinity | XLOC_005653 | c10879_g1_i1:0-1256  | cdRNA01-preDia | cdRNA05-postDia | 4.31948 | 60.5785 | 3.80988  | 5.00E-05 | 0.0249845 |
| RNA-Seq | Trinity | XLOC_005653 | c10879_g1_i1:0-1256  | cdRNA04-Dia-R3 | cdRNA05-postDia | 1.76546 | 60.5785 | 5.10069  | 5.00E-05 | 0.0249845 |
| RNA-Seq | Trinity | XLOC_005653 | c10879_g1_i1:0-1256  | cdRNA03-Dia-R2 | cdRNA05-postDia | 1.42496 | 60.5785 | 5.40981  | 5.00E-05 | 0.0249845 |
| RNA-Seq | Trinity | XLOC_005792 | c11008_g1_i1:1-967   | cdRNA04-Dia-R3 | cdRNA05-postDia | 18.0065 | 2.35365 | -2.93555 | 5.00E-05 | 0.0249845 |
| RNA-Seq | Trinity | XLOC_005792 | c11008_g1_i1:1-967   | cdRNA03-Dia-R2 | cdRNA05-postDia | 16.5664 | 2.35365 | -2.81529 | 5.00E-05 | 0.0249845 |
| RNA-Seq | Trinity | XLOC_005833 | c11046_g1_i1:0-1195  | cdRNA02-Dia-R1 | cdRNA05-postDia | 6.57638 | 36.7183 | 2.48113  | 0.0001   | 0.0432976 |
| RNA-Seq | Trinity | XLOC_005833 | c11046_g1_i1:0-1195  | cdRNA03-Dia-R2 | cdRNA05-postDia | 6.0905  | 36.7183 | 2.59187  | 5.00E-05 | 0.0249845 |
| RNA-Seq | Trinity | XLOC_005833 | c11046_g1_i1:0-1195  | cdRNA04-Dia-R3 | cdRNA05-postDia | 5.85188 | 36.7183 | 2.64953  | 5.00E-05 | 0.0249845 |
| RNA-Seq | Trinity | XLOC_005957 | c11163_g1_i1:40-622  | cdRNA04-Dia-R3 | cdRNA05-postDia | 80.8186 | 554.693 | 2.77893  | 5.00E-05 | 0.0249845 |
| RNA-Seq | Trinity | XLOC_005957 | c11163_g1_i1:40-622  | cdRNA03-Dia-R2 | cdRNA05-postDia | 79.418  | 554.693 | 2.80415  | 5.00E-05 | 0.0249845 |
| RNA-Seq | Trinity | XLOC_005982 | c11188_g1_i1:3-737   | cdRNA03-Dia-R2 | cdRNA05-postDia | 37.2155 | 194.085 | 2.38271  | 0.0001   | 0.0432976 |
| RNA-Seq | Trinity | XLOC_006090 | c11287_g1_i1:0-2242  | cdRNA01-preDia | cdRNA03-Dia-R2  | 7.46463 | 75.5496 | 3.33928  | 5.00E-05 | 0.0249845 |
| RNA-Seq | Trinity | XLOC_006090 | c11287_g1_i1:0-2242  | cdRNA01-preDia | cdRNA04-Dia-R3  | 7.46463 | 77.6484 | 3.37881  | 5.00E-05 | 0.0249845 |
| RNA-Seq | Trinity | XLOC_006344 | c11518_g1_i1:0-1010  | cdRNA04-Dia-R3 | cdRNA05-postDia | 5.07884 | 25.2185 | 2.31191  | 0.0001   | 0.0432976 |
| RNA-Seq | Trinity | XLOC_006344 | c11518_g1_i1:0-1010  | cdRNA03-Dia-R2 | cdRNA05-postDia | 4.69862 | 25.2185 | 2.42417  | 5.00E-05 | 0.0249845 |
| RNA-Seq | Trinity | XLOC_006353 | c11526_g1_i1:0-1564  | cdRNA03-Dia-R2 | cdRNA05-postDia | 6.23643 | 0.70333 | -3.14845 | 5.00E-05 | 0.0249845 |
| RNA-Seq | Trinity | XLOC_006353 | c11526_g1_i1:0-1564  | cdRNA04-Dia-R3 | cdRNA05-postDia | 5.96422 | 0.70333 | -3.08406 | 5.00E-05 | 0.0249845 |
| RNA-Seq | Trinity | XLOC_006365 | c11539_g1_i1:0-1869  | cdRNA02-Dia-R1 | cdRNA04-Dia-R3  | 11.6713 | 1.61631 | -2.85219 | 5.00E-05 | 0.0249845 |
| RNA-Seq | Trinity | XLOC_006365 | c11539_g1_i1:0-1869  | cdRNA02-Dia-R1 | cdRNA03-Dia-R2  | 11.6713 | 1.75329 | -2.73482 | 5.00E-05 | 0.0249845 |

|         |         |             |                     |                |                 |         |         |          |          |           |
|---------|---------|-------------|---------------------|----------------|-----------------|---------|---------|----------|----------|-----------|
| RNA-Seq | Trinity | XLOC_006768 | c1190_g1_i1:0-839   | cdRNA01-preDia | cdRNA04-Dia-R3  | 18.6678 | 3.10387 | -2.58841 | 5.00E-05 | 0.0249845 |
| RNA-Seq | Trinity | XLOC_006768 | c1190_g1_i1:0-839   | cdRNA04-Dia-R3 | cdRNA05-postDia | 3.10387 | 23.5364 | 2.92275  | 5.00E-05 | 0.0249845 |
| RNA-Seq | Trinity | XLOC_006819 | c11956_g2_i1:12-389 | cdRNA02-Dia-R1 | cdRNA05-postDia | 29.3691 | 181.024 | 2.62382  | 5.00E-05 | 0.0249845 |
| RNA-Seq | Trinity | XLOC_006819 | c11956_g2_i1:12-389 | cdRNA01-preDia | cdRNA05-postDia | 11.6304 | 181.024 | 3.96021  | 5.00E-05 | 0.0249845 |
| RNA-Seq | Trinity | XLOC_006902 | c12030_g1_i1:0-1353 | cdRNA03-Dia-R2 | cdRNA05-postDia | 111.206 | 19.8409 | -2.48668 | 0.0001   | 0.0432976 |
| RNA-Seq | Trinity | XLOC_006983 | c12107_g1_i1:0-475  | cdRNA03-Dia-R2 | cdRNA05-postDia | 3.49351 | 25.2947 | 2.85609  | 0.0001   | 0.0432976 |
| RNA-Seq | Trinity | XLOC_007097 | c12215_g1_i1:0-1141 | cdRNA02-Dia-R1 | cdRNA05-postDia | 4.00173 | 22.2883 | 2.47759  | 5.00E-05 | 0.0249845 |
| RNA-Seq | Trinity | XLOC_007097 | c12215_g1_i1:0-1141 | cdRNA03-Dia-R2 | cdRNA05-postDia | 3.57861 | 22.2883 | 2.63882  | 5.00E-05 | 0.0249845 |
| RNA-Seq | Trinity | XLOC_007097 | c12215_g1_i1:0-1141 | cdRNA04-Dia-R3 | cdRNA05-postDia | 3.03388 | 22.2883 | 2.87705  | 5.00E-05 | 0.0249845 |
| RNA-Seq | Trinity | XLOC_007218 | c12324_g1_i1:0-716  | cdRNA04-Dia-R3 | cdRNA05-postDia | 2.44296 | 20.083  | 3.03928  | 0.0001   | 0.0432976 |
| RNA-Seq | Trinity | XLOC_007218 | c12324_g1_i1:0-716  | cdRNA03-Dia-R2 | cdRNA05-postDia | 2.38848 | 20.083  | 3.07181  | 0.0001   | 0.0432976 |
| RNA-Seq | Trinity | XLOC_007218 | c12324_g1_i1:0-716  | cdRNA02-Dia-R1 | cdRNA05-postDia | 1.51117 | 20.083  | 3.73224  | 0.0001   | 0.0432976 |
| RNA-Seq | Trinity | XLOC_007218 | c12324_g1_i1:0-716  | cdRNA01-preDia | cdRNA05-postDia | 1.15762 | 20.083  | 4.11675  | 5.00E-05 | 0.0249845 |
| RNA-Seq | Trinity | XLOC_007437 | c12527_g1_i1:0-1834 | cdRNA03-Dia-R2 | cdRNA05-postDia | 11.2781 | 2.1517  | -2.38997 | 5.00E-05 | 0.0249845 |
| RNA-Seq | Trinity | XLOC_007493 | c12580_g1_i1:1-682  | cdRNA02-Dia-R1 | cdRNA05-postDia | 16.5325 | 82.4666 | 2.31851  | 5.00E-05 | 0.0249845 |
| RNA-Seq | Trinity | XLOC_007493 | c12580_g1_i1:1-682  | cdRNA03-Dia-R2 | cdRNA05-postDia | 16.4575 | 82.4666 | 2.32506  | 5.00E-05 | 0.0249845 |
| RNA-Seq | Trinity | XLOC_007641 | c12717_g1_i1:0-585  | cdRNA04-Dia-R3 | cdRNA05-postDia | 87.9419 | 15.4815 | -2.50601 | 5.00E-05 | 0.0249845 |
| RNA-Seq | Trinity | XLOC_007641 | c12717_g1_i1:0-585  | cdRNA03-Dia-R2 | cdRNA05-postDia | 83.4519 | 15.4815 | -2.4304  | 0.0001   | 0.0432976 |
| RNA-Seq | Trinity | XLOC_007658 | c12732_g1_i1:0-1618 | cdRNA01-preDia | cdRNA03-Dia-R2  | 16.8787 | 2.95729 | -2.51286 | 5.00E-05 | 0.0249845 |
| RNA-Seq | Trinity | XLOC_007658 | c12732_g1_i1:0-1618 | cdRNA01-preDia | cdRNA04-Dia-R3  | 16.8787 | 3.24351 | -2.37957 | 5.00E-05 | 0.0249845 |
| RNA-Seq | Trinity | XLOC_007658 | c12732_g1_i1:0-1618 | cdRNA03-Dia-R2 | cdRNA05-postDia | 2.95729 | 14.5441 | 2.29809  | 5.00E-05 | 0.0249845 |
| RNA-Seq | Trinity | XLOC_007800 | c12864_g1_i1:0-1669 | cdRNA03-Dia-R2 | cdRNA05-postDia | 14.9449 | 2.66609 | -2.48685 | 5.00E-05 | 0.0249845 |
| RNA-Seq | Trinity | XLOC_007800 | c12864_g1_i1:0-1669 | cdRNA04-Dia-R3 | cdRNA05-postDia | 14.437  | 2.66609 | -2.43697 | 5.00E-05 | 0.0249845 |
| RNA-Seq | Trinity | XLOC_007998 | c13050_g1_i1:0-218  | cdRNA04-Dia-R3 | cdRNA05-postDia | 47.2502 | 315.014 | 2.73702  | 5.00E-05 | 0.0249845 |
| RNA-Seq | Trinity | XLOC_007998 | c13050_g1_i1:0-218  | cdRNA02-Dia-R1 | cdRNA05-postDia | 33.9401 | 315.014 | 3.21435  | 5.00E-05 | 0.0249845 |
| RNA-Seq | Trinity | XLOC_008085 | c13134_g1_i1:0-1226 | cdRNA04-Dia-R3 | cdRNA05-postDia | 4.45049 | 27.8051 | 2.64331  | 5.00E-05 | 0.0249845 |
| RNA-Seq | Trinity | XLOC_008085 | c13134_g1_i1:0-1226 | cdRNA03-Dia-R2 | cdRNA05-postDia | 4.36177 | 27.8051 | 2.67236  | 5.00E-05 | 0.0249845 |
| RNA-Seq | Trinity | XLOC_008085 | c13134_g1_i1:0-1226 | cdRNA02-Dia-R1 | cdRNA05-postDia | 3.26125 | 27.8051 | 3.09185  | 5.00E-05 | 0.0249845 |
| RNA-Seq | Trinity | XLOC_008461 | c13487_g1_i1:0-1057 | cdRNA04-Dia-R3 | cdRNA05-postDia | 21.1512 | 3.73788 | -2.50045 | 0.0001   | 0.0432976 |
| RNA-Seq | Trinity | XLOC_008548 | c13572_g1_i1:0-1060 | cdRNA01-preDia | cdRNA03-Dia-R2  | 17.0334 | 1.52081 | -3.48545 | 5.00E-05 | 0.0249845 |
| RNA-Seq | Trinity | XLOC_008548 | c13572_g1_i1:0-1060 | cdRNA03-Dia-R2 | cdRNA05-postDia | 1.52081 | 11.8727 | 2.96474  | 5.00E-05 | 0.0249845 |
| RNA-Seq | Trinity | XLOC_008548 | c13572_g1_i1:0-1060 | cdRNA04-Dia-R3 | cdRNA05-postDia | 1.37266 | 11.8727 | 3.1126   | 0.0001   | 0.0432976 |
| RNA-Seq | Trinity | XLOC_008571 | c13595_g1_i1:0-435  | cdRNA01-preDia | cdRNA03-Dia-R2  | 69.6164 | 4.95224 | -3.81327 | 5.00E-05 | 0.0249845 |
| RNA-Seq | Trinity | XLOC_008571 | c13595_g1_i1:0-435  | cdRNA01-preDia | cdRNA04-Dia-R3  | 69.6164 | 8.03974 | -3.11421 | 5.00E-05 | 0.0249845 |
| RNA-Seq | Trinity | XLOC_008571 | c13595_g1_i1:0-435  | cdRNA02-Dia-R1 | cdRNA03-Dia-R2  | 33.751  | 4.95224 | -2.76878 | 5.00E-05 | 0.0249845 |
| RNA-Seq | Trinity | XLOC_008599 | c13619_g1_i1:10-894 | cdRNA01-preDia | cdRNA05-postDia | 45.673  | 4.80604 | -3.24842 | 5.00E-05 | 0.0249845 |
| RNA-Seq | Trinity | XLOC_008599 | c13619_g1_i1:10-894 | cdRNA01-preDia | cdRNA03-Dia-R2  | 45.673  | 5.4532  | -3.06617 | 5.00E-05 | 0.0249845 |
| RNA-Seq | Trinity | XLOC_008599 | c13619_g1_i1:10-894 | cdRNA01-preDia | cdRNA04-Dia-R3  | 45.673  | 5.90843 | -2.9505  | 5.00E-05 | 0.0249845 |
| RNA-Seq | Trinity | XLOC_008745 | c13759_g1_i1:0-857  | cdRNA02-Dia-R1 | cdRNA05-postDia | 4.64837 | 22.5824 | 2.2804   | 5.00E-05 | 0.0249845 |
| RNA-Seq | Trinity | XLOC_008774 | c13786_g1_i1:0-345  | cdRNA02-Dia-R1 | cdRNA05-postDia | 39.4112 | 957.662 | 4.60284  | 5.00E-05 | 0.0249845 |
| RNA-Seq | Trinity | XLOC_008774 | c13786_g1_i1:0-345  | cdRNA03-Dia-R2 | cdRNA05-postDia | 11.3937 | 957.662 | 6.39321  | 5.00E-05 | 0.0249845 |
| RNA-Seq | Trinity | XLOC_008774 | c13786_g1_i1:0-345  | cdRNA01-preDia | cdRNA05-postDia | 10.8557 | 957.662 | 6.46299  | 5.00E-05 | 0.0249845 |
| RNA-Seq | Trinity | XLOC_008774 | c13786_g1_i1:0-345  | cdRNA04-Dia-R3 | cdRNA05-postDia | 7.20919 | 957.662 | 7.05354  | 5.00E-05 | 0.0249845 |
| RNA-Seq | Trinity | XLOC_008895 | c138_g1_i1:0-2145   | cdRNA01-preDia | cdRNA02-Dia-R1  | 1.18074 | 8.07987 | 2.77464  | 5.00E-05 | 0.0249845 |
| RNA-Seq | Trinity | XLOC_008895 | c138_g1_i1:0-2145   | cdRNA01-preDia | cdRNA03-Dia-R2  | 1.18074 | 18.0682 | 3.93569  | 5.00E-05 | 0.0249845 |
| RNA-Seq | Trinity | XLOC_008895 | c138_g1_i1:0-2145   | cdRNA01-preDia | cdRNA04-Dia-R3  | 1.18074 | 18.6296 | 3.97983  | 5.00E-05 | 0.0249845 |
| RNA-Seq | Trinity | XLOC_008895 | c138_g1_i1:0-2145   | cdRNA01-preDia | cdRNA05-postDia | 1.18074 | 24.9482 | 4.40117  | 5.00E-05 | 0.0249845 |

|         |         |             |                     |                |                 |          |         |          |          |           |
|---------|---------|-------------|---------------------|----------------|-----------------|----------|---------|----------|----------|-----------|
| RNA-Seq | Trinity | XLOC_009345 | c1432_g1_i1:0-1313  | cdRNA04-Dia-R3 | cdRNA05-postDia | 3.89629  | 32.0208 | 3.03884  | 5.00E-05 | 0.0249845 |
| RNA-Seq | Trinity | XLOC_009345 | c1432_g1_i1:0-1313  | cdRNA03-Dia-R2 | cdRNA05-postDia | 2.8813   | 32.0208 | 3.47421  | 5.00E-05 | 0.0249845 |
| RNA-Seq | Trinity | XLOC_009359 | c14342_g1_i1:0-968  | cdRNA01-preDia | cdRNA02-Dia-R1  | 59.5808  | 3.15505 | -4.23911 | 5.00E-05 | 0.0249845 |
| RNA-Seq | Trinity | XLOC_009359 | c14342_g1_i1:0-968  | cdRNA01-preDia | cdRNA05-postDia | 59.5808  | 4.74713 | -3.64972 | 5.00E-05 | 0.0249845 |
| RNA-Seq | Trinity | XLOC_009359 | c14342_g1_i1:0-968  | cdRNA01-preDia | cdRNA04-Dia-R3  | 59.5808  | 6.10222 | -3.28744 | 5.00E-05 | 0.0249845 |
| RNA-Seq | Trinity | XLOC_009359 | c14342_g1_i1:0-968  | cdRNA01-preDia | cdRNA03-Dia-R2  | 59.5808  | 6.35104 | -3.22978 | 5.00E-05 | 0.0249845 |
| RNA-Seq | Trinity | XLOC_009726 | c14689_g1_i1:0-585  | cdRNA03-Dia-R2 | cdRNA05-postDia | 30.8544  | 4.18419 | -2.88246 | 0.0001   | 0.0432976 |
| RNA-Seq | Trinity | XLOC_009726 | c14689_g1_i1:0-585  | cdRNA02-Dia-R1 | cdRNA04-Dia-R3  | 2.57749  | 25.6663 | 3.31584  | 5.00E-05 | 0.0249845 |
| RNA-Seq | Trinity | XLOC_009726 | c14689_g1_i1:0-585  | cdRNA02-Dia-R1 | cdRNA03-Dia-R2  | 2.57749  | 30.8544 | 3.58144  | 5.00E-05 | 0.0249845 |
| RNA-Seq | Trinity | XLOC_009726 | c14689_g1_i1:0-585  | cdRNA01-preDia | cdRNA03-Dia-R2  | 1.97046  | 30.8544 | 3.96887  | 5.00E-05 | 0.0249845 |
| RNA-Seq | Trinity | XLOC_010003 | c14947_g1_i1:1-721  | cdRNA01-preDia | cdRNA05-postDia | 5.28376  | 28.7325 | 2.44305  | 5.00E-05 | 0.0249845 |
| RNA-Seq | Trinity | XLOC_010144 | c15076_g1_i1:0-301  | cdRNA01-preDia | cdRNA05-postDia | 17.649   | 122.632 | 2.79668  | 5.00E-05 | 0.0249845 |
| RNA-Seq | Trinity | XLOC_010144 | c15076_g1_i1:0-301  | cdRNA03-Dia-R2 | cdRNA05-postDia | 16.4453  | 122.632 | 2.89859  | 5.00E-05 | 0.0249845 |
| RNA-Seq | Trinity | XLOC_010144 | c15076_g1_i1:0-301  | cdRNA04-Dia-R3 | cdRNA05-postDia | 14.6724  | 122.632 | 3.06317  | 5.00E-05 | 0.0249845 |
| RNA-Seq | Trinity | XLOC_010144 | c15076_g1_i1:0-301  | cdRNA02-Dia-R1 | cdRNA05-postDia | 11.2243  | 122.632 | 3.44965  | 5.00E-05 | 0.0249845 |
| RNA-Seq | Trinity | XLOC_010210 | c15142_g1_i1:0-282  | cdRNA04-Dia-R3 | cdRNA05-postDia | 46.8396  | 231.578 | 2.30569  | 0.0001   | 0.0432976 |
| RNA-Seq | Trinity | XLOC_010210 | c15142_g1_i1:0-282  | cdRNA03-Dia-R2 | cdRNA05-postDia | 37.031   | 231.578 | 2.64469  | 5.00E-05 | 0.0249845 |
| RNA-Seq | Trinity | XLOC_010566 | c15480_g1_i1:0-286  | cdRNA03-Dia-R2 | cdRNA05-postDia | 18.9203  | 107.409 | 2.50511  | 5.00E-05 | 0.0249845 |
| RNA-Seq | Trinity | XLOC_010566 | c15480_g1_i1:0-286  | cdRNA02-Dia-R1 | cdRNA05-postDia | 11.894   | 107.409 | 3.17481  | 5.00E-05 | 0.0249845 |
| RNA-Seq | Trinity | XLOC_010822 | c15721_g1_i1:0-868  | cdRNA03-Dia-R2 | cdRNA05-postDia | 2.07937  | 12.3646 | 2.572    | 5.00E-05 | 0.0249845 |
| RNA-Seq | Trinity | XLOC_011803 | c16632_g1_i1:0-1182 | cdRNA04-Dia-R3 | cdRNA05-postDia | 0.930143 | 10.2694 | 3.46476  | 5.00E-05 | 0.0249845 |
| RNA-Seq | Trinity | XLOC_011803 | c16632_g1_i1:0-1182 | cdRNA03-Dia-R2 | cdRNA05-postDia | 0.927735 | 10.2694 | 3.4685   | 5.00E-05 | 0.0249845 |
| RNA-Seq | Trinity | XLOC_012034 | c1684_g1_i1:0-2365  | cdRNA01-preDia | cdRNA05-postDia | 9.06941  | 53.4296 | 2.55856  | 5.00E-05 | 0.0249845 |
| RNA-Seq | Trinity | XLOC_012471 | c17265_g1_i1:0-984  | cdRNA03-Dia-R2 | cdRNA05-postDia | 56.3915  | 9.04404 | -2.64044 | 5.00E-05 | 0.0249845 |
| RNA-Seq | Trinity | XLOC_012471 | c17265_g1_i1:0-984  | cdRNA04-Dia-R3 | cdRNA05-postDia | 53.6962  | 9.04404 | -2.56978 | 5.00E-05 | 0.0249845 |
| RNA-Seq | Trinity | XLOC_012471 | c17265_g1_i1:0-984  | cdRNA01-preDia | cdRNA04-Dia-R3  | 10.1317  | 53.6962 | 2.40594  | 5.00E-05 | 0.0249845 |
| RNA-Seq | Trinity | XLOC_012471 | c17265_g1_i1:0-984  | cdRNA01-preDia | cdRNA03-Dia-R2  | 10.1317  | 56.3915 | 2.4766   | 0.0001   | 0.0432976 |
| RNA-Seq | Trinity | XLOC_012494 | c17287_g1_i1:1-441  | cdRNA03-Dia-R2 | cdRNA05-postDia | 16.7149  | 104.7   | 2.64705  | 5.00E-05 | 0.0249845 |
| RNA-Seq | Trinity | XLOC_012494 | c17287_g1_i1:1-441  | cdRNA04-Dia-R3 | cdRNA05-postDia | 13.9723  | 104.7   | 2.90562  | 5.00E-05 | 0.0249845 |
| RNA-Seq | Trinity | XLOC_012508 | c1729_g1_i1:0-764   | cdRNA03-Dia-R2 | cdRNA05-postDia | 22.4716  | 3.13145 | -2.8432  | 0.0001   | 0.0432976 |
| RNA-Seq | Trinity | XLOC_012508 | c1729_g1_i1:0-764   | cdRNA04-Dia-R3 | cdRNA05-postDia | 21.9973  | 3.13145 | -2.81242 | 0.0001   | 0.0432976 |
| RNA-Seq | Trinity | XLOC_012791 | c17565_g1_i1:0-357  | cdRNA01-preDia | cdRNA05-postDia | 29.3236  | 149.442 | 2.34945  | 0.0001   | 0.0432976 |
| RNA-Seq | Trinity | XLOC_012791 | c17565_g1_i1:0-357  | cdRNA03-Dia-R2 | cdRNA05-postDia | 25.937   | 149.442 | 2.5265   | 5.00E-05 | 0.0249845 |
| RNA-Seq | Trinity | XLOC_012791 | c17565_g1_i1:0-357  | cdRNA02-Dia-R1 | cdRNA05-postDia | 22.8593  | 149.442 | 2.70873  | 5.00E-05 | 0.0249845 |
| RNA-Seq | Trinity | XLOC_013042 | c17793_g1_i1:0-623  | cdRNA03-Dia-R2 | cdRNA05-postDia | 10.4505  | 51.554  | 2.30252  | 0.0001   | 0.0432976 |
| RNA-Seq | Trinity | XLOC_013152 | c17898_g1_i1:0-378  | cdRNA03-Dia-R2 | cdRNA05-postDia | 101.872  | 19.4407 | -2.38961 | 5.00E-05 | 0.0249845 |
| RNA-Seq | Trinity | XLOC_013152 | c17898_g1_i1:0-378  | cdRNA04-Dia-R3 | cdRNA05-postDia | 100.273  | 19.4407 | -2.36679 | 5.00E-05 | 0.0249845 |
| RNA-Seq | Trinity | XLOC_013781 | c18493_g1_i1:0-824  | cdRNA04-Dia-R3 | cdRNA05-postDia | 16.0782  | 1.86418 | -3.10849 | 5.00E-05 | 0.0249845 |
| RNA-Seq | Trinity | XLOC_013781 | c18493_g1_i1:0-824  | cdRNA03-Dia-R2 | cdRNA05-postDia | 15.2068  | 1.86418 | -3.0281  | 5.00E-05 | 0.0249845 |
| RNA-Seq | Trinity | XLOC_013781 | c18493_g1_i1:0-824  | cdRNA02-Dia-R1 | cdRNA04-Dia-R3  | 2.92787  | 16.0782 | 2.45719  | 5.00E-05 | 0.0249845 |
| RNA-Seq | Trinity | XLOC_013897 | c185_g1_i1:0-677    | cdRNA02-Dia-R1 | cdRNA05-postDia | 6.10269  | 37.1584 | 2.60617  | 5.00E-05 | 0.0249845 |
| RNA-Seq | Trinity | XLOC_014761 | c19439_g1_i1:0-688  | cdRNA01-preDia | cdRNA05-postDia | 3.91867  | 22.9741 | 2.55157  | 0.0001   | 0.0432976 |
| RNA-Seq | Trinity | XLOC_015727 | c20367_g1_i1:0-641  | cdRNA01-preDia | cdRNA03-Dia-R2  | 33.1838  | 3.88164 | -3.09574 | 5.00E-05 | 0.0249845 |
| RNA-Seq | Trinity | XLOC_015727 | c20367_g1_i1:0-641  | cdRNA01-preDia | cdRNA04-Dia-R3  | 33.1838  | 4.24996 | -2.96496 | 5.00E-05 | 0.0249845 |
| RNA-Seq | Trinity | XLOC_016567 | c21175_g1_i1:0-470  | cdRNA01-preDia | cdRNA05-postDia | 11.4378  | 87.9481 | 2.94284  | 5.00E-05 | 0.0249845 |
| RNA-Seq | Trinity | XLOC_016567 | c21175_g1_i1:0-470  | cdRNA04-Dia-R3 | cdRNA05-postDia | 10.6867  | 87.9481 | 3.04084  | 5.00E-05 | 0.0249845 |
| RNA-Seq | Trinity | XLOC_016567 | c21175_g1_i1:0-470  | cdRNA03-Dia-R2 | cdRNA05-postDia | 10.5292  | 87.9481 | 3.06225  | 5.00E-05 | 0.0249845 |

|         |         |             |                     |                |                 |          |         |          |          |           |
|---------|---------|-------------|---------------------|----------------|-----------------|----------|---------|----------|----------|-----------|
| RNA-Seq | Trinity | XLOC_016567 | c21175_g1_i1:0-470  | cdRNA02-Dia-R1 | cdRNA05-postDia | 10.4041  | 87.9481 | 3.07951  | 5.00E-05 | 0.0249845 |
| RNA-Seq | Trinity | XLOC_017215 | c2179_g1_i1:0-420   | cdRNA01-preDia | cdRNA02-Dia-R1  | 99.6882  | 17.6329 | -2.49915 | 5.00E-05 | 0.0249845 |
| RNA-Seq | Trinity | XLOC_017820 | c2239_g1_i2:16-501  | cdRNA04-Dia-R3 | cdRNA05-postDia | 3.77672  | 28.7913 | 2.93042  | 0.0001   | 0.0432976 |
| RNA-Seq | Trinity | XLOC_017820 | c2239_g1_i2:16-501  | cdRNA02-Dia-R1 | cdRNA05-postDia | 3.3888   | 28.7913 | 3.08678  | 5.00E-05 | 0.0249845 |
| RNA-Seq | Trinity | XLOC_018510 | c23080_g1_i1:0-587  | cdRNA01-preDia | cdRNA05-postDia | 80.7798  | 2.60146 | -4.9566  | 5.00E-05 | 0.0249845 |
| RNA-Seq | Trinity | XLOC_018510 | c23080_g1_i1:0-587  | cdRNA01-preDia | cdRNA02-Dia-R1  | 80.7798  | 2.87482 | -4.81245 | 5.00E-05 | 0.0249845 |
| RNA-Seq | Trinity | XLOC_018510 | c23080_g1_i1:0-587  | cdRNA01-preDia | cdRNA04-Dia-R3  | 80.7798  | 5.04708 | -4.00048 | 5.00E-05 | 0.0249845 |
| RNA-Seq | Trinity | XLOC_018510 | c23080_g1_i1:0-587  | cdRNA01-preDia | cdRNA03-Dia-R2  | 80.7798  | 5.35588 | -3.9148  | 5.00E-05 | 0.0249845 |
| RNA-Seq | Trinity | XLOC_018521 | c23092_g1_i1:11-500 | cdRNA04-Dia-R3 | cdRNA05-postDia | 7.18145  | 44.8881 | 2.64399  | 5.00E-05 | 0.0249845 |
| RNA-Seq | Trinity | XLOC_018521 | c23092_g1_i1:11-500 | cdRNA03-Dia-R2 | cdRNA05-postDia | 6.09016  | 44.8881 | 2.88178  | 5.00E-05 | 0.0249845 |
| RNA-Seq | Trinity | XLOC_018656 | c23223_g1_i1:0-700  | cdRNA02-Dia-R1 | cdRNA04-Dia-R3  | 4.07979  | 21.0911 | 2.37007  | 5.00E-05 | 0.0249845 |
| RNA-Seq | Trinity | XLOC_018656 | c23223_g1_i1:0-700  | cdRNA01-preDia | cdRNA03-Dia-R2  | 2.31025  | 19.8037 | 3.09965  | 5.00E-05 | 0.0249845 |
| RNA-Seq | Trinity | XLOC_018656 | c23223_g1_i1:0-700  | cdRNA01-preDia | cdRNA04-Dia-R3  | 2.31025  | 21.0911 | 3.19051  | 5.00E-05 | 0.0249845 |
| RNA-Seq | Trinity | XLOC_018680 | c2324_g1_i1:0-1182  | cdRNA02-Dia-R1 | cdRNA05-postDia | 2.95155  | 14.5891 | 2.30535  | 5.00E-05 | 0.0249845 |
| RNA-Seq | Trinity | XLOC_018758 | c2332_g1_i1:0-660   | cdRNA01-preDia | cdRNA03-Dia-R2  | 26.3421  | 1.47066 | -4.16284 | 0.0001   | 0.0432976 |
| RNA-Seq | Trinity | XLOC_018758 | c2332_g1_i1:0-660   | cdRNA01-preDia | cdRNA04-Dia-R3  | 26.3421  | 1.57928 | -4.06003 | 5.00E-05 | 0.0249845 |
| RNA-Seq | Trinity | XLOC_019122 | c236_g1_i2:0-1921   | cdRNA04-Dia-R3 | cdRNA05-postDia | 1.83226  | 12.8596 | 2.81115  | 5.00E-05 | 0.0249845 |
| RNA-Seq | Trinity | XLOC_019122 | c236_g1_i2:0-1921   | cdRNA03-Dia-R2 | cdRNA05-postDia | 1.56234  | 12.8596 | 3.04106  | 5.00E-05 | 0.0249845 |
| RNA-Seq | Trinity | XLOC_020363 | c2493_g1_i2:17-1771 | cdRNA04-Dia-R3 | cdRNA05-postDia | 2.1764   | 11.4938 | 2.40084  | 0.0001   | 0.0432976 |
| RNA-Seq | Trinity | XLOC_020363 | c2493_g1_i2:17-1771 | cdRNA02-Dia-R1 | cdRNA05-postDia | 1.19036  | 11.4938 | 3.27138  | 5.00E-05 | 0.0249845 |
| RNA-Seq | Trinity | XLOC_020363 | c2493_g1_i2:17-1771 | cdRNA01-preDia | cdRNA05-postDia | 0.892251 | 11.4938 | 3.68726  | 5.00E-05 | 0.0249845 |
| RNA-Seq | Trinity | XLOC_020980 | c25583_g1_i1:0-645  | cdRNA04-Dia-R3 | cdRNA05-postDia | 7.90714  | 39.4931 | 2.32037  | 5.00E-05 | 0.0249845 |
| RNA-Seq | Trinity | XLOC_022000 | c26707_g1_i1:0-703  | cdRNA01-preDia | cdRNA05-postDia | 2.53392  | 15.894  | 2.64904  | 0.0001   | 0.0432976 |
| RNA-Seq | Trinity | XLOC_022085 | c26785_g1_i1:0-410  | cdRNA03-Dia-R2 | cdRNA05-postDia | 431.352  | 37.3317 | -3.53039 | 5.00E-05 | 0.0249845 |
| RNA-Seq | Trinity | XLOC_022085 | c26785_g1_i1:0-410  | cdRNA04-Dia-R3 | cdRNA05-postDia | 419.786  | 37.3317 | -3.49118 | 5.00E-05 | 0.0249845 |
| RNA-Seq | Trinity | XLOC_022085 | c26785_g1_i1:0-410  | cdRNA01-preDia | cdRNA04-Dia-R3  | 67.6954  | 419.786 | 2.63253  | 5.00E-05 | 0.0249845 |
| RNA-Seq | Trinity | XLOC_022085 | c26785_g1_i1:0-410  | cdRNA01-preDia | cdRNA03-Dia-R2  | 67.6954  | 431.352 | 2.67174  | 5.00E-05 | 0.0249845 |
| RNA-Seq | Trinity | XLOC_022207 | c26899_g1_i1:0-843  | cdRNA04-Dia-R3 | cdRNA05-postDia | 2.50669  | 18.5989 | 2.89136  | 5.00E-05 | 0.0249845 |
| RNA-Seq | Trinity | XLOC_022207 | c26899_g1_i1:0-843  | cdRNA03-Dia-R2 | cdRNA05-postDia | 2.2461   | 18.5989 | 3.04972  | 5.00E-05 | 0.0249845 |
| RNA-Seq | Trinity | XLOC_022246 | c26932_g1_i1:0-1239 | cdRNA02-Dia-R1 | cdRNA05-postDia | 9.28708  | 57.8767 | 2.63969  | 5.00E-05 | 0.0249845 |
| RNA-Seq | Trinity | XLOC_022246 | c26932_g1_i1:0-1239 | cdRNA03-Dia-R2 | cdRNA05-postDia | 7.31806  | 57.8767 | 2.98345  | 5.00E-05 | 0.0249845 |
| RNA-Seq | Trinity | XLOC_022246 | c26932_g1_i1:0-1239 | cdRNA04-Dia-R3 | cdRNA05-postDia | 6.4454   | 57.8767 | 3.16664  | 5.00E-05 | 0.0249845 |
| RNA-Seq | Trinity | XLOC_022249 | c26935_g1_i1:0-1129 | cdRNA02-Dia-R1 | cdRNA05-postDia | 12.7224  | 108.673 | 3.09455  | 5.00E-05 | 0.0249845 |
| RNA-Seq | Trinity | XLOC_022249 | c26935_g1_i1:0-1129 | cdRNA04-Dia-R3 | cdRNA05-postDia | 12.5039  | 108.673 | 3.11955  | 5.00E-05 | 0.0249845 |
| RNA-Seq | Trinity | XLOC_022249 | c26935_g1_i1:0-1129 | cdRNA03-Dia-R2 | cdRNA05-postDia | 11.5641  | 108.673 | 3.23228  | 5.00E-05 | 0.0249845 |
| RNA-Seq | Trinity | XLOC_022249 | c26935_g1_i1:0-1129 | cdRNA01-preDia | cdRNA05-postDia | 3.84243  | 108.673 | 4.82184  | 5.00E-05 | 0.0249845 |
| RNA-Seq | Trinity | XLOC_022258 | c26943_g1_i1:16-620 | cdRNA01-preDia | cdRNA04-Dia-R3  | 116.267  | 9.57041 | -3.60272 | 5.00E-05 | 0.0249845 |
| RNA-Seq | Trinity | XLOC_022258 | c26943_g1_i1:16-620 | cdRNA01-preDia | cdRNA03-Dia-R2  | 116.267  | 10.8482 | -3.42191 | 5.00E-05 | 0.0249845 |
| RNA-Seq | Trinity | XLOC_022258 | c26943_g1_i1:16-620 | cdRNA01-preDia | cdRNA02-Dia-R1  | 116.267  | 16.3671 | -2.82858 | 5.00E-05 | 0.0249845 |
| RNA-Seq | Trinity | XLOC_022258 | c26943_g1_i1:16-620 | cdRNA02-Dia-R1 | cdRNA05-postDia | 16.3671  | 128.232 | 2.96988  | 5.00E-05 | 0.0249845 |
| RNA-Seq | Trinity | XLOC_022258 | c26943_g1_i1:16-620 | cdRNA03-Dia-R2 | cdRNA05-postDia | 10.8482  | 128.232 | 3.56322  | 5.00E-05 | 0.0249845 |
| RNA-Seq | Trinity | XLOC_022258 | c26943_g1_i1:16-620 | cdRNA04-Dia-R3 | cdRNA05-postDia | 9.57041  | 128.232 | 3.74403  | 5.00E-05 | 0.0249845 |
| RNA-Seq | Trinity | XLOC_022347 | c27023_g1_i1:0-1567 | cdRNA01-preDia | cdRNA03-Dia-R2  | 8.7841   | 1.24454 | -2.81928 | 5.00E-05 | 0.0249845 |
| RNA-Seq | Trinity | XLOC_022347 | c27023_g1_i1:0-1567 | cdRNA01-preDia | cdRNA04-Dia-R3  | 8.7841   | 1.50168 | -2.54832 | 0.0001   | 0.0432976 |
| RNA-Seq | Trinity | XLOC_022347 | c27023_g1_i1:0-1567 | cdRNA04-Dia-R3 | cdRNA05-postDia | 1.50168  | 13.4801 | 3.16618  | 5.00E-05 | 0.0249845 |
| RNA-Seq | Trinity | XLOC_022347 | c27023_g1_i1:0-1567 | cdRNA03-Dia-R2 | cdRNA05-postDia | 1.24454  | 13.4801 | 3.43714  | 5.00E-05 | 0.0249845 |
| RNA-Seq | Trinity | XLOC_022454 | c27120_g1_i1:0-710  | cdRNA04-Dia-R3 | cdRNA05-postDia | 8.01503  | 51.7481 | 2.69073  | 5.00E-05 | 0.0249845 |

|         |         |             |                     |                |                 |         |         |          |          |           |
|---------|---------|-------------|---------------------|----------------|-----------------|---------|---------|----------|----------|-----------|
| RNA-Seq | Trinity | XLOC_022454 | c27120_g1_i1:0-710  | cdRNA03-Dia-R2 | cdRNA05-postDia | 7.48429 | 51.7481 | 2.78957  | 5.00E-05 | 0.0249845 |
| RNA-Seq | Trinity | XLOC_022639 | c27290_g1_i1:0-680  | cdRNA01-preDia | cdRNA02-Dia-R1  | 72.6346 | 1.37539 | -5.72274 | 5.00E-05 | 0.0249845 |
| RNA-Seq | Trinity | XLOC_022639 | c27290_g1_i1:0-680  | cdRNA01-preDia | cdRNA04-Dia-R3  | 72.6346 | 4.77766 | -3.92628 | 5.00E-05 | 0.0249845 |
| RNA-Seq | Trinity | XLOC_022639 | c27290_g1_i1:0-680  | cdRNA01-preDia | cdRNA03-Dia-R2  | 72.6346 | 4.97248 | -3.86862 | 0.0001   | 0.0432976 |
| RNA-Seq | Trinity | XLOC_022662 | c27311_g1_i1:0-2026 | cdRNA03-Dia-R2 | cdRNA05-postDia | 24.358  | 2.99682 | -3.02289 | 5.00E-05 | 0.0249845 |
| RNA-Seq | Trinity | XLOC_022662 | c27311_g1_i1:0-2026 | cdRNA04-Dia-R3 | cdRNA05-postDia | 23.1332 | 2.99682 | -2.94847 | 5.00E-05 | 0.0249845 |
| RNA-Seq | Trinity | XLOC_022765 | c27406_g1_i1:0-1481 | cdRNA01-preDia | cdRNA03-Dia-R2  | 3.74408 | 20.6667 | 2.46463  | 5.00E-05 | 0.0249845 |
| RNA-Seq | Trinity | XLOC_022765 | c27406_g1_i1:0-1481 | cdRNA01-preDia | cdRNA04-Dia-R3  | 3.74408 | 21.9347 | 2.55054  | 5.00E-05 | 0.0249845 |
| RNA-Seq | Trinity | XLOC_022799 | c27438_g1_i1:6-370  | cdRNA04-Dia-R3 | cdRNA05-postDia | 31.179  | 154.485 | 2.30882  | 5.00E-05 | 0.0249845 |
| RNA-Seq | Trinity | XLOC_022799 | c27438_g1_i1:6-370  | cdRNA03-Dia-R2 | cdRNA05-postDia | 29.0087 | 154.485 | 2.41291  | 5.00E-05 | 0.0249845 |
| RNA-Seq | Trinity | XLOC_022799 | c27438_g1_i1:6-370  | cdRNA02-Dia-R1 | cdRNA05-postDia | 21.3268 | 154.485 | 2.85673  | 5.00E-05 | 0.0249845 |
| RNA-Seq | Trinity | XLOC_022910 | c27543_g1_i1:0-1988 | cdRNA03-Dia-R2 | cdRNA05-postDia | 10.1055 | 1.74256 | -2.53587 | 5.00E-05 | 0.0249845 |
| RNA-Seq | Trinity | XLOC_022910 | c27543_g1_i1:0-1988 | cdRNA04-Dia-R3 | cdRNA05-postDia | 9.53963 | 1.74256 | -2.45273 | 5.00E-05 | 0.0249845 |
| RNA-Seq | Trinity | XLOC_022951 | c2757_g1_i1:0-480   | cdRNA03-Dia-R2 | cdRNA05-postDia | 7.43215 | 46.3518 | 2.64077  | 5.00E-05 | 0.0249845 |
| RNA-Seq | Trinity | XLOC_022951 | c2757_g1_i1:0-480   | cdRNA04-Dia-R3 | cdRNA05-postDia | 7.00364 | 46.3518 | 2.72645  | 5.00E-05 | 0.0249845 |
| RNA-Seq | Trinity | XLOC_022951 | c2757_g1_i1:0-480   | cdRNA01-preDia | cdRNA05-postDia | 5.58328 | 46.3518 | 3.05344  | 5.00E-05 | 0.0249845 |
| RNA-Seq | Trinity | XLOC_022970 | c27597_g1_i1:0-756  | cdRNA01-preDia | cdRNA05-postDia | 1.64639 | 14.5123 | 3.1399   | 0.0001   | 0.0432976 |
| RNA-Seq | Trinity | XLOC_023143 | c27758_g1_i1:1-421  | cdRNA01-preDia | cdRNA03-Dia-R2  | 33.2904 | 222.424 | 2.74013  | 5.00E-05 | 0.0249845 |
| RNA-Seq | Trinity | XLOC_023143 | c27758_g1_i1:1-421  | cdRNA01-preDia | cdRNA04-Dia-R3  | 33.2904 | 224.939 | 2.75635  | 5.00E-05 | 0.0249845 |
| RNA-Seq | Trinity | XLOC_023173 | c27786_g1_i1:0-1352 | cdRNA03-Dia-R2 | cdRNA05-postDia | 83.8806 | 15.6574 | -2.42149 | 5.00E-05 | 0.0249845 |
| RNA-Seq | Trinity | XLOC_023173 | c27786_g1_i1:0-1352 | cdRNA02-Dia-R1 | cdRNA04-Dia-R3  | 15.8386 | 81.0895 | 2.35607  | 5.00E-05 | 0.0249845 |
| RNA-Seq | Trinity | XLOC_023173 | c27786_g1_i1:0-1352 | cdRNA02-Dia-R1 | cdRNA03-Dia-R2  | 15.8386 | 83.8806 | 2.40489  | 0.0001   | 0.0432976 |
| RNA-Seq | Trinity | XLOC_023173 | c27786_g1_i1:0-1352 | cdRNA01-preDia | cdRNA04-Dia-R3  | 9.08681 | 81.0895 | 3.15767  | 5.00E-05 | 0.0249845 |
| RNA-Seq | Trinity | XLOC_023173 | c27786_g1_i1:0-1352 | cdRNA01-preDia | cdRNA03-Dia-R2  | 9.08681 | 83.8806 | 3.20649  | 5.00E-05 | 0.0249845 |
| RNA-Seq | Trinity | XLOC_023195 | c27806_g1_i1:0-279  | cdRNA01-preDia | cdRNA03-Dia-R2  | 108.428 | 745.186 | 2.78086  | 5.00E-05 | 0.0249845 |
| RNA-Seq | Trinity | XLOC_023195 | c27806_g1_i1:0-279  | cdRNA01-preDia | cdRNA04-Dia-R3  | 108.428 | 782.853 | 2.852    | 5.00E-05 | 0.0249845 |
| RNA-Seq | Trinity | XLOC_023195 | c27806_g1_i1:0-279  | cdRNA01-preDia | cdRNA05-postDia | 108.428 | 1227.92 | 3.5014   | 5.00E-05 | 0.0249845 |
| RNA-Seq | Trinity | XLOC_023280 | c27886_g1_i1:0-3254 | cdRNA03-Dia-R2 | cdRNA05-postDia | 40.9238 | 5.78886 | -2.82159 | 5.00E-05 | 0.0249845 |
| RNA-Seq | Trinity | XLOC_023280 | c27886_g1_i1:0-3254 | cdRNA04-Dia-R3 | cdRNA05-postDia | 40.936  | 5.78886 | -2.82202 | 5.00E-05 | 0.0249845 |
| RNA-Seq | Trinity | XLOC_023297 | c27900_g1_i1:0-1418 | cdRNA02-Dia-R1 | cdRNA05-postDia | 8.28544 | 45.7318 | 2.46455  | 5.00E-05 | 0.0249845 |
| RNA-Seq | Trinity | XLOC_023548 | c28129_g1_i1:0-873  | cdRNA04-Dia-R3 | cdRNA05-postDia | 30.8211 | 5.83825 | -2.40031 | 5.00E-05 | 0.0249845 |
| RNA-Seq | Trinity | XLOC_023635 | c2820_g1_i1:0-1169  | cdRNA04-Dia-R3 | cdRNA05-postDia | 137.512 | 21.2699 | -2.69268 | 0.0001   | 0.0432976 |
| RNA-Seq | Trinity | XLOC_023635 | c2820_g1_i1:0-1169  | cdRNA03-Dia-R2 | cdRNA05-postDia | 127.422 | 21.2699 | -2.58273 | 0.0001   | 0.0432976 |
| RNA-Seq | Trinity | XLOC_023659 | c28231_g1_i1:0-1014 | cdRNA03-Dia-R2 | cdRNA05-postDia | 2.62992 | 20.4196 | 2.95686  | 5.00E-05 | 0.0249845 |
| RNA-Seq | Trinity | XLOC_023827 | c28387_g1_i1:0-2540 | cdRNA01-preDia | cdRNA05-postDia | 2.28356 | 21.1903 | 3.21405  | 5.00E-05 | 0.0249845 |
| RNA-Seq | Trinity | XLOC_023851 | c28409_g1_i1:0-1761 | cdRNA01-preDia | cdRNA03-Dia-R2  | 10.6589 | 1.84957 | -2.52679 | 5.00E-05 | 0.0249845 |
| RNA-Seq | Trinity | XLOC_023851 | c28409_g1_i1:0-1761 | cdRNA03-Dia-R2 | cdRNA05-postDia | 1.84957 | 13.3619 | 2.85286  | 5.00E-05 | 0.0249845 |
| RNA-Seq | Trinity | XLOC_023851 | c28409_g1_i1:0-1761 | cdRNA04-Dia-R3 | cdRNA05-postDia | 1.63104 | 13.3619 | 3.03426  | 0.0001   | 0.0432976 |
| RNA-Seq | Trinity | XLOC_023940 | c28490_g1_i1:0-1075 | cdRNA01-preDia | cdRNA03-Dia-R2  | 75.9426 | 12.8175 | -2.5668  | 5.00E-05 | 0.0249845 |
| RNA-Seq | Trinity | XLOC_023940 | c28490_g1_i1:0-1075 | cdRNA01-preDia | cdRNA04-Dia-R3  | 75.9426 | 13.7949 | -2.46078 | 5.00E-05 | 0.0249845 |
| RNA-Seq | Trinity | XLOC_024008 | c28554_g1_i1:0-1379 | cdRNA01-preDia | cdRNA05-postDia | 5.4815  | 31.9521 | 2.54327  | 0.0001   | 0.0432976 |
| RNA-Seq | Trinity | XLOC_024089 | c28630_g1_i1:0-1464 | cdRNA04-Dia-R3 | cdRNA05-postDia | 29.9317 | 3.9539  | -2.92032 | 5.00E-05 | 0.0249845 |
| RNA-Seq | Trinity | XLOC_024089 | c28630_g1_i1:0-1464 | cdRNA03-Dia-R2 | cdRNA05-postDia | 28.7101 | 3.9539  | -2.86021 | 5.00E-05 | 0.0249845 |
| RNA-Seq | Trinity | XLOC_024162 | c2869_g1_i1:1-224   | cdRNA04-Dia-R3 | cdRNA05-postDia | 49.3838 | 247.877 | 2.32752  | 5.00E-05 | 0.0249845 |
| RNA-Seq | Trinity | XLOC_024162 | c2869_g1_i1:1-224   | cdRNA03-Dia-R2 | cdRNA05-postDia | 44.6092 | 247.877 | 2.47421  | 5.00E-05 | 0.0249845 |
| RNA-Seq | Trinity | XLOC_024162 | c2869_g1_i1:1-224   | cdRNA01-preDia | cdRNA05-postDia | 28.1694 | 247.877 | 3.13742  | 5.00E-05 | 0.0249845 |
| RNA-Seq | Trinity | XLOC_024450 | c28969_g1_i1:0-464  | cdRNA01-preDia | cdRNA05-postDia | 8.35838 | 47.5179 | 2.50718  | 5.00E-05 | 0.0249845 |

|         |         |             |                     |                |                 |         |         |          |          |           |
|---------|---------|-------------|---------------------|----------------|-----------------|---------|---------|----------|----------|-----------|
| RNA-Seq | Trinity | XLOC_024500 | c29015_g1_i1:0-1099 | cdRNA03-Dia-R2 | cdRNA05-postDia | 64.4405 | 415.206 | 2.68779  | 5.00E-05 | 0.0249845 |
| RNA-Seq | Trinity | XLOC_024500 | c29015_g1_i1:0-1099 | cdRNA04-Dia-R3 | cdRNA05-postDia | 64.1603 | 415.206 | 2.69407  | 5.00E-05 | 0.0249845 |
| RNA-Seq | Trinity | XLOC_024556 | c2906_g1_i1:0-1536  | cdRNA03-Dia-R2 | cdRNA05-postDia | 1.33274 | 8.16855 | 2.61569  | 5.00E-05 | 0.0249845 |
| RNA-Seq | Trinity | XLOC_024556 | c2906_g1_i1:0-1536  | cdRNA04-Dia-R3 | cdRNA05-postDia | 1.08133 | 8.16855 | 2.91727  | 5.00E-05 | 0.0249845 |
| RNA-Seq | Trinity | XLOC_024575 | c29089_g1_i1:0-1230 | cdRNA01-preDia | cdRNA05-postDia | 3.00397 | 20.5103 | 2.7714   | 5.00E-05 | 0.0249845 |
| RNA-Seq | Trinity | XLOC_024629 | c29139_g1_i1:0-414  | cdRNA01-preDia | cdRNA05-postDia | 17.6841 | 105.124 | 2.57157  | 5.00E-05 | 0.0249845 |
| RNA-Seq | Trinity | XLOC_024629 | c29139_g1_i1:0-414  | cdRNA02-Dia-R1 | cdRNA05-postDia | 16.2938 | 105.124 | 2.6897   | 5.00E-05 | 0.0249845 |
| RNA-Seq | Trinity | XLOC_024713 | c29218_g1_i1:0-2349 | cdRNA01-preDia | cdRNA03-Dia-R2  | 173.438 | 13.3336 | -3.70128 | 5.00E-05 | 0.0249845 |
| RNA-Seq | Trinity | XLOC_024713 | c29218_g1_i1:0-2349 | cdRNA01-preDia | cdRNA04-Dia-R3  | 173.438 | 13.5534 | -3.67769 | 5.00E-05 | 0.0249845 |
| RNA-Seq | Trinity | XLOC_024883 | c29378_g1_i1:0-1995 | cdRNA01-preDia | cdRNA03-Dia-R2  | 11.2519 | 74.427  | 2.72566  | 5.00E-05 | 0.0249845 |
| RNA-Seq | Trinity | XLOC_024883 | c29378_g1_i1:0-1995 | cdRNA01-preDia | cdRNA04-Dia-R3  | 11.2519 | 78.5795 | 2.80398  | 5.00E-05 | 0.0249845 |
| RNA-Seq | Trinity | XLOC_024919 | c29410_g1_i1:0-2140 | cdRNA04-Dia-R3 | cdRNA05-postDia | 239.834 | 26.4742 | -3.17938 | 5.00E-05 | 0.0249845 |
| RNA-Seq | Trinity | XLOC_024919 | c29410_g1_i1:0-2140 | cdRNA03-Dia-R2 | cdRNA05-postDia | 239.12  | 26.4742 | -3.17507 | 5.00E-05 | 0.0249845 |
| RNA-Seq | Trinity | XLOC_024986 | c29474_g1_i1:0-1683 | cdRNA03-Dia-R2 | cdRNA05-postDia | 18.0575 | 152.873 | 3.08167  | 5.00E-05 | 0.0249845 |
| RNA-Seq | Trinity | XLOC_024986 | c29474_g1_i1:0-1683 | cdRNA04-Dia-R3 | cdRNA05-postDia | 17.0681 | 152.873 | 3.16296  | 5.00E-05 | 0.0249845 |
| RNA-Seq | Trinity | XLOC_024988 | c29476_g1_i1:0-1140 | cdRNA01-preDia | cdRNA04-Dia-R3  | 34.1946 | 186.763 | 2.44937  | 0.0001   | 0.0432976 |
| RNA-Seq | Trinity | XLOC_024997 | c29484_g1_i1:0-717  | cdRNA02-Dia-R1 | cdRNA05-postDia | 6.26495 | 32.0081 | 2.35306  | 0.0001   | 0.0432976 |
| RNA-Seq | Trinity | XLOC_024997 | c29484_g1_i1:0-717  | cdRNA03-Dia-R2 | cdRNA05-postDia | 5.84421 | 32.0081 | 2.45336  | 0.0001   | 0.0432976 |
| RNA-Seq | Trinity | XLOC_024997 | c29484_g1_i1:0-717  | cdRNA04-Dia-R3 | cdRNA05-postDia | 5.3197  | 32.0081 | 2.58902  | 0.0001   | 0.0432976 |
| RNA-Seq | Trinity | XLOC_025325 | c29788_g2_i1:0-1158 | cdRNA04-Dia-R3 | cdRNA05-postDia | 13.9853 | 89.6951 | 2.68112  | 5.00E-05 | 0.0249845 |
| RNA-Seq | Trinity | XLOC_025325 | c29788_g2_i1:0-1158 | cdRNA02-Dia-R1 | cdRNA05-postDia | 13.5693 | 89.6951 | 2.72468  | 5.00E-05 | 0.0249845 |
| RNA-Seq | Trinity | XLOC_025325 | c29788_g2_i1:0-1158 | cdRNA03-Dia-R2 | cdRNA05-postDia | 12.2399 | 89.6951 | 2.87344  | 5.00E-05 | 0.0249845 |
| RNA-Seq | Trinity | XLOC_025503 | c29955_g1_i1:0-823  | cdRNA01-preDia | cdRNA05-postDia | 6.1281  | 48.0963 | 2.97241  | 5.00E-05 | 0.0249845 |
| RNA-Seq | Trinity | XLOC_025555 | c30001_g1_i1:0-800  | cdRNA04-Dia-R3 | cdRNA05-postDia | 9.92092 | 56.84   | 2.51836  | 0.0001   | 0.0432976 |
| RNA-Seq | Trinity | XLOC_025555 | c30001_g1_i1:0-800  | cdRNA01-preDia | cdRNA05-postDia | 4.17676 | 56.84   | 3.76645  | 5.00E-05 | 0.0249845 |
| RNA-Seq | Trinity | XLOC_025725 | c30166_g1_i1:0-910  | cdRNA02-Dia-R1 | cdRNA05-postDia | 4.63663 | 43.2421 | 3.22129  | 5.00E-05 | 0.0249845 |
| RNA-Seq | Trinity | XLOC_025725 | c30166_g1_i1:0-910  | cdRNA03-Dia-R2 | cdRNA05-postDia | 4.35836 | 43.2421 | 3.31058  | 5.00E-05 | 0.0249845 |
| RNA-Seq | Trinity | XLOC_025725 | c30166_g1_i1:0-910  | cdRNA04-Dia-R3 | cdRNA05-postDia | 3.16754 | 43.2421 | 3.771    | 5.00E-05 | 0.0249845 |
| RNA-Seq | Trinity | XLOC_025920 | c30351_g1_i1:0-1373 | cdRNA01-preDia | cdRNA04-Dia-R3  | 6.01666 | 29.7002 | 2.30344  | 0.0001   | 0.0432976 |
| RNA-Seq | Trinity | XLOC_025920 | c30351_g1_i1:0-1373 | cdRNA01-preDia | cdRNA02-Dia-R1  | 6.01666 | 47.4005 | 2.97787  | 5.00E-05 | 0.0249845 |
| RNA-Seq | Trinity | XLOC_025929 | c3035_g1_i1:0-1353  | cdRNA03-Dia-R2 | cdRNA05-postDia | 8.78933 | 1.21404 | -2.85593 | 0.0001   | 0.0432976 |
| RNA-Seq | Trinity | XLOC_025944 | c30375_g1_i1:3-339  | cdRNA01-preDia | cdRNA05-postDia | 13.0427 | 103.449 | 2.98761  | 5.00E-05 | 0.0249845 |
| RNA-Seq | Trinity | XLOC_026005 | c30433_g1_i1:0-917  | cdRNA04-Dia-R3 | cdRNA05-postDia | 14.7785 | 79.1511 | 2.42111  | 5.00E-05 | 0.0249845 |
| RNA-Seq | Trinity | XLOC_026005 | c30433_g1_i1:0-917  | cdRNA03-Dia-R2 | cdRNA05-postDia | 13.8319 | 79.1511 | 2.5166   | 5.00E-05 | 0.0249845 |
| RNA-Seq | Trinity | XLOC_026016 | c30446_g1_i1:0-1935 | cdRNA01-preDia | cdRNA03-Dia-R2  | 12.6235 | 74.1352 | 2.55405  | 0.0001   | 0.0432976 |
| RNA-Seq | Trinity | XLOC_026016 | c30446_g1_i1:0-1935 | cdRNA01-preDia | cdRNA04-Dia-R3  | 12.6235 | 76.7487 | 2.60403  | 5.00E-05 | 0.0249845 |
| RNA-Seq | Trinity | XLOC_026153 | c30572_g1_i1:0-1265 | cdRNA03-Dia-R2 | cdRNA05-postDia | 2.97447 | 23.1393 | 2.95964  | 5.00E-05 | 0.0249845 |
| RNA-Seq | Trinity | XLOC_026153 | c30572_g1_i1:0-1265 | cdRNA04-Dia-R3 | cdRNA05-postDia | 2.00055 | 23.1393 | 3.53188  | 5.00E-05 | 0.0249845 |
| RNA-Seq | Trinity | XLOC_026320 | c30734_g1_i1:3-1177 | cdRNA02-Dia-R1 | cdRNA05-postDia | 5.30751 | 31.0213 | 2.54715  | 5.00E-05 | 0.0249845 |
| RNA-Seq | Trinity | XLOC_026320 | c30734_g1_i1:3-1177 | cdRNA04-Dia-R3 | cdRNA05-postDia | 3.00882 | 31.0213 | 3.36599  | 5.00E-05 | 0.0249845 |
| RNA-Seq | Trinity | XLOC_026320 | c30734_g1_i1:3-1177 | cdRNA03-Dia-R2 | cdRNA05-postDia | 2.39947 | 31.0213 | 3.69247  | 5.00E-05 | 0.0249845 |
| RNA-Seq | Trinity | XLOC_026418 | c30832_g1_i1:0-886  | cdRNA01-preDia | cdRNA05-postDia | 18.3663 | 3.38943 | -2.43795 | 0.0001   | 0.0432976 |
| RNA-Seq | Trinity | XLOC_026672 | c31068_g1_i1:0-1200 | cdRNA03-Dia-R2 | cdRNA05-postDia | 5.58464 | 30.5317 | 2.45077  | 5.00E-05 | 0.0249845 |
| RNA-Seq | Trinity | XLOC_026672 | c31068_g1_i1:0-1200 | cdRNA01-preDia | cdRNA05-postDia | 1.90428 | 30.5317 | 4.00299  | 5.00E-05 | 0.0249845 |
| RNA-Seq | Trinity | XLOC_026811 | c311_g1_i1:0-2010   | cdRNA03-Dia-R2 | cdRNA05-postDia | 5.98509 | 36.8321 | 2.62152  | 5.00E-05 | 0.0249845 |
| RNA-Seq | Trinity | XLOC_026811 | c311_g1_i1:0-2010   | cdRNA04-Dia-R3 | cdRNA05-postDia | 5.5827  | 36.8321 | 2.72193  | 5.00E-05 | 0.0249845 |
| RNA-Seq | Trinity | XLOC_026867 | c31251_g1_i1:0-974  | cdRNA04-Dia-R3 | cdRNA05-postDia | 80.3843 | 10.6108 | -2.92139 | 5.00E-05 | 0.0249845 |

|         |         |             |                     |                |                 |         |         |          |          |           |
|---------|---------|-------------|---------------------|----------------|-----------------|---------|---------|----------|----------|-----------|
| RNA-Seq | Trinity | XLOC_026867 | c31251_g1_i1:0-974  | cdRNA03-Dia-R2 | cdRNA05-postDia | 68.4462 | 10.6108 | -2.68944 | 5.00E-05 | 0.0249845 |
| RNA-Seq | Trinity | XLOC_027293 | c31654_g1_i1:0-1267 | cdRNA04-Dia-R3 | cdRNA05-postDia | 5.70512 | 33.8938 | 2.57069  | 5.00E-05 | 0.0249845 |
| RNA-Seq | Trinity | XLOC_027303 | c31663_g1_i1:0-302  | cdRNA01-preDia | cdRNA05-postDia | 23.7127 | 159.974 | 2.7541   | 5.00E-05 | 0.0249845 |
| RNA-Seq | Trinity | XLOC_027303 | c31663_g1_i1:0-302  | cdRNA04-Dia-R3 | cdRNA05-postDia | 14.9156 | 159.974 | 3.42294  | 5.00E-05 | 0.0249845 |
| RNA-Seq | Trinity | XLOC_027303 | c31663_g1_i1:0-302  | cdRNA03-Dia-R2 | cdRNA05-postDia | 10.8667 | 159.974 | 3.87985  | 5.00E-05 | 0.0249845 |
| RNA-Seq | Trinity | XLOC_027303 | c31663_g1_i1:0-302  | cdRNA02-Dia-R1 | cdRNA05-postDia | 8.49019 | 159.974 | 4.23589  | 5.00E-05 | 0.0249845 |
| RNA-Seq | Trinity | XLOC_027486 | c3182_g1_i1:0-560   | cdRNA03-Dia-R2 | cdRNA05-postDia | 28.9211 | 3.91826 | -2.88384 | 5.00E-05 | 0.0249845 |
| RNA-Seq | Trinity | XLOC_027486 | c3182_g1_i1:0-560   | cdRNA04-Dia-R3 | cdRNA05-postDia | 26.8298 | 3.91826 | -2.77555 | 0.0001   | 0.0432976 |
| RNA-Seq | Trinity | XLOC_027578 | c31915_g1_i1:0-219  | cdRNA03-Dia-R2 | cdRNA05-postDia | 238.004 | 30.1871 | -2.97899 | 5.00E-05 | 0.0249845 |
| RNA-Seq | Trinity | XLOC_027578 | c31915_g1_i1:0-219  | cdRNA04-Dia-R3 | cdRNA05-postDia | 230.659 | 30.1871 | -2.93376 | 5.00E-05 | 0.0249845 |
| RNA-Seq | Trinity | XLOC_028006 | c32319_g1_i1:1-781  | cdRNA01-preDia | cdRNA05-postDia | 6.99717 | 69.1232 | 3.30433  | 5.00E-05 | 0.0249845 |
| RNA-Seq | Trinity | XLOC_028035 | c32347_g1_i1:0-851  | cdRNA01-preDia | cdRNA03-Dia-R2  | 26.322  | 199.133 | 2.91939  | 0.0001   | 0.0432976 |
| RNA-Seq | Trinity | XLOC_028035 | c32347_g1_i1:0-851  | cdRNA01-preDia | cdRNA04-Dia-R3  | 26.322  | 202.697 | 2.94498  | 5.00E-05 | 0.0249845 |
| RNA-Seq | Trinity | XLOC_028171 | c32478_g1_i1:2-555  | cdRNA03-Dia-R2 | cdRNA05-postDia | 23.7366 | 118.649 | 2.32152  | 0.0001   | 0.0432976 |
| RNA-Seq | Trinity | XLOC_028171 | c32478_g1_i1:2-555  | cdRNA04-Dia-R3 | cdRNA05-postDia | 22.5894 | 118.649 | 2.39298  | 5.00E-05 | 0.0249845 |
| RNA-Seq | Trinity | XLOC_028360 | c3265_g1_i1:0-1109  | cdRNA01-preDia | cdRNA03-Dia-R2  | 17.7266 | 1.96155 | -3.17585 | 5.00E-05 | 0.0249845 |
| RNA-Seq | Trinity | XLOC_028360 | c3265_g1_i1:0-1109  | cdRNA01-preDia | cdRNA04-Dia-R3  | 17.7266 | 2.13599 | -3.05294 | 5.00E-05 | 0.0249845 |
| RNA-Seq | Trinity | XLOC_028750 | c33026_g1_i1:0-1284 | cdRNA02-Dia-R1 | cdRNA05-postDia | 3.77497 | 20.4074 | 2.43455  | 5.00E-05 | 0.0249845 |
| RNA-Seq | Trinity | XLOC_028773 | c33047_g1_i1:9-765  | cdRNA01-preDia | cdRNA05-postDia | 2.4338  | 16.8228 | 2.78914  | 0.0001   | 0.0432976 |
| RNA-Seq | Trinity | XLOC_028773 | c33047_g1_i1:9-765  | cdRNA01-preDia | cdRNA04-Dia-R3  | 2.4338  | 16.8915 | 2.79502  | 0.0001   | 0.0432976 |
| RNA-Seq | Trinity | XLOC_028773 | c33047_g1_i1:9-765  | cdRNA01-preDia | cdRNA03-Dia-R2  | 2.4338  | 20.0816 | 3.04459  | 5.00E-05 | 0.0249845 |
| RNA-Seq | Trinity | XLOC_028828 | c3309_g1_i1:0-701   | cdRNA04-Dia-R3 | cdRNA05-postDia | 2.97427 | 20.3684 | 2.77573  | 5.00E-05 | 0.0249845 |
| RNA-Seq | Trinity | XLOC_028828 | c3309_g1_i1:0-701   | cdRNA03-Dia-R2 | cdRNA05-postDia | 2.61931 | 20.3684 | 2.95907  | 5.00E-05 | 0.0249845 |
| RNA-Seq | Trinity | XLOC_028914 | c33184_g1_i1:0-1446 | cdRNA04-Dia-R3 | cdRNA05-postDia | 53.3151 | 9.72316 | -2.45505 | 5.00E-05 | 0.0249845 |
| RNA-Seq | Trinity | XLOC_029041 | c33312_g1_i1:0-700  | cdRNA03-Dia-R2 | cdRNA05-postDia | 9.3849  | 44.9169 | 2.25884  | 0.0001   | 0.0432976 |
| RNA-Seq | Trinity | XLOC_029041 | c33312_g1_i1:0-700  | cdRNA04-Dia-R3 | cdRNA05-postDia | 8.71154 | 44.9169 | 2.36626  | 5.00E-05 | 0.0249845 |
| RNA-Seq | Trinity | XLOC_029041 | c33312_g1_i1:0-700  | cdRNA02-Dia-R1 | cdRNA05-postDia | 7.19964 | 44.9169 | 2.64126  | 5.00E-05 | 0.0249845 |
| RNA-Seq | Trinity | XLOC_029069 | c33339_g1_i1:0-471  | cdRNA01-preDia | cdRNA05-postDia | 3.40369 | 34.0325 | 3.32174  | 5.00E-05 | 0.0249845 |
| RNA-Seq | Trinity | XLOC_029130 | c33398_g1_i1:2-570  | cdRNA01-preDia | cdRNA05-postDia | 12.4835 | 72.4823 | 2.53761  | 5.00E-05 | 0.0249845 |
| RNA-Seq | Trinity | XLOC_029132 | c3339_g1_i1:2-289   | cdRNA04-Dia-R3 | cdRNA05-postDia | 160.734 | 16.6758 | -3.26885 | 5.00E-05 | 0.0249845 |
| RNA-Seq | Trinity | XLOC_029132 | c3339_g1_i1:2-289   | cdRNA03-Dia-R2 | cdRNA05-postDia | 148.998 | 16.6758 | -3.15947 | 5.00E-05 | 0.0249845 |
| RNA-Seq | Trinity | XLOC_029329 | c33586_g1_i1:6-719  | cdRNA01-preDia | cdRNA05-postDia | 2.87228 | 19.575  | 2.76874  | 5.00E-05 | 0.0249845 |
| RNA-Seq | Trinity | XLOC_029329 | c33586_g1_i1:6-719  | cdRNA04-Dia-R3 | cdRNA05-postDia | 2.45736 | 19.575  | 2.99383  | 0.0001   | 0.0432976 |
| RNA-Seq | Trinity | XLOC_029329 | c33586_g1_i1:6-719  | cdRNA03-Dia-R2 | cdRNA05-postDia | 1.16253 | 19.575  | 4.07368  | 5.00E-05 | 0.0249845 |
| RNA-Seq | Trinity | XLOC_029607 | c33855_g1_i1:7-800  | cdRNA01-preDia | cdRNA05-postDia | 41.6602 | 5.95455 | -2.80661 | 5.00E-05 | 0.0249845 |
| RNA-Seq | Trinity | XLOC_029607 | c33855_g1_i1:7-800  | cdRNA01-preDia | cdRNA03-Dia-R2  | 41.6602 | 7.30033 | -2.51264 | 5.00E-05 | 0.0249845 |
| RNA-Seq | Trinity | XLOC_030016 | c34238_g1_i1:0-768  | cdRNA01-preDia | cdRNA04-Dia-R3  | 12.0502 | 60.7523 | 2.33388  | 0.0001   | 0.0432976 |
| RNA-Seq | Trinity | XLOC_030083 | c3429_g1_i1:0-871   | cdRNA02-Dia-R1 | cdRNA05-postDia | 22.2186 | 3.46565 | -2.68057 | 5.00E-05 | 0.0249845 |
| RNA-Seq | Trinity | XLOC_030100 | c34315_g1_i1:0-472  | cdRNA03-Dia-R2 | cdRNA05-postDia | 89.4929 | 15.1682 | -2.56072 | 5.00E-05 | 0.0249845 |
| RNA-Seq | Trinity | XLOC_030100 | c34315_g1_i1:0-472  | cdRNA04-Dia-R3 | cdRNA05-postDia | 86.5523 | 15.1682 | -2.51252 | 5.00E-05 | 0.0249845 |
| RNA-Seq | Trinity | XLOC_030100 | c34315_g1_i1:0-472  | cdRNA01-preDia | cdRNA04-Dia-R3  | 17.3973 | 86.5523 | 2.31471  | 0.0001   | 0.0432976 |
| RNA-Seq | Trinity | XLOC_030363 | c34567_g1_i1:0-922  | cdRNA01-preDia | cdRNA05-postDia | 6.82408 | 54.6203 | 3.00073  | 5.00E-05 | 0.0249845 |
| RNA-Seq | Trinity | XLOC_030411 | c34612_g1_i1:0-532  | cdRNA04-Dia-R3 | cdRNA05-postDia | 109.547 | 24.5443 | -2.15809 | 0.0001   | 0.0432976 |
| RNA-Seq | Trinity | XLOC_030411 | c34612_g1_i1:0-532  | cdRNA01-preDia | cdRNA04-Dia-R3  | 20.1178 | 109.547 | 2.44501  | 0.0001   | 0.0432976 |
| RNA-Seq | Trinity | XLOC_030588 | c34789_g1_i1:0-266  | cdRNA04-Dia-R3 | cdRNA05-postDia | 51.7714 | 318.207 | 2.61974  | 5.00E-05 | 0.0249845 |
| RNA-Seq | Trinity | XLOC_030588 | c34789_g1_i1:0-266  | cdRNA03-Dia-R2 | cdRNA05-postDia | 39.4398 | 318.207 | 3.01224  | 5.00E-05 | 0.0249845 |
| RNA-Seq | Trinity | XLOC_030972 | c35170_g1_i1:0-681  | cdRNA03-Dia-R2 | cdRNA05-postDia | 3.96965 | 23.3948 | 2.5591   | 5.00E-05 | 0.0249845 |



|         |         |             |                     |                |                 |         |         |          |          |           |
|---------|---------|-------------|---------------------|----------------|-----------------|---------|---------|----------|----------|-----------|
| RNA-Seq | Trinity | XLOC_031087 | c35279_g1_i1:2-772  | cdRNA03-Dia-R2 | cdRNA05-postDia | 13.7303 | 60.6976 | 2.14428  | 0.0001   | 0.0432976 |
| RNA-Seq | Trinity | XLOC_031087 | c35279_g1_i1:2-772  | cdRNA02-Dia-R1 | cdRNA05-postDia | 11.4618 | 60.6976 | 2.40481  | 5.00E-05 | 0.0249845 |
| RNA-Seq | Trinity | XLOC_031315 | c35496_g1_i1:0-1663 | cdRNA01-preDia | cdRNA05-postDia | 9.47902 | 1.17463 | -3.01253 | 5.00E-05 | 0.0249845 |
| RNA-Seq | Trinity | XLOC_031315 | c35496_g1_i1:0-1663 | cdRNA02-Dia-R1 | cdRNA05-postDia | 8.79104 | 1.17463 | -2.90383 | 5.00E-05 | 0.0249845 |
| RNA-Seq | Trinity | XLOC_031507 | c35681_g1_i1:0-692  | cdRNA02-Dia-R1 | cdRNA05-postDia | 18.5991 | 2.77676 | -2.74375 | 5.00E-05 | 0.0249845 |
| RNA-Seq | Trinity | XLOC_031531 | c35703_g1_i1:0-934  | cdRNA01-preDia | cdRNA04-Dia-R3  | 41.9494 | 3.27109 | -3.6808  | 5.00E-05 | 0.0249845 |
| RNA-Seq | Trinity | XLOC_031531 | c35703_g1_i1:0-934  | cdRNA01-preDia | cdRNA03-Dia-R2  | 41.9494 | 3.62064 | -3.53433 | 5.00E-05 | 0.0249845 |
| RNA-Seq | Trinity | XLOC_031531 | c35703_g1_i1:0-934  | cdRNA02-Dia-R1 | cdRNA03-Dia-R2  | 21.9726 | 3.62064 | -2.60139 | 5.00E-05 | 0.0249845 |
| RNA-Seq | Trinity | XLOC_031584 | c35759_g1_i1:0-361  | cdRNA01-preDia | cdRNA05-postDia | 11.2877 | 72.3594 | 2.68043  | 5.00E-05 | 0.0249845 |
| RNA-Seq | Trinity | XLOC_031627 | c357_g1_i1:0-501    | cdRNA02-Dia-R1 | cdRNA05-postDia | 36.972  | 298.033 | 3.01096  | 5.00E-05 | 0.0249845 |
| RNA-Seq | Trinity | XLOC_031627 | c357_g1_i1:0-501    | cdRNA03-Dia-R2 | cdRNA05-postDia | 27.8923 | 298.033 | 3.41753  | 5.00E-05 | 0.0249845 |
| RNA-Seq | Trinity | XLOC_031627 | c357_g1_i1:0-501    | cdRNA04-Dia-R3 | cdRNA05-postDia | 26.6719 | 298.033 | 3.48208  | 5.00E-05 | 0.0249845 |
| RNA-Seq | Trinity | XLOC_031627 | c357_g1_i1:0-501    | cdRNA01-preDia | cdRNA05-postDia | 25.2774 | 298.033 | 3.55955  | 5.00E-05 | 0.0249845 |
| RNA-Seq | Trinity | XLOC_031868 | c36033_g1_i1:1-465  | cdRNA04-Dia-R3 | cdRNA05-postDia | 24.3447 | 139.948 | 2.52321  | 5.00E-05 | 0.0249845 |
| RNA-Seq | Trinity | XLOC_031868 | c36033_g1_i1:1-465  | cdRNA03-Dia-R1 | cdRNA05-postDia | 23.8202 | 139.948 | 2.55463  | 0.0001   | 0.0432976 |
| RNA-Seq | Trinity | XLOC_031868 | c36033_g1_i1:1-465  | cdRNA02-Dia-R2 | cdRNA05-postDia | 22.8906 | 139.948 | 2.61206  | 5.00E-05 | 0.0249845 |
| RNA-Seq | Trinity | XLOC_031868 | c36033_g1_i1:1-465  | cdRNA01-preDia | cdRNA05-postDia | 18.9963 | 139.948 | 2.8811   | 5.00E-05 | 0.0249845 |
| RNA-Seq | Trinity | XLOC_032816 | c369_g1_i1:0-1207   | cdRNA01-preDia | cdRNA05-postDia | 13.8279 | 91.4723 | 2.72576  | 5.00E-05 | 0.0249845 |
| RNA-Seq | Trinity | XLOC_033129 | c37307_g1_i1:0-819  | cdRNA01-preDia | cdRNA05-postDia | 46.7737 | 268.162 | 2.51934  | 5.00E-05 | 0.0249845 |
| RNA-Seq | Trinity | XLOC_033129 | c37307_g1_i1:0-819  | cdRNA04-Dia-R3 | cdRNA05-postDia | 23.3581 | 268.162 | 3.52111  | 5.00E-05 | 0.0249845 |
| RNA-Seq | Trinity | XLOC_033129 | c37307_g1_i1:0-819  | cdRNA03-Dia-R2 | cdRNA05-postDia | 22.8994 | 268.162 | 3.54972  | 5.00E-05 | 0.0249845 |
| RNA-Seq | Trinity | XLOC_033129 | c37307_g1_i1:0-819  | cdRNA02-Dia-R1 | cdRNA05-postDia | 19.5488 | 268.162 | 3.77795  | 5.00E-05 | 0.0249845 |
| RNA-Seq | Trinity | XLOC_033437 | c37615_g1_i1:0-643  | cdRNA03-Dia-R2 | cdRNA05-postDia | 4.04367 | 22.1515 | 2.45367  | 0.0001   | 0.0432976 |
| RNA-Seq | Trinity | XLOC_033737 | c37912_g1_i1:0-469  | cdRNA03-Dia-R2 | cdRNA05-postDia | 4.16804 | 31.883  | 2.93535  | 5.00E-05 | 0.0249845 |
| RNA-Seq | Trinity | XLOC_033737 | c37912_g1_i1:0-469  | cdRNA04-Dia-R3 | cdRNA05-postDia | 4.00474 | 31.883  | 2.99301  | 0.0001   | 0.0432976 |
| RNA-Seq | Trinity | XLOC_033784 | c37956_g1_i1:0-221  | cdRNA01-preDia | cdRNA03-Dia-R2  | 537.548 | 96.9395 | -2.47124 | 5.00E-05 | 0.0249845 |
| RNA-Seq | Trinity | XLOC_033784 | c37956_g1_i1:0-221  | cdRNA04-Dia-R3 | cdRNA05-postDia | 128.67  | 708.788 | 2.46168  | 5.00E-05 | 0.0249845 |
| RNA-Seq | Trinity | XLOC_033784 | c37956_g1_i1:0-221  | cdRNA03-Dia-R2 | cdRNA05-postDia | 96.9395 | 708.788 | 2.8702   | 5.00E-05 | 0.0249845 |
| RNA-Seq | Trinity | XLOC_034287 | c3843_g1_i1:0-428   | cdRNA03-Dia-R2 | cdRNA05-postDia | 14.4402 | 77.0367 | 2.41545  | 0.0001   | 0.0432976 |
| RNA-Seq | Trinity | XLOC_034733 | c38870_g1_i1:0-1055 | cdRNA02-Dia-R1 | cdRNA05-postDia | 6.71409 | 37.373  | 2.47673  | 5.00E-05 | 0.0249845 |
| RNA-Seq | Trinity | XLOC_035227 | c3935_g1_i1:0-425   | cdRNA03-Dia-R2 | cdRNA05-postDia | 8.74592 | 58.0651 | 2.73099  | 0.0001   | 0.0432976 |
| RNA-Seq | Trinity | XLOC_035227 | c3935_g1_i1:0-425   | cdRNA04-Dia-R3 | cdRNA05-postDia | 7.71728 | 58.0651 | 2.91151  | 5.00E-05 | 0.0249845 |
| RNA-Seq | Trinity | XLOC_035227 | c3935_g1_i1:0-425   | cdRNA01-preDia | cdRNA05-postDia | 2.68172 | 58.0651 | 4.43644  | 5.00E-05 | 0.0249845 |
| RNA-Seq | Trinity | XLOC_035568 | c39695_g1_i1:0-265  | cdRNA04-Dia-R3 | cdRNA05-postDia | 18.3514 | 136.21  | 2.89187  | 5.00E-05 | 0.0249845 |
| RNA-Seq | Trinity | XLOC_035568 | c39695_g1_i1:0-265  | cdRNA02-Dia-R1 | cdRNA05-postDia | 12.2893 | 136.21  | 3.47036  | 5.00E-05 | 0.0249845 |
| RNA-Seq | Trinity | XLOC_035568 | c39695_g1_i1:0-265  | cdRNA03-Dia-R2 | cdRNA05-postDia | 8.98811 | 136.21  | 3.92167  | 0.0001   | 0.0432976 |
| RNA-Seq | Trinity | XLOC_035780 | c39909_g1_i1:0-705  | cdRNA01-preDia | cdRNA05-postDia | 6.78272 | 35.0817 | 2.37078  | 0.0001   | 0.0432976 |
| RNA-Seq | Trinity | XLOC_035780 | c39909_g1_i1:0-705  | cdRNA02-Dia-R1 | cdRNA05-postDia | 3.97968 | 35.0817 | 3.13999  | 5.00E-05 | 0.0249845 |
| RNA-Seq | Trinity | XLOC_035941 | c40061_g1_i1:0-443  | cdRNA01-preDia | cdRNA05-postDia | 31.4114 | 156.413 | 2.316    | 0.0001   | 0.0432976 |
| RNA-Seq | Trinity | XLOC_035941 | c40061_g1_i1:0-443  | cdRNA02-Dia-R1 | cdRNA05-postDia | 23.6567 | 156.413 | 2.72504  | 5.00E-05 | 0.0249845 |
| RNA-Seq | Trinity | XLOC_036519 | c40664_g1_i1:0-720  | cdRNA03-Dia-R2 | cdRNA05-postDia | 6.42184 | 39.0824 | 2.60546  | 5.00E-05 | 0.0249845 |
| RNA-Seq | Trinity | XLOC_036519 | c40664_g1_i1:0-720  | cdRNA04-Dia-R3 | cdRNA05-postDia | 5.94987 | 39.0824 | 2.71559  | 5.00E-05 | 0.0249845 |
| RNA-Seq | Trinity | XLOC_036519 | c40664_g1_i1:0-720  | cdRNA02-Dia-R1 | cdRNA05-postDia | 5.53647 | 39.0824 | 2.81948  | 5.00E-05 | 0.0249845 |
| RNA-Seq | Trinity | XLOC_036732 | c40895_g1_i1:2-588  | cdRNA01-preDia | cdRNA03-Dia-R2  | 5.06842 | 44.4049 | 3.13111  | 5.00E-05 | 0.0249845 |
| RNA-Seq | Trinity | XLOC_036732 | c40895_g1_i1:2-588  | cdRNA01-preDia | cdRNA04-Dia-R3  | 5.06842 | 45.8403 | 3.17701  | 5.00E-05 | 0.0249845 |
| RNA-Seq | Trinity | XLOC_036944 | c41115_g1_i1:0-474  | cdRNA03-Dia-R2 | cdRNA05-postDia | 15.0485 | 83.2502 | 2.46783  | 5.00E-05 | 0.0249845 |
| RNA-Seq | Trinity | XLOC_036944 | c41115_g1_i1:0-474  | cdRNA01-preDia | cdRNA05-postDia | 5.26832 | 83.2502 | 3.98204  | 5.00E-05 | 0.0249845 |

|         |         |             |                     |                |                 |         |         |          |          |           |
|---------|---------|-------------|---------------------|----------------|-----------------|---------|---------|----------|----------|-----------|
| RNA-Seq | Trinity | XLOC_037379 | c41567_g1_i1:0-524  | cdRNA04-Dia-R3 | cdRNA05-postDia | 5.09312 | 35.6196 | 2.80605  | 0.0001   | 0.0432976 |
| RNA-Seq | Trinity | XLOC_037379 | c41567_g1_i1:0-524  | cdRNA03-Dia-R2 | cdRNA05-postDia | 4.68443 | 35.6196 | 2.92673  | 0.0001   | 0.0432976 |
| RNA-Seq | Trinity | XLOC_037379 | c41567_g1_i1:0-524  | cdRNA02-Dia-R1 | cdRNA05-postDia | 4.46371 | 35.6196 | 2.99636  | 5.00E-05 | 0.0249845 |
| RNA-Seq | Trinity | XLOC_037470 | c41662_g1_i1:12-234 | cdRNA01-preDia | cdRNA04-Dia-R3  | 19.7205 | 185.385 | 3.23275  | 5.00E-05 | 0.0249845 |
| RNA-Seq | Trinity | XLOC_038360 | c42648_g1_i1:0-522  | cdRNA01-preDia | cdRNA04-Dia-R3  | 4.8459  | 31.8236 | 2.71526  | 5.00E-05 | 0.0249845 |
| RNA-Seq | Trinity | XLOC_038360 | c42648_g1_i1:0-522  | cdRNA01-preDia | cdRNA05-postDia | 4.8459  | 33.0864 | 2.7714   | 5.00E-05 | 0.0249845 |
| RNA-Seq | Trinity | XLOC_038360 | c42648_g1_i1:0-522  | cdRNA01-preDia | cdRNA03-Dia-R2  | 4.8459  | 33.9896 | 2.81026  | 5.00E-05 | 0.0249845 |
| RNA-Seq | Trinity | XLOC_038410 | c42692_g1_i1:0-1792 | cdRNA01-preDia | cdRNA04-Dia-R3  | 22.0213 | 180.376 | 3.03403  | 5.00E-05 | 0.0249845 |
| RNA-Seq | Trinity | XLOC_038410 | c42692_g1_i1:0-1792 | cdRNA01-preDia | cdRNA03-Dia-R2  | 22.0213 | 191.532 | 3.12061  | 5.00E-05 | 0.0249845 |
| RNA-Seq | Trinity | XLOC_038496 | c42774_g1_i1:0-357  | cdRNA03-Dia-R2 | cdRNA05-postDia | 169.233 | 16.6046 | -3.34935 | 5.00E-05 | 0.0249845 |
| RNA-Seq | Trinity | XLOC_038496 | c42774_g1_i1:0-357  | cdRNA04-Dia-R3 | cdRNA05-postDia | 156.927 | 16.6046 | -3.24044 | 5.00E-05 | 0.0249845 |
| RNA-Seq | Trinity | XLOC_038496 | c42774_g1_i1:0-357  | cdRNA02-Dia-R1 | cdRNA04-Dia-R3  | 27.8961 | 156.927 | 2.49196  | 5.00E-05 | 0.0249845 |
| RNA-Seq | Trinity | XLOC_038496 | c42774_g1_i1:0-357  | cdRNA02-Dia-R1 | cdRNA03-Dia-R2  | 27.8961 | 169.233 | 2.60087  | 5.00E-05 | 0.0249845 |
| RNA-Seq | Trinity | XLOC_038496 | c42774_g1_i1:0-357  | cdRNA01-preDia | cdRNA04-Dia-R3  | 13.3757 | 156.927 | 3.55241  | 5.00E-05 | 0.0249845 |
| RNA-Seq | Trinity | XLOC_038496 | c42774_g1_i1:0-357  | cdRNA01-preDia | cdRNA03-Dia-R2  | 13.3757 | 169.233 | 3.66132  | 5.00E-05 | 0.0249845 |
| RNA-Seq | Trinity | XLOC_038700 | c42959_g1_i1:0-867  | cdRNA01-preDia | cdRNA03-Dia-R2  | 11.86   | 1.60651 | -2.88411 | 0.0001   | 0.0432976 |
| RNA-Seq | Trinity | XLOC_038883 | c43131_g1_i1:0-412  | cdRNA04-Dia-R3 | cdRNA05-postDia | 7.46987 | 63.0279 | 3.07684  | 5.00E-05 | 0.0249845 |
| RNA-Seq | Trinity | XLOC_038883 | c43131_g1_i1:0-412  | cdRNA03-Dia-R2 | cdRNA05-postDia | 4.55091 | 63.0279 | 3.79176  | 5.00E-05 | 0.0249845 |
| RNA-Seq | Trinity | XLOC_038914 | c43160_g1_i1:1-2457 | cdRNA04-Dia-R3 | cdRNA05-postDia | 5.04933 | 31.0597 | 2.62088  | 5.00E-05 | 0.0249845 |
| RNA-Seq | Trinity | XLOC_038914 | c43160_g1_i1:1-2457 | cdRNA03-Dia-R2 | cdRNA05-postDia | 4.78225 | 31.0597 | 2.69928  | 5.00E-05 | 0.0249845 |
| RNA-Seq | Trinity | XLOC_039214 | c43436_g1_i1:0-1125 | cdRNA04-Dia-R3 | cdRNA05-postDia | 10.7413 | 65.9926 | 2.61913  | 5.00E-05 | 0.0249845 |
| RNA-Seq | Trinity | XLOC_039214 | c43436_g1_i1:0-1125 | cdRNA03-Dia-R2 | cdRNA05-postDia | 10.2798 | 65.9926 | 2.68249  | 5.00E-05 | 0.0249845 |
| RNA-Seq | Trinity | XLOC_039425 | c43639_g1_i1:0-301  | cdRNA01-preDia | cdRNA04-Dia-R3  | 43.1419 | 221.59  | 2.36073  | 0.0001   | 0.0432976 |
| RNA-Seq | Trinity | XLOC_039576 | c4377_g1_i1:0-1274  | cdRNA01-preDia | cdRNA04-Dia-R3  | 12.6297 | 1.4878  | -3.08557 | 5.00E-05 | 0.0249845 |
| RNA-Seq | Trinity | XLOC_039576 | c4377_g1_i1:0-1274  | cdRNA04-Dia-R3 | cdRNA05-postDia | 1.4878  | 13.4837 | 3.17997  | 5.00E-05 | 0.0249845 |
| RNA-Seq | Trinity | XLOC_039666 | c43862_g1_i1:0-297  | cdRNA04-Dia-R3 | cdRNA05-postDia | 21.0618 | 116.474 | 2.4673   | 5.00E-05 | 0.0249845 |
| RNA-Seq | Trinity | XLOC_039666 | c43862_g1_i1:0-297  | cdRNA03-Dia-R2 | cdRNA05-postDia | 16.2375 | 116.474 | 2.8426   | 5.00E-05 | 0.0249845 |
| RNA-Seq | Trinity | XLOC_039839 | c44026_g1_i1:0-770  | cdRNA03-Dia-R2 | cdRNA05-postDia | 7.1091  | 39.7844 | 2.48446  | 5.00E-05 | 0.0249845 |
| RNA-Seq | Trinity | XLOC_039853 | c44040_g1_i1:0-1071 | cdRNA04-Dia-R3 | cdRNA05-postDia | 14.2083 | 100.442 | 2.82157  | 5.00E-05 | 0.0249845 |
| RNA-Seq | Trinity | XLOC_039853 | c44040_g1_i1:0-1071 | cdRNA03-Dia-R2 | cdRNA05-postDia | 13.5136 | 100.442 | 2.89388  | 5.00E-05 | 0.0249845 |
| RNA-Seq | Trinity | XLOC_039853 | c44040_g1_i1:0-1071 | cdRNA02-Dia-R1 | cdRNA05-postDia | 12.7342 | 100.442 | 2.97959  | 5.00E-05 | 0.0249845 |
| RNA-Seq | Trinity | XLOC_039874 | c44059_g1_i1:0-373  | cdRNA01-preDia | cdRNA05-postDia | 6.76759 | 59.3162 | 3.13171  | 5.00E-05 | 0.0249845 |
| RNA-Seq | Trinity | XLOC_040030 | c44207_g1_i1:0-2163 | cdRNA01-preDia | cdRNA04-Dia-R3  | 12.0015 | 2.24442 | -2.4188  | 5.00E-05 | 0.0249845 |
| RNA-Seq | Trinity | XLOC_040030 | c44207_g1_i1:0-2163 | cdRNA01-preDia | cdRNA03-Dia-R2  | 12.0015 | 2.27553 | -2.39894 | 5.00E-05 | 0.0249845 |
| RNA-Seq | Trinity | XLOC_040030 | c44207_g1_i1:0-2163 | cdRNA02-Dia-R1 | cdRNA05-postDia | 3.53949 | 19.7345 | 2.4791   | 0.0001   | 0.0432976 |
| RNA-Seq | Trinity | XLOC_040030 | c44207_g1_i1:0-2163 | cdRNA03-Dia-R2 | cdRNA05-postDia | 2.27553 | 19.7345 | 3.11644  | 5.00E-05 | 0.0249845 |
| RNA-Seq | Trinity | XLOC_040030 | c44207_g1_i1:0-2163 | cdRNA04-Dia-R3 | cdRNA05-postDia | 2.24442 | 19.7345 | 3.1363   | 5.00E-05 | 0.0249845 |
| RNA-Seq | Trinity | XLOC_040177 | c44342_g1_i1:0-662  | cdRNA04-Dia-R3 | cdRNA05-postDia | 15.8894 | 110.166 | 2.79354  | 5.00E-05 | 0.0249845 |
| RNA-Seq | Trinity | XLOC_040177 | c44342_g1_i1:0-662  | cdRNA03-Dia-R2 | cdRNA05-postDia | 14.5563 | 110.166 | 2.91997  | 5.00E-05 | 0.0249845 |
| RNA-Seq | Trinity | XLOC_040252 | c44411_g1_i1:0-585  | cdRNA04-Dia-R3 | cdRNA05-postDia | 5.4715  | 40.2728 | 2.8798   | 5.00E-05 | 0.0249845 |
| RNA-Seq | Trinity | XLOC_040275 | c44433_g1_i1:0-1046 | cdRNA04-Dia-R3 | cdRNA05-postDia | 51.2279 | 346.579 | 2.75818  | 0.0001   | 0.0432976 |
| RNA-Seq | Trinity | XLOC_040275 | c44433_g1_i1:0-1046 | cdRNA03-Dia-R2 | cdRNA05-postDia | 51.2085 | 346.579 | 2.75873  | 0.0001   | 0.0432976 |
| RNA-Seq | Trinity | XLOC_040300 | c44456_g1_i1:0-572  | cdRNA04-Dia-R3 | cdRNA05-postDia | 1.75093 | 21.2268 | 3.59969  | 0.0001   | 0.0432976 |
| RNA-Seq | Trinity | XLOC_040491 | c44630_g1_i1:0-981  | cdRNA01-preDia | cdRNA04-Dia-R3  | 1.67819 | 14.1466 | 3.07548  | 5.00E-05 | 0.0249845 |
| RNA-Seq | Trinity | XLOC_040491 | c44630_g1_i1:0-981  | cdRNA01-preDia | cdRNA03-Dia-R2  | 1.67819 | 15.2312 | 3.18205  | 5.00E-05 | 0.0249845 |
| RNA-Seq | Trinity | XLOC_040588 | c44719_g1_i1:1-1605 | cdRNA03-Dia-R2 | cdRNA05-postDia | 57.6238 | 9.87844 | -2.54431 | 5.00E-05 | 0.0249845 |
| RNA-Seq | Trinity | XLOC_040588 | c44719_g1_i1:1-1605 | cdRNA04-Dia-R3 | cdRNA05-postDia | 57.0718 | 9.87844 | -2.53042 | 5.00E-05 | 0.0249845 |

|         |         |             |                     |                |                 |         |         |          |          |           |
|---------|---------|-------------|---------------------|----------------|-----------------|---------|---------|----------|----------|-----------|
| RNA-Seq | Trinity | XLOC_040877 | c44991_g1_i1:0-503  | cdRNA02-Dia-R1 | cdRNA05-postDia | 22.2936 | 119.029 | 2.41661  | 0.0001   | 0.0432976 |
| RNA-Seq | Trinity | XLOC_040887 | c45000_g1_i1:0-655  | cdRNA01-preDia | cdRNA05-postDia | 12.2657 | 68.4863 | 2.48118  | 5.00E-05 | 0.0249845 |
| RNA-Seq | Trinity | XLOC_040887 | c45000_g1_i1:0-655  | cdRNA04-Dia-R3 | cdRNA05-postDia | 8.4882  | 68.4863 | 3.01228  | 5.00E-05 | 0.0249845 |
| RNA-Seq | Trinity | XLOC_040887 | c45000_g1_i1:0-655  | cdRNA03-Dia-R2 | cdRNA05-postDia | 7.7847  | 68.4863 | 3.1371   | 5.00E-05 | 0.0249845 |
| RNA-Seq | Trinity | XLOC_041220 | c45312_g1_i1:0-584  | cdRNA02-Dia-R1 | cdRNA05-postDia | 9.24072 | 54.5376 | 2.56117  | 5.00E-05 | 0.0249845 |
| RNA-Seq | Trinity | XLOC_041379 | c45457_g1_i1:0-878  | cdRNA01-preDia | cdRNA02-Dia-R1  | 32.0095 | 292.333 | 3.19104  | 5.00E-05 | 0.0249845 |
| RNA-Seq | Trinity | XLOC_041379 | c45457_g1_i1:0-878  | cdRNA01-preDia | cdRNA05-postDia | 32.0095 | 560.098 | 4.12911  | 5.00E-05 | 0.0249845 |
| RNA-Seq | Trinity | XLOC_041413 | c45492_g1_i1:0-432  | cdRNA03-Dia-R2 | cdRNA05-postDia | 13.668  | 69.3935 | 2.344    | 0.0001   | 0.0432976 |
| RNA-Seq | Trinity | XLOC_041494 | c45568_g1_i1:0-602  | cdRNA01-preDia | cdRNA04-Dia-R3  | 215.138 | 14.6658 | -3.87473 | 5.00E-05 | 0.0249845 |
| RNA-Seq | Trinity | XLOC_041494 | c45568_g1_i1:0-602  | cdRNA01-preDia | cdRNA03-Dia-R2  | 215.138 | 15.7594 | -3.77097 | 5.00E-05 | 0.0249845 |
| RNA-Seq | Trinity | XLOC_041494 | c45568_g1_i1:0-602  | cdRNA01-preDia | cdRNA02-Dia-R1  | 215.138 | 26.0946 | -3.04344 | 5.00E-05 | 0.0249845 |
| RNA-Seq | Trinity | XLOC_041494 | c45568_g1_i1:0-602  | cdRNA01-preDia | cdRNA05-postDia | 215.138 | 29.5404 | -2.8645  | 5.00E-05 | 0.0249845 |
| RNA-Seq | Trinity | XLOC_041841 | c45897_g1_i1:1-202  | cdRNA04-Dia-R3 | cdRNA05-postDia | 51.8201 | 609.156 | 3.55523  | 5.00E-05 | 0.0249845 |
| RNA-Seq | Trinity | XLOC_041841 | c45897_g1_i1:1-202  | cdRNA03-Dia-R2 | cdRNA05-postDia | 48.4016 | 609.156 | 3.65368  | 5.00E-05 | 0.0249845 |
| RNA-Seq | Trinity | XLOC_041841 | c45897_g1_i1:1-202  | cdRNA01-preDia | cdRNA05-postDia | 41.5553 | 609.156 | 3.87371  | 5.00E-05 | 0.0249845 |
| RNA-Seq | Trinity | XLOC_041860 | c45914_g1_i1:0-3713 | cdRNA01-preDia | cdRNA04-Dia-R3  | 19.9654 | 3.79145 | -2.39668 | 0.0001   | 0.0432976 |
| RNA-Seq | Trinity | XLOC_041860 | c45914_g1_i1:0-3713 | cdRNA03-Dia-R2 | cdRNA05-postDia | 4.19338 | 26.7029 | 2.67081  | 0.0001   | 0.0432976 |
| RNA-Seq | Trinity | XLOC_041860 | c45914_g1_i1:0-3713 | cdRNA04-Dia-R3 | cdRNA05-postDia | 3.79145 | 26.7029 | 2.81618  | 5.00E-05 | 0.0249845 |
| RNA-Seq | Trinity | XLOC_041908 | c4595_g1_i1:1-2071  | cdRNA03-Dia-R2 | cdRNA05-postDia | 5.98291 | 31.0129 | 2.37395  | 5.00E-05 | 0.0249845 |
| RNA-Seq | Trinity | XLOC_041931 | c45981_g1_i1:0-459  | cdRNA02-Dia-R1 | cdRNA05-postDia | 16.9211 | 81.7392 | 2.27221  | 0.0001   | 0.0432976 |
| RNA-Seq | Trinity | XLOC_042045 | c46086_g1_i1:0-758  | cdRNA01-preDia | cdRNA02-Dia-R1  | 32.9516 | 1.61148 | -4.35389 | 5.00E-05 | 0.0249845 |
| RNA-Seq | Trinity | XLOC_042105 | c46141_g1_i1:0-480  | cdRNA02-Dia-R1 | cdRNA05-postDia | 2.372   | 27.4356 | 3.53187  | 0.0001   | 0.0432976 |
| RNA-Seq | Trinity | XLOC_042215 | c46248_g1_i1:0-330  | cdRNA03-Dia-R2 | cdRNA05-postDia | 9.89437 | 103.711 | 3.38982  | 5.00E-05 | 0.0249845 |
| RNA-Seq | Trinity | XLOC_042215 | c46248_g1_i1:0-330  | cdRNA04-Dia-R3 | cdRNA05-postDia | 8.91255 | 103.711 | 3.54059  | 5.00E-05 | 0.0249845 |
| RNA-Seq | Trinity | XLOC_042215 | c46248_g1_i1:0-330  | cdRNA02-Dia-R1 | cdRNA05-postDia | 7.23072 | 103.711 | 3.84229  | 5.00E-05 | 0.0249845 |
| RNA-Seq | Trinity | XLOC_042279 | c46307_g1_i1:0-709  | cdRNA01-preDia | cdRNA04-Dia-R3  | 77.6965 | 11.4084 | -2.76775 | 5.00E-05 | 0.0249845 |
| RNA-Seq | Trinity | XLOC_042279 | c46307_g1_i1:0-709  | cdRNA01-preDia | cdRNA03-Dia-R2  | 77.6965 | 12.5766 | -2.6271  | 5.00E-05 | 0.0249845 |
| RNA-Seq | Trinity | XLOC_042279 | c46307_g1_i1:0-709  | cdRNA03-Dia-R2 | cdRNA05-postDia | 12.5766 | 78.9992 | 2.65109  | 5.00E-05 | 0.0249845 |
| RNA-Seq | Trinity | XLOC_042279 | c46307_g1_i1:0-709  | cdRNA04-Dia-R3 | cdRNA05-postDia | 11.4084 | 78.9992 | 2.79174  | 5.00E-05 | 0.0249845 |
| RNA-Seq | Trinity | XLOC_042726 | c46721_g1_i1:0-211  | cdRNA01-preDia | cdRNA05-postDia | 52.6912 | 298.801 | 2.50355  | 0.0001   | 0.0432976 |
| RNA-Seq | Trinity | XLOC_042726 | c46721_g1_i1:0-211  | cdRNA02-Dia-R1 | cdRNA05-postDia | 43.2105 | 298.801 | 2.78973  | 5.00E-05 | 0.0249845 |
| RNA-Seq | Trinity | XLOC_042817 | c46806_g1_i1:0-880  | cdRNA01-preDia | cdRNA04-Dia-R3  | 1.4613  | 12.3353 | 3.07747  | 0.0001   | 0.0432976 |
| RNA-Seq | Trinity | XLOC_042817 | c46806_g1_i1:0-880  | cdRNA01-preDia | cdRNA03-Dia-R2  | 1.4613  | 13.7137 | 3.23029  | 5.00E-05 | 0.0249845 |
| RNA-Seq | Trinity | XLOC_042867 | c46853_g1_i1:0-1004 | cdRNA01-preDia | cdRNA05-postDia | 6.17401 | 32.0335 | 2.3753   | 0.0001   | 0.0432976 |
| RNA-Seq | Trinity | XLOC_043008 | c46983_g1_i1:0-206  | cdRNA01-preDia | cdRNA05-postDia | 66.1273 | 1042.81 | 3.97908  | 5.00E-05 | 0.0249845 |
| RNA-Seq | Trinity | XLOC_043008 | c46983_g1_i1:0-206  | cdRNA02-Dia-R1 | cdRNA05-postDia | 45.9713 | 1042.81 | 4.5036   | 5.00E-05 | 0.0249845 |
| RNA-Seq | Trinity | XLOC_043016 | c46990_g1_i1:0-280  | cdRNA02-Dia-R1 | cdRNA05-postDia | 18.0422 | 106.802 | 2.56549  | 0.0001   | 0.0432976 |
| RNA-Seq | Trinity | XLOC_043369 | c47323_g1_i1:0-557  | cdRNA01-preDia | cdRNA05-postDia | 43.0948 | 240.819 | 2.48237  | 5.00E-05 | 0.0249845 |
| RNA-Seq | Trinity | XLOC_043759 | c4767_g1_i1:0-324   | cdRNA01-preDia | cdRNA05-postDia | 15.5572 | 114.091 | 2.87453  | 5.00E-05 | 0.0249845 |
| RNA-Seq | Trinity | XLOC_043815 | c47730_g1_i1:3-617  | cdRNA03-Dia-R2 | cdRNA05-postDia | 41.4687 | 230.67  | 2.47574  | 0.0001   | 0.0432976 |
| RNA-Seq | Trinity | XLOC_043815 | c47730_g1_i1:3-617  | cdRNA02-Dia-R1 | cdRNA05-postDia | 40.0649 | 230.67  | 2.52542  | 0.0001   | 0.0432976 |
| RNA-Seq | Trinity | XLOC_043815 | c47730_g1_i1:3-617  | cdRNA01-preDia | cdRNA05-postDia | 36.14   | 230.67  | 2.67416  | 5.00E-05 | 0.0249845 |
| RNA-Seq | Trinity | XLOC_044040 | c47940_g1_i1:1-704  | cdRNA04-Dia-R3 | cdRNA05-postDia | 22.1037 | 3.3545  | -2.72011 | 5.00E-05 | 0.0249845 |
| RNA-Seq | Trinity | XLOC_044040 | c47940_g1_i1:1-704  | cdRNA03-Dia-R2 | cdRNA05-postDia | 20.2381 | 3.3545  | -2.5929  | 0.0001   | 0.0432976 |
| RNA-Seq | Trinity | XLOC_044040 | c47940_g1_i1:1-704  | cdRNA01-preDia | cdRNA03-Dia-R2  | 1.82125 | 20.2381 | 3.47407  | 5.00E-05 | 0.0249845 |
| RNA-Seq | Trinity | XLOC_044040 | c47940_g1_i1:1-704  | cdRNA01-preDia | cdRNA04-Dia-R3  | 1.82125 | 22.1037 | 3.60128  | 5.00E-05 | 0.0249845 |
| RNA-Seq | Trinity | XLOC_044094 | c47991_g1_i1:2-845  | cdRNA02-Dia-R1 | cdRNA05-postDia | 16.0669 | 119.003 | 2.88884  | 5.00E-05 | 0.0249845 |

|         |         |             |                     |                |                 |         |         |          |          |           |
|---------|---------|-------------|---------------------|----------------|-----------------|---------|---------|----------|----------|-----------|
| RNA-Seq | Trinity | XLOC_044094 | c47991_g1_i1:2-845  | cdRNA01-preDia | cdRNA05-postDia | 6.12181 | 119.003 | 4.2809   | 5.00E-05 | 0.0249845 |
| RNA-Seq | Trinity | XLOC_044094 | c47991_g1_i1:2-845  | cdRNA03-Dia-R2 | cdRNA05-postDia | 4.56839 | 119.003 | 4.70318  | 5.00E-05 | 0.0249845 |
| RNA-Seq | Trinity | XLOC_044094 | c47991_g1_i1:2-845  | cdRNA04-Dia-R3 | cdRNA05-postDia | 3.67761 | 119.003 | 5.01609  | 5.00E-05 | 0.0249845 |
| RNA-Seq | Trinity | XLOC_044353 | c48238_g1_i1:0-539  | cdRNA01-preDia | cdRNA04-Dia-R3  | 4.71795 | 34.0556 | 2.85166  | 5.00E-05 | 0.0249845 |
| RNA-Seq | Trinity | XLOC_044353 | c48238_g1_i1:0-539  | cdRNA01-preDia | cdRNA03-Dia-R2  | 4.71795 | 34.2667 | 2.86058  | 5.00E-05 | 0.0249845 |
| RNA-Seq | Trinity | XLOC_044397 | c48280_g1_i1:0-1143 | cdRNA03-Dia-R2 | cdRNA05-postDia | 7.56209 | 35.6532 | 2.23718  | 0.0001   | 0.0432976 |
| RNA-Seq | Trinity | XLOC_044397 | c48280_g1_i1:0-1143 | cdRNA04-Dia-R3 | cdRNA05-postDia | 6.5796  | 35.6532 | 2.43796  | 0.0001   | 0.0432976 |
| RNA-Seq | Trinity | XLOC_044397 | c48280_g1_i1:0-1143 | cdRNA01-preDia | cdRNA05-postDia | 6.18586 | 35.6532 | 2.52699  | 5.00E-05 | 0.0249845 |
| RNA-Seq | Trinity | XLOC_044397 | c48280_g1_i1:0-1143 | cdRNA02-Dia-R1 | cdRNA05-postDia | 4.31012 | 35.6532 | 3.04823  | 5.00E-05 | 0.0249845 |
| RNA-Seq | Trinity | XLOC_044500 | c48376_g1_i1:0-1113 | cdRNA01-preDia | cdRNA03-Dia-R2  | 9.75963 | 1.46822 | -2.73276 | 5.00E-05 | 0.0249845 |
| RNA-Seq | Trinity | XLOC_044500 | c48376_g1_i1:0-1113 | cdRNA01-preDia | cdRNA04-Dia-R3  | 9.75963 | 1.67905 | -2.53918 | 0.0001   | 0.0432976 |
| RNA-Seq | Trinity | XLOC_044614 | c48485_g1_i1:0-355  | cdRNA04-Dia-R3 | cdRNA05-postDia | 10.4965 | 62.8057 | 2.58099  | 0.0001   | 0.0432976 |
| RNA-Seq | Trinity | XLOC_044621 | c48492_g1_i1:0-298  | cdRNA01-preDia | cdRNA05-postDia | 13.2964 | 118.669 | 3.15784  | 5.00E-05 | 0.0249845 |
| RNA-Seq | Trinity | XLOC_044721 | c48587_g1_i1:2-589  | cdRNA01-preDia | cdRNA05-postDia | 12.5864 | 61.6026 | 2.29113  | 0.0001   | 0.0432976 |
| RNA-Seq | Trinity | XLOC_044721 | c48587_g1_i1:2-589  | cdRNA02-Dia-R1 | cdRNA05-postDia | 11.4216 | 61.6026 | 2.43123  | 5.00E-05 | 0.0249845 |
| RNA-Seq | Trinity | XLOC_044838 | c48696_g1_i1:2-374  | cdRNA03-Dia-R2 | cdRNA05-postDia | 97.7225 | 17.5202 | -2.47967 | 5.00E-05 | 0.0249845 |
| RNA-Seq | Trinity | XLOC_044838 | c48696_g1_i1:2-374  | cdRNA04-Dia-R3 | cdRNA05-postDia | 93.2183 | 17.5202 | -2.41159 | 5.00E-05 | 0.0249845 |
| RNA-Seq | Trinity | XLOC_044838 | c48696_g1_i1:2-374  | cdRNA01-preDia | cdRNA04-Dia-R3  | 12.6755 | 93.2183 | 2.87857  | 5.00E-05 | 0.0249845 |
| RNA-Seq | Trinity | XLOC_044838 | c48696_g1_i1:2-374  | cdRNA01-preDia | cdRNA03-Dia-R2  | 12.6755 | 97.7225 | 2.94665  | 5.00E-05 | 0.0249845 |
| RNA-Seq | Trinity | XLOC_045011 | c48858_g1_i1:0-637  | cdRNA02-Dia-R1 | cdRNA05-postDia | 26.5283 | 2.11699 | -3.64745 | 5.00E-05 | 0.0249845 |
| RNA-Seq | Trinity | XLOC_045156 | c48998_g1_i1:0-659  | cdRNA01-preDia | cdRNA04-Dia-R3  | 2.77895 | 17.2437 | 2.63346  | 0.0001   | 0.0432976 |
| RNA-Seq | Trinity | XLOC_045522 | c49346_g1_i1:0-430  | cdRNA01-preDia | cdRNA05-postDia | 4.54558 | 64.8933 | 3.83553  | 5.00E-05 | 0.0249845 |
| RNA-Seq | Trinity | XLOC_045837 | c49644_g1_i1:0-1846 | cdRNA02-Dia-R1 | cdRNA04-Dia-R3  | 14.4989 | 2.49305 | -2.53996 | 5.00E-05 | 0.0249845 |
| RNA-Seq | Trinity | XLOC_045837 | c49644_g1_i1:0-1846 | cdRNA02-Dia-R1 | cdRNA03-Dia-R2  | 14.4989 | 2.78691 | -2.37921 | 5.00E-05 | 0.0249845 |
| RNA-Seq | Trinity | XLOC_045837 | c49644_g1_i1:0-1846 | cdRNA01-preDia | cdRNA05-postDia | 3.00807 | 91.9685 | 4.93423  | 5.00E-05 | 0.0249845 |
| RNA-Seq | Trinity | XLOC_045837 | c49644_g1_i1:0-1846 | cdRNA03-Dia-R2 | cdRNA05-postDia | 2.78691 | 91.9685 | 5.0444   | 5.00E-05 | 0.0249845 |
| RNA-Seq | Trinity | XLOC_045837 | c49644_g1_i1:0-1846 | cdRNA04-Dia-R3 | cdRNA05-postDia | 2.49305 | 91.9685 | 5.20516  | 5.00E-05 | 0.0249845 |
| RNA-Seq | Trinity | XLOC_045923 | c49724_g1_i1:0-325  | cdRNA01-preDia | cdRNA05-postDia | 7.71902 | 57.7441 | 2.90318  | 5.00E-05 | 0.0249845 |
| RNA-Seq | Trinity | XLOC_045978 | c49778_g1_i1:0-344  | cdRNA02-Dia-R1 | cdRNA05-postDia | 15.8303 | 117.03  | 2.88612  | 5.00E-05 | 0.0249845 |
| RNA-Seq | Trinity | XLOC_045978 | c49778_g1_i1:0-344  | cdRNA03-Dia-R2 | cdRNA05-postDia | 12.0313 | 117.03  | 3.28201  | 5.00E-05 | 0.0249845 |
| RNA-Seq | Trinity | XLOC_045985 | c49784_g1_i1:0-1200 | cdRNA02-Dia-R1 | cdRNA05-postDia | 4.54152 | 23.2489 | 2.35592  | 5.00E-05 | 0.0249845 |
| RNA-Seq | Trinity | XLOC_045985 | c49784_g1_i1:0-1200 | cdRNA01-preDia | cdRNA05-postDia | 4.24496 | 23.2489 | 2.45334  | 5.00E-05 | 0.0249845 |
| RNA-Seq | Trinity | XLOC_045985 | c49784_g1_i1:0-1200 | cdRNA03-Dia-R2 | cdRNA05-postDia | 4.23799 | 23.2489 | 2.45571  | 5.00E-05 | 0.0249845 |
| RNA-Seq | Trinity | XLOC_046211 | c49997_g1_i1:0-877  | cdRNA01-preDia | cdRNA05-postDia | 7.22165 | 44.7702 | 2.63214  | 5.00E-05 | 0.0249845 |
| RNA-Seq | Trinity | XLOC_046364 | c50143_g1_i1:18-526 | cdRNA02-Dia-R1 | cdRNA05-postDia | 6.06907 | 47.4578 | 2.9671   | 5.00E-05 | 0.0249845 |
| RNA-Seq | Trinity | XLOC_046401 | c5017_g1_i1:0-1059  | cdRNA02-Dia-R1 | cdRNA05-postDia | 9.22349 | 41.7197 | 2.17734  | 0.0001   | 0.0432976 |
| RNA-Seq | Trinity | XLOC_046401 | c5017_g1_i1:0-1059  | cdRNA04-Dia-R3 | cdRNA05-postDia | 6.11772 | 41.7197 | 2.76966  | 5.00E-05 | 0.0249845 |
| RNA-Seq | Trinity | XLOC_046401 | c5017_g1_i1:0-1059  | cdRNA03-Dia-R2 | cdRNA05-postDia | 5.25984 | 41.7197 | 2.98764  | 5.00E-05 | 0.0249845 |
| RNA-Seq | Trinity | XLOC_047096 | c50846_g1_i1:0-342  | cdRNA04-Dia-R3 | cdRNA05-postDia | 115.567 | 20.6353 | -2.48555 | 5.00E-05 | 0.0249845 |
| RNA-Seq | Trinity | XLOC_047096 | c50846_g1_i1:0-342  | cdRNA03-Dia-R2 | cdRNA05-postDia | 109.216 | 20.6353 | -2.40401 | 0.0001   | 0.0432976 |
| RNA-Seq | Trinity | XLOC_047108 | c50857_g1_i1:1-722  | cdRNA02-Dia-R1 | cdRNA04-Dia-R3  | 16.8651 | 2.05277 | -3.0384  | 5.00E-05 | 0.0249845 |
| RNA-Seq | Trinity | XLOC_047108 | c50857_g1_i1:1-722  | cdRNA02-Dia-R1 | cdRNA05-postDia | 16.8651 | 116.866 | 2.79275  | 5.00E-05 | 0.0249845 |
| RNA-Seq | Trinity | XLOC_047108 | c50857_g1_i1:1-722  | cdRNA01-preDia | cdRNA05-postDia | 4.3564  | 116.866 | 4.74558  | 5.00E-05 | 0.0249845 |
| RNA-Seq | Trinity | XLOC_047108 | c50857_g1_i1:1-722  | cdRNA03-Dia-R2 | cdRNA05-postDia | 3.12841 | 116.866 | 5.22328  | 5.00E-05 | 0.0249845 |
| RNA-Seq | Trinity | XLOC_047108 | c50857_g1_i1:1-722  | cdRNA04-Dia-R3 | cdRNA05-postDia | 2.05277 | 116.866 | 5.83114  | 5.00E-05 | 0.0249845 |
| RNA-Seq | Trinity | XLOC_047186 | c50932_g1_i1:0-328  | cdRNA01-preDia | cdRNA05-postDia | 10.3745 | 64.6873 | 2.64044  | 0.0001   | 0.0432976 |
| RNA-Seq | Trinity | XLOC_047269 | c51012_g1_i1:0-211  | cdRNA03-Dia-R2 | cdRNA05-postDia | 490.977 | 75.586  | -2.69946 | 0.0001   | 0.0432976 |

|         |         |             |                     |                |                 |          |         |          |          |           |
|---------|---------|-------------|---------------------|----------------|-----------------|----------|---------|----------|----------|-----------|
| RNA-Seq | Trinity | XLOC_047528 | c5125_g1_i1:0-2955  | cdRNA03-Dia-R2 | cdRNA05-postDia | 17.0646  | 2.63675 | -2.69417 | 5.00E-05 | 0.0249845 |
| RNA-Seq | Trinity | XLOC_047528 | c5125_g1_i1:0-2955  | cdRNA04-Dia-R3 | cdRNA05-postDia | 16.7404  | 2.63675 | -2.6665  | 5.00E-05 | 0.0249845 |
| RNA-Seq | Trinity | XLOC_047528 | c5125_g1_i1:0-2955  | cdRNA01-preDia | cdRNA04-Dia-R3  | 2.34126  | 16.7404 | 2.83798  | 5.00E-05 | 0.0249845 |
| RNA-Seq | Trinity | XLOC_047528 | c5125_g1_i1:0-2955  | cdRNA01-preDia | cdRNA03-Dia-R2  | 2.34126  | 17.0646 | 2.86565  | 5.00E-05 | 0.0249845 |
| RNA-Seq | Trinity | XLOC_047644 | c51372_g1_i1:0-864  | cdRNA01-preDia | cdRNA04-Dia-R3  | 36.4004  | 4.47946 | -3.02256 | 5.00E-05 | 0.0249845 |
| RNA-Seq | Trinity | XLOC_047644 | c51372_g1_i1:0-864  | cdRNA01-preDia | cdRNA02-Dia-R1  | 36.4004  | 7.66512 | -2.24757 | 0.0001   | 0.0432976 |
| RNA-Seq | Trinity | XLOC_047644 | c51372_g1_i1:0-864  | cdRNA02-Dia-R1 | cdRNA05-postDia | 7.66512  | 47.524  | 2.63228  | 5.00E-05 | 0.0249845 |
| RNA-Seq | Trinity | XLOC_047644 | c51372_g1_i1:0-864  | cdRNA04-Dia-R3 | cdRNA05-postDia | 4.47946  | 47.524  | 3.40726  | 5.00E-05 | 0.0249845 |
| RNA-Seq | Trinity | XLOC_047644 | c51372_g1_i1:0-864  | cdRNA03-Dia-R2 | cdRNA05-postDia | 3.64601  | 47.524  | 3.70427  | 5.00E-05 | 0.0249845 |
| RNA-Seq | Trinity | XLOC_048049 | c5175_g1_i2:0-1340  | cdRNA01-preDia | cdRNA05-postDia | 0.869583 | 7.26236 | 3.06204  | 0.0001   | 0.0432976 |
| RNA-Seq | Trinity | XLOC_048097 | c51802_g1_i1:0-930  | cdRNA03-Dia-R2 | cdRNA05-postDia | 4.50998  | 26.0759 | 2.53153  | 5.00E-05 | 0.0249845 |
| RNA-Seq | Trinity | XLOC_048097 | c51802_g1_i1:0-930  | cdRNA04-Dia-R3 | cdRNA05-postDia | 3.1847   | 26.0759 | 3.03349  | 5.00E-05 | 0.0249845 |
| RNA-Seq | Trinity | XLOC_048158 | c51861_g1_i1:0-440  | cdRNA04-Dia-R3 | cdRNA05-postDia | 47.859   | 7.09258 | -2.75441 | 5.00E-05 | 0.0249845 |
| RNA-Seq | Trinity | XLOC_048158 | c51861_g1_i1:0-440  | cdRNA03-Dia-R2 | cdRNA05-postDia | 46.6347  | 7.09258 | -2.71702 | 5.00E-05 | 0.0249845 |
| RNA-Seq | Trinity | XLOC_049292 | c5295_g1_i1:0-394   | cdRNA02-Dia-R1 | cdRNA05-postDia | 11.8962  | 65.1963 | 2.45429  | 0.0001   | 0.0432976 |
| RNA-Seq | Trinity | XLOC_049303 | c52970_g1_i1:1-347  | cdRNA01-preDia | cdRNA03-Dia-R2  | 85.1525  | 13.5247 | -2.65445 | 5.00E-05 | 0.0249845 |
| RNA-Seq | Trinity | XLOC_049693 | c53345_g1_i1:0-497  | cdRNA04-Dia-R3 | cdRNA05-postDia | 36.0911  | 3.94459 | -3.1937  | 5.00E-05 | 0.0249845 |
| RNA-Seq | Trinity | XLOC_049693 | c53345_g1_i1:0-497  | cdRNA03-Dia-R2 | cdRNA05-postDia | 35.0048  | 3.94459 | -3.1496  | 5.00E-05 | 0.0249845 |
| RNA-Seq | Trinity | XLOC_049693 | c53345_g1_i1:0-497  | cdRNA01-preDia | cdRNA03-Dia-R2  | 5.1245   | 35.0048 | 2.77207  | 5.00E-05 | 0.0249845 |
| RNA-Seq | Trinity | XLOC_049693 | c53345_g1_i1:0-497  | cdRNA01-preDia | cdRNA04-Dia-R3  | 5.1245   | 36.0911 | 2.81616  | 5.00E-05 | 0.0249845 |
| RNA-Seq | Trinity | XLOC_050016 | c53657_g1_i1:0-1041 | cdRNA01-preDia | cdRNA05-postDia | 34.4152  | 3.76171 | -3.19358 | 5.00E-05 | 0.0249845 |
| RNA-Seq | Trinity | XLOC_050016 | c53657_g1_i1:0-1041 | cdRNA01-preDia | cdRNA02-Dia-R1  | 34.4152  | 5.65311 | -2.60593 | 5.00E-05 | 0.0249845 |
| RNA-Seq | Trinity | XLOC_050048 | c5368_g1_i1:0-447   | cdRNA01-preDia | cdRNA05-postDia | 3.90244  | 28.3732 | 2.86208  | 5.00E-05 | 0.0249845 |
| RNA-Seq | Trinity | XLOC_050107 | c5374_g1_i1:8-600   | cdRNA02-Dia-R1 | cdRNA05-postDia | 9.74047  | 70.9778 | 2.86531  | 5.00E-05 | 0.0249845 |
| RNA-Seq | Trinity | XLOC_050107 | c5374_g1_i1:8-600   | cdRNA03-Dia-R2 | cdRNA05-postDia | 7.72695  | 70.9778 | 3.1994   | 5.00E-05 | 0.0249845 |
| RNA-Seq | Trinity | XLOC_050107 | c5374_g1_i1:8-600   | cdRNA04-Dia-R3 | cdRNA05-postDia | 5.95891  | 70.9778 | 3.57425  | 5.00E-05 | 0.0249845 |
| RNA-Seq | Trinity | XLOC_050107 | c5374_g1_i1:8-600   | cdRNA01-preDia | cdRNA05-postDia | 5.09188  | 70.9778 | 3.8011   | 5.00E-05 | 0.0249845 |
| RNA-Seq | Trinity | XLOC_050115 | c53757_g1_i1:5-281  | cdRNA04-Dia-R3 | cdRNA05-postDia | 19.6386  | 176.28  | 3.1661   | 5.00E-05 | 0.0249845 |
| RNA-Seq | Trinity | XLOC_050115 | c53757_g1_i1:5-281  | cdRNA03-Dia-R2 | cdRNA05-postDia | 19.4424  | 176.28  | 3.18059  | 5.00E-05 | 0.0249845 |
| RNA-Seq | Trinity | XLOC_050335 | c53972_g1_i1:0-431  | cdRNA03-Dia-R2 | cdRNA05-postDia | 4.34436  | 31.6016 | 2.86278  | 5.00E-05 | 0.0249845 |
| RNA-Seq | Trinity | XLOC_050642 | c5427_g1_i1:0-743   | cdRNA03-Dia-R2 | cdRNA05-postDia | 3.7326   | 25.2882 | 2.76021  | 5.00E-05 | 0.0249845 |
| RNA-Seq | Trinity | XLOC_050924 | c54555_g1_i1:0-577  | cdRNA04-Dia-R3 | cdRNA05-postDia | 10.9745  | 50.646  | 2.2063   | 0.0001   | 0.0432976 |
| RNA-Seq | Trinity | XLOC_050924 | c54555_g1_i1:0-577  | cdRNA03-Dia-R2 | cdRNA05-postDia | 8.56647  | 50.646  | 2.56368  | 5.00E-05 | 0.0249845 |
| RNA-Seq | Trinity | XLOC_050949 | c54579_g1_i1:0-381  | cdRNA02-Dia-R1 | cdRNA05-postDia | 6.54873  | 45.2019 | 2.7871   | 5.00E-05 | 0.0249845 |
| RNA-Seq | Trinity | XLOC_050949 | c54579_g1_i1:0-381  | cdRNA04-Dia-R3 | cdRNA05-postDia | 5.13292  | 45.2019 | 3.13853  | 0.0001   | 0.0432976 |
| RNA-Seq | Trinity | XLOC_052179 | c55826_g1_i1:0-542  | cdRNA01-preDia | cdRNA05-postDia | 3.74086  | 42.2125 | 3.49623  | 5.00E-05 | 0.0249845 |
| RNA-Seq | Trinity | XLOC_052757 | c563_g1_i1:0-1350   | cdRNA01-preDia | cdRNA03-Dia-R2  | 10.0336  | 71.3593 | 2.83026  | 5.00E-05 | 0.0249845 |
| RNA-Seq | Trinity | XLOC_052757 | c563_g1_i1:0-1350   | cdRNA01-preDia | cdRNA04-Dia-R3  | 10.0336  | 73.0947 | 2.86492  | 5.00E-05 | 0.0249845 |
| RNA-Seq | Trinity | XLOC_054102 | c5779_g1_i1:0-2092  | cdRNA04-Dia-R3 | cdRNA05-postDia | 6.96639  | 40.4465 | 2.53753  | 5.00E-05 | 0.0249845 |
| RNA-Seq | Trinity | XLOC_054356 | c58067_g1_i1:1-266  | cdRNA01-preDia | cdRNA05-postDia | 37.1369  | 292.284 | 2.97645  | 5.00E-05 | 0.0249845 |
| RNA-Seq | Trinity | XLOC_054356 | c58067_g1_i1:1-266  | cdRNA04-Dia-R3 | cdRNA05-postDia | 22.1296  | 292.284 | 3.72332  | 5.00E-05 | 0.0249845 |
| RNA-Seq | Trinity | XLOC_054356 | c58067_g1_i1:1-266  | cdRNA03-Dia-R2 | cdRNA05-postDia | 19.6615  | 292.284 | 3.89393  | 5.00E-05 | 0.0249845 |
| RNA-Seq | Trinity | XLOC_054356 | c58067_g1_i1:1-266  | cdRNA02-Dia-R1 | cdRNA05-postDia | 17.3746  | 292.284 | 4.07232  | 5.00E-05 | 0.0249845 |
| RNA-Seq | Trinity | XLOC_054557 | c5830_g1_i2:0-1468  | cdRNA01-preDia | cdRNA05-postDia | 6.6586   | 90.1475 | 3.759    | 5.00E-05 | 0.0249845 |
| RNA-Seq | Trinity | XLOC_054557 | c5830_g1_i2:0-1468  | cdRNA02-Dia-R1 | cdRNA05-postDia | 2.87231  | 90.1475 | 4.97201  | 5.00E-05 | 0.0249845 |
| RNA-Seq | Trinity | XLOC_054758 | c58515_g1_i1:0-1096 | cdRNA04-Dia-R3 | cdRNA05-postDia | 118.979  | 15.1021 | -2.97789 | 5.00E-05 | 0.0249845 |
| RNA-Seq | Trinity | XLOC_054758 | c58515_g1_i1:0-1096 | cdRNA03-Dia-R2 | cdRNA05-postDia | 109.988  | 15.1021 | -2.86453 | 5.00E-05 | 0.0249845 |

|         |         |             |                     |                |                 |          |         |          |          |           |
|---------|---------|-------------|---------------------|----------------|-----------------|----------|---------|----------|----------|-----------|
| RNA-Seq | Trinity | XLOC_054781 | c58537_g1_i1:0-1049 | cdRNA04-Dia-R3 | cdRNA05-postDia | 129.858  | 24.7621 | -2.39073 | 0.0001   | 0.0432976 |
| RNA-Seq | Trinity | XLOC_054805 | c58557_g1_i1:0-709  | cdRNA04-Dia-R3 | cdRNA05-postDia | 173.753  | 31.4892 | -2.46411 | 5.00E-05 | 0.0249845 |
| RNA-Seq | Trinity | XLOC_055003 | c58743_g1_i1:0-1550 | cdRNA01-preDia | cdRNA03-Dia-R2  | 13.416   | 80.5687 | 2.58627  | 0.0001   | 0.0432976 |
| RNA-Seq | Trinity | XLOC_055003 | c58743_g1_i1:0-1550 | cdRNA01-preDia | cdRNA04-Dia-R3  | 13.416   | 86.2262 | 2.68418  | 5.00E-05 | 0.0249845 |
| RNA-Seq | Trinity | XLOC_055003 | c58743_g1_i1:0-1550 | cdRNA01-preDia | cdRNA02-Dia-R1  | 13.416   | 165.731 | 3.62682  | 5.00E-05 | 0.0249845 |
| RNA-Seq | Trinity | XLOC_055003 | c58743_g1_i1:0-1550 | cdRNA01-preDia | cdRNA05-postDia | 13.416   | 518.208 | 5.27151  | 5.00E-05 | 0.0249845 |
| RNA-Seq | Trinity | XLOC_055051 | c58787_g1_i1:0-1414 | cdRNA04-Dia-R3 | cdRNA05-postDia | 42.3203  | 3.75496 | -3.49448 | 5.00E-05 | 0.0249845 |
| RNA-Seq | Trinity | XLOC_055051 | c58787_g1_i1:0-1414 | cdRNA03-Dia-R2 | cdRNA05-postDia | 39.8076  | 3.75496 | -3.40617 | 5.00E-05 | 0.0249845 |
| RNA-Seq | Trinity | XLOC_055066 | c58801_g1_i1:1-2318 | cdRNA02-Dia-R1 | cdRNA05-postDia | 1.69006  | 8.77085 | 2.37564  | 5.00E-05 | 0.0249845 |
| RNA-Seq | Trinity | XLOC_055066 | c58801_g1_i1:1-2318 | cdRNA04-Dia-R3 | cdRNA05-postDia | 1.20187  | 8.77085 | 2.86744  | 0.0001   | 0.0432976 |
| RNA-Seq | Trinity | XLOC_055066 | c58801_g1_i1:1-2318 | cdRNA03-Dia-R2 | cdRNA05-postDia | 0.989497 | 8.77085 | 3.14795  | 5.00E-05 | 0.0249845 |
| RNA-Seq | Trinity | XLOC_055085 | c58820_g1_i1:0-340  | cdRNA01-preDia | cdRNA05-postDia | 79.8129  | 417.334 | 2.38651  | 5.00E-05 | 0.0249845 |
| RNA-Seq | Trinity | XLOC_055085 | c58820_g1_i1:0-340  | cdRNA02-Dia-R1 | cdRNA05-postDia | 73.3462  | 417.334 | 2.50841  | 5.00E-05 | 0.0249845 |
| RNA-Seq | Trinity | XLOC_055107 | c58841_g1_i1:0-849  | cdRNA03-Dia-R2 | cdRNA05-postDia | 9.66339  | 56.8474 | 2.55649  | 5.00E-05 | 0.0249845 |
| RNA-Seq | Trinity | XLOC_055107 | c58841_g1_i1:0-849  | cdRNA04-Dia-R3 | cdRNA05-postDia | 9.10849  | 56.8474 | 2.64181  | 5.00E-05 | 0.0249845 |
| RNA-Seq | Trinity | XLOC_055125 | c58857_g1_i1:8-2060 | cdRNA01-preDia | cdRNA02-Dia-R1  | 6.30771  | 33.7849 | 2.42119  | 0.0001   | 0.0432976 |
| RNA-Seq | Trinity | XLOC_055125 | c58857_g1_i1:8-2060 | cdRNA01-preDia | cdRNA04-Dia-R3  | 6.30771  | 46.8257 | 2.89211  | 5.00E-05 | 0.0249845 |
| RNA-Seq | Trinity | XLOC_055125 | c58857_g1_i1:8-2060 | cdRNA01-preDia | cdRNA03-Dia-R2  | 6.30771  | 47.0273 | 2.89831  | 5.00E-05 | 0.0249845 |
| RNA-Seq | Trinity | XLOC_055254 | c58977_g1_i1:0-643  | cdRNA02-Dia-R1 | cdRNA05-postDia | 22.0985  | 135.179 | 2.61285  | 5.00E-05 | 0.0249845 |
| RNA-Seq | Trinity | XLOC_055254 | c58977_g1_i1:0-643  | cdRNA03-Dia-R2 | cdRNA05-postDia | 15.9051  | 135.179 | 3.08731  | 5.00E-05 | 0.0249845 |
| RNA-Seq | Trinity | XLOC_055254 | c58977_g1_i1:0-643  | cdRNA04-Dia-R3 | cdRNA05-postDia | 13.9869  | 135.179 | 3.27272  | 5.00E-05 | 0.0249845 |
| RNA-Seq | Trinity | XLOC_055364 | c59077_g1_i1:0-640  | cdRNA03-Dia-R2 | cdRNA05-postDia | 4.61436  | 28.8854 | 2.64614  | 5.00E-05 | 0.0249845 |
| RNA-Seq | Trinity | XLOC_055364 | c59077_g1_i1:0-640  | cdRNA02-Dia-R1 | cdRNA05-postDia | 4.29995  | 28.8854 | 2.74795  | 5.00E-05 | 0.0249845 |
| RNA-Seq | Trinity | XLOC_055364 | c59077_g1_i1:0-640  | cdRNA01-preDia | cdRNA05-postDia | 1.26877  | 28.8854 | 4.50884  | 5.00E-05 | 0.0249845 |
| RNA-Seq | Trinity | XLOC_055436 | c59145_g1_i1:0-779  | cdRNA01-preDia | cdRNA03-Dia-R2  | 3307.79  | 208.769 | -3.98589 | 5.00E-05 | 0.0249845 |
| RNA-Seq | Trinity | XLOC_055436 | c59145_g1_i1:0-779  | cdRNA01-preDia | cdRNA04-Dia-R3  | 3307.79  | 229.198 | -3.8512  | 5.00E-05 | 0.0249845 |
| RNA-Seq | Trinity | XLOC_055436 | c59145_g1_i1:0-779  | cdRNA01-preDia | cdRNA05-postDia | 3307.79  | 333.672 | -3.30937 | 5.00E-05 | 0.0249845 |
| RNA-Seq | Trinity | XLOC_055581 | c59280_g1_i1:0-2175 | cdRNA03-Dia-R2 | cdRNA05-postDia | 437.684  | 58.0948 | -2.91341 | 5.00E-05 | 0.0249845 |
| RNA-Seq | Trinity | XLOC_055599 | c59297_g1_i1:0-571  | cdRNA03-Dia-R2 | cdRNA05-postDia | 626.224  | 53.1029 | -3.55982 | 5.00E-05 | 0.0249845 |
| RNA-Seq | Trinity | XLOC_055599 | c59297_g1_i1:0-571  | cdRNA04-Dia-R3 | cdRNA05-postDia | 615.528  | 53.1029 | -3.53496 | 5.00E-05 | 0.0249845 |
| RNA-Seq | Trinity | XLOC_055599 | c59297_g1_i1:0-571  | cdRNA02-Dia-R1 | cdRNA05-postDia | 308.691  | 53.1029 | -2.5393  | 5.00E-05 | 0.0249845 |
| RNA-Seq | Trinity | XLOC_055916 | c595_g1_i1:0-642    | cdRNA03-Dia-R2 | cdRNA05-postDia | 44.4018  | 3.36671 | -3.72121 | 5.00E-05 | 0.0249845 |
| RNA-Seq | Trinity | XLOC_055916 | c595_g1_i1:0-642    | cdRNA04-Dia-R3 | cdRNA05-postDia | 34.6144  | 3.36671 | -3.36196 | 5.00E-05 | 0.0249845 |
| RNA-Seq | Trinity | XLOC_055916 | c595_g1_i1:0-642    | cdRNA02-Dia-R1 | cdRNA05-postDia | 19.4313  | 3.36671 | -2.52897 | 0.0001   | 0.0432976 |
| RNA-Seq | Trinity | XLOC_055916 | c595_g1_i1:0-642    | cdRNA01-preDia | cdRNA04-Dia-R3  | 6.31489  | 34.6144 | 2.45454  | 5.00E-05 | 0.0249845 |
| RNA-Seq | Trinity | XLOC_055916 | c595_g1_i1:0-642    | cdRNA01-preDia | cdRNA03-Dia-R2  | 6.31489  | 44.4018 | 2.81379  | 5.00E-05 | 0.0249845 |
| RNA-Seq | Trinity | XLOC_055938 | c59619_g2_i1:0-1205 | cdRNA04-Dia-R3 | cdRNA05-postDia | 7.76242  | 40.6117 | 2.38732  | 0.0001   | 0.0432976 |
| RNA-Seq | Trinity | XLOC_056103 | c59775_g1_i1:0-1348 | cdRNA04-Dia-R3 | cdRNA05-postDia | 10.3042  | 51.3172 | 2.31621  | 0.0001   | 0.0432976 |
| RNA-Seq | Trinity | XLOC_056231 | c59894_g1_i1:22-947 | cdRNA01-preDia | cdRNA04-Dia-R3  | 5.37078  | 26.3377 | 2.29393  | 0.0001   | 0.0432976 |
| RNA-Seq | Trinity | XLOC_056231 | c59894_g1_i1:22-947 | cdRNA01-preDia | cdRNA03-Dia-R2  | 5.37078  | 26.5362 | 2.30476  | 0.0001   | 0.0432976 |
| RNA-Seq | Trinity | XLOC_056261 | c59921_g1_i1:0-256  | cdRNA01-preDia | cdRNA05-postDia | 291.686  | 1930.93 | 2.7268   | 5.00E-05 | 0.0249845 |
| RNA-Seq | Trinity | XLOC_056261 | c59921_g1_i1:0-256  | cdRNA02-Dia-R1 | cdRNA05-postDia | 225.792  | 1930.93 | 3.09623  | 5.00E-05 | 0.0249845 |
| RNA-Seq | Trinity | XLOC_056347 | c60000_g1_i1:1-1402 | cdRNA03-Dia-R2 | cdRNA05-postDia | 7.44818  | 42.0195 | 2.4961   | 5.00E-05 | 0.0249845 |
| RNA-Seq | Trinity | XLOC_056347 | c60000_g1_i1:1-1402 | cdRNA04-Dia-R3 | cdRNA05-postDia | 7.1247   | 42.0195 | 2.56016  | 5.00E-05 | 0.0249845 |
| RNA-Seq | Trinity | XLOC_056463 | c60109_g1_i1:0-592  | cdRNA04-Dia-R3 | cdRNA05-postDia | 9.08489  | 54.9539 | 2.59668  | 5.00E-05 | 0.0249845 |
| RNA-Seq | Trinity | XLOC_056463 | c60109_g1_i1:0-592  | cdRNA03-Dia-R2 | cdRNA05-postDia | 8.947    | 54.9539 | 2.61875  | 5.00E-05 | 0.0249845 |
| RNA-Seq | Trinity | XLOC_056464 | c6010_g1_i1:0-354   | cdRNA02-Dia-R1 | cdRNA05-postDia | 6.12201  | 48.6653 | 2.99081  | 5.00E-05 | 0.0249845 |

|         |         |             |                      |                |                 |         |         |          |          |           |
|---------|---------|-------------|----------------------|----------------|-----------------|---------|---------|----------|----------|-----------|
| RNA-Seq | Trinity | XLOC_056743 | c6036_g1_i1:0-562    | cdRNA03-Dia-R2 | cdRNA05-postDia | 8.37444 | 59.3362 | 2.82485  | 5.00E-05 | 0.0249845 |
| RNA-Seq | Trinity | XLOC_056743 | c6036_g1_i1:0-562    | cdRNA04-Dia-R3 | cdRNA05-postDia | 8.25808 | 59.3362 | 2.84503  | 5.00E-05 | 0.0249845 |
| RNA-Seq | Trinity | XLOC_056836 | c60456_g1_i1:0-742   | cdRNA01-preDia | cdRNA03-Dia-R2  | 3168.85 | 169.306 | -4.22626 | 5.00E-05 | 0.0249845 |
| RNA-Seq | Trinity | XLOC_056836 | c60456_g1_i1:0-742   | cdRNA01-preDia | cdRNA04-Dia-R3  | 3168.85 | 176.27  | -4.1681  | 5.00E-05 | 0.0249845 |
| RNA-Seq | Trinity | XLOC_056868 | c60487_g1_i1:0-885   | cdRNA01-preDia | cdRNA04-Dia-R3  | 55.4118 | 9.6845  | -2.51645 | 0.0001   | 0.0432976 |
| RNA-Seq | Trinity | XLOC_056868 | c60487_g1_i1:0-885   | cdRNA01-preDia | cdRNA03-Dia-R2  | 55.4118 | 10.8325 | -2.35483 | 0.0001   | 0.0432976 |
| RNA-Seq | Trinity | XLOC_056868 | c60487_g1_i1:0-885   | cdRNA03-Dia-R2 | cdRNA05-postDia | 10.8325 | 64.3766 | 2.57118  | 0.0001   | 0.0432976 |
| RNA-Seq | Trinity | XLOC_056900 | c60517_g1_i1:10-1823 | cdRNA01-preDia | cdRNA05-postDia | 58.743  | 11.9145 | -2.3017  | 0.0001   | 0.0432976 |
| RNA-Seq | Trinity | XLOC_056900 | c60517_g1_i1:10-1823 | cdRNA04-Dia-R3 | cdRNA05-postDia | 58.7045 | 11.9145 | -2.30075 | 0.0001   | 0.0432976 |
| RNA-Seq | Trinity | XLOC_057073 | c6067_g1_i1:0-1510   | cdRNA01-preDia | cdRNA05-postDia | 7.80597 | 47.1795 | 2.59551  | 5.00E-05 | 0.0249845 |
| RNA-Seq | Trinity | XLOC_057148 | c60749_g1_i1:0-826   | cdRNA04-Dia-R3 | cdRNA05-postDia | 7.0078  | 37.8045 | 2.43152  | 5.00E-05 | 0.0249845 |
| RNA-Seq | Trinity | XLOC_057148 | c60749_g1_i1:0-826   | cdRNA03-Dia-R2 | cdRNA05-postDia | 6.21538 | 37.8045 | 2.60464  | 5.00E-05 | 0.0249845 |
| RNA-Seq | Trinity | XLOC_057160 | c60760_g1_i1:0-548   | cdRNA01-preDia | cdRNA05-postDia | 11.0268 | 67.312  | 2.60984  | 5.00E-05 | 0.0249845 |
| RNA-Seq | Trinity | XLOC_057259 | c60852_g1_i1:0-842   | cdRNA01-preDia | cdRNA04-Dia-R3  | 14.6782 | 2.67341 | -2.45692 | 0.0001   | 0.0432976 |
| RNA-Seq | Trinity | XLOC_057941 | c614_g1_i1:0-1054    | cdRNA04-Dia-R3 | cdRNA05-postDia | 21.1812 | 3.28219 | -2.69006 | 5.00E-05 | 0.0249845 |
| RNA-Seq | Trinity | XLOC_057941 | c614_g1_i1:0-1054    | cdRNA03-Dia-R2 | cdRNA05-postDia | 20.0029 | 3.28219 | -2.60748 | 5.00E-05 | 0.0249845 |
| RNA-Seq | Trinity | XLOC_058031 | c61587_g1_i1:0-592   | cdRNA02-Dia-R1 | cdRNA05-postDia | 10.4307 | 100.047 | 3.26176  | 5.00E-05 | 0.0249845 |
| RNA-Seq | Trinity | XLOC_058031 | c61587_g1_i1:0-592   | cdRNA01-preDia | cdRNA05-postDia | 3.15697 | 100.047 | 4.98599  | 5.00E-05 | 0.0249845 |
| RNA-Seq | Trinity | XLOC_058031 | c61587_g1_i1:0-592   | cdRNA04-Dia-R3 | cdRNA05-postDia | 1.75837 | 100.047 | 5.8303   | 5.00E-05 | 0.0249845 |
| RNA-Seq | Trinity | XLOC_058031 | c61587_g1_i1:0-592   | cdRNA03-Dia-R2 | cdRNA05-postDia | 1.22004 | 100.047 | 6.3576   | 5.00E-05 | 0.0249845 |
| RNA-Seq | Trinity | XLOC_058114 | c61668_g1_i1:0-750   | cdRNA01-preDia | cdRNA05-postDia | 4.4145  | 26.4239 | 2.58152  | 0.0001   | 0.0432976 |
| RNA-Seq | Trinity | XLOC_058223 | c6176_g1_i1:0-1229   | cdRNA01-preDia | cdRNA05-postDia | 2.12025 | 14.6201 | 2.78564  | 5.00E-05 | 0.0249845 |
| RNA-Seq | Trinity | XLOC_058278 | c61822_g1_i1:0-641   | cdRNA04-Dia-R3 | cdRNA05-postDia | 9.36726 | 43.5026 | 2.2154   | 0.0001   | 0.0432976 |
| RNA-Seq | Trinity | XLOC_058278 | c61822_g1_i1:0-641   | cdRNA03-Dia-R2 | cdRNA05-postDia | 7.673   | 43.5026 | 2.50324  | 5.00E-05 | 0.0249845 |
| RNA-Seq | Trinity | XLOC_058289 | c61832_g1_i1:0-434   | cdRNA01-preDia | cdRNA04-Dia-R3  | 10.651  | 93.106  | 3.12788  | 5.00E-05 | 0.0249845 |
| RNA-Seq | Trinity | XLOC_058315 | c61855_g1_i1:0-694   | cdRNA04-Dia-R3 | cdRNA05-postDia | 2.62999 | 17.9753 | 2.77288  | 5.00E-05 | 0.0249845 |
| RNA-Seq | Trinity | XLOC_058315 | c61855_g1_i1:0-694   | cdRNA03-Dia-R2 | cdRNA05-postDia | 2.25419 | 17.9753 | 2.99533  | 5.00E-05 | 0.0249845 |
| RNA-Seq | Trinity | XLOC_058506 | c62037_g1_i1:0-2889  | cdRNA04-Dia-R3 | cdRNA05-postDia | 90.6582 | 10.3758 | -3.12721 | 5.00E-05 | 0.0249845 |
| RNA-Seq | Trinity | XLOC_058506 | c62037_g1_i1:0-2889  | cdRNA03-Dia-R2 | cdRNA05-postDia | 90.5055 | 10.3758 | -3.12478 | 5.00E-05 | 0.0249845 |
| RNA-Seq | Trinity | XLOC_058506 | c62037_g1_i1:0-2889  | cdRNA01-preDia | cdRNA03-Dia-R2  | 7.03455 | 90.5055 | 3.68548  | 5.00E-05 | 0.0249845 |
| RNA-Seq | Trinity | XLOC_058506 | c62037_g1_i1:0-2889  | cdRNA01-preDia | cdRNA04-Dia-R3  | 7.03455 | 90.6582 | 3.68791  | 5.00E-05 | 0.0249845 |
| RNA-Seq | Trinity | XLOC_058640 | c62160_g1_i1:7-449   | cdRNA03-Dia-R2 | cdRNA05-postDia | 141.215 | 813.482 | 2.52622  | 5.00E-05 | 0.0249845 |
| RNA-Seq | Trinity | XLOC_058640 | c62160_g1_i1:7-449   | cdRNA01-preDia | cdRNA05-postDia | 136.466 | 813.482 | 2.57556  | 5.00E-05 | 0.0249845 |
| RNA-Seq | Trinity | XLOC_058640 | c62160_g1_i1:7-449   | cdRNA04-Dia-R3 | cdRNA05-postDia | 132.815 | 813.482 | 2.61469  | 5.00E-05 | 0.0249845 |
| RNA-Seq | Trinity | XLOC_058663 | c62182_g1_i1:0-662   | cdRNA04-Dia-R3 | cdRNA05-postDia | 58.9231 | 330.671 | 2.48849  | 5.00E-05 | 0.0249845 |
| RNA-Seq | Trinity | XLOC_058663 | c62182_g1_i1:0-662   | cdRNA01-preDia | cdRNA05-postDia | 58.1483 | 330.671 | 2.50759  | 0.0001   | 0.0432976 |
| RNA-Seq | Trinity | XLOC_058663 | c62182_g1_i1:0-662   | cdRNA03-Dia-R2 | cdRNA05-postDia | 54.0046 | 330.671 | 2.61425  | 5.00E-05 | 0.0249845 |
| RNA-Seq | Trinity | XLOC_058680 | c62199_g1_i1:0-480   | cdRNA01-preDia | cdRNA04-Dia-R3  | 59.6982 | 7.27829 | -3.03601 | 5.00E-05 | 0.0249845 |
| RNA-Seq | Trinity | XLOC_058680 | c62199_g1_i1:0-480   | cdRNA01-preDia | cdRNA03-Dia-R2  | 59.6982 | 8.28971 | -2.84829 | 0.0001   | 0.0432976 |
| RNA-Seq | Trinity | XLOC_058716 | c62234_g1_i1:0-369   | cdRNA01-preDia | cdRNA05-postDia | 5.73421 | 45.7881 | 2.99731  | 5.00E-05 | 0.0249845 |
| RNA-Seq | Trinity | XLOC_058742 | c6225_g1_i1:0-1169   | cdRNA01-preDia | cdRNA03-Dia-R2  | 52.6168 | 334.151 | 2.6669   | 5.00E-05 | 0.0249845 |
| RNA-Seq | Trinity | XLOC_058857 | c62366_g1_i1:0-1569  | cdRNA03-Dia-R2 | cdRNA05-postDia | 2.22533 | 15.7378 | 2.82214  | 5.00E-05 | 0.0249845 |
| RNA-Seq | Trinity | XLOC_058857 | c62366_g1_i1:0-1569  | cdRNA04-Dia-R3 | cdRNA05-postDia | 2.22145 | 15.7378 | 2.82466  | 5.00E-05 | 0.0249845 |
| RNA-Seq | Trinity | XLOC_058898 | c62404_g1_i1:2-468   | cdRNA01-preDia | cdRNA05-postDia | 3.46864 | 37.7242 | 3.44305  | 5.00E-05 | 0.0249845 |
| RNA-Seq | Trinity | XLOC_058898 | c62404_g1_i1:2-468   | cdRNA01-preDia | cdRNA04-Dia-R3  | 3.46864 | 39.9273 | 3.52493  | 5.00E-05 | 0.0249845 |
| RNA-Seq | Trinity | XLOC_058898 | c62404_g1_i1:2-468   | cdRNA01-preDia | cdRNA02-Dia-R1  | 3.46864 | 39.98   | 3.52683  | 5.00E-05 | 0.0249845 |
| RNA-Seq | Trinity | XLOC_058898 | c62404_g1_i1:2-468   | cdRNA01-preDia | cdRNA03-Dia-R2  | 3.46864 | 43.2116 | 3.63897  | 5.00E-05 | 0.0249845 |

|         |         |             |                     |                |                 |         |         |          |          |           |
|---------|---------|-------------|---------------------|----------------|-----------------|---------|---------|----------|----------|-----------|
| RNA-Seq | Trinity | XLOC_058902 | c62408_g1_i1:0-909  | cdRNA03-Dia-R2 | cdRNA05-postDia | 1.67867 | 11.476  | 2.77323  | 0.0001   | 0.0432976 |
| RNA-Seq | Trinity | XLOC_059112 | c62603_g1_i1:2-1258 | cdRNA01-preDia | cdRNA05-postDia | 2.59169 | 14.3585 | 2.46994  | 5.00E-05 | 0.0249845 |
| RNA-Seq | Trinity | XLOC_059176 | c62668_g1_i1:0-2050 | cdRNA01-preDia | cdRNA04-Dia-R3  | 8.11258 | 56.2804 | 2.7944   | 5.00E-05 | 0.0249845 |
| RNA-Seq | Trinity | XLOC_059176 | c62668_g1_i1:0-2050 | cdRNA01-preDia | cdRNA03-Dia-R2  | 8.11258 | 57.1436 | 2.81636  | 5.00E-05 | 0.0249845 |
| RNA-Seq | Trinity | XLOC_059660 | c63130_g1_i1:0-488  | cdRNA04-Dia-R3 | cdRNA05-postDia | 2.13533 | 32.1357 | 3.91165  | 5.00E-05 | 0.0249845 |
| RNA-Seq | Trinity | XLOC_060172 | c63605_g1_i1:0-991  | cdRNA01-preDia | cdRNA05-postDia | 2.20915 | 17.9272 | 3.02059  | 5.00E-05 | 0.0249845 |
| RNA-Seq | Trinity | XLOC_060221 | c63652_g1_i1:0-408  | cdRNA04-Dia-R3 | cdRNA05-postDia | 8.73039 | 56.2517 | 2.68778  | 5.00E-05 | 0.0249845 |
| RNA-Seq | Trinity | XLOC_060221 | c63652_g1_i1:0-408  | cdRNA03-Dia-R2 | cdRNA05-postDia | 8.31308 | 56.2517 | 2.75844  | 5.00E-05 | 0.0249845 |
| RNA-Seq | Trinity | XLOC_060301 | c63730_g1_i1:0-302  | cdRNA04-Dia-R3 | cdRNA05-postDia | 391.907 | 54.5008 | -2.84616 | 5.00E-05 | 0.0249845 |
| RNA-Seq | Trinity | XLOC_060301 | c63730_g1_i1:0-302  | cdRNA03-Dia-R2 | cdRNA05-postDia | 352.39  | 54.5008 | -2.69282 | 5.00E-05 | 0.0249845 |
| RNA-Seq | Trinity | XLOC_060301 | c63730_g1_i1:0-302  | cdRNA01-preDia | cdRNA05-postDia | 305.156 | 54.5008 | -2.4852  | 0.0001   | 0.0432976 |
| RNA-Seq | Trinity | XLOC_060376 | c637_g1_i1:0-842    | cdRNA04-Dia-R3 | cdRNA05-postDia | 37.309  | 4.06046 | -3.19981 | 5.00E-05 | 0.0249845 |
| RNA-Seq | Trinity | XLOC_060376 | c637_g1_i1:0-842    | cdRNA03-Dia-R2 | cdRNA05-postDia | 29.5556 | 4.06046 | -2.86372 | 5.00E-05 | 0.0249845 |
| RNA-Seq | Trinity | XLOC_060376 | c637_g1_i1:0-842    | cdRNA02-Dia-R1 | cdRNA05-postDia | 24.8611 | 4.06046 | -2.61418 | 5.00E-05 | 0.0249845 |
| RNA-Seq | Trinity | XLOC_060521 | c63938_g1_i1:0-795  | cdRNA02-Dia-R1 | cdRNA05-postDia | 11.7826 | 109.651 | 3.2182   | 5.00E-05 | 0.0249845 |
| RNA-Seq | Trinity | XLOC_060521 | c63938_g1_i1:0-795  | cdRNA04-Dia-R2 | cdRNA05-postDia | 6.92644 | 109.651 | 3.98467  | 5.00E-05 | 0.0249845 |
| RNA-Seq | Trinity | XLOC_060521 | c63938_g1_i1:0-795  | cdRNA03-Dia-R3 | cdRNA05-postDia | 5.94065 | 109.651 | 4.20616  | 5.00E-05 | 0.0249845 |
| RNA-Seq | Trinity | XLOC_060521 | c63938_g1_i1:0-795  | cdRNA01-preDia | cdRNA05-postDia | 3.94466 | 109.651 | 4.79688  | 5.00E-05 | 0.0249845 |
| RNA-Seq | Trinity | XLOC_060563 | c63980_g1_i1:0-543  | cdRNA04-Dia-R3 | cdRNA05-postDia | 13.5286 | 69.1277 | 2.35325  | 0.0001   | 0.0432976 |
| RNA-Seq | Trinity | XLOC_060688 | c64095_g1_i1:0-299  | cdRNA02-Dia-R1 | cdRNA05-postDia | 51.4226 | 402.339 | 2.96794  | 5.00E-05 | 0.0249845 |
| RNA-Seq | Trinity | XLOC_060688 | c64095_g1_i1:0-299  | cdRNA04-Dia-R3 | cdRNA05-postDia | 47.1112 | 402.339 | 3.09427  | 5.00E-05 | 0.0249845 |
| RNA-Seq | Trinity | XLOC_060688 | c64095_g1_i1:0-299  | cdRNA03-Dia-R2 | cdRNA05-postDia | 37.8704 | 402.339 | 3.40927  | 5.00E-05 | 0.0249845 |
| RNA-Seq | Trinity | XLOC_060699 | c64103_g2_i1:2-424  | cdRNA01-preDia | cdRNA04-Dia-R3  | 44.9472 | 4.694   | -3.25934 | 5.00E-05 | 0.0249845 |
| RNA-Seq | Trinity | XLOC_060699 | c64103_g2_i1:2-424  | cdRNA01-preDia | cdRNA03-Dia-R2  | 44.9472 | 5.06635 | -3.14921 | 5.00E-05 | 0.0249845 |
| RNA-Seq | Trinity | XLOC_060883 | c64273_g1_i1:0-261  | cdRNA02-Dia-R1 | cdRNA05-postDia | 43.9117 | 385.53  | 3.13417  | 5.00E-05 | 0.0249845 |
| RNA-Seq | Trinity | XLOC_060883 | c64273_g1_i1:0-261  | cdRNA04-Dia-R3 | cdRNA05-postDia | 15.8184 | 385.53  | 4.60716  | 5.00E-05 | 0.0249845 |
| RNA-Seq | Trinity | XLOC_060883 | c64273_g1_i1:0-261  | cdRNA01-preDia | cdRNA05-postDia | 12.9569 | 385.53  | 4.89505  | 5.00E-05 | 0.0249845 |
| RNA-Seq | Trinity | XLOC_060883 | c64273_g1_i1:0-261  | cdRNA03-Dia-R2 | cdRNA05-postDia | 9.40769 | 385.53  | 5.35686  | 5.00E-05 | 0.0249845 |
| RNA-Seq | Trinity | XLOC_061316 | c64687_g1_i1:0-507  | cdRNA03-Dia-R2 | cdRNA05-postDia | 13.0191 | 69.4486 | 2.41532  | 5.00E-05 | 0.0249845 |
| RNA-Seq | Trinity | XLOC_061316 | c64687_g1_i1:0-507  | cdRNA02-Dia-R1 | cdRNA05-postDia | 12.4728 | 69.4486 | 2.47716  | 0.0001   | 0.0432976 |
| RNA-Seq | Trinity | XLOC_061514 | c64880_g1_i1:0-609  | cdRNA02-Dia-R1 | cdRNA05-postDia | 6.75992 | 44.4796 | 2.71807  | 0.0001   | 0.0432976 |
| RNA-Seq | Trinity | XLOC_061590 | c64951_g1_i1:3-419  | cdRNA04-Dia-R3 | cdRNA05-postDia | 16.8037 | 127.631 | 2.92512  | 5.00E-05 | 0.0249845 |
| RNA-Seq | Trinity | XLOC_061590 | c64951_g1_i1:3-419  | cdRNA03-Dia-R2 | cdRNA05-postDia | 16.0005 | 127.631 | 2.99579  | 5.00E-05 | 0.0249845 |
| RNA-Seq | Trinity | XLOC_061590 | c64951_g1_i1:3-419  | cdRNA02-Dia-R1 | cdRNA05-postDia | 10.5264 | 127.631 | 3.5999   | 5.00E-05 | 0.0249845 |
| RNA-Seq | Trinity | XLOC_061590 | c64951_g1_i1:3-419  | cdRNA01-preDia | cdRNA05-postDia | 2.98174 | 127.631 | 5.41968  | 5.00E-05 | 0.0249845 |
| RNA-Seq | Trinity | XLOC_061719 | c65076_g1_i1:1-1480 | cdRNA02-Dia-R1 | cdRNA05-postDia | 8.9627  | 52.9216 | 2.56185  | 5.00E-05 | 0.0249845 |
| RNA-Seq | Trinity | XLOC_061719 | c65076_g1_i1:1-1480 | cdRNA04-Dia-R3 | cdRNA05-postDia | 8.14553 | 52.9216 | 2.69978  | 5.00E-05 | 0.0249845 |
| RNA-Seq | Trinity | XLOC_061719 | c65076_g1_i1:1-1480 | cdRNA03-Dia-R2 | cdRNA05-postDia | 7.5804  | 52.9216 | 2.80351  | 5.00E-05 | 0.0249845 |
| RNA-Seq | Trinity | XLOC_061728 | c65085_g1_i1:0-609  | cdRNA01-preDia | cdRNA03-Dia-R2  | 27.7079 | 134.708 | 2.28147  | 5.00E-05 | 0.0249845 |
| RNA-Seq | Trinity | XLOC_061766 | c65124_g1_i1:0-285  | cdRNA01-preDia | cdRNA05-postDia | 7.74666 | 151.676 | 4.29127  | 0.0001   | 0.0432976 |
| RNA-Seq | Trinity | XLOC_061809 | c65168_g1_i1:0-1103 | cdRNA01-preDia | cdRNA05-postDia | 10.9883 | 51.293  | 2.2228   | 0.0001   | 0.0432976 |
| RNA-Seq | Trinity | XLOC_061809 | c65168_g1_i1:0-1103 | cdRNA02-Dia-R1 | cdRNA05-postDia | 7.6797  | 51.293  | 2.73964  | 5.00E-05 | 0.0249845 |
| RNA-Seq | Trinity | XLOC_061826 | c65184_g1_i1:0-1112 | cdRNA04-Dia-R3 | cdRNA05-postDia | 7.01294 | 39.4162 | 2.4907   | 5.00E-05 | 0.0249845 |
| RNA-Seq | Trinity | XLOC_061826 | c65184_g1_i1:0-1112 | cdRNA01-preDia | cdRNA05-postDia | 6.74519 | 39.4162 | 2.54686  | 5.00E-05 | 0.0249845 |
| RNA-Seq | Trinity | XLOC_061826 | c65184_g1_i1:0-1112 | cdRNA02-Dia-R1 | cdRNA05-postDia | 4.35895 | 39.4162 | 3.17674  | 5.00E-05 | 0.0249845 |
| RNA-Seq | Trinity | XLOC_062052 | c65407_g1_i1:0-509  | cdRNA01-preDia | cdRNA05-postDia | 4.66379 | 43.1208 | 3.20881  | 5.00E-05 | 0.0249845 |
| RNA-Seq | Trinity | XLOC_062166 | c65516_g1_i1:0-1252 | cdRNA03-Dia-R2 | cdRNA05-postDia | 1.76785 | 10.0509 | 2.50725  | 0.0001   | 0.0432976 |



|         |         |             |                     |                |                 |         |         |          |          |           |
|---------|---------|-------------|---------------------|----------------|-----------------|---------|---------|----------|----------|-----------|
| RNA-Seq | Trinity | XLOC_062166 | c65516_g1_i1:0-1252 | cdRNA04-Dia-R3 | cdRNA05-postDia | 1.57454 | 10.0509 | 2.67432  | 5.00E-05 | 0.0249845 |
| RNA-Seq | Trinity | XLOC_062359 | c65707_g1_i1:0-491  | cdRNA01-preDia | cdRNA03-Dia-R2  | 7.57209 | 46.0452 | 2.60429  | 5.00E-05 | 0.0249845 |
| RNA-Seq | Trinity | XLOC_062359 | c65707_g1_i1:0-491  | cdRNA01-preDia | cdRNA04-Dia-R3  | 7.57209 | 47.9389 | 2.66243  | 5.00E-05 | 0.0249845 |
| RNA-Seq | Trinity | XLOC_062679 | c66014_g1_i1:5-232  | cdRNA03-Dia-R2 | cdRNA05-postDia | 60.3413 | 374.09  | 2.63217  | 5.00E-05 | 0.0249845 |
| RNA-Seq | Trinity | XLOC_062679 | c66014_g1_i1:5-232  | cdRNA04-Dia-R3 | cdRNA05-postDia | 51.8281 | 374.09  | 2.85158  | 5.00E-05 | 0.0249845 |
| RNA-Seq | Trinity | XLOC_062679 | c66014_g1_i1:5-232  | cdRNA01-preDia | cdRNA05-postDia | 26.5572 | 374.09  | 3.81621  | 5.00E-05 | 0.0249845 |
| RNA-Seq | Trinity | XLOC_062798 | c6612_g1_i1:0-806   | cdRNA02-Dia-R1 | cdRNA05-postDia | 5.93195 | 28.9974 | 2.28934  | 5.00E-05 | 0.0249845 |
| RNA-Seq | Trinity | XLOC_063066 | c66389_g1_i1:0-628  | cdRNA03-Dia-R2 | cdRNA05-postDia | 1.9538  | 19.8333 | 3.34356  | 5.00E-05 | 0.0249845 |
| RNA-Seq | Trinity | XLOC_063066 | c66389_g1_i1:0-628  | cdRNA04-Dia-R3 | cdRNA05-postDia | 1.51968 | 19.8333 | 3.70608  | 0.0001   | 0.0432976 |
| RNA-Seq | Trinity | XLOC_063472 | c66788_g1_i1:0-521  | cdRNA04-Dia-R3 | cdRNA05-postDia | 49.6197 | 9.30348 | -2.41507 | 5.00E-05 | 0.0249845 |
| RNA-Seq | Trinity | XLOC_063472 | c66788_g1_i1:0-521  | cdRNA03-Dia-R2 | cdRNA05-postDia | 46.2921 | 9.30348 | -2.31492 | 5.00E-05 | 0.0249845 |
| RNA-Seq | Trinity | XLOC_063472 | c66788_g1_i1:0-521  | cdRNA01-preDia | cdRNA03-Dia-R2  | 1.6204  | 46.2921 | 4.83635  | 5.00E-05 | 0.0249845 |
| RNA-Seq | Trinity | XLOC_063472 | c66788_g1_i1:0-521  | cdRNA01-preDia | cdRNA04-Dia-R3  | 1.6204  | 49.6197 | 4.9365   | 5.00E-05 | 0.0249845 |
| RNA-Seq | Trinity | XLOC_064067 | c67350_g1_i1:0-272  | cdRNA01-preDia | cdRNA05-postDia | 17.1925 | 107.199 | 2.64044  | 0.0001   | 0.0432976 |
| RNA-Seq | Trinity | XLOC_064113 | c67396_g1_i1:0-602  | cdRNA01-preDia | cdRNA05-postDia | 11.4171 | 61.9847 | 2.44072  | 5.00E-05 | 0.0249845 |
| RNA-Seq | Trinity | XLOC_064113 | c67396_g1_i1:0-602  | cdRNA03-Dia-R2 | cdRNA05-postDia | 5.05491 | 61.9847 | 3.61615  | 5.00E-05 | 0.0249845 |
| RNA-Seq | Trinity | XLOC_064113 | c67396_g1_i1:0-602  | cdRNA04-Dia-R3 | cdRNA05-postDia | 4.28547 | 61.9847 | 3.85439  | 5.00E-05 | 0.0249845 |
| RNA-Seq | Trinity | XLOC_064113 | c67396_g1_i1:0-602  | cdRNA02-Dia-R1 | cdRNA05-postDia | 4.03756 | 61.9847 | 3.94036  | 5.00E-05 | 0.0249845 |
| RNA-Seq | Trinity | XLOC_064147 | c6742_g1_i1:4-437   | cdRNA01-preDia | cdRNA05-postDia | 20.3598 | 212.841 | 3.38598  | 5.00E-05 | 0.0249845 |
| RNA-Seq | Trinity | XLOC_064147 | c6742_g1_i1:4-437   | cdRNA03-Dia-R2 | cdRNA05-postDia | 16.5367 | 212.841 | 3.68603  | 5.00E-05 | 0.0249845 |
| RNA-Seq | Trinity | XLOC_064147 | c6742_g1_i1:4-437   | cdRNA04-Dia-R3 | cdRNA05-postDia | 16.2198 | 212.841 | 3.71394  | 5.00E-05 | 0.0249845 |
| RNA-Seq | Trinity | XLOC_064147 | c6742_g1_i1:4-437   | cdRNA02-Dia-R1 | cdRNA05-postDia | 12.2148 | 212.841 | 4.12307  | 5.00E-05 | 0.0249845 |
| RNA-Seq | Trinity | XLOC_064297 | c67572_g1_i1:0-732  | cdRNA03-Dia-R2 | cdRNA05-postDia | 3.13795 | 18.2668 | 2.54133  | 5.00E-05 | 0.0249845 |
| RNA-Seq | Trinity | XLOC_064922 | c6816_g1_i1:0-964   | cdRNA01-preDia | cdRNA04-Dia-R3  | 18.353  | 3.44121 | -2.41503 | 5.00E-05 | 0.0249845 |
| RNA-Seq | Trinity | XLOC_065184 | c68414_g1_i1:9-234  | cdRNA03-Dia-R2 | cdRNA05-postDia | 21.6525 | 201.635 | 3.21914  | 5.00E-05 | 0.0249845 |
| RNA-Seq | Trinity | XLOC_065371 | c68606_g1_i1:0-459  | cdRNA04-Dia-R3 | cdRNA05-postDia | 108.355 | 13.9097 | -2.9616  | 5.00E-05 | 0.0249845 |
| RNA-Seq | Trinity | XLOC_065371 | c68606_g1_i1:0-459  | cdRNA03-Dia-R2 | cdRNA05-postDia | 106.895 | 13.9097 | -2.94203 | 5.00E-05 | 0.0249845 |
| RNA-Seq | Trinity | XLOC_066169 | c69395_g1_i1:0-483  | cdRNA04-Dia-R3 | cdRNA05-postDia | 9.64533 | 55.8526 | 2.53372  | 5.00E-05 | 0.0249845 |
| RNA-Seq | Trinity | XLOC_066169 | c69395_g1_i1:0-483  | cdRNA02-Dia-R1 | cdRNA05-postDia | 7.5728  | 55.8526 | 2.88273  | 5.00E-05 | 0.0249845 |
| RNA-Seq | Trinity | XLOC_066655 | c69865_g1_i1:1-451  | cdRNA01-preDia | cdRNA04-Dia-R3  | 13.6526 | 91.6732 | 2.74732  | 5.00E-05 | 0.0249845 |
| RNA-Seq | Trinity | XLOC_066655 | c69865_g1_i1:1-451  | cdRNA01-preDia | cdRNA03-Dia-R2  | 13.6526 | 92.2042 | 2.75566  | 5.00E-05 | 0.0249845 |
| RNA-Seq | Trinity | XLOC_066945 | c70142_g1_i1:1-228  | cdRNA03-Dia-R2 | cdRNA05-postDia | 31.9992 | 206.904 | 2.69285  | 5.00E-05 | 0.0249845 |
| RNA-Seq | Trinity | XLOC_067125 | c7031_g1_i1:0-1102  | cdRNA01-preDia | cdRNA05-postDia | 1.80408 | 11.9388 | 2.72632  | 0.0001   | 0.0432976 |
| RNA-Seq | Trinity | XLOC_067820 | c70998_g1_i1:0-214  | cdRNA02-Dia-R1 | cdRNA05-postDia | 50.4224 | 337.646 | 2.74338  | 5.00E-05 | 0.0249845 |
| RNA-Seq | Trinity | XLOC_067820 | c70998_g1_i1:0-214  | cdRNA04-Dia-R3 | cdRNA05-postDia | 35.3221 | 337.646 | 3.25687  | 5.00E-05 | 0.0249845 |
| RNA-Seq | Trinity | XLOC_067820 | c70998_g1_i1:0-214  | cdRNA03-Dia-R2 | cdRNA05-postDia | 28.9644 | 337.646 | 3.54316  | 5.00E-05 | 0.0249845 |
| RNA-Seq | Trinity | XLOC_068132 | c71307_g1_i1:0-236  | cdRNA01-preDia | cdRNA05-postDia | 36.2991 | 224.558 | 2.62908  | 5.00E-05 | 0.0249845 |
| RNA-Seq | Trinity | XLOC_068132 | c71307_g1_i1:0-236  | cdRNA04-Dia-R3 | cdRNA05-postDia | 34.8197 | 224.558 | 2.68912  | 0.0001   | 0.0432976 |
| RNA-Seq | Trinity | XLOC_068132 | c71307_g1_i1:0-236  | cdRNA02-Dia-R1 | cdRNA05-postDia | 34.0204 | 224.558 | 2.72262  | 5.00E-05 | 0.0249845 |
| RNA-Seq | Trinity | XLOC_068520 | c71699_g1_i1:0-458  | cdRNA01-preDia | cdRNA03-Dia-R2  | 78.4024 | 9.93951 | -2.97965 | 5.00E-05 | 0.0249845 |
| RNA-Seq | Trinity | XLOC_068520 | c71699_g1_i1:0-458  | cdRNA01-preDia | cdRNA04-Dia-R3  | 78.4024 | 11.6392 | -2.75191 | 5.00E-05 | 0.0249845 |
| RNA-Seq | Trinity | XLOC_068520 | c71699_g1_i1:0-458  | cdRNA04-Dia-R3 | cdRNA05-postDia | 11.6392 | 72.3329 | 2.63566  | 5.00E-05 | 0.0249845 |
| RNA-Seq | Trinity | XLOC_068610 | c71790_g1_i1:0-449  | cdRNA03-Dia-R2 | cdRNA05-postDia | 4.83029 | 64.0912 | 3.72994  | 5.00E-05 | 0.0249845 |
| RNA-Seq | Trinity | XLOC_068610 | c71790_g1_i1:0-449  | cdRNA04-Dia-R3 | cdRNA05-postDia | 3.71283 | 64.0912 | 4.10953  | 5.00E-05 | 0.0249845 |
| RNA-Seq | Trinity | XLOC_068610 | c71790_g1_i1:0-449  | cdRNA02-Dia-R1 | cdRNA05-postDia | 2.18628 | 64.0912 | 4.87358  | 5.00E-05 | 0.0249845 |
| RNA-Seq | Trinity | XLOC_068835 | c72018_g1_i1:0-215  | cdRNA02-Dia-R1 | cdRNA05-postDia | 31.4325 | 726.72  | 4.53107  | 5.00E-05 | 0.0249845 |
| RNA-Seq | Trinity | XLOC_068907 | c7208_g1_i1:0-1536  | cdRNA02-Dia-R1 | cdRNA05-postDia | 25.9609 | 170.941 | 2.71909  | 5.00E-05 | 0.0249845 |

|         |         |             |                      |                |                 |         |         |          |          |           |
|---------|---------|-------------|----------------------|----------------|-----------------|---------|---------|----------|----------|-----------|
| RNA-Seq | Trinity | XLOC_069209 | c7238_g1_i1:0-694    | cdRNA01-preDia | cdRNA05-postDia | 6.28987 | 43.3521 | 2.785    | 5.00E-05 | 0.0249845 |
| RNA-Seq | Trinity | XLOC_069354 | c7253_g1_i1:0-442    | cdRNA04-Dia-R3 | cdRNA05-postDia | 7.64406 | 41.1932 | 2.43     | 5.00E-05 | 0.0249845 |
| RNA-Seq | Trinity | XLOC_069610 | c72809_g1_i1:0-204   | cdRNA02-Dia-R1 | cdRNA05-postDia | 68.358  | 1430.3  | 4.38707  | 5.00E-05 | 0.0249845 |
| RNA-Seq | Trinity | XLOC_069610 | c72809_g1_i1:0-204   | cdRNA04-Dia-R3 | cdRNA05-postDia | 20.1893 | 1430.3  | 6.14659  | 5.00E-05 | 0.0249845 |
| RNA-Seq | Trinity | XLOC_069661 | c7285_g1_i1:0-2317   | cdRNA01-preDia | cdRNA05-postDia | 10.0608 | 68.0731 | 2.75833  | 5.00E-05 | 0.0249845 |
| RNA-Seq | Trinity | XLOC_069661 | c7285_g1_i1:0-2317   | cdRNA02-Dia-R1 | cdRNA05-postDia | 5.14059 | 68.0731 | 3.72708  | 5.00E-05 | 0.0249845 |
| RNA-Seq | Trinity | XLOC_069661 | c7285_g1_i1:0-2317   | cdRNA03-Dia-R2 | cdRNA05-postDia | 2.87514 | 68.0731 | 4.56538  | 5.00E-05 | 0.0249845 |
| RNA-Seq | Trinity | XLOC_069661 | c7285_g1_i1:0-2317   | cdRNA04-Dia-R3 | cdRNA05-postDia | 2.45755 | 68.0731 | 4.7918   | 5.00E-05 | 0.0249845 |
| RNA-Seq | Trinity | XLOC_069671 | c7286_g1_i1:0-921    | cdRNA01-preDia | cdRNA05-postDia | 430.02  | 5.33624 | -6.33244 | 5.00E-05 | 0.0249845 |
| RNA-Seq | Trinity | XLOC_069671 | c7286_g1_i1:0-921    | cdRNA02-Dia-R1 | cdRNA05-postDia | 91.559  | 5.33624 | -4.10081 | 5.00E-05 | 0.0249845 |
| RNA-Seq | Trinity | XLOC_069671 | c7286_g1_i1:0-921    | cdRNA03-Dia-R2 | cdRNA05-postDia | 82.3086 | 5.33624 | -3.94715 | 5.00E-05 | 0.0249845 |
| RNA-Seq | Trinity | XLOC_069671 | c7286_g1_i1:0-921    | cdRNA04-Dia-R3 | cdRNA05-postDia | 77.5508 | 5.33624 | -3.86125 | 5.00E-05 | 0.0249845 |
| RNA-Seq | Trinity | XLOC_069872 | c73082_g1_i1:0-202   | cdRNA02-Dia-R1 | cdRNA05-postDia | 30.7584 | 308.954 | 3.32834  | 5.00E-05 | 0.0249845 |
| RNA-Seq | Trinity | XLOC_069978 | c7319_g1_i1:5-1581   | cdRNA01-preDia | cdRNA04-Dia-R3  | 15.5521 | 2.90078 | -2.4226  | 5.00E-05 | 0.0249845 |
| RNA-Seq | Trinity | XLOC_069978 | c7319_g1_i1:5-1581   | cdRNA01-preDia | cdRNA03-Dia-R2  | 15.5521 | 3.01906 | -2.36494 | 5.00E-05 | 0.0249845 |
| RNA-Seq | Trinity | XLOC_070223 | c7345_g1_i1:0-1423   | cdRNA03-Dia-R2 | cdRNA05-postDia | 13.9479 | 75.2314 | 2.43128  | 5.00E-05 | 0.0249845 |
| RNA-Seq | Trinity | XLOC_070223 | c7345_g1_i1:0-1423   | cdRNA04-Dia-R3 | cdRNA05-postDia | 13.5258 | 75.2314 | 2.47562  | 5.00E-05 | 0.0249845 |
| RNA-Seq | Trinity | XLOC_070223 | c7345_g1_i1:0-1423   | cdRNA01-preDia | cdRNA05-postDia | 9.04379 | 75.2314 | 3.05634  | 5.00E-05 | 0.0249845 |
| RNA-Seq | Trinity | XLOC_070501 | c7376_g1_i1:0-584    | cdRNA01-preDia | cdRNA05-postDia | 1.76769 | 26.22   | 3.89073  | 0.0001   | 0.0432976 |
| RNA-Seq | Trinity | XLOC_070552 | c7382_g1_i1:0-392    | cdRNA02-Dia-R1 | cdRNA05-postDia | 116.105 | 521.359 | 2.16684  | 0.0001   | 0.0432976 |
| RNA-Seq | Trinity | XLOC_070836 | c74125_g1_i1:0-1772  | cdRNA01-preDia | cdRNA02-Dia-R1  | 27.9975 | 242.418 | 3.11413  | 5.00E-05 | 0.0249845 |
| RNA-Seq | Trinity | XLOC_070836 | c74125_g1_i1:0-1772  | cdRNA01-preDia | cdRNA05-postDia | 27.9975 | 627.494 | 4.48623  | 5.00E-05 | 0.0249845 |
| RNA-Seq | Trinity | XLOC_070839 | c74128_g1_i1:0-958   | cdRNA01-preDia | cdRNA05-postDia | 3.9304  | 20.139  | 2.35724  | 5.00E-05 | 0.0249845 |
| RNA-Seq | Trinity | XLOC_070839 | c74128_g1_i1:0-958   | cdRNA04-Dia-R3 | cdRNA05-postDia | 3.66967 | 20.139  | 2.45627  | 5.00E-05 | 0.0249845 |
| RNA-Seq | Trinity | XLOC_070839 | c74128_g1_i1:0-958   | cdRNA02-Dia-R1 | cdRNA05-postDia | 3.11796 | 20.139  | 2.69131  | 5.00E-05 | 0.0249845 |
| RNA-Seq | Trinity | XLOC_070923 | c74206_g1_i1:0-2094  | cdRNA01-preDia | cdRNA03-Dia-R2  | 3.55417 | 17.5538 | 2.3042   | 5.00E-05 | 0.0249845 |
| RNA-Seq | Trinity | XLOC_070923 | c74206_g1_i1:0-2094  | cdRNA01-preDia | cdRNA04-Dia-R3  | 3.55417 | 18.7512 | 2.3994   | 5.00E-05 | 0.0249845 |
| RNA-Seq | Trinity | XLOC_071009 | c74283_g1_i1:0-1131  | cdRNA03-Dia-R2 | cdRNA05-postDia | 11.7453 | 57.3106 | 2.28672  | 0.0001   | 0.0432976 |
| RNA-Seq | Trinity | XLOC_071009 | c74283_g1_i1:0-1131  | cdRNA02-Dia-R1 | cdRNA05-postDia | 8.02558 | 57.3106 | 2.83613  | 5.00E-05 | 0.0249845 |
| RNA-Seq | Trinity | XLOC_071211 | c74472_g1_i1:0-762   | cdRNA04-Dia-R3 | cdRNA05-postDia | 2.3095  | 13.3564 | 2.53188  | 0.0001   | 0.0432976 |
| RNA-Seq | Trinity | XLOC_071246 | c74503_g1_i1:0-608   | cdRNA01-preDia | cdRNA03-Dia-R2  | 14.8663 | 97.4487 | 2.7126   | 0.0001   | 0.0432976 |
| RNA-Seq | Trinity | XLOC_071246 | c74503_g1_i1:0-608   | cdRNA01-preDia | cdRNA04-Dia-R3  | 14.8663 | 106.39  | 2.83925  | 5.00E-05 | 0.0249845 |
| RNA-Seq | Trinity | XLOC_071590 | c74821_g1_i1:0-480   | cdRNA04-Dia-R3 | cdRNA05-postDia | 78.0013 | 12.9958 | -2.58545 | 5.00E-05 | 0.0249845 |
| RNA-Seq | Trinity | XLOC_071590 | c74821_g1_i1:0-480   | cdRNA03-Dia-R2 | cdRNA05-postDia | 69.605  | 12.9958 | -2.42114 | 5.00E-05 | 0.0249845 |
| RNA-Seq | Trinity | XLOC_071595 | c74826_g1_i1:0-591   | cdRNA03-Dia-R2 | cdRNA05-postDia | 15.4938 | 95.8771 | 2.62949  | 5.00E-05 | 0.0249845 |
| RNA-Seq | Trinity | XLOC_071640 | c74867_g1_i1:0-1355  | cdRNA01-preDia | cdRNA05-postDia | 5.08085 | 24.3425 | 2.26034  | 5.00E-05 | 0.0249845 |
| RNA-Seq | Trinity | XLOC_071640 | c74867_g1_i1:0-1355  | cdRNA02-Dia-R1 | cdRNA05-postDia | 3.7231  | 24.3425 | 2.7089   | 5.00E-05 | 0.0249845 |
| RNA-Seq | Trinity | XLOC_071640 | c74867_g1_i1:0-1355  | cdRNA03-Dia-R2 | cdRNA05-postDia | 3.66728 | 24.3425 | 2.7307   | 5.00E-05 | 0.0249845 |
| RNA-Seq | Trinity | XLOC_071640 | c74867_g1_i1:0-1355  | cdRNA04-Dia-R3 | cdRNA05-postDia | 3.16136 | 24.3425 | 2.94486  | 5.00E-05 | 0.0249845 |
| RNA-Seq | Trinity | XLOC_071659 | c74884_g1_i1:0-4504  | cdRNA04-Dia-R3 | cdRNA05-postDia | 4.98037 | 29.3078 | 2.55696  | 0.0001   | 0.0432976 |
| RNA-Seq | Trinity | XLOC_071877 | c75081_g1_i1:3-953   | cdRNA01-preDia | cdRNA05-postDia | 369.447 | 40.977  | -3.17248 | 5.00E-05 | 0.0249845 |
| RNA-Seq | Trinity | XLOC_071923 | c75122_g1_i1:21-1058 | cdRNA03-Dia-R2 | cdRNA05-postDia | 28.7934 | 5.88497 | -2.29063 | 5.00E-05 | 0.0249845 |
| RNA-Seq | Trinity | XLOC_071923 | c75122_g1_i1:21-1058 | cdRNA01-preDia | cdRNA03-Dia-R2  | 3.22561 | 28.7934 | 3.15809  | 5.00E-05 | 0.0249845 |
| RNA-Seq | Trinity | XLOC_071923 | c75122_g1_i1:21-1058 | cdRNA01-preDia | cdRNA04-Dia-R3  | 3.22561 | 30.5774 | 3.24482  | 5.00E-05 | 0.0249845 |
| RNA-Seq | Trinity | XLOC_071977 | c75171_g1_i1:0-681   | cdRNA01-preDia | cdRNA05-postDia | 9.52626 | 68.179  | 2.83935  | 5.00E-05 | 0.0249845 |
| RNA-Seq | Trinity | XLOC_071977 | c75171_g1_i1:0-681   | cdRNA03-Dia-R2 | cdRNA05-postDia | 8.4355  | 68.179  | 3.01478  | 5.00E-05 | 0.0249845 |
| RNA-Seq | Trinity | XLOC_071977 | c75171_g1_i1:0-681   | cdRNA04-Dia-R3 | cdRNA05-postDia | 7.23093 | 68.179  | 3.23707  | 5.00E-05 | 0.0249845 |

|         |         |             |                     |                |                 |         |         |          |          |           |
|---------|---------|-------------|---------------------|----------------|-----------------|---------|---------|----------|----------|-----------|
| RNA-Seq | Trinity | XLOC_071977 | c75171_g1_i1:0-681  | cdRNA02-Dia-R1 | cdRNA05-postDia | 4.80378 | 68.179  | 3.82709  | 5.00E-05 | 0.0249845 |
| RNA-Seq | Trinity | XLOC_071985 | c7517_g1_i1:0-3344  | cdRNA04-Dia-R3 | cdRNA05-postDia | 6.77196 | 35.7304 | 2.39951  | 5.00E-05 | 0.0249845 |
| RNA-Seq | Trinity | XLOC_071985 | c7517_g1_i1:0-3344  | cdRNA02-Dia-R1 | cdRNA05-postDia | 6.43518 | 35.7304 | 2.4731   | 5.00E-05 | 0.0249845 |
| RNA-Seq | Trinity | XLOC_072144 | c75328_g1_i1:0-3740 | cdRNA03-Dia-R2 | cdRNA05-postDia | 29.018  | 5.71459 | -2.34423 | 5.00E-05 | 0.0249845 |
| RNA-Seq | Trinity | XLOC_072144 | c75328_g1_i1:0-3740 | cdRNA04-Dia-R3 | cdRNA05-postDia | 28.5993 | 5.71459 | -2.32326 | 0.0001   | 0.0432976 |
| RNA-Seq | Trinity | XLOC_072219 | c75396_g1_i1:0-1006 | cdRNA02-Dia-R1 | cdRNA04-Dia-R3  | 15.5473 | 2.12674 | -2.86995 | 5.00E-05 | 0.0249845 |
| RNA-Seq | Trinity | XLOC_072219 | c75396_g1_i1:0-1006 | cdRNA02-Dia-R1 | cdRNA05-postDia | 15.5473 | 88.9037 | 2.51558  | 5.00E-05 | 0.0249845 |
| RNA-Seq | Trinity | XLOC_072219 | c75396_g1_i1:0-1006 | cdRNA03-Dia-R2 | cdRNA05-postDia | 3.2956  | 88.9037 | 4.75363  | 5.00E-05 | 0.0249845 |
| RNA-Seq | Trinity | XLOC_072219 | c75396_g1_i1:0-1006 | cdRNA01-preDia | cdRNA05-postDia | 3.20248 | 88.9037 | 4.79498  | 5.00E-05 | 0.0249845 |
| RNA-Seq | Trinity | XLOC_072219 | c75396_g1_i1:0-1006 | cdRNA04-Dia-R3 | cdRNA05-postDia | 2.12674 | 88.9037 | 5.38553  | 5.00E-05 | 0.0249845 |
| RNA-Seq | Trinity | XLOC_072399 | c75556_g1_i1:0-1513 | cdRNA01-preDia | cdRNA03-Dia-R2  | 15.546  | 89.1747 | 2.52009  | 0.0001   | 0.0432976 |
| RNA-Seq | Trinity | XLOC_072399 | c75556_g1_i1:0-1513 | cdRNA01-preDia | cdRNA04-Dia-R3  | 15.546  | 90.3429 | 2.53887  | 5.00E-05 | 0.0249845 |
| RNA-Seq | Trinity | XLOC_072399 | c75556_g1_i1:0-1513 | cdRNA01-preDia | cdRNA05-postDia | 15.546  | 121.758 | 2.96941  | 5.00E-05 | 0.0249845 |
| RNA-Seq | Trinity | XLOC_072793 | c75920_g1_i1:4-480  | cdRNA01-preDia | cdRNA05-postDia | 73.2142 | 3.95608 | -4.20998 | 5.00E-05 | 0.0249845 |
| RNA-Seq | Trinity | XLOC_072793 | c75920_g1_i1:4-480  | cdRNA01-preDia | cdRNA04-Dia-R3  | 73.2142 | 7.80336 | -3.22996 | 5.00E-05 | 0.0249845 |
| RNA-Seq | Trinity | XLOC_072793 | c75920_g1_i1:4-480  | cdRNA01-preDia | cdRNA03-Dia-R2  | 73.2142 | 8.41161 | -3.12167 | 5.00E-05 | 0.0249845 |
| RNA-Seq | Trinity | XLOC_072959 | c76081_g1_i1:0-520  | cdRNA03-Dia-R2 | cdRNA05-postDia | 8.61361 | 50.8266 | 2.56089  | 5.00E-05 | 0.0249845 |
| RNA-Seq | Trinity | XLOC_073043 | c7615_g1_i1:0-836   | cdRNA01-preDia | cdRNA04-Dia-R3  | 26.0714 | 4.2581  | -2.61419 | 5.00E-05 | 0.0249845 |
| RNA-Seq | Trinity | XLOC_073107 | c76220_g1_i1:0-1498 | cdRNA02-Dia-R1 | cdRNA05-postDia | 2.59874 | 15.6773 | 2.59279  | 5.00E-05 | 0.0249845 |
| RNA-Seq | Trinity | XLOC_073412 | c7649_g1_i2:4-557   | cdRNA01-preDia | cdRNA03-Dia-R2  | 80.2711 | 14.468  | -2.47201 | 5.00E-05 | 0.0249845 |
| RNA-Seq | Trinity | XLOC_073469 | c76550_g1_i1:0-2529 | cdRNA01-preDia | cdRNA05-postDia | 42.9811 | 5.03979 | -3.09227 | 5.00E-05 | 0.0249845 |
| RNA-Seq | Trinity | XLOC_073545 | c7661_g1_i1:0-2159  | cdRNA04-Dia-R3 | cdRNA05-postDia | 9.96544 | 1.85517 | -2.42539 | 0.0001   | 0.0432976 |
| RNA-Seq | Trinity | XLOC_073675 | c76738_g1_i1:0-1102 | cdRNA04-Dia-R3 | cdRNA05-postDia | 2.02601 | 15.5781 | 2.94281  | 5.00E-05 | 0.0249845 |
| RNA-Seq | Trinity | XLOC_073675 | c76738_g1_i1:0-1102 | cdRNA03-Dia-R2 | cdRNA05-postDia | 1.88898 | 15.5781 | 3.04385  | 5.00E-05 | 0.0249845 |
| RNA-Seq | Trinity | XLOC_073711 | c76772_g1_i1:0-1428 | cdRNA01-preDia | cdRNA02-Dia-R1  | 0.7425  | 8.21775 | 3.46828  | 5.00E-05 | 0.0249845 |
| RNA-Seq | Trinity | XLOC_073711 | c76772_g1_i1:0-1428 | cdRNA01-preDia | cdRNA04-Dia-R3  | 0.7425  | 10.0642 | 3.7607   | 5.00E-05 | 0.0249845 |
| RNA-Seq | Trinity | XLOC_073711 | c76772_g1_i1:0-1428 | cdRNA01-preDia | cdRNA03-Dia-R2  | 0.7425  | 11.1837 | 3.91286  | 5.00E-05 | 0.0249845 |
| RNA-Seq | Trinity | XLOC_073804 | c76860_g1_i1:0-609  | cdRNA01-preDia | cdRNA05-postDia | 9.95144 | 49.9903 | 2.32867  | 5.00E-05 | 0.0249845 |
| RNA-Seq | Trinity | XLOC_073804 | c76860_g1_i1:0-609  | cdRNA03-Dia-R2 | cdRNA05-postDia | 7.69483 | 49.9903 | 2.69969  | 5.00E-05 | 0.0249845 |
| RNA-Seq | Trinity | XLOC_073804 | c76860_g1_i1:0-609  | cdRNA04-Dia-R3 | cdRNA05-postDia | 6.08314 | 49.9903 | 3.03876  | 5.00E-05 | 0.0249845 |
| RNA-Seq | Trinity | XLOC_073865 | c76915_g1_i1:0-331  | cdRNA03-Dia-R2 | cdRNA05-postDia | 10.742  | 66.0461 | 2.62021  | 5.00E-05 | 0.0249845 |
| RNA-Seq | Trinity | XLOC_073987 | c77028_g1_i1:0-905  | cdRNA03-Dia-R2 | cdRNA05-postDia | 2.58865 | 16.431  | 2.66615  | 5.00E-05 | 0.0249845 |
| RNA-Seq | Trinity | XLOC_074046 | c77084_g1_i1:1-917  | cdRNA04-Dia-R3 | cdRNA05-postDia | 7.6658  | 38.0078 | 2.30979  | 0.0001   | 0.0432976 |
| RNA-Seq | Trinity | XLOC_074046 | c77084_g1_i1:1-917  | cdRNA01-preDia | cdRNA05-postDia | 2.33086 | 38.0078 | 4.02736  | 5.00E-05 | 0.0249845 |
| RNA-Seq | Trinity | XLOC_074099 | c77133_g1_i1:0-993  | cdRNA01-preDia | cdRNA05-postDia | 47.2261 | 7.02137 | -2.74976 | 5.00E-05 | 0.0249845 |
| RNA-Seq | Trinity | XLOC_074178 | c77207_g1_i1:0-1402 | cdRNA03-Dia-R2 | cdRNA05-postDia | 270.776 | 23.2877 | -3.53946 | 5.00E-05 | 0.0249845 |
| RNA-Seq | Trinity | XLOC_074178 | c77207_g1_i1:0-1402 | cdRNA04-Dia-R3 | cdRNA05-postDia | 263.679 | 23.2877 | -3.50114 | 5.00E-05 | 0.0249845 |
| RNA-Seq | Trinity | XLOC_074236 | c77261_g1_i1:0-636  | cdRNA02-Dia-R1 | cdRNA05-postDia | 6.75074 | 49.7259 | 2.88088  | 5.00E-05 | 0.0249845 |
| RNA-Seq | Trinity | XLOC_074236 | c77261_g1_i1:0-636  | cdRNA01-preDia | cdRNA05-postDia | 2.56104 | 49.7259 | 4.2792   | 5.00E-05 | 0.0249845 |
| RNA-Seq | Trinity | XLOC_074312 | c77335_g1_i1:0-293  | cdRNA01-preDia | cdRNA04-Dia-R3  | 32.0672 | 181.324 | 2.4994   | 5.00E-05 | 0.0249845 |
| RNA-Seq | Trinity | XLOC_074312 | c77335_g1_i1:0-293  | cdRNA01-preDia | cdRNA03-Dia-R2  | 32.0672 | 218.626 | 2.76929  | 5.00E-05 | 0.0249845 |
| RNA-Seq | Trinity | XLOC_074379 | c77398_g1_i1:9-1189 | cdRNA01-preDia | cdRNA04-Dia-R3  | 16.8824 | 2.17478 | -2.95658 | 0.0001   | 0.0432976 |
| RNA-Seq | Trinity | XLOC_074379 | c77398_g1_i1:9-1189 | cdRNA01-preDia | cdRNA03-Dia-R2  | 16.8824 | 3.15268 | -2.42087 | 5.00E-05 | 0.0249845 |
| RNA-Seq | Trinity | XLOC_074600 | c77599_g1_i1:0-671  | cdRNA01-preDia | cdRNA05-postDia | 107.963 | 1.0241  | -6.72004 | 5.00E-05 | 0.0249845 |
| RNA-Seq | Trinity | XLOC_074600 | c77599_g1_i1:0-671  | cdRNA01-preDia | cdRNA02-Dia-R1  | 107.963 | 4.5243  | -4.5767  | 5.00E-05 | 0.0249845 |
| RNA-Seq | Trinity | XLOC_074600 | c77599_g1_i1:0-671  | cdRNA01-preDia | cdRNA03-Dia-R2  | 107.963 | 12.5863 | -3.10062 | 5.00E-05 | 0.0249845 |
| RNA-Seq | Trinity | XLOC_074600 | c77599_g1_i1:0-671  | cdRNA01-preDia | cdRNA04-Dia-R3  | 107.963 | 14.1222 | -2.9345  | 5.00E-05 | 0.0249845 |

|         |         |             |                     |                |                 |          |          |          |          |           |
|---------|---------|-------------|---------------------|----------------|-----------------|----------|----------|----------|----------|-----------|
| RNA-Seq | Trinity | XLOC_074643 | c77638_g1_i1:0-249  | cdRNA04-Dia-R3 | cdRNA05-postDia | 22.1921  | 146.187  | 2.71969  | 5.00E-05 | 0.0249845 |
| RNA-Seq | Trinity | XLOC_074643 | c77638_g1_i1:0-249  | cdRNA01-preDia | cdRNA05-postDia | 15.6502  | 146.187  | 3.22356  | 5.00E-05 | 0.0249845 |
| RNA-Seq | Trinity | XLOC_074663 | c77657_g1_i1:0-1239 | cdRNA04-Dia-R3 | cdRNA05-postDia | 12.4513  | 73.8959  | 2.56919  | 5.00E-05 | 0.0249845 |
| RNA-Seq | Trinity | XLOC_074663 | c77657_g1_i1:0-1239 | cdRNA03-Dia-R2 | cdRNA05-postDia | 11.7394  | 73.8959  | 2.65414  | 5.00E-05 | 0.0249845 |
| RNA-Seq | Trinity | XLOC_074663 | c77657_g1_i1:0-1239 | cdRNA02-Dia-R1 | cdRNA05-postDia | 8.91329  | 73.8959  | 3.05146  | 5.00E-05 | 0.0249845 |
| RNA-Seq | Trinity | XLOC_075182 | c7813_g1_i1:0-428   | cdRNA02-Dia-R1 | cdRNA05-postDia | 18.1996  | 200.865  | 3.46425  | 5.00E-05 | 0.0249845 |
| RNA-Seq | Trinity | XLOC_075182 | c7813_g1_i1:0-428   | cdRNA04-Dia-R3 | cdRNA05-postDia | 18.1045  | 200.865  | 3.47181  | 5.00E-05 | 0.0249845 |
| RNA-Seq | Trinity | XLOC_075182 | c7813_g1_i1:0-428   | cdRNA03-Dia-R2 | cdRNA05-postDia | 15.849   | 200.865  | 3.66376  | 5.00E-05 | 0.0249845 |
| RNA-Seq | Trinity | XLOC_075182 | c7813_g1_i1:0-428   | cdRNA01-preDia | cdRNA05-postDia | 15.1695  | 200.865  | 3.72698  | 5.00E-05 | 0.0249845 |
| RNA-Seq | Trinity | XLOC_075256 | c78209_g1_i1:0-1200 | cdRNA03-Dia-R2 | cdRNA05-postDia | 2.29723  | 23.9291  | 3.3808   | 5.00E-05 | 0.0249845 |
| RNA-Seq | Trinity | XLOC_075256 | c78209_g1_i1:0-1200 | cdRNA04-Dia-R3 | cdRNA05-postDia | 2.28333  | 23.9291  | 3.38955  | 5.00E-05 | 0.0249845 |
| RNA-Seq | Trinity | XLOC_075256 | c78209_g1_i1:0-1200 | cdRNA02-Dia-R1 | cdRNA05-postDia | 2.00185  | 23.9291  | 3.57936  | 5.00E-05 | 0.0249845 |
| RNA-Seq | Trinity | XLOC_075519 | c78458_g1_i1:1-628  | cdRNA02-Dia-R1 | cdRNA05-postDia | 22.9343  | 409.38   | 4.15786  | 5.00E-05 | 0.0249845 |
| RNA-Seq | Trinity | XLOC_075519 | c78458_g1_i1:1-628  | cdRNA01-preDia | cdRNA05-postDia | 8.96752  | 409.38   | 5.51259  | 5.00E-05 | 0.0249845 |
| RNA-Seq | Trinity | XLOC_075519 | c78458_g1_i1:1-628  | cdRNA03-Dia-R2 | cdRNA05-postDia | 6.15504  | 409.38   | 6.05553  | 5.00E-05 | 0.0249845 |
| RNA-Seq | Trinity | XLOC_075519 | c78458_g1_i1:1-628  | cdRNA04-Dia-R3 | cdRNA05-postDia | 5.82429  | 409.38   | 6.13522  | 5.00E-05 | 0.0249845 |
| RNA-Seq | Trinity | XLOC_075624 | c78556_g1_i1:0-855  | cdRNA04-Dia-R2 | cdRNA05-postDia | 6.66567  | 35.3858  | 2.40835  | 5.00E-05 | 0.0249845 |
| RNA-Seq | Trinity | XLOC_075624 | c78556_g1_i1:0-855  | cdRNA04-Dia-R3 | cdRNA05-postDia | 5.70584  | 35.3858  | 2.63266  | 5.00E-05 | 0.0249845 |
| RNA-Seq | Trinity | XLOC_075624 | c78556_g1_i1:0-855  | cdRNA01-preDia | cdRNA05-postDia | 5.28061  | 35.3858  | 2.74439  | 5.00E-05 | 0.0249845 |
| RNA-Seq | Trinity | XLOC_075668 | c78597_g1_i1:0-761  | cdRNA01-preDia | cdRNA03-Dia-R2  | 14.8264  | 2.47881  | -2.58045 | 0.0001   | 0.0432976 |
| RNA-Seq | Trinity | XLOC_075668 | c78597_g1_i1:0-761  | cdRNA04-Dia-R3 | cdRNA05-postDia | 3.26632  | 32.3418  | 3.30766  | 5.00E-05 | 0.0249845 |
| RNA-Seq | Trinity | XLOC_075668 | c78597_g1_i1:0-761  | cdRNA03-Dia-R2 | cdRNA05-postDia | 2.47881  | 32.3418  | 3.70568  | 5.00E-05 | 0.0249845 |
| RNA-Seq | Trinity | XLOC_075716 | c78642_g1_i1:0-1684 | cdRNA01-preDia | cdRNA04-Dia-R3  | 21.8128  | 2.27933  | -3.25849 | 5.00E-05 | 0.0249845 |
| RNA-Seq | Trinity | XLOC_075716 | c78642_g1_i1:0-1684 | cdRNA01-preDia | cdRNA03-Dia-R2  | 21.8128  | 2.4789   | -3.1374  | 5.00E-05 | 0.0249845 |
| RNA-Seq | Trinity | XLOC_075945 | c7885_g2_i1:0-1819  | cdRNA03-Dia-R2 | cdRNA05-postDia | 1.90528  | 10.1181  | 2.40886  | 5.00E-05 | 0.0249845 |
| RNA-Seq | Trinity | XLOC_075997 | c78906_g1_i1:17-728 | cdRNA01-preDia | cdRNA05-postDia | 35.6945  | 1.10052  | -5.01944 | 5.00E-05 | 0.0249845 |
| RNA-Seq | Trinity | XLOC_075997 | c78906_g1_i1:17-728 | cdRNA01-preDia | cdRNA03-Dia-R2  | 35.6945  | 1.16711  | -4.93468 | 5.00E-05 | 0.0249845 |
| RNA-Seq | Trinity | XLOC_075997 | c78906_g1_i1:17-728 | cdRNA01-preDia | cdRNA04-Dia-R3  | 35.6945  | 1.49518  | -4.57731 | 5.00E-05 | 0.0249845 |
| RNA-Seq | Trinity | XLOC_076095 | c7899_g1_i2:3-838   | cdRNA01-preDia | cdRNA05-postDia | 14.5279  | 120.828  | 3.05605  | 5.00E-05 | 0.0249845 |
| RNA-Seq | Trinity | XLOC_076117 | c79019_g1_i1:13-573 | cdRNA04-Dia-R3 | cdRNA05-postDia | 1.70348  | 21.2706  | 3.6423   | 0.0001   | 0.0432976 |
| RNA-Seq | Trinity | XLOC_076142 | c79039_g1_i1:0-762  | cdRNA01-preDia | cdRNA05-postDia | 59.4825  | 1.99988  | -4.89448 | 5.00E-05 | 0.0249845 |
| RNA-Seq | Trinity | XLOC_076142 | c79039_g1_i1:0-762  | cdRNA01-preDia | cdRNA02-Dia-R1  | 59.4825  | 3.30651  | -4.16909 | 5.00E-05 | 0.0249845 |
| RNA-Seq | Trinity | XLOC_076142 | c79039_g1_i1:0-762  | cdRNA01-preDia | cdRNA04-Dia-R3  | 59.4825  | 5.50204  | -3.43443 | 5.00E-05 | 0.0249845 |
| RNA-Seq | Trinity | XLOC_076142 | c79039_g1_i1:0-762  | cdRNA01-preDia | cdRNA03-Dia-R2  | 59.4825  | 5.6557   | -3.39469 | 5.00E-05 | 0.0249845 |
| RNA-Seq | Trinity | XLOC_076250 | c79145_g1_i1:2-229  | cdRNA02-Dia-R1 | cdRNA05-postDia | 20.6906  | 205.98   | 3.31546  | 5.00E-05 | 0.0249845 |
| RNA-Seq | Trinity | XLOC_076325 | c79215_g1_i1:0-588  | cdRNA04-Dia-R3 | cdRNA05-postDia | 171.549  | 1405.91  | 3.03481  | 5.00E-05 | 0.0249845 |
| RNA-Seq | Trinity | XLOC_076325 | c79215_g1_i1:0-588  | cdRNA03-Dia-R2 | cdRNA05-postDia | 156.971  | 1405.91  | 3.16293  | 5.00E-05 | 0.0249845 |
| RNA-Seq | Trinity | XLOC_076411 | c79297_g1_i1:4-256  | cdRNA02-Dia-R1 | cdRNA05-postDia | 115.537  | 1411.14  | 3.61043  | 5.00E-05 | 0.0249845 |
| RNA-Seq | Trinity | XLOC_076411 | c79297_g1_i1:4-256  | cdRNA01-preDia | cdRNA05-postDia | 60.3151  | 1411.14  | 4.54819  | 5.00E-05 | 0.0249845 |
| RNA-Seq | Trinity | XLOC_076411 | c79297_g1_i1:4-256  | cdRNA03-Dia-R2 | cdRNA05-postDia | 49.0892  | 1411.14  | 4.84531  | 5.00E-05 | 0.0249845 |
| RNA-Seq | Trinity | XLOC_076411 | c79297_g1_i1:4-256  | cdRNA04-Dia-R3 | cdRNA05-postDia | 42.7637  | 1411.14  | 5.04433  | 5.00E-05 | 0.0249845 |
| RNA-Seq | Trinity | XLOC_076459 | c7933_g1_i2:0-1875  | cdRNA01-preDia | cdRNA04-Dia-R3  | 32.4672  | 5.62542  | -2.52895 | 5.00E-05 | 0.0249845 |
| RNA-Seq | Trinity | XLOC_076459 | c7933_g1_i2:0-1875  | cdRNA01-preDia | cdRNA03-Dia-R2  | 32.4672  | 5.90202  | -2.4597  | 5.00E-05 | 0.0249845 |
| RNA-Seq | Trinity | XLOC_076666 | c79536_g1_i1:0-1585 | cdRNA04-Dia-R3 | cdRNA05-postDia | 12.1862  | 0.865794 | -3.81508 | 5.00E-05 | 0.0249845 |
| RNA-Seq | Trinity | XLOC_076666 | c79536_g1_i1:0-1585 | cdRNA03-Dia-R2 | cdRNA05-postDia | 10.7407  | 0.865794 | -3.63292 | 5.00E-05 | 0.0249845 |
| RNA-Seq | Trinity | XLOC_076666 | c79536_g1_i1:0-1585 | cdRNA02-Dia-R1 | cdRNA03-Dia-R2  | 0.732662 | 10.7407  | 3.87379  | 5.00E-05 | 0.0249845 |
| RNA-Seq | Trinity | XLOC_076666 | c79536_g1_i1:0-1585 | cdRNA02-Dia-R1 | cdRNA04-Dia-R3  | 0.732662 | 12.1862  | 4.05596  | 5.00E-05 | 0.0249845 |

|         |         |             |                     |                |                 |          |         |          |          |           |
|---------|---------|-------------|---------------------|----------------|-----------------|----------|---------|----------|----------|-----------|
| RNA-Seq | Trinity | XLOC_076834 | c79699_g1_i1:0-617  | cdRNA04-Dia-R3 | cdRNA05-postDia | 5.04757  | 29.915  | 2.56721  | 5.00E-05 | 0.0249845 |
| RNA-Seq | Trinity | XLOC_076930 | c7978_g1_i1:0-1210  | cdRNA04-Dia-R3 | cdRNA05-postDia | 4.1445   | 26.306  | 2.66612  | 0.0001   | 0.0432976 |
| RNA-Seq | Trinity | XLOC_076950 | c79807_g1_i1:0-348  | cdRNA01-preDia | cdRNA05-postDia | 138.569  | 978.638 | 2.82017  | 5.00E-05 | 0.0249845 |
| RNA-Seq | Trinity | XLOC_077115 | c79970_g1_i1:0-928  | cdRNA04-Dia-R3 | cdRNA05-postDia | 3.66467  | 18.9366 | 2.36943  | 5.00E-05 | 0.0249845 |
| RNA-Seq | Trinity | XLOC_077159 | c8000_g1_i1:0-660   | cdRNA02-Dia-R1 | cdRNA05-postDia | 11.0289  | 60.2189 | 2.44893  | 5.00E-05 | 0.0249845 |
| RNA-Seq | Trinity | XLOC_077159 | c8000_g1_i1:0-660   | cdRNA03-Dia-R2 | cdRNA05-postDia | 10.7272  | 60.2189 | 2.48895  | 5.00E-05 | 0.0249845 |
| RNA-Seq | Trinity | XLOC_077223 | c8006_g1_i2:40-2498 | cdRNA03-Dia-R2 | cdRNA05-postDia | 19.1295  | 1.69748 | -3.49433 | 5.00E-05 | 0.0249845 |
| RNA-Seq | Trinity | XLOC_077223 | c8006_g1_i2:40-2498 | cdRNA04-Dia-R3 | cdRNA05-postDia | 18.6827  | 1.69748 | -3.46024 | 5.00E-05 | 0.0249845 |
| RNA-Seq | Trinity | XLOC_077223 | c8006_g1_i2:40-2498 | cdRNA02-Dia-R1 | cdRNA04-Dia-R3  | 3.27429  | 18.6827 | 2.51245  | 5.00E-05 | 0.0249845 |
| RNA-Seq | Trinity | XLOC_077223 | c8006_g1_i2:40-2498 | cdRNA02-Dia-R1 | cdRNA03-Dia-R2  | 3.27429  | 19.1295 | 2.54655  | 5.00E-05 | 0.0249845 |
| RNA-Seq | Trinity | XLOC_077223 | c8006_g1_i2:40-2498 | cdRNA01-preDia | cdRNA04-Dia-R3  | 0.315552 | 18.6827 | 5.88769  | 5.00E-05 | 0.0249845 |
| RNA-Seq | Trinity | XLOC_077223 | c8006_g1_i2:40-2498 | cdRNA01-preDia | cdRNA03-Dia-R2  | 0.315552 | 19.1295 | 5.92178  | 5.00E-05 | 0.0249845 |
| RNA-Seq | Trinity | XLOC_077523 | c8035_g1_i1:0-2055  | cdRNA03-Dia-R2 | cdRNA05-postDia | 33.6735  | 3.89727 | -3.11108 | 5.00E-05 | 0.0249845 |
| RNA-Seq | Trinity | XLOC_077523 | c8035_g1_i1:0-2055  | cdRNA04-Dia-R3 | cdRNA05-postDia | 32.9685  | 3.89727 | -3.08056 | 5.00E-05 | 0.0249845 |
| RNA-Seq | Trinity | XLOC_077523 | c8035_g1_i1:0-2055  | cdRNA01-preDia | cdRNA04-Dia-R3  | 4.5043   | 32.9685 | 2.87171  | 5.00E-05 | 0.0249845 |
| RNA-Seq | Trinity | XLOC_077523 | c8035_g1_i1:0-2055  | cdRNA01-preDia | cdRNA03-Dia-R2  | 4.5043   | 33.6735 | 2.90224  | 5.00E-05 | 0.0249845 |
| RNA-Seq | Trinity | XLOC_077687 | c80508_g1_i1:12-785 | cdRNA03-Dia-R2 | cdRNA05-postDia | 2.42654  | 19.8924 | 3.03525  | 5.00E-05 | 0.0249845 |
| RNA-Seq | Trinity | XLOC_077846 | c80663_g1_i1:0-536  | cdRNA03-Dia-R2 | cdRNA05-postDia | 4.63394  | 32.5316 | 2.81153  | 0.0001   | 0.0432976 |
| RNA-Seq | Trinity | XLOC_077909 | c80722_g1_i1:0-331  | cdRNA02-Dia-R1 | cdRNA05-postDia | 15.5122  | 97.3637 | 2.64998  | 5.00E-05 | 0.0249845 |
| RNA-Seq | Trinity | XLOC_077909 | c80722_g1_i1:0-331  | cdRNA01-preDia | cdRNA05-postDia | 13.5265  | 97.3637 | 2.8476   | 0.0001   | 0.0432976 |
| RNA-Seq | Trinity | XLOC_078030 | c8083_g1_i1:0-1386  | cdRNA03-Dia-R2 | cdRNA05-postDia | 12.7492  | 62.8851 | 2.30231  | 0.0001   | 0.0432976 |
| RNA-Seq | Trinity | XLOC_078030 | c8083_g1_i1:0-1386  | cdRNA04-Dia-R3 | cdRNA05-postDia | 12.4421  | 62.8851 | 2.33749  | 0.0001   | 0.0432976 |
| RNA-Seq | Trinity | XLOC_078030 | c8083_g1_i1:0-1386  | cdRNA01-preDia | cdRNA05-postDia | 11.7672  | 62.8851 | 2.41794  | 5.00E-05 | 0.0249845 |
| RNA-Seq | Trinity | XLOC_078223 | c81033_g1_i1:0-369  | cdRNA03-Dia-R2 | cdRNA05-postDia | 75.3764  | 10.1216 | -2.89668 | 5.00E-05 | 0.0249845 |
| RNA-Seq | Trinity | XLOC_078223 | c81033_g1_i1:0-369  | cdRNA04-Dia-R3 | cdRNA05-postDia | 67.8395  | 10.1216 | -2.74469 | 5.00E-05 | 0.0249845 |
| RNA-Seq | Trinity | XLOC_078365 | c81174_g1_i1:10-809 | cdRNA03-Dia-R2 | cdRNA05-postDia | 15.8457  | 1.94251 | -3.0281  | 5.00E-05 | 0.0249845 |
| RNA-Seq | Trinity | XLOC_078365 | c81174_g1_i1:10-809 | cdRNA04-Dia-R3 | cdRNA05-postDia | 15.3523  | 1.94251 | -2.98246 | 5.00E-05 | 0.0249845 |
| RNA-Seq | Trinity | XLOC_078450 | c81257_g1_i1:0-302  | cdRNA03-Dia-R2 | cdRNA05-postDia | 26.7785  | 149.779 | 2.48369  | 0.0001   | 0.0432976 |
| RNA-Seq | Trinity | XLOC_078450 | c81257_g1_i1:0-302  | cdRNA01-preDia | cdRNA05-postDia | 16.7155  | 149.779 | 3.16358  | 5.00E-05 | 0.0249845 |
| RNA-Seq | Trinity | XLOC_078484 | c8128_g1_i1:0-630   | cdRNA02-Dia-R1 | cdRNA05-postDia | 6.28698  | 40.603  | 2.69115  | 5.00E-05 | 0.0249845 |
| RNA-Seq | Trinity | XLOC_078484 | c8128_g1_i1:0-630   | cdRNA04-Dia-R3 | cdRNA05-postDia | 5.07149  | 40.603  | 3.00111  | 5.00E-05 | 0.0249845 |
| RNA-Seq | Trinity | XLOC_078484 | c8128_g1_i1:0-630   | cdRNA03-Dia-R2 | cdRNA05-postDia | 4.90788  | 40.603  | 3.04841  | 5.00E-05 | 0.0249845 |
| RNA-Seq | Trinity | XLOC_078484 | c8128_g1_i1:0-630   | cdRNA01-preDia | cdRNA05-postDia | 2.13334  | 40.603  | 4.2504   | 5.00E-05 | 0.0249845 |
| RNA-Seq | Trinity | XLOC_078597 | c81398_g1_i1:0-1066 | cdRNA01-preDia | cdRNA05-postDia | 3.85053  | 26.3081 | 2.77238  | 5.00E-05 | 0.0249845 |
| RNA-Seq | Trinity | XLOC_078652 | c8144_g1_i1:0-651   | cdRNA03-Dia-R2 | cdRNA05-postDia | 9.44288  | 52.1587 | 2.46561  | 5.00E-05 | 0.0249845 |
| RNA-Seq | Trinity | XLOC_078652 | c8144_g1_i1:0-651   | cdRNA04-Dia-R3 | cdRNA05-postDia | 9.41209  | 52.1587 | 2.47032  | 5.00E-05 | 0.0249845 |
| RNA-Seq | Trinity | XLOC_078652 | c8144_g1_i1:0-651   | cdRNA01-preDia | cdRNA05-postDia | 9.10483  | 52.1587 | 2.5182   | 5.00E-05 | 0.0249845 |
| RNA-Seq | Trinity | XLOC_078652 | c8144_g1_i1:0-651   | cdRNA02-Dia-R1 | cdRNA05-postDia | 7.65597  | 52.1587 | 2.76825  | 5.00E-05 | 0.0249845 |
| RNA-Seq | Trinity | XLOC_079060 | c81840_g1_i1:0-877  | cdRNA01-preDia | cdRNA05-postDia | 2.87692  | 22.8589 | 2.99016  | 5.00E-05 | 0.0249845 |
| RNA-Seq | Trinity | XLOC_079230 | c82005_g1_i1:0-1072 | cdRNA01-preDia | cdRNA05-postDia | 1.54777  | 14.3717 | 3.21497  | 5.00E-05 | 0.0249845 |
| RNA-Seq | Trinity | XLOC_079337 | c82111_g1_i1:0-245  | cdRNA01-preDia | cdRNA02-Dia-R1  | 17.1812  | 127.24  | 2.88864  | 5.00E-05 | 0.0249845 |
| RNA-Seq | Trinity | XLOC_079515 | c82286_g1_i1:0-621  | cdRNA04-Dia-R3 | cdRNA05-postDia | 19.0877  | 3.24953 | -2.55434 | 5.00E-05 | 0.0249845 |
| RNA-Seq | Trinity | XLOC_079939 | c82687_g1_i1:4-290  | cdRNA03-Dia-R2 | cdRNA05-postDia | 18.9203  | 96.9414 | 2.35718  | 0.0001   | 0.0432976 |
| RNA-Seq | Trinity | XLOC_080352 | c83081_g1_i1:0-702  | cdRNA01-preDia | cdRNA04-Dia-R3  | 3.72917  | 20.6258 | 2.46753  | 0.0001   | 0.0432976 |
| RNA-Seq | Trinity | XLOC_080417 | c83142_g1_i1:0-1225 | cdRNA01-preDia | cdRNA05-postDia | 26.0071  | 1.83467 | -3.82532 | 5.00E-05 | 0.0249845 |
| RNA-Seq | Trinity | XLOC_080417 | c83142_g1_i1:0-1225 | cdRNA02-Dia-R1 | cdRNA05-postDia | 22.4722  | 1.83467 | -3.61455 | 5.00E-05 | 0.0249845 |
| RNA-Seq | Trinity | XLOC_080417 | c83142_g1_i1:0-1225 | cdRNA03-Dia-R2 | cdRNA05-postDia | 18.4301  | 1.83467 | -3.32847 | 5.00E-05 | 0.0249845 |

|         |         |             |                      |                |                 |         |         |          |          |           |
|---------|---------|-------------|----------------------|----------------|-----------------|---------|---------|----------|----------|-----------|
| RNA-Seq | Trinity | XLOC_080417 | c83142_g1_i1:0-1225  | cdRNA04-Dia-R3 | cdRNA05-postDia | 16.7428 | 1.83467 | -3.18995 | 5.00E-05 | 0.0249845 |
| RNA-Seq | Trinity | XLOC_080628 | c83345_g1_i1:6-660   | cdRNA01-preDia | cdRNA05-postDia | 5.88307 | 39.0575 | 2.73096  | 5.00E-05 | 0.0249845 |
| RNA-Seq | Trinity | XLOC_080642 | c8335_g1_i1:0-2442   | cdRNA03-Dia-R2 | cdRNA05-postDia | 7.93215 | 38.4664 | 2.27782  | 0.0001   | 0.0432976 |
| RNA-Seq | Trinity | XLOC_080684 | c83401_g1_i1:0-890   | cdRNA03-Dia-R2 | cdRNA05-postDia | 1.55265 | 17.3712 | 3.4839   | 5.00E-05 | 0.0249845 |
| RNA-Seq | Trinity | XLOC_081065 | c83767_g1_i1:4-580   | cdRNA04-Dia-R3 | cdRNA05-postDia | 4.58498 | 28.1766 | 2.61951  | 0.0001   | 0.0432976 |
| RNA-Seq | Trinity | XLOC_081090 | c8378_g1_i1:0-856    | cdRNA01-preDia | cdRNA05-postDia | 3.3332  | 75.92   | 4.5095   | 5.00E-05 | 0.0249845 |
| RNA-Seq | Trinity | XLOC_081187 | c8387_g1_i1:0-469    | cdRNA02-Dia-R1 | cdRNA05-postDia | 3.70569 | 40.6058 | 3.45387  | 5.00E-05 | 0.0249845 |
| RNA-Seq | Trinity | XLOC_081441 | c8412_g1_i1:6-641    | cdRNA01-preDia | cdRNA03-Dia-R2  | 32.729  | 1.18985 | -4.78171 | 0.0001   | 0.0432976 |
| RNA-Seq | Trinity | XLOC_081441 | c8412_g1_i1:6-641    | cdRNA01-preDia | cdRNA04-Dia-R3  | 32.729  | 1.14324 | -4.83937 | 5.00E-05 | 0.0249845 |
| RNA-Seq | Trinity | XLOC_081441 | c8412_g1_i1:6-641    | cdRNA01-preDia | cdRNA05-postDia | 32.729  | 2.95904 | -3.46737 | 5.00E-05 | 0.0249845 |
| RNA-Seq | Trinity | XLOC_081537 | c84221_g1_i1:0-690   | cdRNA02-Dia-R1 | cdRNA05-postDia | 2.38803 | 16.6471 | 2.80138  | 5.00E-05 | 0.0249845 |
| RNA-Seq | Trinity | XLOC_081557 | c84240_g1_i1:0-476   | cdRNA03-Dia-R2 | cdRNA05-postDia | 117.763 | 23.1504 | -2.34677 | 5.00E-05 | 0.0249845 |
| RNA-Seq | Trinity | XLOC_081588 | c8426_g2_i1:1-241    | cdRNA02-Dia-R1 | cdRNA05-postDia | 24.7508 | 151.094 | 2.60989  | 0.0001   | 0.0432976 |
| RNA-Seq | Trinity | XLOC_081661 | c8433_g1_i2:0-389    | cdRNA03-Dia-R2 | cdRNA05-postDia | 6.39185 | 120.113 | 4.23201  | 5.00E-05 | 0.0249845 |
| RNA-Seq | Trinity | XLOC_081661 | c8433_g1_i2:0-389    | cdRNA04-Dia-R3 | cdRNA05-postDia | 3.88957 | 120.113 | 4.94864  | 5.00E-05 | 0.0249845 |
| RNA-Seq | Trinity | XLOC_081770 | c84445_g1_i1:0-297   | cdRNA01-preDia | cdRNA03-Dia-R2  | 722.132 | 107.168 | -2.75239 | 5.00E-05 | 0.0249845 |
| RNA-Seq | Trinity | XLOC_081770 | c84445_g1_i1:0-297   | cdRNA01-preDia | cdRNA04-Dia-R3  | 722.132 | 109.21  | -2.72516 | 5.00E-05 | 0.0249845 |
| RNA-Seq | Trinity | XLOC_082042 | c84721_g1_i1:0-260   | cdRNA04-Dia-R3 | cdRNA05-postDia | 38.2928 | 555.893 | 3.85966  | 5.00E-05 | 0.0249845 |
| RNA-Seq | Trinity | XLOC_082042 | c84721_g1_i1:0-260   | cdRNA03-Dia-R2 | cdRNA05-postDia | 37.4749 | 555.893 | 3.89081  | 5.00E-05 | 0.0249845 |
| RNA-Seq | Trinity | XLOC_082042 | c84721_g1_i1:0-260   | cdRNA01-preDia | cdRNA05-postDia | 29.1951 | 555.893 | 4.25101  | 5.00E-05 | 0.0249845 |
| RNA-Seq | Trinity | XLOC_082042 | c84721_g1_i1:0-260   | cdRNA02-Dia-R1 | cdRNA05-postDia | 26.9236 | 555.893 | 4.36787  | 5.00E-05 | 0.0249845 |
| RNA-Seq | Trinity | XLOC_082117 | c84793_g1_i1:0-527   | cdRNA04-Dia-R3 | cdRNA05-postDia | 27.1066 | 4.56534 | -2.56985 | 0.0001   | 0.0432976 |
| RNA-Seq | Trinity | XLOC_084629 | c87281_g1_i1:0-366   | cdRNA02-Dia-R1 | cdRNA05-postDia | 11.1757 | 65.022  | 2.54056  | 5.00E-05 | 0.0249845 |
| RNA-Seq | Trinity | XLOC_084629 | c87281_g1_i1:0-366   | cdRNA03-Dia-R2 | cdRNA05-postDia | 10.9289 | 65.022  | 2.57278  | 5.00E-05 | 0.0249845 |
| RNA-Seq | Trinity | XLOC_084629 | c87281_g1_i1:0-366   | cdRNA04-Dia-R3 | cdRNA05-postDia | 9.56732 | 65.022  | 2.76474  | 5.00E-05 | 0.0249845 |
| RNA-Seq | Trinity | XLOC_084752 | c87405_g1_i1:0-237   | cdRNA01-preDia | cdRNA04-Dia-R3  | 463.911 | 89.306  | -2.37702 | 5.00E-05 | 0.0249845 |
| RNA-Seq | Trinity | XLOC_084982 | c87644_g1_i1:0-610   | cdRNA03-Dia-R2 | cdRNA05-postDia | 2.81773 | 22.9703 | 3.02717  | 5.00E-05 | 0.0249845 |
| RNA-Seq | Trinity | XLOC_085030 | c8768_g1_i1:0-1819   | cdRNA01-preDia | cdRNA03-Dia-R2  | 38.2417 | 5.81355 | -2.71766 | 5.00E-05 | 0.0249845 |
| RNA-Seq | Trinity | XLOC_085030 | c8768_g1_i1:0-1819   | cdRNA01-preDia | cdRNA04-Dia-R3  | 38.2417 | 6.43069 | -2.5721  | 5.00E-05 | 0.0249845 |
| RNA-Seq | Trinity | XLOC_085148 | c87812_g1_i1:23-238  | cdRNA02-Dia-R1 | cdRNA05-postDia | 44.6672 | 366.683 | 3.03725  | 5.00E-05 | 0.0249845 |
| RNA-Seq | Trinity | XLOC_085148 | c87812_g1_i1:23-238  | cdRNA01-preDia | cdRNA05-postDia | 16.4747 | 366.683 | 4.47621  | 5.00E-05 | 0.0249845 |
| RNA-Seq | Trinity | XLOC_085148 | c87812_g1_i1:23-238  | cdRNA03-Dia-R2 | cdRNA05-postDia | 14.2547 | 366.683 | 4.68503  | 0.0001   | 0.0432976 |
| RNA-Seq | Trinity | XLOC_086304 | c89041_g1_i1:0-734   | cdRNA01-preDia | cdRNA05-postDia | 2.60937 | 32.1846 | 3.6246   | 5.00E-05 | 0.0249845 |
| RNA-Seq | Trinity | XLOC_086771 | c89551_g1_i1:0-6398  | cdRNA01-preDia | cdRNA05-postDia | 3.15782 | 17.8044 | 2.49523  | 5.00E-05 | 0.0249845 |
| RNA-Seq | Trinity | XLOC_086853 | c89626_g1_i1:23-3789 | cdRNA01-preDia | cdRNA04-Dia-R3  | 8.60837 | 48.3426 | 2.48948  | 0.0001   | 0.0432976 |
| RNA-Seq | Trinity | XLOC_086853 | c89626_g1_i1:23-3789 | cdRNA01-preDia | cdRNA03-Dia-R2  | 8.60837 | 49.1289 | 2.51276  | 5.00E-05 | 0.0249845 |
| RNA-Seq | Trinity | XLOC_087048 | c89808_g1_i1:0-2041  | cdRNA04-Dia-R3 | cdRNA05-postDia | 3.34261 | 18.5283 | 2.47069  | 0.0001   | 0.0432976 |
| RNA-Seq | Trinity | XLOC_087048 | c89808_g1_i1:0-2041  | cdRNA03-Dia-R2 | cdRNA05-postDia | 3.32859 | 18.5283 | 2.47675  | 0.0001   | 0.0432976 |
| RNA-Seq | Trinity | XLOC_087090 | c89843_g1_i1:0-602   | cdRNA01-preDia | cdRNA05-postDia | 3.87188 | 66.0903 | 4.09333  | 5.00E-05 | 0.0249845 |
| RNA-Seq | Trinity | XLOC_087090 | c89843_g1_i1:0-602   | cdRNA04-Dia-R3 | cdRNA05-postDia | 3.71407 | 66.0903 | 4.15336  | 5.00E-05 | 0.0249845 |
| RNA-Seq | Trinity | XLOC_087090 | c89843_g1_i1:0-602   | cdRNA02-Dia-R1 | cdRNA05-postDia | 3.36463 | 66.0903 | 4.29592  | 5.00E-05 | 0.0249845 |
| RNA-Seq | Trinity | XLOC_087090 | c89843_g1_i1:0-602   | cdRNA03-Dia-R2 | cdRNA05-postDia | 2.87436 | 66.0903 | 4.52312  | 5.00E-05 | 0.0249845 |
| RNA-Seq | Trinity | XLOC_087342 | c90072_g1_i1:0-1115  | cdRNA01-preDia | cdRNA05-postDia | 24.5063 | 161.958 | 2.72439  | 5.00E-05 | 0.0249845 |
| RNA-Seq | Trinity | XLOC_087365 | c90095_g1_i1:0-1014  | cdRNA02-Dia-R1 | cdRNA05-postDia | 10.6176 | 1.42691 | -2.8955  | 5.00E-05 | 0.0249845 |
| RNA-Seq | Trinity | XLOC_087375 | c90104_g1_i1:0-678   | cdRNA04-Dia-R3 | cdRNA05-postDia | 42.9405 | 5.4653  | -2.97397 | 5.00E-05 | 0.0249845 |
| RNA-Seq | Trinity | XLOC_087375 | c90104_g1_i1:0-678   | cdRNA03-Dia-R2 | cdRNA05-postDia | 39.8645 | 5.4653  | -2.86673 | 5.00E-05 | 0.0249845 |
| RNA-Seq | Trinity | XLOC_088079 | c90757_g1_i1:0-764   | cdRNA01-preDia | cdRNA03-Dia-R2  | 2.11679 | 16.2725 | 2.94249  | 5.00E-05 | 0.0249845 |

|         |         |             |                      |                |                 |         |         |          |          |           |
|---------|---------|-------------|----------------------|----------------|-----------------|---------|---------|----------|----------|-----------|
| RNA-Seq | Trinity | XLOC_088079 | c90757_g1_i1:0-764   | cdRNA01-preDia | cdRNA04-Dia-R3  | 2.11679 | 16.3795 | 2.95194  | 5.00E-05 | 0.0249845 |
| RNA-Seq | Trinity | XLOC_088359 | c9100_g1_i1:0-1252   | cdRNA01-preDia | cdRNA05-postDia | 7.38999 | 70.165  | 3.24711  | 5.00E-05 | 0.0249845 |
| RNA-Seq | Trinity | XLOC_088359 | c9100_g1_i1:0-1252   | cdRNA01-preDia | cdRNA04-Dia-R3  | 7.38999 | 71.322  | 3.2707   | 5.00E-05 | 0.0249845 |
| RNA-Seq | Trinity | XLOC_088359 | c9100_g1_i1:0-1252   | cdRNA01-preDia | cdRNA03-Dia-R2  | 7.38999 | 74.9831 | 3.34292  | 5.00E-05 | 0.0249845 |
| RNA-Seq | Trinity | XLOC_088467 | c9110_g1_i1:4-681    | cdRNA02-Dia-R1 | cdRNA03-Dia-R2  | 33.03   | 5.83802 | -2.50023 | 5.00E-05 | 0.0249845 |
| RNA-Seq | Trinity | XLOC_088467 | c9110_g1_i1:4-681    | cdRNA04-Dia-R3 | cdRNA05-postDia | 6.97155 | 77.35   | 3.47185  | 5.00E-05 | 0.0249845 |
| RNA-Seq | Trinity | XLOC_088467 | c9110_g1_i1:4-681    | cdRNA03-Dia-R2 | cdRNA05-postDia | 5.83802 | 77.35   | 3.72785  | 5.00E-05 | 0.0249845 |
| RNA-Seq | Trinity | XLOC_088467 | c9110_g1_i1:4-681    | cdRNA01-preDia | cdRNA05-postDia | 5.17933 | 77.35   | 3.90057  | 5.00E-05 | 0.0249845 |
| RNA-Seq | Trinity | XLOC_088470 | c91112_g1_i1:0-737   | cdRNA03-Dia-R2 | cdRNA05-postDia | 3.6266  | 24.526  | 2.75763  | 0.0001   | 0.0432976 |
| RNA-Seq | Trinity | XLOC_088556 | c91190_g1_i1:1-1997  | cdRNA04-Dia-R3 | cdRNA05-postDia | 4.46336 | 34.83   | 2.96413  | 5.00E-05 | 0.0249845 |
| RNA-Seq | Trinity | XLOC_088556 | c91190_g1_i1:1-1997  | cdRNA03-Dia-R2 | cdRNA05-postDia | 4.1266  | 34.83   | 3.0773   | 5.00E-05 | 0.0249845 |
| RNA-Seq | Trinity | XLOC_088589 | c91221_g1_i1:27-512  | cdRNA02-Dia-R1 | cdRNA05-postDia | 11.1195 | 59.2845 | 2.41456  | 0.0001   | 0.0432976 |
| RNA-Seq | Trinity | XLOC_088996 | c91601_g1_i1:0-636   | cdRNA03-Dia-R2 | cdRNA05-postDia | 10.3186 | 54.6155 | 2.40406  | 0.0001   | 0.0432976 |
| RNA-Seq | Trinity | XLOC_088998 | c91603_g1_i1:0-266   | cdRNA02-Dia-R1 | cdRNA05-postDia | 40.228  | 236.831 | 2.55758  | 5.00E-05 | 0.0249845 |
| RNA-Seq | Trinity | XLOC_088998 | c91603_g1_i1:0-266   | cdRNA01-preDia | cdRNA05-postDia | 22.2561 | 236.831 | 3.41158  | 5.00E-05 | 0.0249845 |
| RNA-Seq | Trinity | XLOC_089447 | c92009_g1_i1:19-1227 | cdRNA03-Dia-R2 | cdRNA05-postDia | 19.1351 | 2.2627  | -3.08011 | 5.00E-05 | 0.0249845 |
| RNA-Seq | Trinity | XLOC_089447 | c92009_g1_i1:19-1227 | cdRNA04-Dia-R3 | cdRNA05-postDia | 18.7629 | 2.2627  | -3.05177 | 5.00E-05 | 0.0249845 |
| RNA-Seq | Trinity | XLOC_089455 | c92017_g1_i1:0-1168  | cdRNA03-Dia-R2 | cdRNA05-postDia | 107.309 | 13.6902 | -2.97055 | 5.00E-05 | 0.0249845 |
| RNA-Seq | Trinity | XLOC_089455 | c92017_g1_i1:0-1168  | cdRNA04-Dia-R3 | cdRNA05-postDia | 104.48  | 13.6902 | -2.93201 | 5.00E-05 | 0.0249845 |
| RNA-Seq | Trinity | XLOC_089755 | c9229_g1_i1:0-2555   | cdRNA01-preDia | cdRNA02-Dia-R1  | 4.90775 | 29.5819 | 2.59158  | 5.00E-05 | 0.0249845 |
| RNA-Seq | Trinity | XLOC_089755 | c9229_g1_i1:0-2555   | cdRNA01-preDia | cdRNA05-postDia | 4.90775 | 36.0581 | 2.87719  | 5.00E-05 | 0.0249845 |
| RNA-Seq | Trinity | XLOC_090028 | c92547_g1_i1:0-964   | cdRNA04-Dia-R3 | cdRNA05-postDia | 5.38624 | 29.1047 | 2.4339   | 5.00E-05 | 0.0249845 |
| RNA-Seq | Trinity | XLOC_090028 | c92547_g1_i1:0-964   | cdRNA03-Dia-R2 | cdRNA05-postDia | 4.82728 | 29.1047 | 2.59197  | 5.00E-05 | 0.0249845 |
| RNA-Seq | Trinity | XLOC_090196 | c926_g1_i1:0-355     | cdRNA02-Dia-R1 | cdRNA05-postDia | 11.7729 | 89.0843 | 2.9197   | 5.00E-05 | 0.0249845 |
| RNA-Seq | Trinity | XLOC_090196 | c926_g1_i1:0-355     | cdRNA04-Dia-R3 | cdRNA05-postDia | 9.4968  | 89.0843 | 3.22966  | 5.00E-05 | 0.0249845 |
| RNA-Seq | Trinity | XLOC_090196 | c926_g1_i1:0-355     | cdRNA03-Dia-R2 | cdRNA05-postDia | 8.32341 | 89.0843 | 3.41992  | 5.00E-05 | 0.0249845 |
| RNA-Seq | Trinity | XLOC_090196 | c926_g1_i1:0-355     | cdRNA01-preDia | cdRNA05-postDia | 6.77389 | 89.0843 | 3.71711  | 5.00E-05 | 0.0249845 |
| RNA-Seq | Trinity | XLOC_090323 | c92812_g1_i1:16-1438 | cdRNA02-Dia-R1 | cdRNA05-postDia | 5.08199 | 31.0531 | 2.61127  | 5.00E-05 | 0.0249845 |
| RNA-Seq | Trinity | XLOC_090499 | c9297_g1_i1:0-464    | cdRNA02-Dia-R1 | cdRNA05-postDia | 14.5355 | 74.1893 | 2.35163  | 0.0001   | 0.0432976 |
| RNA-Seq | Trinity | XLOC_090499 | c9297_g1_i1:0-464    | cdRNA01-preDia | cdRNA05-postDia | 3.64729 | 74.1893 | 4.34631  | 5.00E-05 | 0.0249845 |
| RNA-Seq | Trinity | XLOC_090521 | c9299_g1_i1:5-434    | cdRNA02-Dia-R1 | cdRNA05-postDia | 4.89339 | 47.4691 | 3.27808  | 5.00E-05 | 0.0249845 |
| RNA-Seq | Trinity | XLOC_090521 | c9299_g1_i1:5-434    | cdRNA04-Dia-R3 | cdRNA05-postDia | 3.87433 | 47.4691 | 3.61497  | 0.0001   | 0.0432976 |
| RNA-Seq | Trinity | XLOC_090521 | c9299_g1_i1:5-434    | cdRNA03-Dia-R2 | cdRNA05-postDia | 2.62977 | 47.4691 | 4.17398  | 5.00E-05 | 0.0249845 |
| RNA-Seq | Trinity | XLOC_090521 | c9299_g1_i1:5-434    | cdRNA01-preDia | cdRNA05-postDia | 2.45849 | 47.4691 | 4.27115  | 0.0001   | 0.0432976 |
| RNA-Seq | Trinity | XLOC_090522 | c9299_g2_i1:0-323    | cdRNA02-Dia-R1 | cdRNA05-postDia | 12.7915 | 111.024 | 3.11761  | 5.00E-05 | 0.0249845 |
| RNA-Seq | Trinity | XLOC_090522 | c9299_g2_i1:0-323    | cdRNA04-Dia-R3 | cdRNA05-postDia | 7.51954 | 111.024 | 3.88409  | 5.00E-05 | 0.0249845 |
| RNA-Seq | Trinity | XLOC_090522 | c9299_g2_i1:0-323    | cdRNA03-Dia-R2 | cdRNA05-postDia | 5.21744 | 111.024 | 4.41139  | 5.00E-05 | 0.0249845 |
| RNA-Seq | Trinity | XLOC_090579 | c93051_g1_i1:0-876   | cdRNA01-preDia | cdRNA05-postDia | 9.11399 | 70.1021 | 2.9433   | 5.00E-05 | 0.0249845 |
| RNA-Seq | Trinity | XLOC_090587 | c93059_g1_i1:13-1214 | cdRNA02-Dia-R1 | cdRNA05-postDia | 1.55212 | 9.83389 | 2.66352  | 5.00E-05 | 0.0249845 |
| RNA-Seq | Trinity | XLOC_090587 | c93059_g1_i1:13-1214 | cdRNA04-Dia-R3 | cdRNA05-postDia | 1.36863 | 9.83389 | 2.84503  | 5.00E-05 | 0.0249845 |
| RNA-Seq | Trinity | XLOC_090628 | c9309_g1_i1:0-453    | cdRNA02-Dia-R1 | cdRNA05-postDia | 15.2971 | 129.965 | 3.08678  | 5.00E-05 | 0.0249845 |
| RNA-Seq | Trinity | XLOC_090628 | c9309_g1_i1:0-453    | cdRNA03-Dia-R2 | cdRNA05-postDia | 9.18855 | 129.965 | 3.82214  | 5.00E-05 | 0.0249845 |
| RNA-Seq | Trinity | XLOC_090628 | c9309_g1_i1:0-453    | cdRNA04-Dia-R3 | cdRNA05-postDia | 8.3719  | 129.965 | 3.95642  | 5.00E-05 | 0.0249845 |
| RNA-Seq | Trinity | XLOC_090628 | c9309_g1_i1:0-453    | cdRNA01-preDia | cdRNA05-postDia | 5.55393 | 129.965 | 4.54846  | 5.00E-05 | 0.0249845 |
| RNA-Seq | Trinity | XLOC_090936 | c93386_g1_i1:0-555   | cdRNA01-preDia | cdRNA02-Dia-R1  | 3.2646  | 43.8318 | 3.747    | 5.00E-05 | 0.0249845 |
| RNA-Seq | Trinity | XLOC_090982 | c93429_g1_i1:0-224   | cdRNA02-Dia-R1 | cdRNA05-postDia | 36.0374 | 217.187 | 2.59137  | 5.00E-05 | 0.0249845 |
| RNA-Seq | Trinity | XLOC_091158 | c93592_g1_i1:0-756   | cdRNA04-Dia-R3 | cdRNA05-postDia | 14.0763 | 67.6521 | 2.26487  | 5.00E-05 | 0.0249845 |

|         |         |             |                     |                |                 |         |         |          |          |           |
|---------|---------|-------------|---------------------|----------------|-----------------|---------|---------|----------|----------|-----------|
| RNA-Seq | Trinity | XLOC_091732 | c9412_g1_i2:0-1624  | cdRNA01-preDia | cdRNA05-postDia | 20.0352 | 139.073 | 2.79523  | 5.00E-05 | 0.0249845 |
| RNA-Seq | Trinity | XLOC_091733 | c9412_g1_i3:0-1941  | cdRNA01-preDia | cdRNA05-postDia | 12.2842 | 66.9764 | 2.44685  | 5.00E-05 | 0.0249845 |
| RNA-Seq | Trinity | XLOC_091766 | c94160_g1_i1:1-796  | cdRNA01-preDia | cdRNA05-postDia | 5.34869 | 30.2115 | 2.49784  | 5.00E-05 | 0.0249845 |
| RNA-Seq | Trinity | XLOC_091927 | c94316_g1_i1:0-752  | cdRNA01-preDia | cdRNA05-postDia | 18.4588 | 87.2733 | 2.24123  | 5.00E-05 | 0.0249845 |
| RNA-Seq | Trinity | XLOC_091927 | c94316_g1_i1:0-752  | cdRNA02-Dia-R1 | cdRNA05-postDia | 10.4807 | 87.2733 | 3.05781  | 5.00E-05 | 0.0249845 |
| RNA-Seq | Trinity | XLOC_091927 | c94316_g1_i1:0-752  | cdRNA04-Dia-R3 | cdRNA05-postDia | 10.4441 | 87.2733 | 3.06286  | 5.00E-05 | 0.0249845 |
| RNA-Seq | Trinity | XLOC_091927 | c94316_g1_i1:0-752  | cdRNA03-Dia-R2 | cdRNA05-postDia | 9.86213 | 87.2733 | 3.14557  | 5.00E-05 | 0.0249845 |
| RNA-Seq | Trinity | XLOC_092068 | c94449_g1_i1:42-292 | cdRNA01-preDia | cdRNA05-postDia | 18.8161 | 145.051 | 2.94652  | 5.00E-05 | 0.0249845 |
| RNA-Seq | Trinity | XLOC_092104 | c94481_g1_i1:0-265  | cdRNA02-Dia-R1 | cdRNA05-postDia | 100.433 | 688.429 | 2.77707  | 5.00E-05 | 0.0249845 |
| RNA-Seq | Trinity | XLOC_092104 | c94481_g1_i1:0-265  | cdRNA04-Dia-R3 | cdRNA05-postDia | 99.3135 | 688.429 | 2.79325  | 5.00E-05 | 0.0249845 |
| RNA-Seq | Trinity | XLOC_092104 | c94481_g1_i1:0-265  | cdRNA03-Dia-R2 | cdRNA05-postDia | 80.3312 | 688.429 | 3.09928  | 5.00E-05 | 0.0249845 |
| RNA-Seq | Trinity | XLOC_092104 | c94481_g1_i1:0-265  | cdRNA01-preDia | cdRNA05-postDia | 61.3322 | 688.429 | 3.48859  | 5.00E-05 | 0.0249845 |
| RNA-Seq | Trinity | XLOC_092110 | c94487_g1_i1:0-1423 | cdRNA04-Dia-R3 | cdRNA05-postDia | 15.7024 | 2.58291 | -2.60392 | 5.00E-05 | 0.0249845 |
| RNA-Seq | Trinity | XLOC_092110 | c94487_g1_i1:0-1423 | cdRNA03-Dia-R2 | cdRNA05-postDia | 15.566  | 2.58291 | -2.59133 | 5.00E-05 | 0.0249845 |
| RNA-Seq | Trinity | XLOC_092253 | c9461_g1_i1:2-1684  | cdRNA04-Dia-R3 | cdRNA05-postDia | 12.0019 | 1.86064 | -2.6894  | 0.0001   | 0.0432976 |
| RNA-Seq | Trinity | XLOC_092253 | c9461_g1_i1:2-1684  | cdRNA03-Dia-R2 | cdRNA05-postDia | 11.9041 | 1.86064 | -2.67759 | 0.0001   | 0.0432976 |
| RNA-Seq | Trinity | XLOC_092391 | c9474_g1_i1:3-899   | cdRNA01-preDia | cdRNA02-Dia-R1  | 22.155  | 1.03209 | -4.42399 | 5.00E-05 | 0.0249845 |
| RNA-Seq | Trinity | XLOC_092391 | c9474_g1_i1:3-899   | cdRNA01-preDia | cdRNA05-postDia | 22.155  | 2.24616 | -3.3021  | 5.00E-05 | 0.0249845 |
| RNA-Seq | Trinity | XLOC_092429 | c94787_g1_i1:0-448  | cdRNA04-Dia-R3 | cdRNA05-postDia | 8.23277 | 49.327  | 2.58293  | 5.00E-05 | 0.0249845 |
| RNA-Seq | Trinity | XLOC_092429 | c94787_g1_i1:0-448  | cdRNA01-preDia | cdRNA05-postDia | 3.07677 | 49.327  | 4.00289  | 5.00E-05 | 0.0249845 |
| RNA-Seq | Trinity | XLOC_092463 | c94819_g1_i1:0-561  | cdRNA03-Dia-R2 | cdRNA05-postDia | 30.6081 | 4.80038 | -2.67269 | 5.00E-05 | 0.0249845 |
| RNA-Seq | Trinity | XLOC_092463 | c94819_g1_i1:0-561  | cdRNA04-Dia-R3 | cdRNA05-postDia | 28.5596 | 4.80038 | -2.57275 | 5.00E-05 | 0.0249845 |
| RNA-Seq | Trinity | XLOC_092621 | c94969_g1_i1:0-529  | cdRNA01-preDia | cdRNA05-postDia | 8.51044 | 46.3534 | 2.44537  | 5.00E-05 | 0.0249845 |
| RNA-Seq | Trinity | XLOC_092621 | c94969_g1_i1:0-529  | cdRNA03-Dia-R2 | cdRNA05-postDia | 7.03993 | 46.3534 | 2.71904  | 5.00E-05 | 0.0249845 |
| RNA-Seq | Trinity | XLOC_092621 | c94969_g1_i1:0-529  | cdRNA02-Dia-R1 | cdRNA05-postDia | 5.67693 | 46.3534 | 3.02949  | 5.00E-05 | 0.0249845 |
| RNA-Seq | Trinity | XLOC_093138 | c95457_g1_i1:0-847  | cdRNA03-Dia-R2 | cdRNA05-postDia | 55.0318 | 7.68587 | -2.83998 | 5.00E-05 | 0.0249845 |
| RNA-Seq | Trinity | XLOC_093138 | c95457_g1_i1:0-847  | cdRNA01-preDia | cdRNA05-postDia | 48.1168 | 7.68587 | -2.64626 | 5.00E-05 | 0.0249845 |
| RNA-Seq | Trinity | XLOC_093138 | c95457_g1_i1:0-847  | cdRNA04-Dia-R3 | cdRNA05-postDia | 46.2146 | 7.68587 | -2.58807 | 5.00E-05 | 0.0249845 |
| RNA-Seq | Trinity | XLOC_093138 | c95457_g1_i1:0-847  | cdRNA02-Dia-R1 | cdRNA05-postDia | 36.238  | 7.68587 | -2.23722 | 5.00E-05 | 0.0249845 |
| RNA-Seq | Trinity | XLOC_093174 | c9548_g1_i1:0-1100  | cdRNA01-preDia | cdRNA04-Dia-R3  | 3.17521 | 30.8387 | 3.27982  | 5.00E-05 | 0.0249845 |
| RNA-Seq | Trinity | XLOC_093174 | c9548_g1_i1:0-1100  | cdRNA01-preDia | cdRNA03-Dia-R2  | 3.17521 | 34.0335 | 3.42203  | 5.00E-05 | 0.0249845 |
| RNA-Seq | Trinity | XLOC_093236 | c95550_g1_i1:0-570  | cdRNA01-preDia | cdRNA05-postDia | 5.5059  | 49.5457 | 3.16971  | 5.00E-05 | 0.0249845 |
| RNA-Seq | Trinity | XLOC_093308 | c95612_g1_i1:0-1029 | cdRNA01-preDia | cdRNA05-postDia | 1.34107 | 9.4203  | 2.81239  | 5.00E-05 | 0.0249845 |
| RNA-Seq | Trinity | XLOC_093308 | c95612_g1_i1:0-1029 | cdRNA01-preDia | cdRNA03-Dia-R2  | 1.34107 | 11.7629 | 3.13279  | 5.00E-05 | 0.0249845 |
| RNA-Seq | Trinity | XLOC_093308 | c95612_g1_i1:0-1029 | cdRNA01-preDia | cdRNA04-Dia-R3  | 1.34107 | 11.8074 | 3.13824  | 5.00E-05 | 0.0249845 |
| RNA-Seq | Trinity | XLOC_093564 | c95853_g1_i1:0-318  | cdRNA01-preDia | cdRNA05-postDia | 8.83364 | 76.4201 | 3.11287  | 0.0001   | 0.0432976 |
| RNA-Seq | Trinity | XLOC_093635 | c9591_g1_i1:0-1170  | cdRNA01-preDia | cdRNA05-postDia | 8.67176 | 68.9421 | 2.99099  | 5.00E-05 | 0.0249845 |
| RNA-Seq | Trinity | XLOC_093635 | c9591_g1_i1:0-1170  | cdRNA03-Dia-R2 | cdRNA05-postDia | 8.04496 | 68.9421 | 3.09923  | 5.00E-05 | 0.0249845 |
| RNA-Seq | Trinity | XLOC_093635 | c9591_g1_i1:0-1170  | cdRNA04-Dia-R3 | cdRNA05-postDia | 7.72977 | 68.9421 | 3.15689  | 5.00E-05 | 0.0249845 |
| RNA-Seq | Trinity | XLOC_093635 | c9591_g1_i1:0-1170  | cdRNA02-Dia-R1 | cdRNA05-postDia | 6.16126 | 68.9421 | 3.48409  | 5.00E-05 | 0.0249845 |
| RNA-Seq | Trinity | XLOC_093645 | c95930_g1_i1:0-579  | cdRNA01-preDia | cdRNA02-Dia-R1  | 34.1392 | 1.74582 | -4.28945 | 5.00E-05 | 0.0249845 |
| RNA-Seq | Trinity | XLOC_093833 | c96102_g1_i1:0-345  | cdRNA04-Dia-R3 | cdRNA05-postDia | 12.0153 | 74.6814 | 2.63587  | 0.0001   | 0.0432976 |
| RNA-Seq | Trinity | XLOC_093833 | c96102_g1_i1:0-345  | cdRNA03-Dia-R2 | cdRNA05-postDia | 10.2821 | 74.6814 | 2.86061  | 0.0001   | 0.0432976 |
| RNA-Seq | Trinity | XLOC_093833 | c96102_g1_i1:0-345  | cdRNA01-preDia | cdRNA05-postDia | 10.0207 | 74.6814 | 2.89777  | 5.00E-05 | 0.0249845 |
| RNA-Seq | Trinity | XLOC_093931 | c96192_g1_i1:0-279  | cdRNA03-Dia-R2 | cdRNA05-postDia | 19.3304 | 120.594 | 2.64122  | 0.0001   | 0.0432976 |
| RNA-Seq | Trinity | XLOC_093931 | c96192_g1_i1:0-279  | cdRNA04-Dia-R3 | cdRNA05-postDia | 19.0374 | 120.594 | 2.66326  | 5.00E-05 | 0.0249845 |
| RNA-Seq | Trinity | XLOC_093931 | c96192_g1_i1:0-279  | cdRNA02-Dia-R1 | cdRNA05-postDia | 18.2277 | 120.594 | 2.72596  | 5.00E-05 | 0.0249845 |



|         |         |             |                     |                |                 |         |         |          |          |           |
|---------|---------|-------------|---------------------|----------------|-----------------|---------|---------|----------|----------|-----------|
| RNA-Seq | Trinity | XLOC_094082 | c96331_g1_i1:0-456  | cdRNA03-Dia-R2 | cdRNA05-postDia | 5.79188 | 52.822  | 3.18903  | 5.00E-05 | 0.0249845 |
| RNA-Seq | Trinity | XLOC_094082 | c96331_g1_i1:0-456  | cdRNA04-Dia-R3 | cdRNA05-postDia | 5.56496 | 52.822  | 3.24669  | 5.00E-05 | 0.0249845 |
| RNA-Seq | Trinity | XLOC_094109 | c96358_g1_i1:0-785  | cdRNA02-Dia-R1 | cdRNA05-postDia | 8.55368 | 43.1475 | 2.33466  | 0.0001   | 0.0432976 |
| RNA-Seq | Trinity | XLOC_094252 | c96493_g1_i1:0-1058 | cdRNA04-Dia-R3 | cdRNA05-postDia | 38.2139 | 4.99356 | -2.93596 | 5.00E-05 | 0.0249845 |
| RNA-Seq | Trinity | XLOC_094252 | c96493_g1_i1:0-1058 | cdRNA03-Dia-R2 | cdRNA05-postDia | 36.5387 | 4.99356 | -2.87128 | 5.00E-05 | 0.0249845 |
| RNA-Seq | Trinity | XLOC_094524 | c96749_g1_i1:0-229  | cdRNA01-preDia | cdRNA03-Dia-R2  | 23.1324 | 190.084 | 3.03866  | 0.0001   | 0.0432976 |
| RNA-Seq | Trinity | XLOC_094524 | c96749_g1_i1:0-229  | cdRNA01-preDia | cdRNA04-Dia-R3  | 23.1324 | 200.559 | 3.11605  | 0.0001   | 0.0432976 |
| RNA-Seq | Trinity | XLOC_094785 | c9699_g1_i1:0-298   | cdRNA01-preDia | cdRNA05-postDia | 12.0876 | 102.413 | 3.0828   | 5.00E-05 | 0.0249845 |
| RNA-Seq | Trinity | XLOC_094850 | c97058_g1_i1:0-1735 | cdRNA03-Dia-R2 | cdRNA05-postDia | 6.59632 | 44.5933 | 2.75709  | 5.00E-05 | 0.0249845 |
| RNA-Seq | Trinity | XLOC_094850 | c97058_g1_i1:0-1735 | cdRNA02-Dia-R3 | cdRNA05-postDia | 6.04079 | 44.5933 | 2.88402  | 5.00E-05 | 0.0249845 |
| RNA-Seq | Trinity | XLOC_094850 | c97058_g1_i1:0-1735 | cdRNA01-preDia | cdRNA05-postDia | 5.21347 | 44.5933 | 3.09651  | 5.00E-05 | 0.0249845 |
| RNA-Seq | Trinity | XLOC_094850 | c97058_g1_i1:0-1735 | cdRNA02-Dia-R1 | cdRNA05-postDia | 4.06247 | 44.5933 | 3.4564   | 5.00E-05 | 0.0249845 |
| RNA-Seq | Trinity | XLOC_095094 | c9729_g1_i1:0-222   | cdRNA04-Dia-R3 | cdRNA05-postDia | 126.743 | 795.638 | 2.65021  | 5.00E-05 | 0.0249845 |
| RNA-Seq | Trinity | XLOC_095094 | c9729_g1_i1:0-222   | cdRNA03-Dia-R2 | cdRNA05-postDia | 122.067 | 795.638 | 2.70444  | 5.00E-05 | 0.0249845 |
| RNA-Seq | Trinity | XLOC_095094 | c9729_g1_i1:0-222   | cdRNA01-preDia | cdRNA05-postDia | 118.323 | 795.638 | 2.74938  | 5.00E-05 | 0.0249845 |
| RNA-Seq | Trinity | XLOC_095539 | c97717_g1_i1:0-692  | cdRNA01-preDia | cdRNA05-postDia | 13.1981 | 68.1123 | 2.36759  | 0.0001   | 0.0432976 |
| RNA-Seq | Trinity | XLOC_095927 | c98083_g1_i1:0-545  | cdRNA02-Dia-R1 | cdRNA05-postDia | 11.5193 | 60.541  | 2.39386  | 0.0001   | 0.0432976 |
| RNA-Seq | Trinity | XLOC_096375 | c9849_g1_i2:0-825   | cdRNA02-Dia-R1 | cdRNA05-postDia | 13.1302 | 77.5277 | 2.56182  | 5.00E-05 | 0.0249845 |
| RNA-Seq | Trinity | XLOC_096375 | c9849_g1_i2:0-825   | cdRNA01-preDia | cdRNA05-postDia | 4.6449  | 77.5277 | 4.06099  | 5.00E-05 | 0.0249845 |
| RNA-Seq | Trinity | XLOC_096397 | c98519_g1_i1:7-473  | cdRNA04-Dia-R3 | cdRNA05-postDia | 76.8166 | 12.017  | -2.67634 | 5.00E-05 | 0.0249845 |
| RNA-Seq | Trinity | XLOC_096397 | c98519_g1_i1:7-473  | cdRNA03-Dia-R2 | cdRNA05-postDia | 70.7646 | 12.017  | -2.55795 | 5.00E-05 | 0.0249845 |
| RNA-Seq | Trinity | XLOC_096420 | c98538_g1_i1:0-1099 | cdRNA01-preDia | cdRNA03-Dia-R2  | 11.214  | 1.45454 | -2.94666 | 5.00E-05 | 0.0249845 |
| RNA-Seq | Trinity | XLOC_096420 | c98538_g1_i1:0-1099 | cdRNA01-preDia | cdRNA04-Dia-R3  | 11.214  | 1.56695 | -2.83926 | 0.0001   | 0.0432976 |
| RNA-Seq | Trinity | XLOC_096420 | c98538_g1_i1:0-1099 | cdRNA04-Dia-R3 | cdRNA05-postDia | 1.56695 | 14.6061 | 3.22054  | 5.00E-05 | 0.0249845 |
| RNA-Seq | Trinity | XLOC_096420 | c98538_g1_i1:0-1099 | cdRNA03-Dia-R2 | cdRNA05-postDia | 1.45454 | 14.6061 | 3.32794  | 5.00E-05 | 0.0249845 |
| RNA-Seq | Trinity | XLOC_096557 | c98670_g1_i1:0-349  | cdRNA03-Dia-R2 | cdRNA05-postDia | 7.57441 | 62.3126 | 3.04032  | 5.00E-05 | 0.0249845 |
| RNA-Seq | Trinity | XLOC_096557 | c98670_g1_i1:0-349  | cdRNA04-Dia-R3 | cdRNA05-postDia | 7.27765 | 62.3126 | 3.09798  | 5.00E-05 | 0.0249845 |
| RNA-Seq | Trinity | XLOC_096558 | c98671_g1_i1:0-536  | cdRNA01-preDia | cdRNA03-Dia-R2  | 2.97536 | 45.9829 | 3.94996  | 5.00E-05 | 0.0249845 |
| RNA-Seq | Trinity | XLOC_096558 | c98671_g1_i1:0-536  | cdRNA01-preDia | cdRNA04-Dia-R3  | 2.97536 | 51.1454 | 4.10347  | 5.00E-05 | 0.0249845 |
| RNA-Seq | Trinity | XLOC_096631 | c9873_g1_i1:0-499   | cdRNA04-Dia-R3 | cdRNA05-postDia | 3.08357 | 29.1812 | 3.24237  | 5.00E-05 | 0.0249845 |
| RNA-Seq | Trinity | XLOC_097026 | c99115_g1_i1:1-1066 | cdRNA03-Dia-R2 | cdRNA05-postDia | 9.23365 | 99.0054 | 3.42253  | 5.00E-05 | 0.0249845 |
| RNA-Seq | Trinity | XLOC_097026 | c99115_g1_i1:1-1066 | cdRNA04-Dia-R3 | cdRNA05-postDia | 9.54284 | 99.0054 | 3.37502  | 5.00E-05 | 0.0249845 |
| RNA-Seq | Trinity | XLOC_097289 | c99359_g1_i1:0-394  | cdRNA01-preDia | cdRNA04-Dia-R3  | 22.2387 | 110.649 | 2.31485  | 0.0001   | 0.0432976 |
| RNA-Seq | Trinity | XLOC_097469 | c99527_g1_i1:0-863  | cdRNA01-preDia | cdRNA05-postDia | 14.2704 | 66.7072 | 2.22481  | 0.0001   | 0.0432976 |
| RNA-Seq | Trinity | XLOC_097471 | c9952_g1_i1:0-1093  | cdRNA03-Dia-R2 | cdRNA05-postDia | 10.4724 | 1.25528 | -3.06051 | 5.00E-05 | 0.0249845 |
| RNA-Seq | Trinity | XLOC_097471 | c9952_g1_i1:0-1093  | cdRNA04-Dia-R3 | cdRNA05-postDia | 8.99617 | 1.25528 | -2.8413  | 0.0001   | 0.0432976 |
| RNA-Seq | Trinity | XLOC_097824 | c99863_g1_i1:0-948  | cdRNA01-preDia | cdRNA05-postDia | 3.08036 | 18.749  | 2.60564  | 5.00E-05 | 0.0249845 |







**Supplementary Table S3.** Total number of Kmar embryos used for RNA extraction

| <b>RNA Sample</b> | <b>Embryonic Stage</b> | <b>Diapause?</b> | <b>Total Embryos</b> |
|-------------------|------------------------|------------------|----------------------|
| RNA01-preDia      | 30-31                  | No               | 96                   |
| RNA02-Dia-R1      | 32                     | Yes              | 85                   |
| RNA03-Dia-R2      | 32                     | Yes              | 91                   |
| RNA04-Dia-R3      | 32                     | Yes              | 92                   |
| RNA05-postDia     | Larvae                 | No               | 20                   |

**Supplementary Table S4.** Numbers of filtered RNA-Seq reads for downstream analyses.

| RNA Sample    | Total Reads | Adapters (%) | N <sup>1</sup> (%) | Low Quality <sup>2</sup> (%) | Total Filtered Reads |
|---------------|-------------|--------------|--------------------|------------------------------|----------------------|
| RNA01-preDia  | 32,669,979  | 0.09%        | 0.01%              | 0.29%                        | 32,539,312           |
| RNA02-Dia-R1  | 40,359,918  | 0.05%        | 0.01%              | 0.23%                        | 40,231,019           |
| RNA03-Dia-R2  | 32,492,341  | 0.06%        | 0.01%              | 0.25%                        | 32,380,877           |
| RNA04-Dia-R3  | 33,842,811  | 0.10%        | 0.01%              | 0.25%                        | 33,714,161           |
| RNA05-postDia | 32,041,323  | 0.09%        | 0.01%              | 0.23%                        | 31,906,229           |

<sup>1</sup>>5% of unknown bases;

<sup>2</sup>>50% of bases with Phred score  $\leq 10$

**Supplementary Table S5.** NGS data used in this study and deposited at the NCBI SRA database.

| NGS                 | Sample                                             | No of Reads | NCBI SRA ID <sup>2</sup> | Total Length (nt) | Genome Coverage <sup>3</sup> |
|---------------------|----------------------------------------------------|-------------|--------------------------|-------------------|------------------------------|
| RNA-Seq             | 01. Pre-Diapause, Pooled RNA, 96 Embryos           | 32,539,312  | SRR1999414               | 1,626,965,600     | 2.53                         |
| RNA-Seq             | 02. Diapause, Replicate #1, Pooled RNA, 85 Embryos | 40,231,019  | SRR2001218               | 2,011,550,950     | 3.13                         |
| RNA-Seq             | 03. Diapause, Replicate #2, Pooled RNA, 91 Embryos | 32,380,877  | SRR2001221               | 1,619,043,850     | 2.52                         |
| RNA-Seq             | 04. Diapause, Replicate #3, Pooled RNA, 92 Embryos | 33,714,161  | SRR2001227               | 1,685,708,050     | 2.62                         |
| RNA-Seq             | 05. Post-Diapause, Pooled RNA, 20 Larvae           | 31,906,229  | SRR2001231               | 1,595,311,450     | 2.48                         |
| WGS                 | Kmar FDS08 (Km04), gDNA, sense strand              | 219,138,546 | SRR2079677               | 21,913,854,600    | 34.12                        |
| WGS                 | Kmar FDS08 (Km04), gDNA, anti-sense strand         | 219,138,546 | SRR2080613               | 21,913,854,600    | 34.12                        |
| RADseq <sup>1</sup> | Km01 FDS04 DNA                                     | 970,981     | SRR1585247               | 145,647,150       | 0.23                         |
| RADseq              | Km02 FDS05 gDNA                                    | 885,028     | SRR1585250               | 132,754,200       | 0.21                         |
| RADseq              | Km03 ERIN14 gDNA                                   | 559,997     | SRR1585251               | 83,999,550        | 0.13                         |
| RADseq              | Km04 FDS08 gDNA                                    | 656,403     | SRR1585252               | 98,460,450        | 0.15                         |
| RADseq              | Km05 EPP02 gDNA                                    | 983,923     | SRR1585253               | 147,588,450       | 0.23                         |
| RADseq              | Km07 ERIN15 gDNA                                   | 728,613     | SRR1585254               | 109,291,950       | 0.17                         |
| RADseq              | Km08 ERIN18 gDNA                                   | 932,971     | SRR1585255               | 139,945,650       | 0.22                         |
| RADseq              | Km09 FDS07 gDNA                                    | 1,079,868   | SRR1585256               | 161,980,200       | 0.25                         |
| RADseq              | Km10 PC13 gDNA                                     | 1,017,990   | SRR1585257               | 152,698,500       | 0.24                         |
| RADseq              | Km11 EPP01 gDNA                                    | 1,162,674   | SRR1585258               | 174,401,100       | 0.27                         |
| RADseq              | Km12 EPP07 gDNA                                    | 1,330,378   | SRR1585259               | 199,556,700       | 0.31                         |
| RADseq              | Km13 FDS11 gDNA                                    | 1,059,856   | SRR1585260               | 158,978,400       | 0.25                         |
| RADseq              | Km14 ERIN12 gDNA                                   | 867,305     | SRR1585261               | 130,095,750       | 0.20                         |
| RADseq              | Km15 FDS09 gDNA                                    | 1,587,698   | SRR1585262               | 238,154,700       | 0.37                         |
| RADseq              | Km16 PC12 gDNA                                     | 1,062,268   | SRR1585263               | 159,340,200       | 0.25                         |
| RADseq              | Km17 FDS02 gDNA                                    | 1,352,690   | SRR1585264               | 202,903,500       | 0.32                         |
| RADseq              | Km18 EPP04 gDNA                                    | 1,223,542   | SRR1585266               | 183,531,300       | 0.29                         |
| RADseq              | Km19 FDS10 gDNA                                    | 1,167,249   | SRR1585268               | 175,087,350       | 0.27                         |

<sup>1</sup>Reference: Mesak F *et al.* 2014;<sup>2</sup><http://www.ncbi.nlm.nih.gov/sra/>;<sup>3</sup>Kmar genome size: 642,279,823 bp.
