# Supplementary material for: Transcriptomics of diapause in an isogenic self-fertilizing vertebrate
Source: PubMed Central journal article supplement (PMC4657215; doi:10.1186/s12864-015-2210-0), 2015-11-23

Supplementary Fig. S1.

**A.**

| RNA<br>Sample | NanoDrop 8000                |                       | BGI - Agilent2100            |     |         |
|---------------|------------------------------|-----------------------|------------------------------|-----|---------|
|               | Total Mass ( $\mu\text{g}$ ) | $\text{OD}_{260/280}$ | Total Mass ( $\mu\text{g}$ ) | RIN | 28S/18S |
| 01            | 213.8                        | 2.13                  | 163.9                        | 9.4 | 1.3     |
| 02            | 238.1                        | 2.08                  | 232.4                        | 9.0 | 1.1     |
| 03            | 144.6                        | 2.00                  | 125.2                        | 9.0 | 0.8     |
| 04            | 164.3                        | 2.01                  | 125.1                        | 8.0 | 0.9     |
| 05            | 24.6                         | 1.95                  | 31.3                         | 8.8 | 1.1     |

**B.**

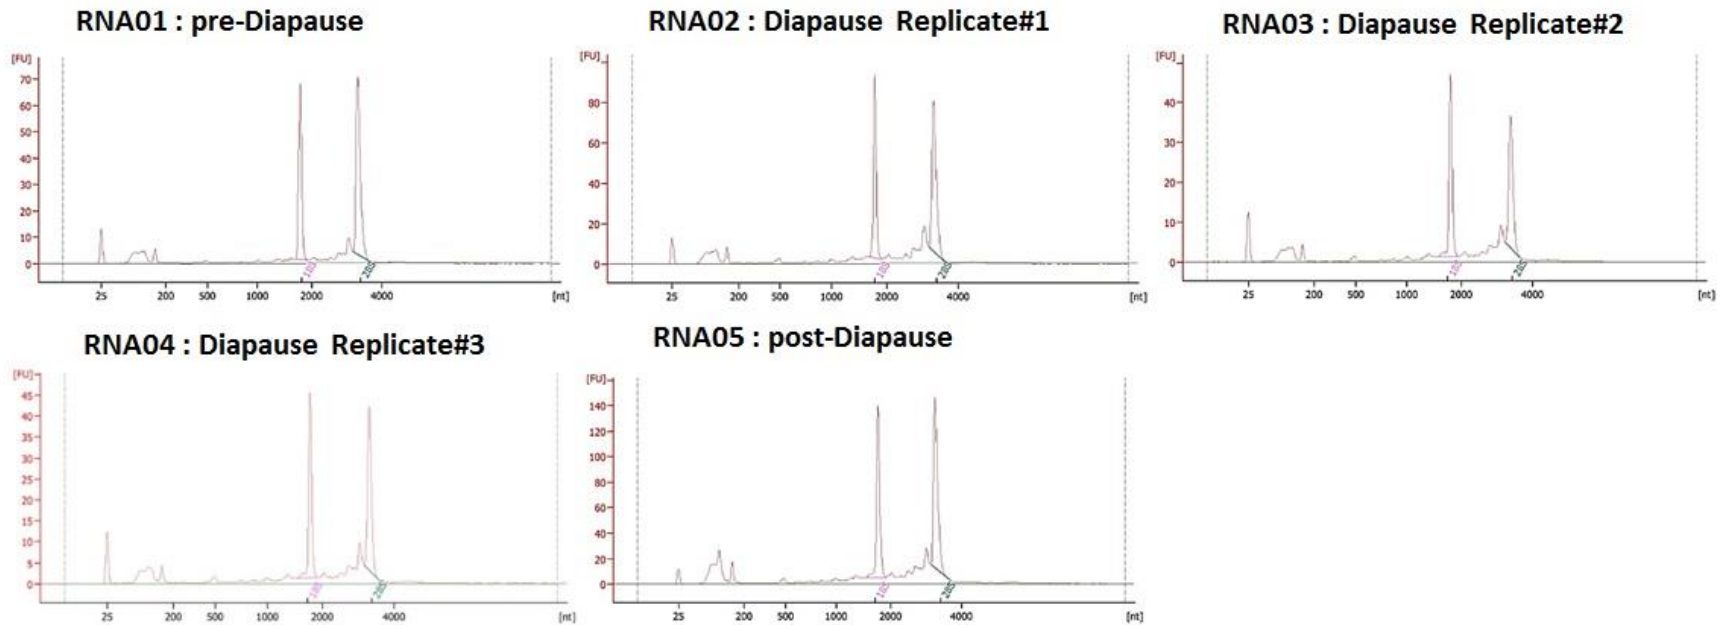

Supplementary Fig. S2.

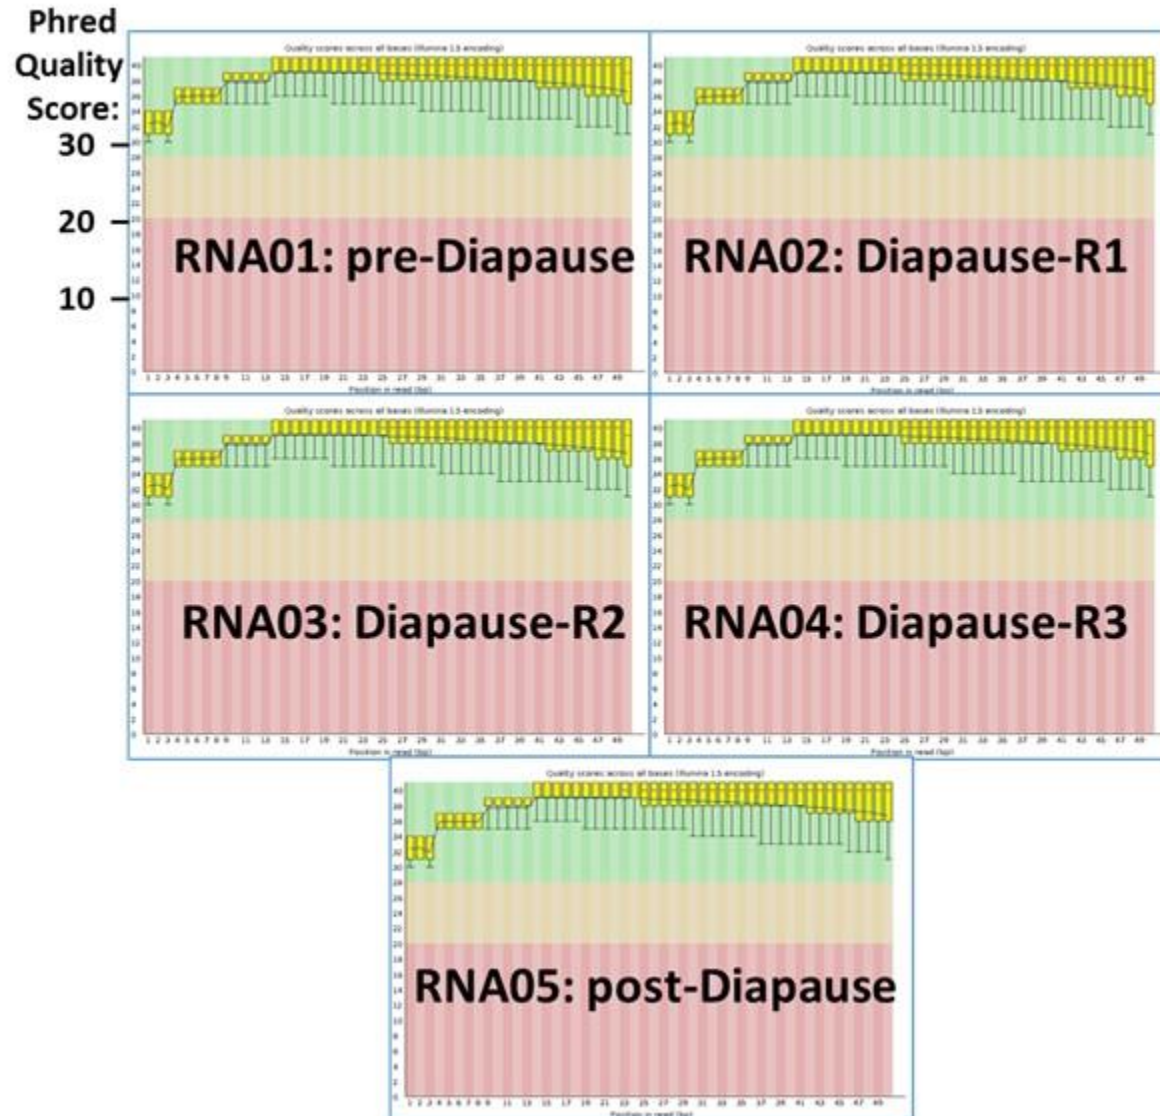

Supplementary Fig. S3.

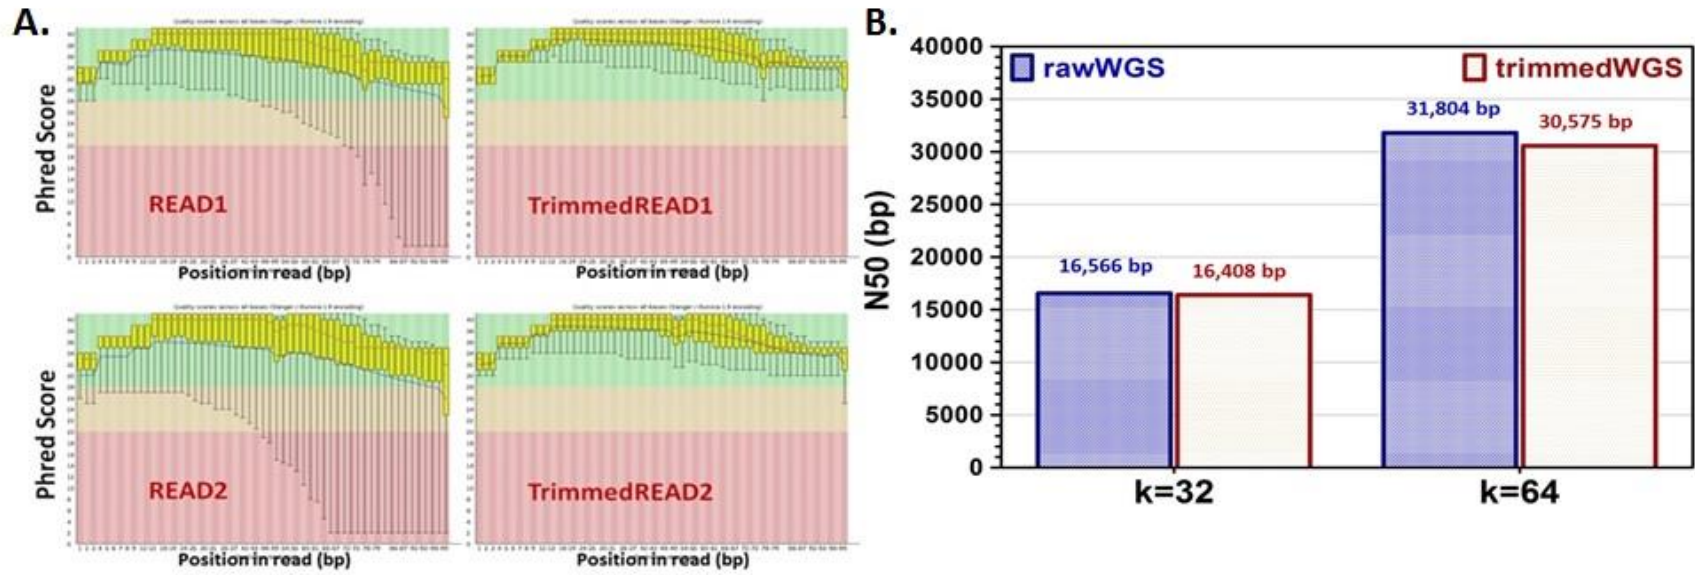

Supplementary Fig. S4.

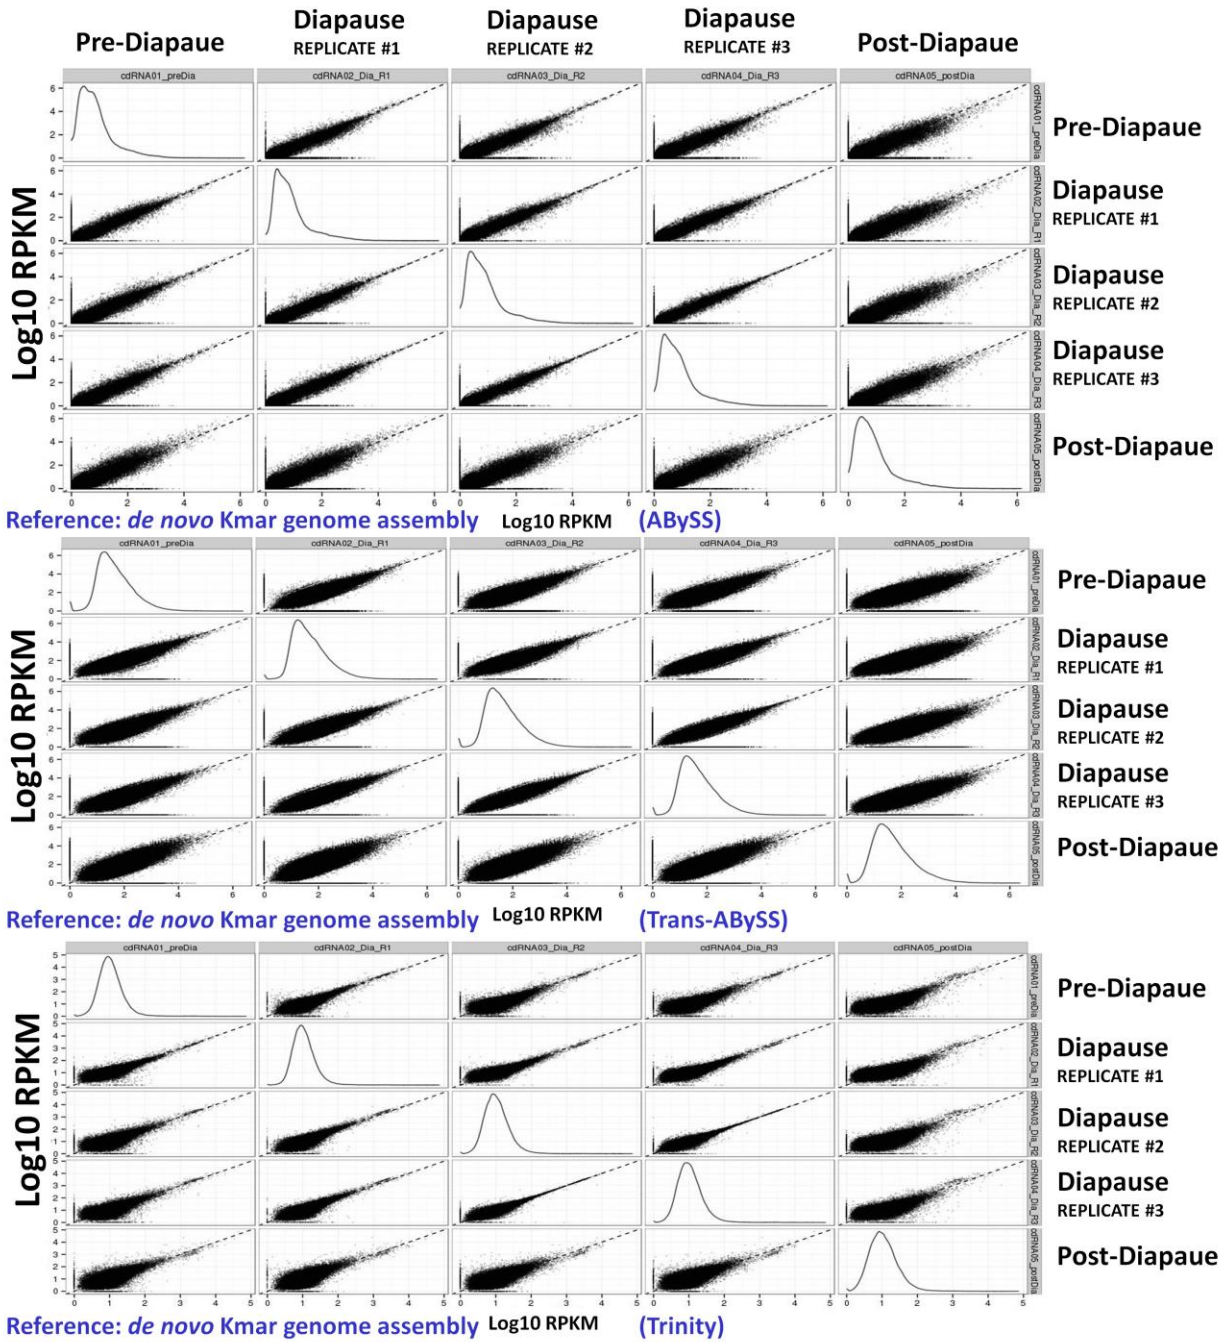

Supplementary Fig. S5.

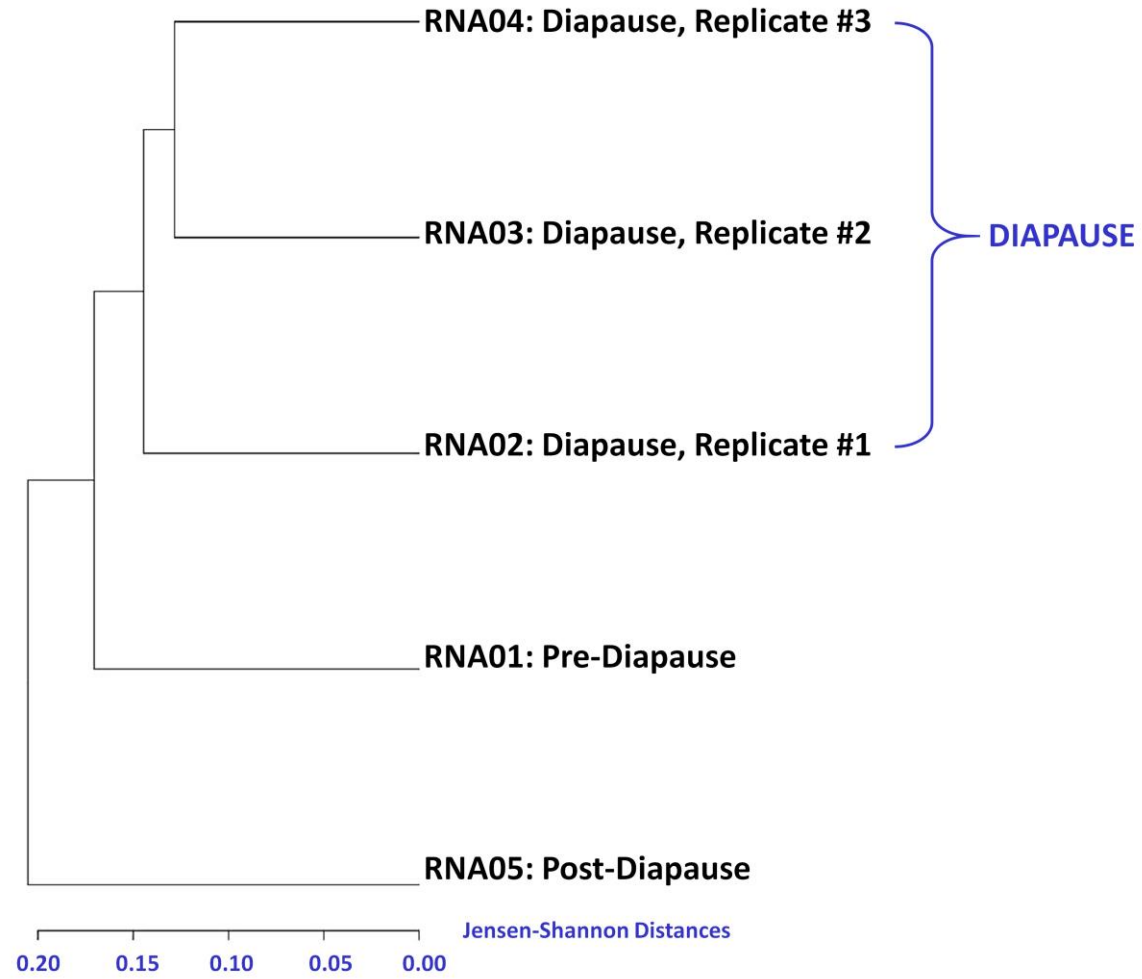

Supplement: 12864_2015_2210_MOESM2_ESM.pdf [file 12864_2015_2210_MOESM2_ESM.pdf]
